# Supplementary material for: Chromosome 19 microRNA cluster enhances cell reprogramming by inhibiting epithelial-to-mesenchymal transition
Source: PubMed Central journal article supplement (PMC7033247; doi:10.1038/s41598-020-59812-8), 2020-02-20
Supplement: 41598_2020_59812_MOESM2_ESM.pdf [file 41598_2020_59812_MOESM2_ESM.pdf]

**Sheet "miRNAs 759-GFP exp1":** Small RNA sequencing data analysis of miRNAs differentially expressed in HEK293 cells transfected with 759 sgRNA/SAM compared to GFP transfected control

**Sheet "miRNAs 759-GFP exp2":** Small RNA sequencing data analysis of miRNAs differentially expressed in HEK293 cells transfected with 759 sgRNA/SAM compared to GFP transfected control

**Sheet "miRNAs 620-GFP":** Small RNA sequencing data analysis of miRNAs differentially expressed in HEK293 cells transfected with 620 sgRNA/SAM compared to GFP transfected control

**Sheet "Cistrons 759-GFP exp2":** Small RNA sequencing data analysis of miRNA cistrons differentially expressed in HEK293 cells transfected with 759 sgRNA/SAM compared to GFP transfected control

**Sheet "Cistrons 620-GFP":** Small RNA sequencing data analysis of miRNA cistrons differentially expressed in HEK293 cells transfected with 620 sgRNA/SAM compared to GFP transfected control

Normalized relative Frequency

| miRNA        | CRISPR/Cas9 | GFP       | Fold change | PValue     | FDR        |
|--------------|-------------|-----------|-------------|------------|------------|
| 525-3p(1)    | 0.004799%   | 0.000005% | 900.5       | 6.0011E-04 | 9.1854E-03 |
| 520e-3p(1)   | 0.003716%   | 0.000005% | 692.4       | 4.9271E-05 | 1.3198E-03 |
| 518c-3p(1)   | 0.024946%   | 0.000040% | 631.2       | 1.1291E-06 | 2.3324E-04 |
| 520a-3p(1)   | 0.003212%   | 0.000005% | 597.8       | 9.0259E-05 | 2.0759E-03 |
| 519e-5p(1)   | 0.003097%   | 0.000005% | 568.3       | 5.9996E-04 | 9.1854E-03 |
| 526b-5p(1)   | 0.017139%   | 0.000040% | 432.9       | 3.5435E-06 | 2.9529E-04 |
| 517STAR(3)   | 0.002118%   | 0.000006% | 379.7       | 3.0914E-04 | 5.8157E-03 |
| 512-3p(2)    | 0.082218%   | 0.000245% | 335.8       | 1.2440E-06 | 2.3324E-04 |
| 515(2)       | 0.046566%   | 0.000144% | 322.4       | 2.6157E-05 | 8.5295E-04 |
| 515STAR(2)   | 0.017935%   | 0.000057% | 315.1       | 1.2836E-04 | 2.6741E-03 |
| 520d-3p(1)   | 0.001744%   | 0.000006% | 306.1       | 1.8208E-04 | 3.6907E-03 |
| 885(1)       | 0.001702%   | 0.000006% | 301.8       | 4.7969E-04 | 7.8258E-03 |
| 519c-3p(1)   | 0.019011%   | 0.000073% | 260.2       | 1.0356E-06 | 2.3324E-04 |
| 518b-3p(1)   | 0.014500%   | 0.000057% | 254.5       | 6.3584E-06 | 3.9740E-04 |
| 512-5p(2)    | 0.019217%   | 0.000076% | 254.1       | 2.0160E-06 | 2.9529E-04 |
| 518a-1-3p(1) | 0.001476%   | 0.000006% | 251.1       | 1.1268E-04 | 2.4146E-03 |
| 518a-2-3p(1) | 0.001476%   | 0.000006% | 251.1       | 1.1268E-04 | 2.4146E-03 |
| 519b-3p(1)   | 0.005728%   | 0.000023% | 249.8       | 2.4825E-06 | 2.9529E-04 |
| 498(1)       | 0.021764%   | 0.000093% | 234.1       | 3.3188E-06 | 2.9529E-04 |
| 520e-5p(1)   | 0.001279%   | 0.000006% | 214.3       | 9.1338E-05 | 2.0759E-03 |
| 525-5p(1)    | 0.018235%   | 0.000090% | 202.2       | 2.8213E-06 | 2.9529E-04 |
| 519e-3p(1)   | 0.001049%   | 0.000006% | 168.5       | 3.1017E-04 | 5.8157E-03 |
| 517a(2)      | 0.037037%   | 0.000224% | 165.6       | 1.7670E-05 | 6.9748E-04 |
| 518d-3p(1)   | 0.006366%   | 0.000039% | 162.8       | 9.1901E-06 | 4.6112E-04 |
| 518c-5p(1)   | 0.000991%   | 0.000006% | 161.5       | 3.4919E-04 | 6.2355E-03 |
| 518d-5p(5)   | 0.011081%   | 0.000071% | 155.1       | 9.2224E-06 | 4.6112E-04 |
| 498STAR(1)   | 0.000943%   | 0.000006% | 150.3       | 4.7998E-04 | 7.8258E-03 |
| 524STAR(1)   | 0.000936%   | 0.000006% | 148.0       | 2.7901E-03 | 3.6984E-02 |
| 519d(1)      | 0.020602%   | 0.000141% | 145.9       | 2.5891E-05 | 8.5295E-04 |
| 1323(1)      | 0.037557%   | 0.000260% | 144.3       | 5.6153E-07 | 2.3324E-04 |
| 518b-5p(1)   | 0.000905%   | 0.000006% | 142.9       | 3.2734E-04 | 5.9879E-03 |
| 526a-1-3p(1) | 0.000849%   | 0.000006% | 131.5       | 3.0958E-04 | 5.8157E-03 |
| 520f-5p(1)   | 0.000829%   | 0.000007% | 126.2       | 4.0502E-04 | 6.9956E-03 |
| 1270(2)      | 0.000784%   | 0.000006% | 123.3       | 3.4036E-03 | 4.4012E-02 |
| 520g-3p(2)   | 0.015097%   | 0.000127% | 119.0       | 9.9301E-06 | 4.6547E-04 |
| 518e-5p(5)   | 0.013503%   | 0.000122% | 110.8       | 5.5705E-06 | 3.7980E-04 |
| 524(1)       | 0.049101%   | 0.000467% | 105.3       | 4.4260E-05 | 1.2767E-03 |
| 520f-3p(1)   | 0.063792%   | 0.000620% | 102.9       | 1.0864E-05 | 4.7930E-04 |
| 516b(2)      | 0.020732%   | 0.000208% | 99.9        | 2.3803E-05 | 8.5010E-04 |
| 520a-5p(1)   | 0.035758%   | 0.000377% | 94.8        | 1.9058E-05 | 7.1466E-04 |
| 519dSTAR(1)  | 0.000657%   | 0.000007% | 94.4        | 6.5445E-04 | 9.8168E-03 |
| 520b-3p(2)   | 0.013027%   | 0.000142% | 91.8        | 4.8170E-05 | 1.3198E-03 |
| 526b-3p(1)   | 0.005214%   | 0.000058% | 90.3        | 1.4756E-05 | 6.1482E-04 |

|              |           |           |       |            |            |
|--------------|-----------|-----------|-------|------------|------------|
| 521-2STAR(1) | 0.000635% | 0.000007% | 89.9  | 3.5900E-03 | 4.5636E-02 |
| 517b(1)      | 0.008088% | 0.000090% | 89.7  | 5.4469E-06 | 3.7980E-04 |
| 523-3p(1)    | 0.004434% | 0.000057% | 77.7  | 7.6582E-06 | 4.4182E-04 |
| 520g-5p(2)   | 0.001844% | 0.000025% | 73.2  | 7.4178E-05 | 1.7946E-03 |
| 518f-3p(1)   | 0.012531% | 0.000187% | 67.0  | 3.6687E-05 | 1.1006E-03 |
| 520d-5p(1)   | 0.025045% | 0.000432% | 58.0  | 8.8336E-04 | 1.2500E-02 |
| 516STAR(4)   | 0.000433% | 0.000008% | 53.1  | 5.0960E-03 | 5.9718E-02 |
| 518e-3p(1)   | 0.002287% | 0.000061% | 37.4  | 8.3481E-04 | 1.2277E-02 |
| 519a-1-5p(1) | 0.003783% | 0.000108% | 35.1  | 6.9123E-05 | 1.7281E-03 |
| 1283-2-3p(1) | 0.000763% | 0.000029% | 26.6  | 1.8499E-03 | 2.5624E-02 |
| 1283-5p(2)   | 0.007164% | 0.000342% | 20.9  | 5.3322E-05 | 1.3790E-03 |
| 519a-2-5p(2) | 0.002844% | 0.000137% | 20.7  | 3.4599E-05 | 1.0812E-03 |
| 518a-5p(3)   | 0.007050% | 0.000397% | 17.7  | 4.1041E-04 | 6.9956E-03 |
| 133a(2)      | 0.002260% | 0.000205% | 11.0  | 6.6827E-03 | 7.5940E-02 |
| 519a-3p(2)   | 0.005371% | 0.000487% | 11.0  | 4.9883E-03 | 5.9384E-02 |
| 1323STAR(1)  | 0.000384% | 0.000036% | 10.5  | 1.8648E-02 | 1.8163E-01 |
| 522-3p(1)    | 0.002773% | 0.000328% | 8.5   | 2.8108E-03 | 3.6984E-02 |
| 124STAR(3)   | 0.000448% | 0.000057% | 7.9   | 2.0200E-02 | 1.8937E-01 |
| 489(1)       | 0.001916% | 0.000281% | 6.8   | 5.6026E-04 | 8.9403E-03 |
| 516a(2)      | 0.012263% | 0.001935% | 6.3   | 1.8791E-03 | 2.5624E-02 |
| 521(2)       | 0.005693% | 0.000966% | 5.9   | 1.2654E-02 | 1.3182E-01 |
| 539(1)       | 0.001254% | 0.000216% | 5.8   | 4.3859E-03 | 5.3055E-02 |
| 449c(1)      | 0.009596% | 0.001836% | 5.2   | 4.1839E-03 | 5.2298E-02 |
| 135bSTAR(1)  | 0.000513% | 0.000100% | 5.1   | 9.9998E-03 | 1.0869E-01 |
| 449b(1)      | 0.003243% | 0.000639% | 5.1   | 8.5672E-04 | 1.2357E-02 |
| 410(1)       | 0.001409% | 0.000354% | 4.0   | 1.8968E-02 | 1.8238E-01 |
| 377(1)       | 0.002802% | 0.000709% | 4.0   | 7.5486E-03 | 8.3257E-02 |
| 653-3p(1)    | 0.001785% | 0.000486% | 3.7   | 1.2314E-02 | 1.3008E-01 |
| 1185-1-3p(1) | 0.001477% | 0.000433% | 3.4   | 1.5380E-02 | 1.5380E-01 |
| 708STAR(1)   | 0.013535% | 0.004130% | 3.3   | 4.3404E-03 | 5.3055E-02 |
| 139(1)       | 0.007370% | 0.002283% | 3.2   | 1.2065E-02 | 1.2927E-01 |
| 141(1)       | 0.213092% | 0.066232% | 3.2   | 1.3202E-02 | 1.3564E-01 |
| 449a(1)      | 0.014223% | 0.005173% | 2.7   | 1.5178E-02 | 1.5380E-01 |
| 7c(1)        | 0.060556% | 0.122025% | -2.0  | 1.9358E-02 | 1.8377E-01 |
| 92a-1STAR(1) | 0.005018% | 0.011656% | -2.3  | 1.5845E-02 | 1.5637E-01 |
| 588-3p(1)    | 0.000037% | 0.000430% | -11.7 | 7.4211E-03 | 8.3072E-02 |
| 2116STAR(1)  | 0.000025% | 0.000343% | -13.7 | 5.9438E-03 | 6.8582E-02 |

| miRNA        | Normalized frequency (%) |          | Linear fold chan | P value     | FDR         |
|--------------|--------------------------|----------|------------------|-------------|-------------|
|              | g759                     | GFP      |                  |             |             |
| 520f-3p(1)   | 0.000396                 | 0.000000 | 7984.5           | 7.26E-11    | 2.18861E-08 |
| 520a-5p(1)   | 0.000239                 | 0.000000 | 5979.6           | 1.48E-10    | 2.23688E-08 |
| 498(1)       | 0.000226                 | 0.000000 | 4892.1           | 4.52E-11    | 2.18861E-08 |
| 516b(2)      | 0.000193                 | 0.000000 | 4582             | 1.33E-10    | 2.23688E-08 |
| 520d-5p(1)   | 0.000179                 | 0.000000 | 4166.6           | 1.00015E-09 | 7.53866E-08 |
| 518b-3p(1)   | 0.000147                 | 0.000000 | 3693.9           | 5.90E-10    | 5.93238E-08 |
| 524(1)       | 0.000155                 | 0.000000 | 3476             | 2.07E-10    | 2.49705E-08 |
| 520b-3p(2)   | 0.000152                 | 0.000000 | 3408.9           | 2.54897E-09 | 1.70781E-07 |
| 515(2)       | 0.000143                 | 0.000000 | 3329.4           | 1.14243E-07 | 3.62572E-06 |
| 512-5p(2)    | 0.000162                 | 0.000000 | 3190.5           | 1.81385E-08 | 8.41349E-07 |
| 518c-3p(1)   | 0.000138                 | 0.000000 | 3183.4           | 7.70E-10    | 6.63031E-08 |
| 519c-3p(1)   | 0.000126                 | 0.000000 | 2905.9           | 3.9695E-09  | 2.39361E-07 |
| 526b-5p(1)   | 0.000099                 | 0.000000 | 2694             | 2.15827E-08 | 9.29598E-07 |
| 518e-5p(5)   | 0.000102                 | 0.000000 | 2626.8           | 7.31022E-09 | 4.00733E-07 |
| 520g-3p(2)   | 0.000142                 | 0.000000 | 2419             | 7.32396E-08 | 2.45353E-06 |
| 518f-3p(1)   | 0.000096                 | 0.000000 | 2383.2           | 1.59155E-08 | 7.99754E-07 |
| 520a-3p(1)   | 0.000081                 | 0.000000 | 2280.1           | 4.81176E-08 | 1.70676E-06 |
| 1283-5p(2)   | 0.000075                 | 0.000000 | 1847.2           | 3.20844E-07 | 9.67345E-06 |
| 518d-5p(5)   | 0.000083                 | 0.000000 | 1790.4           | 2.37912E-08 | 9.56406E-07 |
| 519b-3p(1)   | 0.000058                 | 0.000000 | 1594.4           | 7.00288E-05 | 0.00162413  |
| 517b(1)      | 0.000069                 | 0.000000 | 1138.2           | 2.03371E-05 | 0.000490532 |
| 525-3p(1)    | 0.000055                 | 0.000000 | 1099.2           | 3.57043E-06 | 9.36074E-05 |
| 512-3p(2)    | 0.001995                 | 0.000002 | 913.1            | 1.60715E-06 | 4.61482E-05 |
| 515STAR(2)   | 0.000064                 | 0.000000 | 837.2            | 0.000281939 | 0.004594851 |
| 139STAR(1)   | 0.000035                 | 0.000000 | 837.2            | 0.000338303 | 0.005368338 |
| 526b-3p(1)   | 0.000028                 | 0.000000 | 750.5            | 0.005200262 | 0.04072413  |
| 519a-1-5p(1) | 0.000027                 | 0.000000 | 704.4            | 0.000137822 | 0.00251838  |
| 518e-3p(1)   | 0.000036                 | 0.000000 | 650              | 0.000496518 | 0.007485007 |
| 520d-3p(1)   | 0.000033                 | 0.000000 | 642.6            | 0.000560511 | 0.008047341 |
| 523-3p(1)    | 0.000023                 | 0.000000 | 628.4            | 0.009877933 | 0.065454874 |
| 654(1)       | 0.000022                 | 0.000000 | 585.5            | 0.001040156 | 0.013066963 |
| 520e-5p(1)   | 0.000016                 | 0.000000 | 489.9            | 0.007027216 | 0.051053145 |
| 514a(3)      | 0.000014                 | 0.000000 | 434.3            | 0.007405478 | 0.053160751 |
| 518c-5p(1)   | 0.000016                 | 0.000000 | 370.7            | 0.004817322 | 0.040345071 |
| 519a-2-5p(2) | 0.000015                 | 0.000000 | 338.3            | 0.012346611 | 0.077552152 |
| 518a-1-3p(1) | 0.000018                 | 0.000000 | 336.1            | 0.001098684 | 0.013250128 |
| 518a-2-3p(1) | 0.000018                 | 0.000000 | 336.1            | 0.001098684 | 0.013250128 |
| 524STAR(1)   | 0.000012                 | 0.000000 | 302.9            | 0.00797213  | 0.056555226 |
| 3934(1)      | 0.000015                 | 0.000000 | 301              | 0.013963396 | 0.085049775 |
| 525-5p(1)    | 0.000145                 | 0.000001 | 278.7            | 2.00933E-06 | 5.5074E-05  |
| 518d-3p(1)   | 0.000014                 | 0.000000 | 277.9            | 0.009307942 | 0.062363209 |
| 520e-3p(1)   | 0.000027                 | 0.000000 | 264.3            | 0.001685811 | 0.018152572 |
| 1270(2)      | 0.000018                 | 0.000000 | 230.2            | 0.002207887 | 0.021710557 |

|              |          |          |       |             |             |
|--------------|----------|----------|-------|-------------|-------------|
| 1294(1)      | 0.000015 | 0.000000 | 212.1 | 0.010678477 | 0.069237866 |
| 498STAR(1)   | 0.000008 | 0.000000 | 174.6 | 0.028199487 | 0.132811174 |
| 1323(1)      | 0.000392 | 0.000002 | 160.2 | 0.000122742 | 0.002467106 |
| 526a-1-3p(1) | 0.000006 | 0.000000 | 139.4 | 0.028666069 | 0.132966457 |
| 519e-5p(1)   | 0.000009 | 0.000000 | 111.9 | 0.035222489 | 0.152315518 |
| 519dSTAR(1)  | 0.000006 | 0.000000 | 111   | 0.031210316 | 0.141502411 |
| 20bSTAR(1)   | 0.000009 | 0.000000 | 109.5 | 0.025375577 | 0.125373646 |
| 517a(2)      | 0.000377 | 0.000005 | 80.6  | 0.000178041 | 0.003157606 |
| 516a(2)      | 0.000162 | 0.000003 | 57.7  | 0.000106173 | 0.002286509 |
| 518a-5p(3)   | 0.000077 | 0.000002 | 47.4  | 0.000782161 | 0.010253111 |
| 302a-3p(1)   | 0.000453 | 0.000010 | 46    | 0.010429265 | 0.068357028 |
| 519a-3p(2)   | 0.000042 | 0.000001 | 42.5  | 0.011125417 | 0.071368366 |
| 302a-5p(1)   | 0.000325 | 0.000008 | 42    | 0.014199521 | 0.085623114 |
| 519d(1)      | 0.000110 | 0.000003 | 37.2  | 0.002180385 | 0.021710557 |
| 381(1)       | 0.000037 | 0.000003 | 10.6  | 0.03718249  | 0.156790502 |
| 139(1)       | 0.000090 | 0.000009 | 9.8   | 0.001529668 | 0.016948117 |
| 29b-2STAR(1) | 0.000057 | 0.000006 | 9.5   | 0.030270512 | 0.138465369 |
| 522-3p(1)    | 0.000066 | 0.000008 | 8.1   | 0.032752039 | 0.145216761 |
| 1(2)         | 0.000084 | 0.000012 | 6.9   | 0.006282099 | 0.047351323 |
| 135b(1)      | 0.000363 | 0.000054 | 6.7   | 0.000244558 | 0.004096346 |
| 146b(1)      | 0.001193 | 0.000261 | 4.6   | 3.31383E-08 | 1.2489E-06  |
| 708STAR(1)   | 0.000082 | 0.000018 | 4.5   | 0.004891279 | 0.040403305 |
| 215(1)       | 0.000059 | 0.000019 | 3.1   | 0.0189531   | 0.10506652  |
| 449c(1)      | 0.000064 | 0.000021 | 3.1   | 0.038884353 | 0.161053152 |
| 203(1)       | 0.000210 | 0.000070 | 3     | 0.000626416 | 0.008784397 |
| 708(1)       | 0.000317 | 0.000111 | 2.9   | 0.006100762 | 0.046566574 |
| 455-3p(1)    | 0.000135 | 0.000049 | 2.7   | 0.002115193 | 0.021617988 |
| 1292(1)      | 0.000063 | 0.000025 | 2.5   | 0.043775369 | 0.175976983 |
| 103(2)       | 0.032019 | 0.013164 | 2.4   | 0.000707122 | 0.009475432 |
| 134(1)       | 0.000127 | 0.000055 | 2.3   | 0.013842295 | 0.085049775 |
| 455-5p(1)    | 0.000261 | 0.000116 | 2.3   | 0.022553001 | 0.116234699 |
| 17STAR(1)    | 0.005708 | 0.002817 | 2     | 0.000194661 | 0.003353734 |
| 141(1)       | 0.000650 | 0.000328 | 2     | 0.003131305 | 0.029048874 |
| 200c(1)      | 0.000336 | 0.000165 | 2     | 0.005174341 | 0.04072413  |
| 33a(1)       | 0.000441 | 0.000902 | -2    | 0.00384693  | 0.034113216 |
| 345(1)       | 0.000288 | 0.000579 | -2    | 0.00414025  | 0.035665294 |
| 505(1)       | 0.000351 | 0.000689 | -2    | 0.006905101 | 0.051053145 |
| 1296(1)      | 0.000193 | 0.000395 | -2    | 0.016215563 | 0.094019084 |
| 1305(1)      | 0.000058 | 0.000117 | -2    | 0.018576054 | 0.104685613 |
| 181b(2)      | 0.001079 | 0.002291 | -2.1  | 0.000134802 | 0.00251838  |
| 301b(1)      | 0.000252 | 0.000555 | -2.2  | 0.000395244 | 0.006111079 |
| 218(2)       | 0.003804 | 0.008706 | -2.3  | 0.001009974 | 0.012957748 |
| 15bSTAR(1)   | 0.000093 | 0.000213 | -2.3  | 0.001725033 | 0.018249033 |
| 30b(1)       | 0.000728 | 0.001694 | -2.3  | 0.002232263 | 0.021710557 |
| 99a(1)       | 0.001553 | 0.003734 | -2.4  | 0.000117082 | 0.002434503 |

|              |          |          |        |             |             |
|--------------|----------|----------|--------|-------------|-------------|
| 188(1)       | 0.000080 | 0.000197 | -2.5   | 0.021394675 | 0.113166572 |
| 577(1)       | 0.000027 | 0.000066 | -2.5   | 0.025573729 | 0.125373646 |
| 34aSTAR(1)   | 0.000065 | 0.000169 | -2.6   | 0.006947865 | 0.051053145 |
| 15a(1)       | 0.001584 | 0.004300 | -2.7   | 0.000512216 | 0.007533317 |
| 25(1)        | 0.007010 | 0.020345 | -2.9   | 1.53504E-05 | 0.000385678 |
| 491(1)       | 0.000029 | 0.000083 | -2.9   | 0.035590065 | 0.152315518 |
| 32(1)        | 0.001033 | 0.003237 | -3.1   | 0.001545848 | 0.016948117 |
| 29b(2)       | 0.000641 | 0.001967 | -3.1   | 0.016654737 | 0.095645775 |
| 19aSTAR(1)   | 0.000018 | 0.000058 | -3.3   | 0.025282484 | 0.125373646 |
| 365(2)       | 0.000152 | 0.000520 | -3.4   | 0.021589755 | 0.113205409 |
| 500-5p(2)    | 0.000024 | 0.000086 | -3.6   | 0.005101252 | 0.04072413  |
| 362-3p(1)    | 0.000039 | 0.000161 | -4.1   | 0.001364972 | 0.015828421 |
| 1277-5p(1)   | 0.000032 | 0.000132 | -4.2   | 0.004061608 | 0.035494922 |
| 450b(1)      | 0.000065 | 0.000277 | -4.3   | 8.58201E-05 | 0.00191665  |
| 7a-1STAR(2)  | 0.000024 | 0.000111 | -4.6   | 0.000133916 | 0.00251838  |
| 296-5p(1)    | 0.000052 | 0.000268 | -5.1   | 0.00070522  | 0.009475432 |
| 31-3p(1)     | 0.000002 | 0.000045 | -21.1  | 0.023101731 | 0.117715232 |
| 33b(1)       | 0.000007 | 0.000198 | -28.3  | 0.004721154 | 0.040096561 |
| 133a(2)      | 0.000001 | 0.000025 | -31    | 0.023712225 | 0.119153929 |
| 4473-5p(1)   | 0.000000 | 0.000007 | -101.5 | 0.027815896 | 0.132811174 |
| 653-3p(1)    | 0.000000 | 0.000010 | -137.8 | 0.020452653 | 0.10914115  |
| 210STAR(1)   | 0.000000 | 0.000009 | -157.1 | 0.019969962 | 0.107516851 |
| 1269STAR(1)  | 0.000000 | 0.000017 | -161.4 | 0.015524986 | 0.091780066 |
| 605-5p(1)    | 0.000000 | 0.000012 | -168.8 | 0.018383858 | 0.104579869 |
| 26a-2STAR(1) | 0.000000 | 0.000010 | -183.8 | 0.035616066 | 0.152315518 |
| 1537(1)      | 0.000000 | 0.000009 | -194.2 | 0.033240003 | 0.146304538 |
| 561STAR(1)   | 0.000000 | 0.000014 | -230   | 0.008737491 | 0.059871674 |
| 942STAR(1)   | 0.000000 | 0.000012 | -234   | 0.031753679 | 0.141833101 |
| 144(1)       | 0.000000 | 0.000019 | -369.6 | 0.0084048   | 0.05825396  |
| 491STAR(1)   | 0.000000 | 0.000019 | -502.6 | 0.005074749 | 0.04072413  |
| 205(1)       | 0.000000 | 0.000020 | -549.9 | 0.002101957 | 0.021617988 |

| miRNA        | Normalized frequency (%) |          | Linear fold | char P value | FDR         |
|--------------|--------------------------|----------|-------------|--------------|-------------|
|              | g620                     | GFP      |             |              |             |
| 520f-3p(1)   | 0.000396                 | 0.000000 | 6039        | 1.00E-10     | 3.02644E-08 |
| 498(1)       | 0.000226                 | 0.000000 | 3099.2      | 7.96E-11     | 3.02644E-08 |
| 520g-3p(2)   | 0.000142                 | 0.000000 | 2587        | 6.74946E-08  | 2.71328E-06 |
| 512-5p(2)    | 0.000162                 | 0.000000 | 2532.6      | 2.39758E-08  | 1.31431E-06 |
| 520a-5p(1)   | 0.000239                 | 0.000000 | 2465        | 4.45E-10     | 5.37235E-08 |
| 516b(2)      | 0.000193                 | 0.000000 | 2228.4      | 3.29E-10     | 5.37235E-08 |
| 520d-5p(1)   | 0.000179                 | 0.000000 | 2141.2      | 2.29328E-09  | 1.72856E-07 |
| 524(1)       | 0.000155                 | 0.000000 | 1992.2      | 4.20E-10     | 5.37235E-08 |
| 520b-3p(2)   | 0.000152                 | 0.000000 | 1970.5      | 5.05537E-09  | 3.3871E-07  |
| 515(2)       | 0.000143                 | 0.000000 | 1713.5      | 2.53311E-07  | 8.98508E-06 |
| 518c-3p(1)   | 0.000138                 | 0.000000 | 1678.3      | 1.74351E-09  | 1.61023E-07 |
| 519c-3p(1)   | 0.000126                 | 0.000000 | 1545.3      | 8.84844E-09  | 5.33561E-07 |
| 518b-3p(1)   | 0.000147                 | 0.000000 | 1505.5      | 1.86926E-09  | 1.61023E-07 |
| 515STAR(2)   | 0.000064                 | 0.000000 | 1384.8      | 0.000177616  | 0.00428409  |
| 517b(1)      | 0.000069                 | 0.000000 | 1279.6      | 1.79433E-05  | 0.000470426 |
| 518d-5p(5)   | 0.000083                 | 0.000000 | 1135.2      | 4.20203E-08  | 1.9491E-06  |
| 518f-3p(1)   | 0.000096                 | 0.000000 | 982         | 4.91311E-08  | 2.11614E-06 |
| 518e-5p(5)   | 0.000102                 | 0.000000 | 955.8       | 2.69621E-08  | 1.35485E-06 |
| 525-3p(1)    | 0.000055                 | 0.000000 | 805.4       | 5.06652E-06  | 0.000145481 |
| 526b-5p(1)   | 0.000099                 | 0.000000 | 773.2       | 1.07838E-07  | 4.06413E-06 |
| 1283-5p(2)   | 0.000075                 | 0.000000 | 767.7       | 9.27683E-07  | 2.94417E-05 |
| 520e-3p(1)   | 0.000027                 | 0.000000 | 666.2       | 0.000786173  | 0.01281249  |
| 518e-3p(1)   | 0.000036                 | 0.000000 | 589.2       | 0.000540294  | 0.009872636 |
| 520a-3p(1)   | 0.000081                 | 0.000000 | 556.5       | 2.95045E-07  | 9.884E-06   |
| 512-3p(2)    | 0.001994                 | 0.000004 | 553.5       | 2.7574E-06   | 8.31355E-05 |
| 520d-3p(1)   | 0.000033                 | 0.000000 | 483.5       | 0.000713306  | 0.011947876 |
| 519b-3p(1)   | 0.000058                 | 0.000000 | 417.9       | 0.000271778  | 0.005911968 |
| 139STAR(1)   | 0.000035                 | 0.000000 | 381.1       | 0.000677964  | 0.011680359 |
| 1294(1)      | 0.000015                 | 0.000000 | 276.1       | 0.009053616  | 0.084206932 |
| 518a-1-3p(1) | 0.000018                 | 0.000000 | 275.4       | 0.0012918    | 0.019473882 |
| 518a-2-3p(1) | 0.000018                 | 0.000000 | 275.4       | 0.0012918    | 0.019473882 |
| 519a-1-5p(1) | 0.000026                 | 0.000000 | 197.8       | 0.000464161  | 0.008746529 |
| 3934(1)      | 0.000015                 | 0.000000 | 194.9       | 0.017888272  | 0.139174728 |
| 526b-3p(1)   | 0.000028                 | 0.000000 | 192.3       | 0.012702609  | 0.110428093 |
| 518d-3p(1)   | 0.000014                 | 0.000000 | 189         | 0.011825443  | 0.10642899  |
| 20bSTAR(1)   | 0.000009                 | 0.000000 | 184.5       | 0.01868913   | 0.142652471 |
| 654(1)       | 0.000022                 | 0.000000 | 165.6       | 0.002895518  | 0.034919945 |
| 523-3p(1)    | 0.000023                 | 0.000000 | 161.5       | 0.0220479    | 0.160179324 |
| 518c-5p(1)   | 0.000016                 | 0.000000 | 159.7       | 0.008508845  | 0.084112022 |
| 519a-2-5p(2) | 0.000015                 | 0.000000 | 149.8       | 0.019814179  | 0.147505553 |
| 525-5p(1)    | 0.000145                 | 0.000001 | 142.4       | 5.85391E-06  | 0.00016045  |
| 524STAR(1)   | 0.000012                 | 0.000000 | 87          | 0.018002701  | 0.139174728 |
| 1323(1)      | 0.000390                 | 0.000005 | 81.5        | 0.000302583  | 0.00629163  |

|             |          |          |      |             |             |
|-------------|----------|----------|------|-------------|-------------|
| 517a(2)     | 0.000375 | 0.000007 | 51.3 | 0.000354108 | 0.006887972 |
| 516a(2)     | 0.000161 | 0.000005 | 34.2 | 0.000274519 | 0.005911968 |
| 519d(1)     | 0.000109 | 0.000004 | 29.1 | 0.003187193 | 0.036959178 |
| 518a-5p(3)  | 0.000076 | 0.000003 | 23.4 | 0.002720933 | 0.034431258 |
| 184(1)      | 0.000046 | 0.000003 | 14.7 | 0.008697465 | 0.084206932 |
| 1(2)        | 0.000088 | 0.000008 | 11.7 | 0.001288371 | 0.019473882 |
| 135b(1)     | 0.000377 | 0.000040 | 9.5  | 5.59821E-05 | 0.001406551 |
| 522-3p(1)   | 0.000067 | 0.000007 | 9.4  | 0.024556504 | 0.174206729 |
| 338-3p(1)   | 0.000865 | 0.000111 | 7.8  | 0.002740797 | 0.034431258 |
| 449c(1)     | 0.000072 | 0.000013 | 5.6  | 0.004016519 | 0.045697377 |
| 139(1)      | 0.000083 | 0.000017 | 4.9  | 0.013902921 | 0.118076918 |
| 200a(1)     | 0.000062 | 0.000014 | 4.4  | 0.003160173 | 0.036959178 |
| 449a(1)     | 0.000166 | 0.000046 | 3.6  | 0.001911954 | 0.026388436 |
| 200b(1)     | 0.000099 | 0.000028 | 3.6  | 0.004406716 | 0.049208325 |
| 455-3p(1)   | 0.000143 | 0.000041 | 3.5  | 0.000354007 | 0.006887972 |
| 338-5p(1)   | 0.000162 | 0.000057 | 2.8  | 0.001925524 | 0.026388436 |
| 203(1)      | 0.000194 | 0.000086 | 2.2  | 0.006032226 | 0.063814601 |
| 25(1)       | 0.008910 | 0.018445 | -2.1 | 0.000651094 | 0.01154735  |
| 450b(1)     | 0.000111 | 0.000231 | -2.1 | 0.015469931 | 0.127837862 |
| 1296(1)     | 0.000183 | 0.000405 | -2.2 | 0.009127112 | 0.084206932 |
| 7a-1STAR(2) | 0.000042 | 0.000093 | -2.2 | 0.016869372 | 0.135629752 |
| 99a(1)      | 0.001615 | 0.003673 | -2.3 | 0.000218399 | 0.005065184 |
| 1305(1)     | 0.000054 | 0.000122 | -2.3 | 0.007837624 | 0.078768119 |
| 24-2STAR(1) | 0.000066 | 0.000173 | -2.6 | 0.00204908  | 0.02739748  |
| 21STAR(1)   | 0.000171 | 0.000457 | -2.7 | 0.001431262 | 0.021050028 |
| 577(1)      | 0.000023 | 0.000070 | -3   | 0.009092982 | 0.084206932 |
| 296-5p(1)   | 0.000066 | 0.000254 | -3.9 | 0.002836218 | 0.034902846 |
| 4473-3p(1)  | 0.000000 | 0.000013 | -329 | 0.012819182 | 0.110428093 |



| miRNA cistron | Normalized frequency (%) |          | near fold change | P value     | FDR         |
|---------------|--------------------------|----------|------------------|-------------|-------------|
|               | g620                     | GFP      |                  |             |             |
| 1270-1(1)     | 0.000959                 | 0.000003 | 300.3            | 0.008046674 | 0.064610062 |
| 1270-2(1)     | 0.000959                 | 0.000003 | 300.3            | 0.008046674 | 0.064610062 |
| 498(46)       | 0.693319                 | 0.002436 | 284.6            | 7.20E-14    | 1.97E-11    |
| 1294(1)       | 0.001603                 | 0.000007 | 217.7            | 0.007712637 | 0.064610062 |
| 937(1)        | 0.001019                 | 0.000009 | 110.3            | 0.021666308 | 0.134429594 |
| 302a(5)       | 0.113243                 | 0.008012 | 14.1             | 0.006357459 | 0.061985226 |
| 139(1)        | 0.012621                 | 0.000915 | 13.8             | 0.000211924 | 0.009642563 |
| 135b(1)       | 0.037467                 | 0.005622 | 6.7              | 0.000132641 | 0.009031184 |
| 146b(1)       | 0.123156                 | 0.025508 | 4.8              | 3.67364E-09 | 5.01452E-07 |
| 708(1)        | 0.040645                 | 0.012593 | 3.2              | 0.000317432 | 0.012379861 |
| 203(1)        | 0.021656                 | 0.006905 | 3.1              | 0.000399672 | 0.013638817 |
| 134(43)       | 0.033642                 | 0.011150 | 3                | 3.61278E-05 | 0.003287633 |
| 216a(3)       | 0.012922                 | 0.004774 | 2.7              | 0.002320623 | 0.036251694 |
| 1292(1)       | 0.006497                 | 0.002501 | 2.6              | 0.035569866 | 0.195311561 |
| 103-1(2)      | 3.259458                 | 1.280146 | 2.5              | 0.000165406 | 0.009031184 |
| 455(1)        | 0.040154                 | 0.016041 | 2.5              | 0.001699152 | 0.035682195 |
| 449a(3)       | 0.022143                 | 0.009460 | 2.3              | 0.003834372 | 0.045210394 |
| 141(2)        | 0.100944                 | 0.048612 | 2.1              | 0.000496621 | 0.01506418  |
| 33a(1)        | 0.046845                 | 0.093700 | -2               | 0.004140146 | 0.045210394 |
| 1305(1)       | 0.005938                 | 0.011735 | -2               | 0.019812334 | 0.127523804 |
| 218-1(3)      | 0.396363                 | 0.852876 | -2.2             | 0.000878749 | 0.022924477 |
| 31(1)         | 0.006206                 | 0.014934 | -2.4             | 0.003638362 | 0.045148759 |
| 577(1)        | 0.002711                 | 0.006613 | -2.4             | 0.028354078 | 0.16126382  |
| 579(1)        | 0.002299                 | 0.006272 | -2.7             | 0.016751396 | 0.115822664 |
| 32(1)         | 0.106061                 | 0.332414 | -3.1             | 0.001007669 | 0.022924477 |
| 491(1)        | 0.002903                 | 0.010206 | -3.5             | 0.01107445  | 0.08580957  |
| 1277(1)       | 0.005417                 | 0.020835 | -3.8             | 0.002077521 | 0.036251694 |
| 33b(1)        | 0.001224                 | 0.021944 | -17.9            | 0.00410529  | 0.045210394 |
| 605(1)        | 0.000008                 | 0.001245 | -161.3           | 0.0166515   | 0.115822664 |
| 1537(1)       | 0.000005                 | 0.001003 | -217.9           | 0.026689791 | 0.155027938 |
| 144(2)        | 0.000005                 | 0.002482 | -499.4           | 0.001849369 | 0.036062703 |
| 205(1)        | 0.000004                 | 0.001936 | -526.4           | 0.002230001 | 0.036251694 |

| miRNA cistron  | Normalized frequency (%) |                 | Linear fold  | char P value    | FDR             |
|----------------|--------------------------|-----------------|--------------|-----------------|-----------------|
|                | g620                     | GFP             |              |                 |                 |
| 1294(1)        | 0.001605                 | 0.000005        | 310.8        | 0.005949213     | 0.134927448     |
| 937(1)         | 0.001023                 | 0.000005        | 211.2        | 0.013971577     | 0.181630498     |
| <b>498(46)</b> | <b>0.691542</b>          | <b>0.004213</b> | <b>164.1</b> | <b>2.32E-13</b> | <b>6.34E-11</b> |
| 184(1)         | 0.004653                 | 0.000314        | 14.8         | 0.006555121     | 0.134927448     |
| 135b(1)        | 0.038836                 | 0.004253        | 9.1          | 3.07592E-05     | 0.00279909      |
| 139(1)         | 0.011755                 | 0.001781        | 6.6          | 0.002666126     | 0.090981538     |
| 338(1)         | 0.101467                 | 0.016376        | 6.2          | 0.000205292     | 0.011208917     |
| 449a(3)        | 0.025605                 | 0.005998        | 4.3          | 3.0334E-05      | 0.00279909      |
| 200a(3)        | 0.018333                 | 0.004706        | 3.9          | 0.000125802     | 0.008586004     |
| 1-1(4)         | 0.010001                 | 0.002660        | 3.8          | 0.007729822     | 0.134927448     |
| 203(1)         | 0.019830                 | 0.008730        | 2.3          | 0.005555966     | 0.134927448     |
| 143(2)         | 0.030517                 | 0.014919        | 2            | 0.001713835     | 0.066839556     |
| 1305(1)        | 0.005516                 | 0.012157        | -2.2         | 0.008439253     | 0.134927448     |
| 1296(1)        | 0.018613                 | 0.041084        | -2.2         | 0.008758076     | 0.134927448     |
| 577(1)         | 0.002327                 | 0.006997        | -3           | 0.009145006     | 0.134927448     |
