# Supplementary material for: Chromosome 19 microRNA cluster enhances cell reprogramming by inhibiting epithelial-to-mesenchymal transition
Source: PubMed Central journal article supplement (PMC7033247; doi:10.1038/s41598-020-59812-8), 2020-02-20
Supplement: 41598_2020_59812_MOESM3_ESM.pdf [file 41598_2020_59812_MOESM3_ESM.pdf]

**Sheet "mRNA g759-GFP "**: RNA sequencing data analysis of differentially expressed mRNAs in HEK293 cells transfected with 759 sgRNA/SAM compared to GFP transfected control

**Sheet "mRNA 620-GFP "**: RNA sequencing data analysis of differentially expressed mRNAs in HEK293 cells transfected with 620 sgRNA/SAM compared to GFP transfected control

**Sheet "Differentially expressed mRNAs "**: Differentially expressed mRNAs in HEK293 cells transfected with 759 sgRNA/SAM and 620 sgRNA/SAM compared to control.

**Sheet "GSEA downregulated genes "**: Gene set expression analysis of significantly downregulated mRNAs in HEK293 cells transfected with 759 sgRNA/SAM and 620 sgRNA/SAM compared to control.

| Gene            |            | Transcripts per million (TPM) |         |         |          |            |         |         |         |           |        |        |
|-----------------|------------|-------------------------------|---------|---------|----------|------------|---------|---------|---------|-----------|--------|--------|
|                 |            | Linear Fold Change            | P Value | FDR     | TestMean | TestStdDev | TestMin | TestMax | RefMean | RefStdDev | RefMin | RefMax |
| ENSG00000176371 | ZSCAN2     | -1.5                          | 3.5E-08 | 4.4E-07 | 11.185   | 0.795      | 10.303  | 12.193  | 15.414  | 0.767     | 14.750 | 16.133 |
| ENSG00000196812 | ZSCAN16    | -1.5                          | 5.7E-06 | 4.1E-05 | 17.496   | 1.723      | 16.514  | 20.068  | 25.203  | 1.730     | 24.242 | 27.797 |
| ENSG00000196605 | ZNF846     | -1.5                          | 1.5E-05 | 9.5E-05 | 3.815    | 0.623      | 3.209   | 4.408   | 5.649   | 0.503     | 5.102  | 6.077  |
| ENSG00000196152 | ZNF79      | -1.5                          | 1.7E-06 | 1.4E-05 | 18.591   | 2.123      | 16.501  | 21.470  | 26.885  | 1.586     | 24.753 | 28.591 |
| ENSG00000182903 | ZNF721     | -1.5                          | 0.00087 | 0.00317 | 21.331   | 5.219      | 13.542  | 24.667  | 32.743  | 3.041     | 29.786 | 35.366 |
| ENSG00000175105 | ZNF654     | -1.5                          | 6.6E-06 | 4.7E-05 | 15.957   | 2.967      | 11.639  | 18.388  | 23.680  | 1.691     | 22.131 | 25.144 |
| ENSG00000196357 | ZNF565     | -1.5                          | 0.00018 | 0.00083 | 2.645    | 0.522      | 2.050   | 3.198   | 3.939   | 0.123     | 3.775  | 4.072  |
| ENSG00000177599 | ZNF491     | -1.5                          | 5.8E-05 | 0.00031 | 3.145    | 0.196      | 2.988   | 3.394   | 4.871   | 0.361     | 4.406  | 5.157  |
| ENSG00000196263 | ZNF471     | -1.5                          | 1.3E-05 | 8.7E-05 | 8.908    | 1.427      | 6.867   | 10.167  | 13.460  | 1.692     | 11.612 | 14.896 |
| ENSG00000083817 | ZNF416     | -1.5                          | 1.2E-06 | 1E-05   | 13.636   | 1.224      | 12.487  | 15.079  | 19.544  | 0.244     | 19.259 | 19.748 |
| ENSG00000186496 | ZNF396     | -1.5                          | 0.00036 | 0.00148 | 1.564    | 0.142      | 1.365   | 1.680   | 2.144   | 0.197     | 1.977  | 2.362  |
| ENSG00000188994 | ZNF292     | -1.5                          | 0.02339 | 0.04988 | 13.493   | 4.618      | 6.585   | 16.198  | 20.790  | 2.262     | 18.546 | 22.738 |
| ENSG00000149050 | ZNF214     | -1.5                          | 8.7E-06 | 6E-05   | 6.355    | 0.696      | 5.647   | 7.031   | 9.118   | 1.019     | 7.883  | 9.954  |
| ENSG00000121417 | ZNF211     | -1.5                          | 7.2E-09 | 1.1E-07 | 18.941   | 0.859      | 17.863  | 19.682  | 27.838  | 2.177     | 24.584 | 29.056 |
| ENSG00000096654 | ZNF184     | -1.5                          | 3.7E-07 | 3.6E-06 | 15.728   | 2.200      | 12.777  | 18.048  | 23.763  | 1.829     | 22.138 | 25.346 |
| ENSG00000169946 | ZFPM2      | -1.5                          | 3.9E-05 | 0.00022 | 2.320    | 0.339      | 2.044   | 2.786   | 3.409   | 0.213     | 3.230  | 3.717  |
| ENSG00000205189 | ZBTB10     | -1.5                          | 1.1E-05 | 7.3E-05 | 24.374   | 4.197      | 18.123  | 27.109  | 36.033  | 2.289     | 33.560 | 37.980 |
| ENSG00000143816 | WNT9A      | -1.5                          | 4.5E-05 | 0.00025 | 4.838    | 0.746      | 4.156   | 5.522   | 6.919   | 0.409     | 6.526  | 7.272  |
| ENSG00000228775 | WEE2-AS1   | -1.5                          | 0.03014 | 0.06125 | 0.468    | 0.134      | 0.304   | 0.605   | 0.738   | 0.154     | 0.551  | 0.865  |
| ENSG00000178201 | VN1R1      | -1.5                          | 0.0021  | 0.00668 | 3.455    | 0.481      | 2.769   | 3.819   | 5.379   | 0.278     | 5.062  | 5.741  |
| ENSG00000189136 | UBE2Q2P1   | -1.5                          | 0.00088 | 0.00317 | 6.490    | 1.270      | 4.591   | 7.257   | 10.242  | 1.123     | 9.132  | 11.209 |
| ENSG00000100271 | TTLL1      | -1.5                          | 8.3E-05 | 0.00042 | 8.918    | 1.602      | 6.705   | 10.297  | 12.537  | 0.954     | 11.320 | 13.651 |
| ENSG00000182463 | TSHZ2      | -1.5                          | 1.7E-06 | 1.4E-05 | 2.626    | 0.300      | 2.248   | 2.983   | 3.906   | 0.106     | 3.783  | 3.995  |
| ENSG00000155428 | TRIM74     | -1.5                          | 0.01194 | 0.02844 | 1.588    | 0.227      | 1.369   | 1.834   | 2.546   | 0.368     | 2.060  | 2.955  |
| ENSG00000071575 | TRIB2      | -1.5                          | 2.6E-08 | 3.4E-07 | 13.874   | 1.231      | 12.885  | 15.546  | 19.685  | 0.563     | 18.968 | 20.134 |
| ENSG00000230359 | TPI1P2     | -1.5                          | 0.02483 | 0.05234 | 2.736    | 1.198      | 1.024   | 3.813   | 4.254   | 0.392     | 3.831  | 4.588  |
| ENSG00000271092 | TMEM56-RV  | -1.5                          | 0.02865 | 0.05878 | 1.275    | 0.384      | 0.729   | 1.621   | 1.987   | 0.379     | 1.560  | 2.483  |
| ENSG00000228158 | TLE1P1     | -1.5                          | 0.0004  | 0.00163 | 12.609   | 1.810      | 9.983   | 14.132  | 19.977  | 1.084     | 19.096 | 21.316 |
| ENSG00000251022 | THAP9-AS1  | -1.5                          | 2.8E-07 | 2.9E-06 | 31.932   | 4.772      | 25.047  | 36.036  | 49.855  | 5.136     | 44.441 | 54.244 |
| ENSG00000229950 | TFAP2A-AS1 | -1.5                          | 0.00348 | 0.01013 | 2.924    | 0.768      | 2.250   | 3.832   | 4.448   | 0.416     | 4.085  | 4.809  |
| ENSG00000137203 | TFAP2A     | -1.5                          | 1E-07   | 1.2E-06 | 4.385    | 0.324      | 4.027   | 4.754   | 6.438   | 0.121     | 6.306  | 6.540  |
| ENSG00000168769 | TET2       | -1.5                          | 4E-05   | 0.00023 | 6.466    | 1.209      | 4.659   | 7.211   | 9.900   | 0.996     | 8.944  | 10.759 |
| ENSG00000218336 | TENM3      | -1.5                          | 2.8E-09 | 4.8E-08 | 24.557   | 2.702      | 20.530  | 26.244  | 37.294  | 1.636     | 35.059 | 38.517 |
| ENSG00000148737 | TCF7L2     | -1.5                          | 4.1E-08 | 5.1E-07 | 10.552   | 0.880      | 9.789   | 11.638  | 16.150  | 0.713     | 15.727 | 17.210 |

|                 |             |      |          |          |         |        |         |         |         |       |         |         |
|-----------------|-------------|------|----------|----------|---------|--------|---------|---------|---------|-------|---------|---------|
| ENSG00000196628 | TCF4        | -1.5 | 4.6E-07  | 4.5E-06  | 2.838   | 0.464  | 2.176   | 3.209   | 4.148   | 0.241 | 3.933   | 4.357   |
| ENSG00000176896 | TCEANC      | -1.5 | 0.00027  | 0.00117  | 2.035   | 0.234  | 1.690   | 2.213   | 3.099   | 0.549 | 2.522   | 3.568   |
| ENSG00000177565 | TBL1XR1     | -1.5 | 0.00018  | 0.00084  | 18.476  | 3.944  | 12.710  | 21.084  | 28.339  | 2.119 | 26.191  | 30.160  |
| ENSG00000101463 | SYNDIG1     | -1.5 | 0.00018  | 0.00084  | 4.763   | 0.664  | 4.187   | 5.694   | 6.815   | 0.547 | 6.124   | 7.463   |
| ENSG00000254995 | STX16-NPEPI | -1.5 | 0.00396  | 0.01128  | 1.185   | 0.237  | 1.026   | 1.529   | 1.962   | 0.516 | 1.384   | 2.398   |
| ENSG00000242866 | STRC        | -1.5 | 0.02798  | 0.05766  | 0.246   | 0.027  | 0.208   | 0.267   | 0.377   | 0.107 | 0.236   | 0.460   |
| ENSG00000260589 | STAM-AS1    | -1.5 | 0.00323  | 0.00952  | 2.279   | 0.506  | 1.531   | 2.612   | 3.410   | 0.499 | 2.663   | 3.689   |
| ENSG00000263465 | SRSF8       | -1.5 | 8.35E-12 | 2.70E-10 | 41.999  | 1.956  | 39.099  | 43.245  | 62.406  | 0.375 | 62.144  | 62.939  |
| ENSG00000110693 | SOX6        | -1.5 | 7.6E-08  | 9E-07    | 2.729   | 0.415  | 2.177   | 3.114   | 4.199   | 0.210 | 3.910   | 4.355   |
| ENSG00000145147 | SLIT2       | -1.5 | 3.2E-09  | 5.4E-08  | 87.065  | 8.358  | 76.351  | 95.869  | 127.111 | 3.702 | 123.806 | 130.316 |
| ENSG00000134294 | SLC38A2     | -1.5 | 3.6E-05  | 0.00021  | 156.761 | 27.425 | 116.843 | 179.325 | 227.095 | 7.191 | 216.333 | 231.021 |
| ENSG00000253598 | SLC10A5     | -1.5 | 0.03098  | 0.06265  | 0.798   | 0.168  | 0.619   | 1.002   | 1.270   | 0.352 | 0.752   | 1.491   |
| ENSG00000116991 | SIPA1L2     | -1.5 | 6.91E-10 | 1.4E-08  | 13.432  | 1.026  | 11.959  | 14.253  | 19.985  | 1.038 | 18.959  | 20.879  |
| ENSG00000112246 | SIM1        | -1.5 | 0.00037  | 0.00152  | 3.501   | 0.839  | 2.279   | 4.112   | 5.344   | 0.515 | 4.669   | 5.746   |
| ENSG00000168779 | SHOX2       | -1.5 | 1.2E-06  | 1E-05    | 5.536   | 0.566  | 5.141   | 6.360   | 8.197   | 0.800 | 7.019   | 8.696   |
| ENSG00000137872 | SEMA6D      | -1.5 | 0.0008   | 0.00292  | 1.015   | 0.262  | 0.780   | 1.326   | 1.582   | 0.192 | 1.336   | 1.734   |
| ENSG00000151967 | SCHIP1      | -1.5 | 0.0011   | 0.00385  | 0.918   | 0.185  | 0.728   | 1.109   | 1.234   | 0.118 | 1.148   | 1.397   |
| ENSG00000124813 | RUNX2       | -1.5 | 8.1E-05  | 0.00042  | 3.264   | 0.256  | 2.910   | 3.510   | 4.906   | 0.381 | 4.480   | 5.407   |
| ENSG00000108309 | RUNDC3A     | -1.5 | 0.00448  | 0.01252  | 0.986   | 0.119  | 0.833   | 1.118   | 1.455   | 0.321 | 1.281   | 1.936   |
| ENSG00000230364 | RPL4P3      | -1.5 | 0.02396  | 0.05086  | 2.604   | 1.113  | 1.859   | 4.252   | 3.564   | 0.125 | 3.385   | 3.651   |
| ENSG00000185483 | ROR1        | -1.5 | 1.8E-08  | 2.5E-07  | 6.891   | 0.683  | 6.059   | 7.640   | 10.323  | 0.332 | 9.924   | 10.596  |
| ENSG00000115841 | RMDN2       | -1.5 | 0.00288  | 0.00864  | 1.736   | 0.652  | 0.927   | 2.523   | 2.537   | 0.177 | 2.330   | 2.764   |
| ENSG00000141314 | RHBDL3      | -1.5 | 1.6E-06  | 1.3E-05  | 5.561   | 0.662  | 4.823   | 6.409   | 7.916   | 0.552 | 7.209   | 8.355   |
| ENSG00000232104 | RFX3-AS1    | -1.5 | 0.08125  | 0.13907  | 1.332   | 0.689  | 0.712   | 2.228   | 2.016   | 0.522 | 1.408   | 2.451   |
| ENSG00000248643 | RBM14-RBM   | -1.5 | 0.00112  | 0.00392  | 2.338   | 0.183  | 2.097   | 2.541   | 3.679   | 0.375 | 3.170   | 3.962   |
| ENSG00000122257 | RBBP6       | -1.5 | 5.5E-06  | 4E-05    | 27.596  | 4.936  | 20.314  | 31.225  | 40.743  | 1.511 | 39.434  | 42.051  |
| ENSG00000123094 | RASSF8      | -1.5 | 0.00035  | 0.00144  | 20.491  | 4.300  | 14.371  | 24.134  | 29.179  | 2.275 | 26.617  | 31.095  |
| ENSG00000171522 | PTGER4      | -1.5 | 2.5E-05  | 0.00015  | 2.736   | 0.402  | 2.384   | 3.248   | 4.141   | 0.272 | 3.779   | 4.350   |
| ENSG00000111215 | PRR4        | -1.5 | 0.01962  | 0.04315  | 1.201   | 0.516  | 0.630   | 1.850   | 1.988   | 0.451 | 1.505   | 2.373   |
| ENSG00000185532 | PRKG1       | -1.5 | 3.1E-07  | 3.2E-06  | 5.064   | 0.701  | 4.086   | 5.599   | 7.282   | 0.165 | 7.141   | 7.449   |
| ENSG00000106536 | POU6F2      | -1.5 | 0.00019  | 0.00089  | 1.126   | 0.094  | 1.055   | 1.255   | 1.647   | 0.241 | 1.439   | 1.877   |
| ENSG00000214783 | POLR2J4     | -1.5 | 0.0004   | 0.00164  | 1.192   | 0.207  | 0.988   | 1.421   | 1.759   | 0.070 | 1.702   | 1.846   |
| ENSG00000240694 | PNMA2       | -1.5 | 1.1E-08  | 1.6E-07  | 9.830   | 0.865  | 8.844   | 10.796  | 14.470  | 0.666 | 14.050  | 15.465  |
| ENSG00000136040 | PLXNC1      | -1.5 | 0.01552  | 0.03552  | 0.558   | 0.248  | 0.257   | 0.811   | 0.903   | 0.118 | 0.763   | 1.000   |
| ENSG00000162407 | PLPP3       | -1.5 | 4.2E-07  | 4.1E-06  | 7.456   | 0.541  | 7.014   | 8.196   | 10.972  | 0.394 | 10.719  | 11.560  |
| ENSG00000182621 | PLCB1       | -1.5 | 8.2E-05  | 0.00042  | 7.697   | 1.526  | 5.458   | 8.718   | 11.316  | 0.582 | 10.788  | 11.820  |
| ENSG00000105499 | PLA2G4C     | -1.5 | 6.7E-05  | 0.00035  | 2.292   | 0.488  | 1.805   | 2.932   | 3.446   | 0.421 | 2.874   | 3.764   |
| ENSG00000171033 | PKIA        | -1.5 | 1.9E-06  | 1.5E-05  | 6.491   | 0.938  | 5.202   | 7.441   | 10.010  | 0.373 | 9.507   | 10.293  |

|                 |             |      |          |         |         |        |         |         |         |       |         |         |
|-----------------|-------------|------|----------|---------|---------|--------|---------|---------|---------|-------|---------|---------|
| ENSG00000145675 | PIK3R1      | -1.5 | 0.00026  | 0.00113 | 7.654   | 1.660  | 5.240   | 9.020   | 11.633  | 1.067 | 10.563  | 12.550  |
| ENSG00000134853 | PDGFRA      | -1.5 | 0.00633  | 0.01672 | 0.972   | 0.135  | 0.845   | 1.090   | 1.491   | 0.256 | 1.130   | 1.672   |
| ENSG00000145431 | PDGFC       | -1.5 | 1.3E-09  | 2.5E-08 | 15.361  | 1.332  | 13.639  | 16.890  | 23.141  | 0.615 | 22.218  | 23.451  |
| ENSG00000168300 | PCMTD1      | -1.5 | 0.00044  | 0.00177 | 13.185  | 2.857  | 9.364   | 16.047  | 19.661  | 2.541 | 17.255  | 21.857  |
| ENSG00000240764 | PCDHGC5     | -1.5 | 0.06583  | 0.11692 | 0.261   | 0.071  | 0.182   | 0.350   | 0.456   | 0.099 | 0.315   | 0.548   |
| ENSG00000253731 | PCDHGA6     | -1.5 | 0.00022  | 0.00098 | 1.502   | 0.288  | 1.276   | 1.881   | 2.352   | 0.291 | 2.089   | 2.604   |
| ENSG00000113212 | PCDHB7      | -1.5 | 0.00023  | 0.00102 | 2.730   | 0.466  | 2.116   | 3.247   | 3.973   | 0.168 | 3.748   | 4.156   |
| ENSG00000113205 | PCDHB3      | -1.5 | 0.00223  | 0.00704 | 1.520   | 0.189  | 1.344   | 1.788   | 2.525   | 0.611 | 1.915   | 3.051   |
| ENSG00000187372 | PCDHB13     | -1.5 | 1.8E-06  | 1.5E-05 | 6.522   | 0.663  | 5.627   | 7.095   | 9.596   | 0.117 | 9.439   | 9.684   |
| ENSG00000120324 | PCDHB10     | -1.5 | 8.1E-06  | 5.7E-05 | 5.429   | 0.412  | 4.947   | 5.954   | 7.907   | 0.593 | 7.070   | 8.469   |
| ENSG00000204962 | PCDHA8      | -1.5 | 0.00357  | 0.01034 | 0.981   | 0.165  | 0.754   | 1.144   | 1.396   | 0.261 | 1.059   | 1.603   |
| ENSG00000223891 | OSER1-AS1   | -1.5 | 0.00051  | 0.002   | 5.548   | 0.642  | 4.708   | 6.252   | 7.830   | 0.650 | 7.298   | 8.623   |
| ENSG00000180530 | NRIP1       | -1.5 | 4.8E-05  | 0.00026 | 9.083   | 1.844  | 6.340   | 10.306  | 13.684  | 1.290 | 12.408  | 14.795  |
| ENSG00000153234 | NR4A2       | -1.5 | 0.0022   | 0.00696 | 1.594   | 0.312  | 1.300   | 2.022   | 2.207   | 0.203 | 1.907   | 2.333   |
| ENSG00000185551 | NR2F2       | -1.5 | 5.2E-09  | 8.3E-08 | 18.481  | 1.577  | 16.552  | 19.846  | 26.438  | 1.071 | 25.793  | 28.041  |
| ENSG00000174738 | NR1D2       | -1.5 | 4.7E-07  | 4.5E-06 | 31.949  | 5.435  | 24.193  | 36.293  | 48.209  | 2.575 | 45.026  | 50.302  |
| ENSG00000168743 | NPNT        | -1.5 | 3.1E-07  | 3.1E-06 | 17.742  | 2.570  | 14.419  | 20.386  | 26.715  | 2.578 | 24.051  | 28.924  |
| ENSG00000255524 | NPIP8       | -1.5 | 0.02907  | 0.05954 | 0.949   | 0.135  | 0.864   | 1.150   | 1.341   | 0.130 | 1.269   | 1.535   |
| ENSG00000173614 | NMNAT1      | -1.5 | 2.9E-06  | 2.2E-05 | 6.105   | 0.690  | 5.253   | 6.895   | 8.838   | 0.592 | 8.340   | 9.507   |
| ENSG00000177453 | NIM1K       | -1.5 | 0.04421  | 0.08421 | 0.683   | 0.186  | 0.571   | 0.962   | 0.924   | 0.110 | 0.838   | 1.067   |
| ENSG00000140396 | NCOA2       | -1.5 | 0.00039  | 0.00159 | 17.087  | 3.629  | 11.666  | 19.306  | 24.369  | 0.507 | 23.616  | 24.723  |
| ENSG00000186310 | NAP1L3      | -1.5 | 1.5E-05  | 9.6E-05 | 4.968   | 0.498  | 4.276   | 5.417   | 7.486   | 0.729 | 6.667   | 8.101   |
| ENSG00000188613 | NANOS1      | -1.5 | 1.6E-07  | 1.8E-06 | 6.633   | 0.219  | 6.442   | 6.884   | 9.617   | 0.394 | 9.111   | 9.929   |
| ENSG00000281026 | N4BP2L2-IT2 | -1.5 | 0.00229  | 0.00719 | 1.132   | 0.334  | 0.780   | 1.547   | 1.702   | 0.259 | 1.448   | 1.925   |
| ENSG00000166866 | MYO1A       | -1.5 | 0.00832  | 0.02107 | 0.591   | 0.106  | 0.466   | 0.721   | 0.978   | 0.162 | 0.798   | 1.114   |
| ENSG00000059728 | MXD1        | -1.5 | 2E-08    | 2.7E-07 | 7.012   | 0.771  | 5.880   | 7.611   | 10.383  | 0.195 | 10.190  | 10.551  |
| ENSG00000262902 | MTCO1P40    | -1.5 | 0.00094  | 0.00335 | 9.640   | 0.839  | 8.920   | 10.807  | 14.479  | 1.919 | 12.838  | 17.255  |
| ENSG00000262454 | MIR193BHG   | -1.5 | 0.02879  | 0.05903 | 1.701   | 0.652  | 0.766   | 2.283   | 2.547   | 0.194 | 2.257   | 2.660   |
| ENSG00000221184 | MIR1254-1   | -1.5 | 0.0536   | 0.09862 | 23.572  | 10.497 | 7.850   | 29.490  | 39.060  | 8.819 | 25.910  | 44.804  |
| ENSG00000233325 | MIPEPP3     | -1.5 | 0.05737  | 0.10433 | 2.788   | 0.868  | 1.962   | 3.864   | 4.004   | 0.642 | 3.620   | 4.957   |
| ENSG00000203740 | METTL11B    | -1.5 | 0.01551  | 0.03552 | 2.342   | 0.062  | 2.263   | 2.403   | 3.208   | 0.499 | 2.783   | 3.743   |
| ENSG00000134138 | MEIS2       | -1.5 | 4E-08    | 5E-07   | 4.388   | 0.480  | 3.738   | 4.831   | 6.368   | 0.072 | 6.309   | 6.455   |
| ENSG00000102316 | MAGED2      | -1.5 | 5.34E-10 | 1.1E-08 | 275.826 | 12.229 | 267.236 | 293.947 | 387.932 | 7.261 | 379.853 | 397.511 |
| ENSG00000188993 | LRRRC66     | -1.5 | 0.00196  | 0.00632 | 1.561   | 0.248  | 1.196   | 1.739   | 2.456   | 0.356 | 1.936   | 2.685   |
| ENSG00000185158 | LRRRC37B    | -1.5 | 2E-07    | 2.1E-06 | 6.182   | 0.636  | 5.440   | 6.839   | 9.276   | 0.783 | 8.536   | 9.953   |
| ENSG00000230069 | LRRRC37A15P | -1.5 | 0.0215   | 0.0465  | 2.337   | 0.452  | 1.675   | 2.698   | 3.288   | 0.471 | 2.613   | 3.710   |
| ENSG00000163431 | LMOD1       | -1.5 | 6E-05    | 0.00032 | 2.963   | 0.354  | 2.646   | 3.468   | 4.412   | 0.371 | 4.098   | 4.824   |
| ENSG00000239335 | LLPH-AS1    | -1.5 | 0.01358  | 0.03177 | 5.738   | 1.441  | 3.708   | 6.860   | 8.993   | 0.789 | 7.955   | 9.876   |

|                 |           |      |          |         |         |       |         |         |         |       |         |         |
|-----------------|-----------|------|----------|---------|---------|-------|---------|---------|---------|-------|---------|---------|
| ENSG00000246876 | LINC02466 | -1.5 | 0.01213  | 0.0288  | 1.579   | 0.259 | 1.240   | 1.860   | 2.356   | 0.633 | 1.535   | 3.080   |
| ENSG00000267767 | LINC01801 | -1.5 | 0.00124  | 0.00425 | 3.081   | 0.657 | 2.621   | 4.032   | 4.531   | 0.417 | 3.907   | 4.783   |
| ENSG00000179935 | LINC00652 | -1.5 | 0.00011  | 0.00055 | 2.365   | 0.254 | 2.059   | 2.644   | 3.343   | 0.035 | 3.295   | 3.379   |
| ENSG00000245526 | LINC00461 | -1.5 | 0.01418  | 0.03296 | 0.978   | 0.450 | 0.592   | 1.623   | 1.470   | 0.240 | 1.121   | 1.628   |
| ENSG00000203441 | LINC00449 | -1.5 | 0.01191  | 0.02839 | 3.406   | 0.526 | 3.098   | 4.191   | 4.656   | 0.322 | 4.391   | 5.044   |
| ENSG00000224843 | LINC00240 | -1.5 | 0.03001  | 0.06108 | 0.514   | 0.159 | 0.392   | 0.747   | 0.734   | 0.094 | 0.668   | 0.867   |
| ENSG00000111052 | LIN7A     | -1.5 | 1.2E-05  | 7.8E-05 | 2.813   | 0.408 | 2.222   | 3.096   | 4.158   | 0.585 | 3.316   | 4.555   |
| ENSG00000172086 | KRCC1     | -1.5 | 1.1E-08  | 1.6E-07 | 34.697  | 3.683 | 29.282  | 37.530  | 51.110  | 2.044 | 49.194  | 52.876  |
| ENSG00000227268 | KLLN      | -1.5 | 1.7E-05  | 0.00011 | 4.258   | 0.413 | 3.641   | 4.494   | 6.316   | 0.950 | 5.142   | 7.087   |
| ENSG00000109787 | KLF3      | -1.5 | 7.2E-09  | 1.1E-07 | 29.365  | 2.636 | 25.994  | 31.805  | 43.112  | 1.790 | 40.567  | 44.363  |
| ENSG00000250305 | KIAA1456  | -1.5 | 0.00038  | 0.00155 | 0.976   | 0.194 | 0.715   | 1.184   | 1.499   | 0.058 | 1.414   | 1.534   |
| ENSG00000115548 | KDM3A     | -1.5 | 9.8E-09  | 1.5E-07 | 16.347  | 1.858 | 13.769  | 18.062  | 23.071  | 1.030 | 22.094  | 23.961  |
| ENSG00000120696 | KBTBD7    | -1.5 | 2.1E-08  | 2.8E-07 | 16.788  | 1.696 | 14.519  | 18.542  | 23.759  | 1.324 | 22.563  | 24.905  |
| ENSG00000177606 | JUN       | -1.5 | 9.29E-10 | 1.8E-08 | 98.631  | 6.059 | 91.710  | 106.485 | 141.456 | 1.989 | 138.844 | 143.685 |
| ENSG00000008083 | JARID2    | -1.5 | 2.28E-10 | 5.1E-09 | 28.882  | 1.611 | 26.685  | 30.552  | 43.356  | 1.796 | 41.091  | 44.798  |
| ENSG00000176049 | JAKMIP2   | -1.5 | 2.3E-07  | 2.4E-06 | 5.308   | 0.777 | 4.215   | 5.993   | 7.678   | 0.244 | 7.341   | 7.926   |
| ENSG00000077684 | JADE1     | -1.5 | 2.4E-09  | 4.3E-08 | 15.465  | 1.492 | 13.291  | 16.669  | 22.190  | 1.291 | 20.850  | 23.296  |
| ENSG00000105855 | ITGB8     | -1.5 | 0.00013  | 0.00064 | 3.134   | 0.708 | 2.097   | 3.598   | 4.674   | 0.378 | 4.301   | 5.000   |
| ENSG00000105655 | ISYNA1    | -1.5 | 1.3E-09  | 2.4E-08 | 109.259 | 4.606 | 102.670 | 112.996 | 154.203 | 1.426 | 152.288 | 155.742 |
| ENSG00000185950 | IRS2      | -1.5 | 1.5E-09  | 2.8E-08 | 13.044  | 1.005 | 12.014  | 13.929  | 19.365  | 0.293 | 19.114  | 19.669  |
| ENSG00000168264 | IRF2BP2   | -1.5 | 4.22E-11 | 1.1E-09 | 49.182  | 3.191 | 46.295  | 52.379  | 74.730  | 0.148 | 74.517  | 74.860  |
| ENSG00000250492 | INTS6P1   | -1.5 | 0.00128  | 0.00438 | 1.644   | 0.171 | 1.427   | 1.836   | 2.504   | 0.405 | 2.018   | 2.838   |
| ENSG00000168918 | INPP5D    | -1.5 | 8.91E-10 | 1.7E-08 | 9.968   | 0.331 | 9.491   | 10.254  | 15.237  | 0.198 | 15.001  | 15.401  |
| ENSG00000099377 | HSD3B7    | -1.5 | 0.00031  | 0.00132 | 2.991   | 0.245 | 2.669   | 3.190   | 4.499   | 0.149 | 4.412   | 4.722   |
| ENSG00000125430 | HS3ST3B1  | -1.5 | 1.2E-06  | 1.1E-05 | 6.125   | 0.545 | 5.448   | 6.753   | 8.777   | 0.147 | 8.695   | 8.997   |
| ENSG00000135547 | HEY2      | -1.5 | 0.00018  | 0.00082 | 5.231   | 0.920 | 4.583   | 6.552   | 7.118   | 0.440 | 6.752   | 7.634   |
| ENSG00000253203 | GUSBP3    | -1.5 | 0.00072  | 0.00268 | 3.718   | 0.488 | 3.212   | 4.381   | 5.607   | 0.451 | 5.017   | 5.959   |
| ENSG00000123201 | GUCY1B2   | -1.5 | 0.01501  | 0.03453 | 1.186   | 0.299 | 0.744   | 1.388   | 1.696   | 0.378 | 1.189   | 1.984   |
| ENSG00000196275 | GTF2IRD2  | -1.5 | 0.00139  | 0.0047  | 0.748   | 0.127 | 0.634   | 0.926   | 1.030   | 0.132 | 0.956   | 1.228   |
| ENSG00000046653 | GPM6B     | -1.5 | 2E-05    | 0.00012 | 2.870   | 0.438 | 2.268   | 3.220   | 4.210   | 0.237 | 3.971   | 4.414   |
| ENSG00000278175 | GLIDR     | -1.5 | 7E-06    | 5E-05   | 3.361   | 0.295 | 3.109   | 3.676   | 5.006   | 0.486 | 4.390   | 5.396   |
| ENSG00000106571 | GLI3      | -1.5 | 1.7E-08  | 2.3E-07 | 11.589  | 0.562 | 10.879  | 12.253  | 17.970  | 0.810 | 16.900  | 18.598  |
| ENSG00000164949 | GEM       | -1.5 | 1.5E-06  | 1.3E-05 | 9.583   | 1.226 | 8.682   | 11.373  | 13.755  | 0.525 | 13.130  | 14.415  |
| ENSG00000164404 | GDF9      | -1.5 | 0.02164  | 0.04672 | 0.934   | 0.302 | 0.533   | 1.258   | 1.444   | 0.342 | 0.982   | 1.703   |
| ENSG00000174804 | FZD4      | -1.5 | 2.9E-07  | 3E-06   | 13.816  | 1.646 | 11.602  | 15.529  | 19.403  | 1.016 | 18.757  | 20.893  |
| ENSG00000106701 | FSD1L     | -1.5 | 0.00082  | 0.00301 | 5.177   | 1.034 | 3.636   | 5.804   | 8.002   | 1.773 | 6.111   | 9.514   |
| ENSG00000053254 | FOXN3     | -1.5 | 4.30E-10 | 9E-09   | 15.517  | 1.344 | 13.864  | 17.098  | 22.293  | 0.435 | 21.648  | 22.555  |
| ENSG00000118407 | FILIP1    | -1.5 | 6.5E-05  | 0.00034 | 1.493   | 0.247 | 1.178   | 1.761   | 2.052   | 0.043 | 2.024   | 2.115   |

|                 |             |      |          |          |        |        |        |        |        |        |        |         |
|-----------------|-------------|------|----------|----------|--------|--------|--------|--------|--------|--------|--------|---------|
| ENSG00000176971 | FIBIN       | -1.5 | 0.00016  | 0.00077  | 5.240  | 0.980  | 4.182  | 6.169  | 7.189  | 0.889  | 6.421  | 8.024   |
| ENSG00000168143 | FAM83B      | -1.5 | 1.9E-05  | 0.00012  | 7.530  | 1.264  | 5.771  | 8.704  | 10.776 | 0.476  | 10.428 | 11.436  |
| ENSG00000145945 | FAM50B      | -1.5 | 5.7E-05  | 0.00031  | 6.232  | 0.442  | 5.640  | 6.581  | 9.116  | 0.936  | 7.724  | 9.748   |
| ENSG00000112773 | FAM46A      | -1.5 | 6.1E-06  | 4.4E-05  | 5.097  | 0.724  | 4.227  | 5.736  | 7.215  | 0.260  | 6.834  | 7.380   |
| ENSG00000235618 | FAM21EP     | -1.5 | 0.00662  | 0.01738  | 1.108  | 0.150  | 0.975  | 1.325  | 1.651  | 0.303  | 1.491  | 2.105   |
| ENSG00000186973 | FAM183A     | -1.5 | 0.00768  | 0.0197   | 4.259  | 0.983  | 3.071  | 5.467  | 6.568  | 1.165  | 5.404  | 7.570   |
| ENSG00000248019 | FAM13A-AS1  | -1.5 | 0.00677  | 0.01772  | 0.715  | 0.159  | 0.493  | 0.844  | 1.122  | 0.174  | 0.871  | 1.238   |
| ENSG00000145242 | EPHA5       | -1.5 | 1.6E-05  | 0.0001   | 2.034  | 0.329  | 1.552  | 2.293  | 2.847  | 0.106  | 2.732  | 2.937   |
| ENSG00000224032 | EPB41L4A-A' | -1.5 | 5.7E-09  | 9E-08    | 18.339 | 0.418  | 17.852 | 18.872 | 25.747 | 0.633  | 24.849 | 26.192  |
| ENSG00000184349 | EFNA5       | -1.5 | 2E-08    | 2.7E-07  | 9.975  | 0.742  | 9.307  | 10.907 | 14.421 | 0.455  | 13.744 | 14.733  |
| ENSG00000186976 | EFCAB6      | -1.5 | 9.2E-05  | 0.00046  | 1.418  | 0.197  | 1.207  | 1.680  | 2.071  | 0.060  | 1.983  | 2.107   |
| ENSG00000245205 | EEF1A1P4    | -1.5 | 0.00105  | 0.00368  | 5.663  | 0.951  | 4.386  | 6.673  | 7.892  | 0.723  | 6.811  | 8.330   |
| ENSG00000179532 | DNHD1       | -1.5 | 4.9E-06  | 3.7E-05  | 1.495  | 0.174  | 1.279  | 1.681  | 2.378  | 0.363  | 2.017  | 2.690   |
| ENSG00000176124 | DLEU1       | -1.5 | 7.8E-06  | 5.4E-05  | 1.399  | 0.151  | 1.194  | 1.558  | 2.003  | 0.046  | 1.971  | 2.068   |
| ENSG00000204311 | DFNB59      | -1.5 | 0.00076  | 0.00282  | 2.214  | 0.430  | 1.876  | 2.835  | 3.164  | 0.336  | 2.686  | 3.474   |
| ENSG00000134574 | DDB2        | -1.5 | 2.78E-11 | 7.71E-10 | 65.925 | 0.636  | 65.198 | 66.657 | 98.379 | 3.799  | 92.710 | 100.539 |
| ENSG00000186529 | CYP4F3      | -1.5 | 0.00112  | 0.00391  | 1.113  | 0.207  | 0.868  | 1.372  | 1.724  | 0.119  | 1.546  | 1.793   |
| ENSG00000138161 | CUZD1       | -1.5 | 7.2E-05  | 0.00038  | 4.276  | 0.622  | 3.624  | 5.063  | 5.789  | 0.733  | 5.250  | 6.802   |
| ENSG00000077063 | CTTNBP2     | -1.5 | 1.2E-06  | 1.1E-05  | 3.317  | 0.321  | 3.076  | 3.767  | 4.719  | 0.175  | 4.599  | 4.979   |
| ENSG00000178662 | CSRNP3      | -1.5 | 0.00021  | 0.00095  | 2.797  | 0.646  | 1.897  | 3.321  | 4.200  | 0.376  | 3.800  | 4.520   |
| ENSG00000143578 | CREB3L4     | -1.5 | 2.9E-05  | 0.00017  | 9.229  | 0.594  | 8.496  | 9.850  | 13.509 | 0.767  | 13.020 | 14.633  |
| ENSG00000106034 | CPED1       | -1.5 | 0.00732  | 0.01894  | 0.721  | 0.189  | 0.521  | 0.968  | 0.992  | 0.094  | 0.911  | 1.081   |
| ENSG00000214575 | CPEB1       | -1.5 | 4.2E-05  | 0.00023  | 2.231  | 0.229  | 2.021  | 2.476  | 3.378  | 0.263  | 3.017  | 3.573   |
| ENSG00000080573 | COL5A3      | -1.5 | 0.01405  | 0.0327   | 0.453  | 0.096  | 0.327  | 0.561  | 0.707  | 0.149  | 0.548  | 0.908   |
| ENSG00000011021 | CLCN6       | -1.5 | 7.7E-07  | 7E-06    | 7.567  | 0.577  | 7.078  | 8.376  | 10.832 | 0.525  | 10.046 | 11.117  |
| ENSG00000164442 | CITED2      | -1.5 | 2.4E-09  | 4.3E-08  | 45.435 | 2.354  | 42.413 | 48.146 | 66.056 | 1.195  | 65.263 | 67.790  |
| ENSG00000183196 | CHST6       | -1.5 | 6.1E-05  | 0.00033  | 0.979  | 0.100  | 0.882  | 1.096  | 1.447  | 0.115  | 1.349  | 1.614   |
| ENSG00000111860 | CEP85L      | -1.5 | 0.00019  | 0.00087  | 6.732  | 1.587  | 4.468  | 8.109  | 10.077 | 0.814  | 8.999  | 10.707  |
| ENSG00000135315 | CEP162      | -1.5 | 0.02286  | 0.04893  | 8.661  | 3.106  | 4.006  | 10.312 | 12.903 | 1.519  | 11.019 | 14.135  |
| ENSG00000117724 | CENPF       | -1.5 | 0.0646   | 0.11512  | 57.903 | 21.623 | 25.748 | 71.338 | 85.800 | 10.949 | 73.945 | 95.110  |
| ENSG00000048740 | CELF2       | -1.5 | 7.7E-07  | 7.1E-06  | 10.506 | 1.824  | 7.962  | 12.228 | 15.683 | 0.673  | 14.912 | 16.248  |
| ENSG00000147883 | CDKN2B      | -1.5 | 1.9E-09  | 3.4E-08  | 16.268 | 0.837  | 15.293 | 17.304 | 23.535 | 0.566  | 22.986 | 24.329  |
| ENSG00000163171 | CDC42EP3    | -1.5 | 2.1E-09  | 3.7E-08  | 15.216 | 1.185  | 13.455 | 15.925 | 21.557 | 0.927  | 20.514 | 22.338  |
| ENSG00000184305 | CCSER1      | -1.5 | 0.00116  | 0.00402  | 0.682  | 0.187  | 0.503  | 0.929  | 0.969  | 0.078  | 0.864  | 1.054   |
| ENSG00000186409 | CCDC30      | -1.5 | 0.0002   | 0.00092  | 1.118  | 0.203  | 0.884  | 1.297  | 1.658  | 0.118  | 1.501  | 1.749   |
| ENSG00000104957 | CCDC130     | -1.5 | 3.3E-06  | 2.6E-05  | 13.968 | 0.974  | 13.401 | 15.426 | 19.694 | 1.856  | 18.091 | 21.470  |
| ENSG00000272168 | CASC15      | -1.5 | 0.00735  | 0.01899  | 0.295  | 0.014  | 0.275  | 0.307  | 0.381  | 0.046  | 0.331  | 0.420   |
| ENSG00000204682 | CASC10      | -1.5 | 6.3E-05  | 0.00033  | 5.082  | 0.451  | 4.567  | 5.654  | 6.922  | 0.629  | 6.422  | 7.728   |

|                 |            |      |          |         |         |       |         |         |         |        |         |         |
|-----------------|------------|------|----------|---------|---------|-------|---------|---------|---------|--------|---------|---------|
| ENSG00000145349 | CAMK2D     | -1.5 | 2.3E-08  | 3.1E-07 | 17.053  | 2.174 | 14.159  | 19.341  | 24.534  | 1.168  | 23.083  | 25.481  |
| ENSG00000183049 | CAMK1D     | -1.5 | 2.7E-07  | 2.8E-06 | 4.645   | 0.395 | 4.353   | 5.214   | 6.731   | 0.152  | 6.526   | 6.846   |
| ENSG00000153956 | CACNA2D1   | -1.5 | 6.5E-06  | 4.7E-05 | 9.577   | 1.473 | 7.426   | 10.697  | 14.363  | 1.335  | 13.024  | 15.511  |
| ENSG00000169239 | CA5B       | -1.5 | 7.1E-08  | 8.4E-07 | 5.678   | 0.310 | 5.265   | 6.004   | 8.370   | 0.400  | 8.060   | 8.899   |
| ENSG00000164743 | C8orf48    | -1.5 | 0.00053  | 0.00208 | 4.292   | 0.753 | 3.629   | 5.375   | 6.369   | 0.565  | 5.544   | 6.735   |
| ENSG00000164746 | C7orf57    | -1.5 | 0.0284   | 0.05839 | 1.100   | 0.238 | 0.908   | 1.425   | 1.381   | 0.635  | 0.842   | 2.071   |
| ENSG00000182326 | C1S        | -1.5 | 3E-06    | 2.4E-05 | 3.866   | 0.389 | 3.535   | 4.287   | 5.726   | 0.215  | 5.518   | 6.028   |
| ENSG00000143110 | C1orf162   | -1.5 | 0.00939  | 0.02333 | 1.222   | 0.252 | 0.919   | 1.476   | 1.810   | 0.265  | 1.512   | 2.156   |
| ENSG00000010671 | BTK        | -1.5 | 0.06188  | 0.11102 | 0.401   | 0.146 | 0.258   | 0.562   | 0.574   | 0.063  | 0.523   | 0.652   |
| ENSG00000183336 | BOLA2      | -1.5 | 0.00677  | 0.01772 | 1.672   | 0.189 | 1.532   | 1.948   | 2.450   | 0.373  | 2.143   | 2.993   |
| ENSG00000138696 | BMPR1B     | -1.5 | 1.9E-05  | 0.00012 | 4.883   | 0.533 | 4.255   | 5.440   | 7.439   | 0.978  | 5.993   | 8.038   |
| ENSG00000153094 | BCL2L11    | -1.5 | 1.1E-08  | 1.6E-07 | 14.123  | 1.201 | 12.627  | 15.116  | 21.028  | 0.240  | 20.762  | 21.230  |
| ENSG00000176788 | BASP1      | -1.5 | 3.00E-10 | 6.5E-09 | 181.933 | 9.009 | 174.752 | 194.976 | 269.107 | 11.216 | 259.495 | 280.689 |
| ENSG00000100852 | ARHGAP5    | -1.5 | 0.00082  | 0.00299 | 23.598  | 5.422 | 15.486  | 26.847  | 35.417  | 3.449  | 32.158  | 38.398  |
| ENSG00000004777 | ARHGAP33   | -1.5 | 0.00039  | 0.00159 | 3.595   | 0.308 | 3.194   | 3.942   | 5.278   | 0.307  | 5.017   | 5.722   |
| ENSG00000126016 | AMOT       | -1.5 | 2E-09    | 3.6E-08 | 16.013  | 1.811 | 13.832  | 17.957  | 24.517  | 0.885  | 23.609  | 25.276  |
| ENSG00000279355 | AGPAT4-IT1 | -1.5 | 0.02115  | 0.0459  | 1.712   | 0.736 | 0.846   | 2.579   | 2.735   | 0.079  | 2.657   | 2.803   |
| ENSG00000233435 | AGGF1P2    | -1.5 | 3.1E-05  | 0.00018 | 10.407  | 1.980 | 7.999   | 12.647  | 16.828  | 1.551  | 15.038  | 18.124  |
| ENSG00000214273 | AGGF1P1    | -1.5 | 2.3E-05  | 0.00014 | 5.811   | 1.088 | 4.536   | 6.911   | 8.943   | 0.717  | 8.250   | 9.562   |
| ENSG00000198221 | AFDN-AS1   | -1.5 | 0.00128  | 0.00438 | 1.820   | 0.262 | 1.538   | 2.128   | 2.764   | 0.028  | 2.726   | 2.793   |
| ENSG00000142303 | ADAMTS10   | -1.5 | 6.5E-07  | 6.1E-06 | 4.928   | 0.452 | 4.513   | 5.401   | 7.233   | 0.063  | 7.141   | 7.273   |
| ENSG00000241547 | ACTG1P20   | -1.5 | 0.01577  | 0.03599 | 5.226   | 1.128 | 3.735   | 6.298   | 7.362   | 2.735  | 5.113   | 10.662  |
| ENSG00000087085 | ACHE       | -1.5 | 0.00072  | 0.0027  | 3.210   | 0.474 | 2.571   | 3.706   | 4.977   | 0.984  | 3.581   | 5.894   |
| ENSG00000223764 |            | -1.5 | 2E-08    | 2.7E-07 | 16.606  | 1.118 | 15.368  | 18.031  | 24.183  | 1.869  | 21.788  | 25.668  |
| ENSG00000260293 |            | -1.5 | 5.1E-07  | 5E-06   | 5.086   | 0.540 | 4.487   | 5.631   | 7.919   | 0.749  | 7.079   | 8.551   |
| ENSG00000259943 |            | -1.5 | 3.8E-06  | 2.9E-05 | 12.317  | 0.930 | 10.932  | 12.865  | 17.444  | 0.423  | 16.819  | 17.704  |
| ENSG00000254815 |            | -1.5 | 9.6E-06  | 6.5E-05 | 5.900   | 0.391 | 5.324   | 6.196   | 9.169   | 0.810  | 7.988   | 9.699   |
| ENSG00000176593 |            | -1.5 | 1.4E-05  | 9.1E-05 | 2.744   | 0.589 | 2.333   | 3.617   | 4.129   | 0.141  | 3.986   | 4.323   |
| ENSG00000244627 |            | -1.5 | 1.7E-05  | 0.0001  | 4.270   | 0.309 | 4.003   | 4.716   | 6.481   | 0.399  | 5.976   | 6.801   |
| ENSG00000213976 |            | -1.5 | 4.4E-05  | 0.00024 | 5.812   | 1.071 | 4.324   | 6.622   | 8.593   | 0.144  | 8.418   | 8.771   |
| ENSG00000177822 |            | -1.5 | 4.6E-05  | 0.00025 | 2.920   | 0.512 | 2.204   | 3.353   | 4.076   | 0.181  | 3.849   | 4.292   |
| ENSG00000219665 |            | -1.5 | 5.6E-05  | 0.0003  | 2.141   | 0.292 | 1.902   | 2.563   | 2.983   | 0.244  | 2.817   | 3.334   |
| ENSG00000215158 |            | -1.5 | 7.6E-05  | 0.00039 | 4.269   | 0.932 | 3.288   | 5.527   | 6.529   | 0.793  | 5.490   | 7.148   |
| ENSG00000254701 |            | -1.5 | 7.7E-05  | 0.0004  | 14.652  | 2.248 | 12.194  | 17.422  | 23.115  | 1.942  | 20.372  | 24.491  |
| ENSG00000267506 |            | -1.5 | 0.00011  | 0.00056 | 1.721   | 0.166 | 1.533   | 1.915   | 2.720   | 0.137  | 2.607   | 2.884   |
| ENSG00000263745 |            | -1.5 | 0.00014  | 0.00065 | 2.360   | 0.366 | 2.050   | 2.871   | 3.525   | 0.425  | 2.895   | 3.781   |
| ENSG00000269399 |            | -1.5 | 0.00014  | 0.00068 | 4.985   | 0.431 | 4.455   | 5.447   | 7.080   | 0.244  | 6.768   | 7.364   |
| ENSG00000253366 |            | -1.5 | 0.00018  | 0.00085 | 10.327  | 1.615 | 8.602   | 12.504  | 15.913  | 1.910  | 13.718  | 17.512  |

|                 |      |         |         |        |       |        |        |        |       |        |        |
|-----------------|------|---------|---------|--------|-------|--------|--------|--------|-------|--------|--------|
| ENSG00000261116 | -1.5 | 0.0002  | 0.0009  | 5.929  | 1.274 | 4.111  | 7.046  | 8.676  | 0.463 | 8.045  | 9.160  |
| ENSG00000198237 | -1.5 | 0.00024 | 0.00104 | 10.386 | 1.507 | 8.870  | 12.473 | 15.896 | 1.949 | 13.696 | 17.537 |
| ENSG00000241288 | -1.5 | 0.00027 | 0.00116 | 1.901  | 0.103 | 1.802  | 2.036  | 3.041  | 0.396 | 2.450  | 3.263  |
| ENSG00000272301 | -1.5 | 0.00032 | 0.00135 | 12.504 | 0.748 | 11.564 | 13.215 | 18.804 | 1.675 | 16.655 | 20.748 |
| ENSG00000242622 | -1.5 | 0.00045 | 0.00181 | 3.526  | 0.323 | 3.193  | 3.932  | 4.921  | 0.316 | 4.511  | 5.282  |
| ENSG00000272870 | -1.5 | 0.00046 | 0.00184 | 2.365  | 0.112 | 2.229  | 2.503  | 3.511  | 0.303 | 3.226  | 3.773  |
| ENSG00000280239 | -1.5 | 0.00056 | 0.00216 | 3.084  | 0.528 | 2.479  | 3.733  | 4.430  | 0.243 | 4.250  | 4.765  |
| ENSG00000260966 | -1.5 | 0.00064 | 0.00243 | 2.785  | 0.451 | 2.114  | 3.078  | 4.056  | 0.928 | 2.896  | 4.805  |
| ENSG00000263412 | -1.5 | 0.00071 | 0.00266 | 1.945  | 0.206 | 1.713  | 2.211  | 2.715  | 0.132 | 2.579  | 2.829  |
| ENSG00000279520 | -1.5 | 0.00171 | 0.00561 | 5.517  | 1.119 | 3.972  | 6.632  | 8.044  | 0.635 | 7.725  | 8.996  |
| ENSG00000271109 | -1.5 | 0.00181 | 0.0059  | 6.161  | 0.745 | 5.473  | 7.010  | 9.128  | 0.115 | 8.955  | 9.190  |
| ENSG00000262877 | -1.5 | 0.00188 | 0.00609 | 3.551  | 0.399 | 3.148  | 4.087  | 5.066  | 0.425 | 4.517  | 5.554  |
| ENSG00000279369 | -1.5 | 0.00224 | 0.00705 | 3.338  | 0.561 | 2.788  | 4.091  | 4.999  | 0.804 | 4.148  | 5.685  |
| ENSG00000276728 | -1.5 | 0.0023  | 0.0072  | 3.115  | 0.469 | 2.608  | 3.743  | 4.852  | 0.496 | 4.241  | 5.455  |
| ENSG00000241764 | -1.5 | 0.00248 | 0.00766 | 3.399  | 0.763 | 2.786  | 4.460  | 5.141  | 0.494 | 4.470  | 5.513  |
| ENSG00000251432 | -1.5 | 0.00305 | 0.00906 | 1.778  | 0.418 | 1.210  | 2.110  | 2.427  | 0.247 | 2.284  | 2.795  |
| ENSG00000261578 | -1.5 | 0.00356 | 0.01033 | 1.117  | 0.088 | 1.017  | 1.230  | 1.443  | 0.116 | 1.344  | 1.611  |
| ENSG00000267284 | -1.5 | 0.00415 | 0.01176 | 3.593  | 0.946 | 2.809  | 4.877  | 5.291  | 0.354 | 4.825  | 5.566  |
| ENSG00000279673 | -1.5 | 0.00432 | 0.01214 | 2.035  | 0.398 | 1.481  | 2.392  | 2.882  | 0.205 | 2.578  | 3.007  |
| ENSG00000271918 | -1.5 | 0.00445 | 0.01245 | 2.716  | 0.399 | 2.444  | 3.295  | 4.060  | 0.572 | 3.610  | 4.899  |
| ENSG00000266490 | -1.5 | 0.0053  | 0.0144  | 10.123 | 2.674 | 8.256  | 14.086 | 15.435 | 1.250 | 13.600 | 16.230 |
| ENSG00000259366 | -1.5 | 0.00542 | 0.01466 | 12.363 | 3.268 | 8.061  | 15.901 | 17.251 | 2.628 | 13.944 | 19.364 |
| ENSG00000241170 | -1.5 | 0.00598 | 0.0159  | 1.935  | 0.275 | 1.556  | 2.187  | 3.119  | 0.371 | 2.732  | 3.437  |
| ENSG00000268670 | -1.5 | 0.00671 | 0.01759 | 4.812  | 1.007 | 4.094  | 6.273  | 7.102  | 0.698 | 6.354  | 7.697  |
| ENSG00000224046 | -1.5 | 0.00697 | 0.01815 | 3.441  | 0.611 | 2.744  | 4.116  | 4.981  | 0.668 | 4.599  | 5.982  |
| ENSG00000228395 | -1.5 | 0.00723 | 0.01875 | 2.019  | 0.525 | 1.408  | 2.575  | 3.015  | 0.439 | 2.698  | 3.629  |
| ENSG00000272195 | -1.5 | 0.00728 | 0.01885 | 1.774  | 0.133 | 1.576  | 1.864  | 2.632  | 0.164 | 2.407  | 2.800  |
| ENSG00000277383 | -1.5 | 0.00751 | 0.01935 | 5.726  | 1.557 | 3.798  | 7.373  | 8.415  | 0.413 | 8.021  | 8.772  |
| ENSG00000279873 | -1.5 | 0.00762 | 0.01956 | 2.538  | 0.756 | 1.665  | 3.402  | 4.185  | 0.020 | 4.168  | 4.205  |
| ENSG00000258472 | -1.5 | 0.0086  | 0.02168 | 0.808  | 0.148 | 0.705  | 1.026  | 1.126  | 0.090 | 1.025  | 1.202  |
| ENSG00000279511 | -1.5 | 0.00883 | 0.02217 | 1.574  | 0.504 | 0.847  | 1.989  | 2.398  | 0.119 | 2.231  | 2.512  |
| ENSG00000260461 | -1.5 | 0.00907 | 0.02263 | 1.160  | 0.233 | 0.932  | 1.481  | 1.869  | 0.197 | 1.710  | 2.157  |
| ENSG00000267546 | -1.5 | 0.01019 | 0.0249  | 2.331  | 0.669 | 1.733  | 2.978  | 3.573  | 0.930 | 2.734  | 4.378  |
| ENSG00000254165 | -1.5 | 0.01141 | 0.02737 | 3.120  | 0.789 | 2.694  | 4.302  | 4.892  | 0.639 | 4.092  | 5.408  |
| ENSG00000272630 | -1.5 | 0.01166 | 0.02788 | 1.127  | 0.351 | 0.608  | 1.360  | 1.641  | 0.394 | 1.327  | 2.143  |
| ENSG00000271971 | -1.5 | 0.01338 | 0.03137 | 7.631  | 1.722 | 5.614  | 9.664  | 12.768 | 3.334 | 9.185  | 15.607 |
| ENSG00000239763 | -1.5 | 0.01431 | 0.03322 | 9.420  | 0.392 | 9.072  | 9.981  | 13.721 | 1.462 | 12.480 | 15.314 |
| ENSG00000225420 | -1.5 | 0.01734 | 0.03899 | 2.300  | 0.734 | 1.569  | 3.002  | 3.399  | 0.630 | 3.014  | 4.330  |



|                 |            |      |          |         |        |       |        |        |         |       |         |         |
|-----------------|------------|------|----------|---------|--------|-------|--------|--------|---------|-------|---------|---------|
| ENSG00000231728 |            | -1.5 | 0.01857  | 0.04121 | 3.130  | 1.008 | 1.742  | 3.925  | 4.250   | 0.370 | 4.016   | 4.793   |
| ENSG00000271895 |            | -1.5 | 0.01933  | 0.04261 | 5.444  | 1.527 | 3.653  | 6.776  | 8.232   | 0.833 | 7.401   | 9.389   |
| ENSG00000280061 |            | -1.5 | 0.02041  | 0.04461 | 1.017  | 0.289 | 0.620  | 1.291  | 1.434   | 0.271 | 1.098   | 1.761   |
| ENSG00000263884 |            | -1.5 | 0.02195  | 0.04732 | 1.180  | 0.207 | 0.923  | 1.429  | 1.512   | 0.259 | 1.209   | 1.843   |
| ENSG00000256092 |            | -1.5 | 0.02208  | 0.04755 | 1.469  | 0.425 | 1.213  | 2.100  | 2.323   | 0.353 | 2.007   | 2.628   |
| ENSG00000259349 |            | -1.5 | 0.02294  | 0.04907 | 3.149  | 1.226 | 2.052  | 4.216  | 4.667   | 0.238 | 4.376   | 4.959   |
| ENSG00000235946 |            | -1.5 | 0.0232   | 0.04953 | 4.636  | 0.684 | 3.685  | 5.220  | 7.072   | 1.179 | 6.017   | 8.762   |
| ENSG00000258357 |            | -1.5 | 0.02421  | 0.05128 | 3.200  | 0.750 | 2.522  | 4.100  | 4.007   | 1.230 | 2.966   | 5.365   |
| ENSG00000234996 |            | -1.5 | 0.02488  | 0.05244 | 1.258  | 0.292 | 0.822  | 1.444  | 2.025   | 0.440 | 1.624   | 2.406   |
| ENSG00000279347 |            | -1.5 | 0.02639  | 0.05502 | 2.554  | 0.426 | 2.023  | 2.935  | 3.980   | 0.287 | 3.771   | 4.379   |
| ENSG00000272812 |            | -1.5 | 0.03034  | 0.0616  | 3.751  | 0.465 | 3.184  | 4.153  | 5.452   | 0.837 | 4.242   | 6.169   |
| ENSG00000226853 |            | -1.5 | 0.03542  | 0.07015 | 2.642  | 0.388 | 2.296  | 3.167  | 3.521   | 0.584 | 2.645   | 3.832   |
| ENSG00000273007 |            | -1.5 | 0.03551  | 0.07028 | 1.157  | 0.150 | 1.063  | 1.380  | 1.560   | 0.293 | 1.307   | 1.838   |
| ENSG00000227885 |            | -1.5 | 0.03604  | 0.07115 | 2.604  | 1.067 | 1.560  | 4.095  | 4.258   | 0.946 | 2.841   | 4.805   |
| ENSG00000248015 |            | -1.5 | 0.04176  | 0.08029 | 1.031  | 0.482 | 0.424  | 1.602  | 1.493   | 0.156 | 1.385   | 1.716   |
| ENSG00000269974 |            | -1.5 | 0.05091  | 0.09466 | 4.489  | 2.527 | 2.312  | 7.272  | 6.511   | 1.477 | 5.441   | 8.572   |
| ENSG00000204584 |            | -1.5 | 0.05514  | 0.10093 | 0.962  | 0.387 | 0.561  | 1.441  | 1.575   | 0.172 | 1.346   | 1.763   |
| ENSG00000261251 |            | -1.5 | 0.05652  | 0.10305 | 1.412  | 0.489 | 0.840  | 1.925  | 1.766   | 0.438 | 1.450   | 2.379   |
| ENSG00000279199 |            | -1.5 | 0.1086   | 0.17621 | 0.903  | 0.360 | 0.543  | 1.389  | 1.271   | 0.405 | 1.058   | 1.878   |
| ENSG00000151612 | ZNF827     | -1.6 | 7.4E-07  | 6.8E-06 | 5.824  | 0.945 | 4.466  | 6.622  | 9.263   | 0.113 | 9.162   | 9.425   |
| ENSG00000164684 | ZNF704     | -1.6 | 2.7E-08  | 3.5E-07 | 10.126 | 1.298 | 8.217  | 11.125 | 15.927  | 0.791 | 15.112  | 16.605  |
| ENSG00000183779 | ZNF703     | -1.6 | 1.3E-08  | 1.8E-07 | 69.027 | 7.686 | 59.388 | 77.823 | 109.829 | 1.808 | 107.551 | 111.282 |
| ENSG00000188295 | ZNF669     | -1.6 | 0.00034  | 0.00141 | 4.360  | 0.654 | 3.615  | 5.210  | 6.743   | 0.853 | 5.474   | 7.317   |
| ENSG00000269834 | ZNF528-AS1 | -1.6 | 6E-08    | 7.2E-07 | 9.274  | 1.047 | 8.252  | 10.238 | 14.891  | 1.641 | 12.763  | 16.184  |
| ENSG00000198795 | ZNF521     | -1.6 | 2.4E-06  | 1.9E-05 | 4.357  | 0.836 | 3.448  | 5.457  | 6.538   | 0.195 | 6.384   | 6.790   |
| ENSG00000165244 | ZNF367     | -1.6 | 7.36E-11 | 1.8E-09 | 42.106 | 3.767 | 36.919 | 45.783 | 63.914  | 2.685 | 60.350  | 65.986  |
| ENSG00000176293 | ZNF135     | -1.6 | 3.9E-06  | 3E-05   | 1.595  | 0.169 | 1.376  | 1.769  | 2.452   | 0.243 | 2.299   | 2.809   |
| ENSG00000100027 | YPEL1      | -1.6 | 3E-08    | 3.8E-07 | 7.288  | 0.625 | 6.592  | 8.025  | 11.150  | 0.692 | 10.562  | 11.899  |
| ENSG00000143184 | XCL1       | -1.6 | 0.01571  | 0.03586 | 2.047  | 0.483 | 1.448  | 2.533  | 3.508   | 0.764 | 2.473   | 4.085   |
| ENSG00000255282 | WTAPP1     | -1.6 | 0.00248  | 0.00765 | 0.977  | 0.237 | 0.664  | 1.240  | 1.565   | 0.269 | 1.208   | 1.772   |
| ENSG00000114251 | WNT5A      | -1.6 | 1.3E-08  | 1.9E-07 | 7.054  | 0.804 | 6.016  | 7.959  | 11.404  | 1.190 | 10.172  | 12.423  |
| ENSG00000002745 | WNT16      | -1.6 | 0.00745  | 0.0192  | 1.051  | 0.065 | 0.975  | 1.121  | 1.857   | 0.114 | 1.686   | 1.925   |
| ENSG00000187650 | VMAC       | -1.6 | 4E-05    | 0.00023 | 3.914  | 0.423 | 3.455  | 4.431  | 6.805   | 0.867 | 5.715   | 7.503   |
| ENSG00000147852 | VLDLR      | -1.6 | 1.2E-09  | 2.3E-08 | 8.007  | 0.723 | 7.062  | 8.773  | 12.311  | 0.236 | 12.186  | 12.665  |
| ENSG00000197355 | UAP1L1     | -1.6 | 2.53E-10 | 5.6E-09 | 24.957 | 1.351 | 23.739 | 26.381 | 37.210  | 2.424 | 35.151  | 39.853  |
| ENSG00000164938 | TP53INP1   | -1.6 | 3.2E-08  | 4.1E-07 | 29.665 | 4.176 | 23.715 | 32.662 | 47.988  | 2.373 | 45.635  | 50.032  |
| ENSG00000101470 | TNNC2      | -1.6 | 0.00941  | 0.02336 | 3.129  | 0.982 | 2.246  | 4.520  | 4.365   | 0.192 | 4.124   | 4.594   |
| ENSG00000154310 | TNIK       | -1.6 | 7.6E-09  | 1.2E-07 | 13.994 | 1.888 | 11.505 | 15.777 | 21.207  | 0.298 | 20.907  | 21.619  |

|                 |           |      |          |          |        |       |        |        |        |       |        |        |
|-----------------|-----------|------|----------|----------|--------|-------|--------|--------|--------|-------|--------|--------|
| ENSG00000147003 | TMEM27    | -1.6 | 0.00541  | 0.01463  | 1.727  | 0.508 | 1.108  | 2.335  | 2.825  | 0.277 | 2.448  | 3.033  |
| ENSG00000274386 | TMEM269   | -1.6 | 0.00118  | 0.00408  | 1.327  | 0.164 | 1.211  | 1.563  | 2.341  | 0.415 | 1.976  | 2.700  |
| ENSG00000261115 | TMEM178B  | -1.6 | 1E-07    | 1.2E-06  | 3.229  | 0.315 | 2.887  | 3.636  | 5.104  | 0.320 | 4.698  | 5.360  |
| ENSG00000144339 | TMEFF2    | -1.6 | 0.01135  | 0.02728  | 0.309  | 0.062 | 0.251  | 0.378  | 0.481  | 0.069 | 0.379  | 0.534  |
| ENSG00000239405 | TMED10P2  | -1.6 | 0.00184  | 0.00598  | 4.679  | 0.904 | 3.853  | 5.688  | 7.551  | 0.586 | 6.673  | 7.890  |
| ENSG00000106829 | TLE4      | -1.6 | 1.5E-09  | 2.8E-08  | 10.201 | 0.657 | 9.673  | 11.160 | 16.170 | 0.914 | 14.822 | 16.849 |
| ENSG00000187720 | THSD4     | -1.6 | 1.20E-10 | 2.8E-09  | 5.248  | 0.087 | 5.164  | 5.351  | 8.541  | 0.341 | 8.202  | 8.835  |
| ENSG00000167074 | TEF       | -1.6 | 1.5E-09  | 2.8E-08  | 10.446 | 0.773 | 9.572  | 11.252 | 15.964 | 0.819 | 15.531 | 17.191 |
| ENSG00000135111 | TBX3      | -1.6 | 2.27E-10 | 5.1E-09  | 12.354 | 0.837 | 11.592 | 13.150 | 19.236 | 1.331 | 17.873 | 20.378 |
| ENSG00000198075 | SULT1C4   | -1.6 | 0.00299  | 0.00891  | 1.169  | 0.162 | 0.946  | 1.306  | 1.838  | 0.394 | 1.444  | 2.385  |
| ENSG00000145687 | SSBP2     | -1.6 | 4.24E-12 | 1.50E-10 | 10.332 | 0.246 | 10.069 | 10.662 | 16.605 | 0.644 | 15.677 | 17.040 |
| ENSG00000149634 | SPATA25   | -1.6 | 0.01661  | 0.03763  | 4.235  | 1.950 | 2.531  | 7.041  | 7.141  | 1.668 | 4.891  | 8.923  |
| ENSG00000217236 | SP9       | -1.6 | 1.6E-05  | 0.0001   | 3.888  | 0.464 | 3.360  | 4.472  | 6.112  | 0.174 | 5.966  | 6.365  |
| ENSG00000177732 | SOX12     | -1.6 | 6.48E-10 | 1.3E-08  | 23.775 | 1.991 | 21.248 | 25.692 | 37.154 | 0.787 | 36.200 | 37.800 |
| ENSG00000120669 | SOHLH2    | -1.6 | 0.01714  | 0.03859  | 0.607  | 0.155 | 0.390  | 0.757  | 1.136  | 0.371 | 0.758  | 1.455  |
| ENSG00000197989 | SNHG12    | -1.6 | 6.6E-09  | 1E-07    | 13.641 | 0.886 | 12.672 | 14.744 | 20.580 | 0.838 | 20.048 | 21.830 |
| ENSG00000184347 | SLIT3     | -1.6 | 1.6E-05  | 0.0001   | 1.162  | 0.144 | 1.004  | 1.337  | 1.784  | 0.154 | 1.656  | 1.964  |
| ENSG00000050438 | SLC4A8    | -1.6 | 1.8E-06  | 1.5E-05  | 1.408  | 0.233 | 1.069  | 1.598  | 2.325  | 0.291 | 1.934  | 2.547  |
| ENSG00000137968 | SLC44A5   | -1.6 | 5.6E-05  | 0.0003   | 29.166 | 5.911 | 20.663 | 34.309 | 48.322 | 4.319 | 44.139 | 52.049 |
| ENSG00000198879 | SFMBT2    | -1.6 | 2.7E-08  | 3.5E-07  | 6.725  | 0.652 | 5.764  | 7.214  | 10.578 | 0.133 | 10.432 | 10.755 |
| ENSG00000082684 | SEMA5B    | -1.6 | 1.5E-06  | 1.3E-05  | 2.878  | 0.149 | 2.667  | 3.013  | 4.663  | 0.627 | 3.905  | 5.178  |
| ENSG00000228451 | SDAD1P1   | -1.6 | 4E-05    | 0.00022  | 4.224  | 0.987 | 3.004  | 5.422  | 6.435  | 0.314 | 6.035  | 6.685  |
| ENSG00000225953 | SATB2-AS1 | -1.6 | 0.00956  | 0.02364  | 0.665  | 0.113 | 0.560  | 0.818  | 1.103  | 0.265 | 0.892  | 1.441  |
| ENSG00000004139 | SARM1     | -1.6 | 3.2E-08  | 4E-07    | 2.800  | 0.192 | 2.569  | 2.991  | 4.338  | 0.202 | 4.203  | 4.639  |
| ENSG00000079102 | RUNX1T1   | -1.6 | 2.6E-06  | 2.1E-05  | 1.469  | 0.219 | 1.285  | 1.766  | 2.280  | 0.161 | 2.105  | 2.416  |
| ENSG00000100784 | RPS6KA5   | -1.6 | 1.9E-07  | 2E-06    | 1.854  | 0.247 | 1.513  | 2.093  | 2.846  | 0.286 | 2.544  | 3.090  |
| ENSG00000224892 | RPS4XP16  | -1.6 | 0.00334  | 0.00979  | 3.047  | 0.521 | 2.471  | 3.567  | 5.010  | 0.489 | 4.641  | 5.672  |
| ENSG00000177519 | RPRM      | -1.6 | 3.2E-08  | 4E-07    | 19.923 | 1.798 | 18.033 | 21.931 | 30.660 | 1.075 | 29.873 | 32.249 |
| ENSG00000140986 | RPL3L     | -1.6 | 0.01611  | 0.03664  | 0.853  | 0.223 | 0.663  | 1.176  | 1.475  | 0.419 | 0.911  | 1.793  |
| ENSG00000170153 | RNF150    | -1.6 | 3.2E-08  | 4.1E-07  | 9.058  | 1.301 | 7.277  | 10.403 | 14.701 | 0.600 | 13.966 | 15.190 |
| ENSG00000186479 | RGS7BP    | -1.6 | 0.00179  | 0.00585  | 0.867  | 0.203 | 0.653  | 1.113  | 1.365  | 0.218 | 1.040  | 1.507  |
| ENSG00000223638 | RFPL4A    | -1.6 | 0.00202  | 0.00648  | 4.527  | 0.931 | 3.690  | 5.564  | 6.796  | 1.466 | 5.742  | 8.967  |
| ENSG00000009413 | REV3L     | -1.6 | 0.00327  | 0.00962  | 14.409 | 4.051 | 8.339  | 16.699 | 22.975 | 1.910 | 20.961 | 24.606 |
| ENSG00000151164 | RAD9B     | -1.6 | 0.00216  | 0.00683  | 2.115  | 0.492 | 1.700  | 2.714  | 3.537  | 0.799 | 2.422  | 4.117  |
| ENSG00000050628 | PTGER3    | -1.6 | 0.02447  | 0.05174  | 0.243  | 0.153 | 0.115  | 0.458  | 0.388  | 0.030 | 0.358  | 0.413  |
| ENSG00000244694 | PTCHD4    | -1.6 | 7.5E-07  | 7E-06    | 3.947  | 0.134 | 3.837  | 4.136  | 6.398  | 0.163 | 6.187  | 6.584  |
| ENSG00000150687 | PRSS23    | -1.6 | 4.61E-12 | 1.61E-10 | 23.987 | 0.681 | 23.353 | 24.682 | 36.402 | 0.284 | 36.105 | 36.788 |
| ENSG00000152784 | PRDM8     | -1.6 | 0.0077   | 0.01974  | 0.468  | 0.132 | 0.353  | 0.623  | 0.798  | 0.132 | 0.632  | 0.904  |

|                 |            |      |          |          |         |        |         |         |         |        |         |         |
|-----------------|------------|------|----------|----------|---------|--------|---------|---------|---------|--------|---------|---------|
| ENSG00000061455 | PRDM6      | -1.6 | 3.2E-08  | 4.1E-07  | 3.934   | 0.433  | 3.314   | 4.240   | 6.515   | 0.461  | 5.957   | 6.893   |
| ENSG00000118557 | PMFBP1     | -1.6 | 0.00145  | 0.00486  | 1.020   | 0.260  | 0.726   | 1.330   | 1.721   | 0.315  | 1.386   | 1.990   |
| ENSG00000125551 | PLGLB2     | -1.6 | 0.00889  | 0.02229  | 0.989   | 0.238  | 0.776   | 1.275   | 1.742   | 0.445  | 1.238   | 2.116   |
| ENSG00000120278 | PLEKHG1    | -1.6 | 4.3E-09  | 7.1E-08  | 8.375   | 0.970  | 7.108   | 9.292   | 13.287  | 0.247  | 13.003  | 13.493  |
| ENSG00000134627 | PIWIL4     | -1.6 | 0.00026  | 0.00112  | 1.276   | 0.296  | 1.002   | 1.639   | 2.028   | 0.266  | 1.689   | 2.240   |
| ENSG00000139946 | PELI2      | -1.6 | 1.4E-07  | 1.6E-06  | 14.914  | 2.173  | 11.999  | 17.159  | 23.347  | 1.403  | 21.896  | 24.548  |
| ENSG00000254122 | PCDHGB7    | -1.6 | 0.00306  | 0.00909  | 0.608   | 0.178  | 0.455   | 0.863   | 0.977   | 0.058  | 0.891   | 1.012   |
| ENSG00000262209 | PCDHGB3    | -1.6 | 0.00115  | 0.004    | 1.028   | 0.268  | 0.635   | 1.241   | 1.567   | 0.220  | 1.288   | 1.827   |
| ENSG00000081853 | PCDHGA2    | -1.6 | 0.04199  | 0.08065  | 0.263   | 0.078  | 0.181   | 0.368   | 0.379   | 0.088  | 0.286   | 0.499   |
| ENSG00000120327 | PCDHB14    | -1.6 | 3.6E-07  | 3.6E-06  | 3.584   | 0.341  | 3.284   | 4.074   | 5.696   | 0.485  | 5.066   | 6.077   |
| ENSG00000169851 | PCDH7      | -1.6 | 5.09E-10 | 1E-08    | 9.887   | 0.623  | 9.004   | 10.467  | 15.554  | 0.882  | 14.495  | 16.281  |
| ENSG00000167081 | PBX3       | -1.6 | 1.3E-09  | 2.5E-08  | 14.441  | 0.398  | 14.122  | 15.018  | 22.104  | 0.193  | 21.851  | 22.320  |
| ENSG00000267270 | PARD6G-AS1 | -1.6 | 0.00084  | 0.00305  | 0.902   | 0.221  | 0.623   | 1.121   | 1.457   | 0.130  | 1.263   | 1.530   |
| ENSG00000116117 | PARD3B     | -1.6 | 1.9E-08  | 2.6E-07  | 3.480   | 0.212  | 3.291   | 3.703   | 5.543   | 0.281  | 5.220   | 5.778   |
| ENSG00000180914 | OXTR       | -1.6 | 0.00732  | 0.01892  | 0.865   | 0.206  | 0.669   | 1.077   | 1.207   | 0.245  | 0.856   | 1.427   |
| ENSG00000176046 | NUPR1      | -1.6 | 1.1E-06  | 1E-05    | 2.430   | 0.118  | 2.255   | 2.507   | 3.738   | 0.504  | 3.346   | 4.402   |
| ENSG00000113580 | NR3C1      | -1.6 | 9.70E-11 | 2.4E-09  | 22.698  | 2.136  | 19.544  | 24.156  | 35.511  | 2.421  | 32.905  | 37.571  |
| ENSG00000198156 | NPIPB6     | -1.6 | 0.00166  | 0.00547  | 1.323   | 0.111  | 1.216   | 1.476   | 1.988   | 0.381  | 1.660   | 2.354   |
| ENSG00000162599 | NFIA       | -1.6 | 2.2E-08  | 3E-07    | 4.351   | 0.646  | 3.494   | 5.056   | 6.888   | 0.093  | 6.824   | 7.022   |
| ENSG00000245532 | NEAT1      | -1.6 | 3E-07    | 3.1E-06  | 76.597  | 8.683  | 65.489  | 86.481  | 125.039 | 15.588 | 110.923 | 138.531 |
| ENSG00000249437 | NAIP       | -1.6 | 5.8E-07  | 5.6E-06  | 1.711   | 0.183  | 1.483   | 1.914   | 2.786   | 0.232  | 2.571   | 2.987   |
| ENSG00000255823 | MTRNR2L8   | -1.6 | 0.0014   | 0.00472  | 4.527   | 0.438  | 4.046   | 5.012   | 6.563   | 1.417  | 4.819   | 8.289   |
| ENSG00000003987 | MTMR7      | -1.6 | 1.3E-05  | 8.7E-05  | 3.922   | 0.379  | 3.378   | 4.254   | 6.100   | 0.530  | 5.599   | 6.559   |
| ENSG00000210151 | MT-TS1     | -1.6 | 0.036    | 0.0711   | 80.501  | 41.991 | 37.521  | 128.218 | 140.259 | 11.803 | 131.400 | 156.330 |
| ENSG00000173531 | MST1       | -1.6 | 3.6E-05  | 0.00021  | 1.827   | 0.095  | 1.713   | 1.915   | 3.030   | 0.598  | 2.497   | 3.549   |
| ENSG00000171843 | MLLT3      | -1.6 | 1.1E-08  | 1.6E-07  | 7.747   | 1.022  | 6.334   | 8.702   | 12.169  | 0.622  | 11.498  | 12.698  |
| ENSG00000135679 | MDM2       | -1.6 | 2E-07    | 2.1E-06  | 121.517 | 17.121 | 96.607  | 134.808 | 201.327 | 21.664 | 178.536 | 219.843 |
| ENSG00000277443 | MARCKS     | -1.6 | 7.91E-12 | 2.58E-10 | 134.649 | 4.359  | 130.760 | 138.940 | 203.288 | 11.154 | 192.025 | 212.875 |
| ENSG00000251562 | MALAT1     | -1.6 | 7.9E-06  | 5.5E-05  | 69.186  | 7.618  | 58.195  | 74.518  | 107.023 | 16.914 | 85.852  | 120.671 |
| ENSG00000150551 | LYPD1      | -1.6 | 1.6E-08  | 2.2E-07  | 12.147  | 0.751  | 11.609  | 13.259  | 18.389  | 0.994  | 17.528  | 19.286  |
| ENSG00000176204 | LRRTM4     | -1.6 | 1.7E-05  | 0.00011  | 2.025   | 0.308  | 1.601   | 2.322   | 2.951   | 0.031  | 2.916   | 2.991   |
| ENSG00000033122 | LRR7       | -1.6 | 1.6E-07  | 1.8E-06  | 1.946   | 0.307  | 1.518   | 2.221   | 3.157   | 0.084  | 3.065   | 3.270   |
| ENSG00000238083 | LRR37A2    | -1.6 | 2.9E-08  | 3.7E-07  | 4.827   | 0.496  | 4.289   | 5.489   | 7.632   | 0.774  | 6.690   | 8.265   |
| ENSG00000176681 | LRR37A     | -1.6 | 1.5E-07  | 1.7E-06  | 2.866   | 0.294  | 2.611   | 3.232   | 4.632   | 0.502  | 4.189   | 5.067   |
| ENSG00000275294 | LINC02340  | -1.6 | 0.01264  | 0.02985  | 2.314   | 0.466  | 1.882   | 2.953   | 3.192   | 0.878  | 2.470   | 4.251   |
| ENSG00000253161 | LINC01605  | -1.6 | 0.01512  | 0.03475  | 1.551   | 0.258  | 1.356   | 1.901   | 2.150   | 0.622  | 1.445   | 2.961   |
| ENSG00000272888 | LINC01578  | -1.6 | 2.77E-11 | 7.68E-10 | 20.361  | 1.554  | 18.676  | 21.866  | 31.259  | 0.516  | 30.731  | 31.969  |
| ENSG00000250584 | LINC01511  | -1.6 | 0.02601  | 0.05441  | 1.102   | 0.292  | 0.845   | 1.440   | 1.554   | 0.517  | 1.131   | 2.188   |

|                 |           |      |          |          |         |       |         |         |         |       |         |         |
|-----------------|-----------|------|----------|----------|---------|-------|---------|---------|---------|-------|---------|---------|
| ENSG00000248441 | LINC01197 | -1.6 | 0.00244  | 0.00755  | 0.475   | 0.066 | 0.414   | 0.541   | 0.695   | 0.187 | 0.570   | 0.967   |
| ENSG00000260941 | LINC00622 | -1.6 | 0.01545  | 0.03541  | 1.117   | 0.477 | 0.610   | 1.552   | 1.886   | 0.115 | 1.751   | 1.982   |
| ENSG00000225511 | LINC00475 | -1.6 | 0.01373  | 0.03208  | 0.688   | 0.181 | 0.549   | 0.955   | 1.024   | 0.309 | 0.733   | 1.460   |
| ENSG00000196668 | LINC00173 | -1.6 | 0.00098  | 0.00349  | 2.700   | 0.704 | 1.686   | 3.309   | 4.047   | 0.406 | 3.786   | 4.640   |
| ENSG00000005483 | KMT2E     | -1.6 | 7.4E-08  | 8.7E-07  | 25.846  | 3.982 | 20.160  | 29.313  | 39.371  | 0.589 | 38.611  | 39.837  |
| ENSG00000118263 | KLF7      | -1.6 | 1.2E-06  | 1.1E-05  | 1.650   | 0.177 | 1.512   | 1.895   | 2.541   | 0.149 | 2.412   | 2.676   |
| ENSG00000118922 | KLF12     | -1.6 | 1.9E-05  | 0.00012  | 12.804  | 2.365 | 9.442   | 14.603  | 19.967  | 1.166 | 18.853  | 20.974  |
| ENSG00000172059 | KLF11     | -1.6 | 1.78E-10 | 4E-09    | 16.924  | 0.994 | 15.895  | 17.907  | 27.086  | 1.440 | 26.213  | 29.218  |
| ENSG00000196196 | HRCT1     | -1.6 | 0.00392  | 0.01119  | 3.074   | 0.925 | 1.840   | 3.983   | 4.650   | 0.544 | 4.198   | 5.291   |
| ENSG00000258900 | HNRNPCP1  | -1.6 | 0.00983  | 0.0242   | 4.016   | 1.366 | 1.971   | 4.810   | 5.857   | 1.346 | 4.272   | 7.565   |
| ENSG00000215630 | GUSBP9    | -1.6 | 0.0025   | 0.00769  | 5.605   | 1.365 | 3.992   | 7.134   | 9.464   | 1.335 | 7.502   | 10.307  |
| ENSG00000120370 | GORAB     | -1.6 | 4.3E-08  | 5.3E-07  | 8.147   | 1.226 | 6.613   | 9.586   | 12.897  | 0.307 | 12.532  | 13.150  |
| ENSG00000124713 | GNMT      | -1.6 | 0.00537  | 0.01455  | 2.773   | 0.719 | 2.062   | 3.694   | 4.530   | 0.692 | 3.604   | 5.060   |
| ENSG00000213453 | FTH1P3    | -1.6 | 0.00529  | 0.01438  | 4.845   | 0.483 | 4.372   | 5.519   | 7.067   | 1.937 | 5.527   | 9.546   |
| ENSG00000265817 | FSBP      | -1.6 | 0.00529  | 0.01438  | 0.877   | 0.228 | 0.619   | 1.143   | 1.238   | 0.174 | 1.074   | 1.485   |
| ENSG00000114861 | FOXP1     | -1.6 | 5E-08    | 6.1E-07  | 3.635   | 0.535 | 2.974   | 4.228   | 5.687   | 0.155 | 5.590   | 5.917   |
| ENSG00000185070 | FLRT2     | -1.6 | 6.45E-10 | 1.3E-08  | 2.832   | 0.306 | 2.386   | 3.070   | 4.688   | 0.432 | 4.202   | 5.051   |
| ENSG00000170271 | FAXDC2    | -1.6 | 3.6E-07  | 3.6E-06  | 5.081   | 0.231 | 4.820   | 5.303   | 7.834   | 0.812 | 7.135   | 8.648   |
| ENSG00000219626 | FAM228B   | -1.6 | 2.5E-06  | 2E-05    | 3.945   | 0.547 | 3.427   | 4.593   | 6.275   | 1.007 | 4.857   | 6.994   |
| ENSG00000148541 | FAM13C    | -1.6 | 9.3E-08  | 1.1E-06  | 3.989   | 0.602 | 3.130   | 4.533   | 6.115   | 0.105 | 6.048   | 6.269   |
| ENSG00000206120 | EGFEM1P   | -1.6 | 0.00018  | 0.00081  | 1.490   | 0.287 | 1.126   | 1.772   | 2.531   | 0.520 | 2.039   | 2.980   |
| ENSG00000143507 | DUSP10    | -1.6 | 0.00014  | 0.00067  | 2.992   | 0.521 | 2.529   | 3.708   | 4.426   | 0.333 | 4.161   | 4.852   |
| ENSG00000259660 | DNM1P47   | -1.6 | 0.0001   | 0.0005   | 0.374   | 0.029 | 0.332   | 0.395   | 0.604   | 0.092 | 0.519   | 0.684   |
| ENSG00000105516 | DBP       | -1.6 | 1.5E-08  | 2.1E-07  | 7.666   | 0.768 | 6.749   | 8.475   | 11.581  | 0.467 | 11.093  | 12.218  |
| ENSG00000165182 | CXorf58   | -1.6 | 0.00386  | 0.01105  | 1.461   | 0.267 | 1.238   | 1.808   | 2.459   | 0.286 | 2.174   | 2.856   |
| ENSG00000107562 | CXCL12    | -1.6 | 2.7E-07  | 2.8E-06  | 2.299   | 0.111 | 2.144   | 2.406   | 3.656   | 0.137 | 3.544   | 3.826   |
| ENSG00000129749 | CHRNA10   | -1.6 | 0.02241  | 0.04816  | 0.845   | 0.236 | 0.620   | 1.176   | 1.194   | 0.133 | 1.046   | 1.370   |
| ENSG00000116785 | CFHR3     | -1.6 | 0.00084  | 0.00305  | 1.569   | 0.364 | 1.305   | 2.105   | 2.504   | 0.394 | 2.043   | 2.832   |
| ENSG00000111276 | CDKN1B    | -1.6 | 3.98E-12 | 1.42E-10 | 43.476  | 1.288 | 42.412  | 45.346  | 69.866  | 3.898 | 64.598  | 72.817  |
| ENSG00000134256 | CD101     | -1.6 | 0.00112  | 0.00391  | 1.024   | 0.241 | 0.789   | 1.265   | 1.550   | 0.036 | 1.514   | 1.600   |
| ENSG00000256304 | CCDC150P1 | -1.6 | 0.00112  | 0.0039   | 1.669   | 0.312 | 1.397   | 2.118   | 2.374   | 0.259 | 2.233   | 2.761   |
| ENSG00000183287 | CCBE1     | -1.6 | 6.7E-09  | 1.1E-07  | 4.133   | 0.238 | 3.867   | 4.446   | 6.473   | 0.153 | 6.281   | 6.657   |
| ENSG00000204387 | C6orf48   | -1.6 | 4.63E-11 | 1.2E-09  | 132.766 | 4.903 | 126.421 | 138.360 | 202.458 | 7.782 | 198.144 | 214.122 |
| ENSG00000261652 | C15orf65  | -1.6 | 0.02357  | 0.0502   | 3.785   | 1.262 | 2.168   | 5.244   | 6.232   | 0.606 | 5.346   | 6.624   |
| ENSG00000183346 | C10orf107 | -1.6 | 0.0007   | 0.00263  | 3.078   | 0.865 | 2.425   | 4.338   | 4.866   | 0.315 | 4.394   | 5.034   |
| ENSG00000232260 | BTF3L4P1  | -1.6 | 0.00211  | 0.0067   | 12.465  | 1.527 | 10.180  | 13.342  | 17.349  | 3.357 | 13.872  | 20.225  |
| ENSG00000112175 | BMP5      | -1.6 | 0.00449  | 0.01254  | 0.596   | 0.076 | 0.523   | 0.671   | 0.906   | 0.060 | 0.855   | 0.994   |
| ENSG00000123095 | BHLHE41   | -1.6 | 2.9E-08  | 3.8E-07  | 7.561   | 0.440 | 7.015   | 8.091   | 11.284  | 0.357 | 10.764  | 11.517  |

|                 |          |      |         |         |        |       |        |        |        |       |        |        |
|-----------------|----------|------|---------|---------|--------|-------|--------|--------|--------|-------|--------|--------|
| ENSG00000113916 | BCL6     | -1.6 | 2.4E-08 | 3.2E-07 | 4.552  | 0.302 | 4.283  | 4.970  | 6.859  | 0.213 | 6.560  | 7.012  |
| ENSG00000127152 | BCL11B   | -1.6 | 1.7E-05 | 0.00011 | 1.311  | 0.177 | 1.144  | 1.482  | 2.013  | 0.082 | 1.940  | 2.131  |
| ENSG00000119866 | BCL11A   | -1.6 | 1.3E-07 | 1.4E-06 | 4.574  | 0.627 | 3.966  | 5.439  | 7.305  | 0.444 | 6.677  | 7.620  |
| ENSG00000105327 | BBC3     | -1.6 | 9.7E-09 | 1.4E-07 | 22.421 | 2.251 | 20.688 | 25.537 | 35.281 | 0.488 | 34.977 | 36.010 |
| ENSG00000158321 | AUTS2    | -1.6 | 2.4E-07 | 2.6E-06 | 8.362  | 0.226 | 8.175  | 8.671  | 13.267 | 0.672 | 12.889 | 14.274 |
| ENSG00000124788 | ATXN1    | -1.6 | 1.8E-07 | 1.9E-06 | 3.580  | 0.560 | 2.757  | 4.001  | 5.550  | 0.186 | 5.340  | 5.706  |
| ENSG00000105409 | ATP1A3   | -1.6 | 0.02704 | 0.05611 | 0.686  | 0.337 | 0.402  | 1.109  | 1.006  | 0.147 | 0.902  | 1.214  |
| ENSG00000171681 | ATF7IP   | -1.6 | 6.2E-07 | 5.9E-06 | 34.721 | 5.506 | 26.509 | 38.268 | 53.529 | 2.646 | 50.990 | 55.813 |
| ENSG00000221883 | ARIH2OS  | -1.6 | 0.00228 | 0.00717 | 1.800  | 0.337 | 1.476  | 2.226  | 2.731  | 0.313 | 2.261  | 2.895  |
| ENSG00000178878 | APOLD1   | -1.6 | 1.2E-07 | 1.4E-06 | 4.939  | 0.776 | 4.213  | 5.997  | 8.100  | 0.426 | 7.807  | 8.734  |
| ENSG00000155966 | AFF2     | -1.6 | 1.2E-06 | 1E-05   | 3.413  | 0.516 | 2.689  | 3.893  | 5.349  | 0.193 | 5.160  | 5.619  |
| ENSG00000145536 | ADAMTS16 | -1.6 | 2.2E-06 | 1.8E-05 | 4.108  | 0.485 | 3.415  | 4.449  | 6.448  | 0.528 | 6.095  | 7.234  |
| ENSG00000077522 | ACTN2    | -1.6 | 1.6E-07 | 1.7E-06 | 4.832  | 0.571 | 3.995  | 5.254  | 7.996  | 0.938 | 6.666  | 8.655  |
| ENSG00000160179 | ABCG1    | -1.6 | 7.4E-07 | 6.9E-06 | 3.464  | 0.432 | 3.010  | 3.997  | 5.388  | 0.221 | 5.056  | 5.500  |
| ENSG00000269994 |          | -1.6 | 7E-08   | 8.3E-07 | 7.972  | 0.444 | 7.425  | 8.477  | 12.887 | 0.697 | 11.867 | 13.335 |
| ENSG00000179978 |          | -1.6 | 6.8E-07 | 6.4E-06 | 3.766  | 0.267 | 3.374  | 3.971  | 6.114  | 0.579 | 5.569  | 6.614  |
| ENSG00000279208 |          | -1.6 | 3.5E-06 | 2.7E-05 | 22.072 | 2.966 | 18.692 | 25.590 | 34.773 | 2.452 | 31.521 | 36.667 |
| ENSG00000268575 |          | -1.6 | 9.3E-06 | 6.3E-05 | 2.776  | 0.357 | 2.443  | 3.264  | 4.463  | 0.466 | 3.820  | 4.806  |
| ENSG00000279696 |          | -1.6 | 2.8E-05 | 0.00017 | 2.356  | 0.091 | 2.271  | 2.478  | 3.751  | 0.084 | 3.626  | 3.796  |
| ENSG00000261754 |          | -1.6 | 3E-05   | 0.00018 | 3.961  | 0.655 | 3.343  | 4.776  | 6.338  | 0.452 | 5.663  | 6.597  |
| ENSG00000213073 |          | -1.6 | 3.5E-05 | 0.0002  | 3.050  | 0.414 | 2.589  | 3.480  | 5.061  | 0.592 | 4.370  | 5.554  |
| ENSG00000253816 |          | -1.6 | 4.2E-05 | 0.00024 | 17.476 | 3.503 | 13.180 | 20.974 | 28.008 | 0.774 | 26.855 | 28.457 |
| ENSG00000257511 |          | -1.6 | 5.9E-05 | 0.00032 | 9.077  | 1.858 | 7.332  | 11.520 | 13.735 | 0.736 | 13.026 | 14.770 |
| ENSG00000273373 |          | -1.6 | 6.8E-05 | 0.00036 | 8.014  | 1.847 | 5.966  | 10.142 | 13.048 | 1.405 | 11.409 | 14.219 |
| ENSG00000204802 |          | -1.6 | 7.2E-05 | 0.00037 | 2.616  | 0.249 | 2.308  | 2.852  | 3.918  | 0.283 | 3.702  | 4.298  |
| ENSG00000224886 |          | -1.6 | 0.0002  | 0.00091 | 9.578  | 1.326 | 8.493  | 11.429 | 16.096 | 2.132 | 13.785 | 17.908 |
| ENSG00000233045 |          | -1.6 | 0.00025 | 0.00109 | 9.059  | 0.889 | 8.137  | 10.274 | 14.144 | 0.867 | 13.482 | 15.308 |
| ENSG00000261136 |          | -1.6 | 0.00076 | 0.00282 | 1.552  | 0.276 | 1.209  | 1.838  | 2.561  | 0.103 | 2.430  | 2.681  |
| ENSG00000185065 |          | -1.6 | 0.00105 | 0.0037  | 2.466  | 0.516 | 1.949  | 3.162  | 3.514  | 0.202 | 3.221  | 3.684  |
| ENSG00000261879 |          | -1.6 | 0.00108 | 0.00379 | 2.881  | 0.688 | 2.153  | 3.483  | 4.783  | 0.177 | 4.519  | 4.881  |
| ENSG00000275481 |          | -1.6 | 0.00142 | 0.00477 | 1.312  | 0.180 | 1.164  | 1.532  | 2.046  | 0.218 | 1.902  | 2.362  |
| ENSG00000280367 |          | -1.6 | 0.00164 | 0.00541 | 1.592  | 0.299 | 1.173  | 1.877  | 2.530  | 0.671 | 1.902  | 3.110  |
| ENSG00000215022 |          | -1.6 | 0.00237 | 0.00739 | 1.017  | 0.192 | 0.757  | 1.215  | 1.598  | 0.080 | 1.536  | 1.705  |
| ENSG00000273448 |          | -1.6 | 0.00281 | 0.00848 | 3.534  | 0.379 | 3.086  | 3.905  | 6.547  | 1.917 | 4.454  | 8.174  |
| ENSG00000272669 |          | -1.6 | 0.00476 | 0.01321 | 5.206  | 1.361 | 3.902  | 7.089  | 8.518  | 1.065 | 7.358  | 9.423  |
| ENSG00000265218 |          | -1.6 | 0.00477 | 0.01321 | 2.665  | 0.441 | 2.044  | 3.077  | 4.503  | 1.338 | 2.688  | 5.512  |
| ENSG00000231551 |          | -1.6 | 0.00491 | 0.01354 | 1.138  | 0.284 | 0.838  | 1.505  | 1.750  | 0.260 | 1.533  | 2.054  |
| ENSG00000253414 |          | -1.6 | 0.00493 | 0.01357 | 7.690  | 1.932 | 6.068  | 10.153 | 10.529 | 1.605 | 9.698  | 12.936 |

|                 |            |      |          |          |        |       |        |        |        |       |        |        |
|-----------------|------------|------|----------|----------|--------|-------|--------|--------|--------|-------|--------|--------|
| ENSG00000259275 |            | -1.6 | 0.00519  | 0.01416  | 0.944  | 0.300 | 0.574  | 1.251  | 1.607  | 0.412 | 1.153  | 1.956  |
| ENSG00000283757 |            | -1.6 | 0.00523  | 0.01425  | 0.543  | 0.123 | 0.446  | 0.713  | 0.941  | 0.218 | 0.678  | 1.120  |
| ENSG00000275560 |            | -1.6 | 0.00551  | 0.01487  | 6.910  | 1.580 | 4.632  | 8.270  | 10.717 | 2.862 | 6.450  | 12.589 |
| ENSG00000236028 |            | -1.6 | 0.00564  | 0.01516  | 7.900  | 3.313 | 5.367  | 12.774 | 11.584 | 1.161 | 10.938 | 13.319 |
| ENSG00000272142 |            | -1.6 | 0.0086   | 0.02168  | 2.557  | 0.078 | 2.455  | 2.643  | 3.901  | 0.400 | 3.459  | 4.431  |
| ENSG00000272328 |            | -1.6 | 0.01185  | 0.02827  | 2.893  | 0.902 | 2.161  | 4.022  | 5.091  | 0.924 | 3.866  | 5.805  |
| ENSG00000235100 |            | -1.6 | 0.01337  | 0.03137  | 1.810  | 0.514 | 1.102  | 2.332  | 3.129  | 0.230 | 2.852  | 3.319  |
| ENSG00000224505 |            | -1.6 | 0.01391  | 0.03244  | 3.404  | 0.597 | 2.753  | 3.939  | 5.087  | 0.641 | 4.163  | 5.642  |
| ENSG00000256591 |            | -1.6 | 0.01684  | 0.03808  | 0.316  | 0.110 | 0.176  | 0.423  | 0.529  | 0.026 | 0.501  | 0.551  |
| ENSG00000279456 |            | -1.6 | 0.02482  | 0.05234  | 1.225  | 0.121 | 1.071  | 1.356  | 1.896  | 0.503 | 1.186  | 2.254  |
| ENSG00000272720 |            | -1.6 | 0.02505  | 0.0527   | 1.417  | 0.391 | 1.028  | 1.885  | 2.562  | 1.059 | 1.096  | 3.340  |
| ENSG00000272562 |            | -1.6 | 0.03727  | 0.07314  | 4.068  | 1.194 | 3.308  | 5.838  | 7.571  | 2.073 | 4.488  | 8.791  |
| ENSG00000248774 |            | -1.6 | 0.0414   | 0.07973  | 5.260  | 2.941 | 2.829  | 9.061  | 7.798  | 1.604 | 6.331  | 9.187  |
| ENSG00000235109 | ZSCAN31    | -1.7 | 1E-06    | 8.9E-06  | 2.246  | 0.199 | 2.051  | 2.519  | 3.767  | 0.494 | 3.215  | 4.184  |
| ENSG00000229956 | ZRANB2-AS2 | -1.7 | 0.00379  | 0.01087  | 0.318  | 0.062 | 0.266  | 0.406  | 0.470  | 0.086 | 0.389  | 0.591  |
| ENSG00000127903 | ZNF835     | -1.7 | 0.00224  | 0.00705  | 0.982  | 0.247 | 0.679  | 1.281  | 1.454  | 0.298 | 1.286  | 1.900  |
| ENSG00000258405 | ZNF578     | -1.7 | 7.2E-07  | 6.7E-06  | 2.321  | 0.368 | 1.791  | 2.600  | 3.856  | 0.414 | 3.318  | 4.181  |
| ENSG00000198342 | ZNF442     | -1.7 | 3.3E-05  | 0.00019  | 1.060  | 0.071 | 0.987  | 1.137  | 1.709  | 0.153 | 1.579  | 1.875  |
| ENSG00000196724 | ZNF418     | -1.7 | 0.00033  | 0.00139  | 1.243  | 0.166 | 1.095  | 1.479  | 2.301  | 0.372 | 1.967  | 2.623  |
| ENSG00000159915 | ZNF233     | -1.7 | 3.2E-07  | 3.3E-06  | 4.019  | 0.265 | 3.648  | 4.259  | 6.232  | 0.380 | 5.907  | 6.636  |
| ENSG00000188177 | ZC3H6      | -1.7 | 1.6E-08  | 2.3E-07  | 3.349  | 0.554 | 2.666  | 3.988  | 5.734  | 0.397 | 5.210  | 6.042  |
| ENSG00000175564 | UCP3       | -1.7 | 0.00229  | 0.00717  | 0.714  | 0.104 | 0.575  | 0.827  | 1.199  | 0.161 | 0.961  | 1.299  |
| ENSG00000179981 | TSHZ1      | -1.7 | 5.36E-10 | 1.1E-08  | 6.533  | 0.248 | 6.314  | 6.853  | 11.199 | 0.078 | 11.135 | 11.313 |
| ENSG00000117586 | TNFSF4     | -1.7 | 0.00047  | 0.00188  | 0.813  | 0.163 | 0.673  | 1.043  | 1.515  | 0.220 | 1.266  | 1.700  |
| ENSG00000139364 | TMEM132B   | -1.7 | 1.1E-05  | 7.4E-05  | 0.531  | 0.049 | 0.476  | 0.592  | 0.951  | 0.155 | 0.760  | 1.077  |
| ENSG00000196781 | TLE1       | -1.7 | 1.87E-11 | 5.40E-10 | 20.100 | 1.202 | 19.002 | 21.222 | 33.812 | 0.803 | 33.262 | 34.964 |
| ENSG00000125398 | SOX9       | -1.7 | 6.49E-10 | 1.3E-08  | 10.294 | 0.977 | 8.940  | 11.106 | 17.456 | 0.126 | 17.285 | 17.589 |
| ENSG00000134595 | SOX3       | -1.7 | 0.00013  | 0.00062  | 2.481  | 0.180 | 2.311  | 2.697  | 4.074  | 0.631 | 3.242  | 4.565  |
| ENSG00000084453 | SLCO1A2    | -1.7 | 0.00507  | 0.01389  | 0.309  | 0.105 | 0.221  | 0.461  | 0.516  | 0.099 | 0.391  | 0.634  |
| ENSG00000147606 | SLC26A7    | -1.7 | 0.01202  | 0.0286   | 0.429  | 0.124 | 0.316  | 0.555  | 0.776  | 0.257 | 0.401  | 0.941  |
| ENSG00000180592 | SKIDA1     | -1.7 | 2E-06    | 1.6E-05  | 1.172  | 0.059 | 1.100  | 1.242  | 1.957  | 0.217 | 1.641  | 2.138  |
| ENSG00000185008 | ROBO2      | -1.7 | 3.4E-08  | 4.3E-07  | 1.337  | 0.135 | 1.154  | 1.468  | 2.241  | 0.088 | 2.154  | 2.317  |
| ENSG00000207081 | RNU6-616P  | -1.7 | 0.00018  | 0.00082  | 48.009 | 4.586 | 43.072 | 54.084 | 79.633 | 8.086 | 70.704 | 86.479 |
| ENSG00000229292 | RFPL4AL1   | -1.7 | 0.00373  | 0.01075  | 2.750  | 0.725 | 1.962  | 3.710  | 4.547  | 0.515 | 4.117  | 5.140  |
| ENSG00000225465 | RFPL1S     | -1.7 | 0.00443  | 0.01243  | 0.359  | 0.117 | 0.212  | 0.486  | 0.571  | 0.020 | 0.560  | 0.601  |
| ENSG00000102032 | RENBP      | -1.7 | 1.7E-08  | 2.4E-07  | 10.513 | 0.309 | 10.198 | 10.809 | 17.251 | 1.066 | 16.520 | 18.780 |
| ENSG00000138670 | RASGEF1B   | -1.7 | 1.1E-08  | 1.6E-07  | 2.120  | 0.148 | 1.932  | 2.258  | 3.433  | 0.247 | 3.130  | 3.635  |
| ENSG00000117569 | PTBP2      | -1.7 | 1.2E-09  | 2.4E-08  | 5.482  | 0.686 | 4.557  | 6.212  | 9.129  | 0.767 | 8.286  | 9.779  |

|                 |           |      |          |          |        |       |        |        |        |       |        |        |
|-----------------|-----------|------|----------|----------|--------|-------|--------|--------|--------|-------|--------|--------|
| ENSG00000109819 | PPARGC1A  | -1.7 | 2.7E-07  | 2.8E-06  | 1.395  | 0.166 | 1.170  | 1.569  | 2.343  | 0.156 | 2.162  | 2.543  |
| ENSG00000184486 | POU3F2    | -1.7 | 1.2E-06  | 1E-05    | 3.485  | 0.546 | 2.736  | 4.047  | 5.699  | 0.389 | 5.151  | 6.070  |
| ENSG00000145632 | PLK2      | -1.7 | 4.38E-11 | 1.1E-09  | 18.035 | 1.516 | 16.474 | 19.931 | 30.219 | 1.628 | 28.366 | 31.587 |
| ENSG00000186472 | PCLO      | -1.7 | 5.9E-06  | 4.3E-05  | 2.362  | 0.344 | 1.876  | 2.680  | 4.252  | 0.543 | 3.777  | 4.722  |
| ENSG00000081818 | PCDHB4    | -1.7 | 0.04552  | 0.08619  | 0.550  | 0.178 | 0.335  | 0.764  | 0.995  | 0.338 | 0.708  | 1.484  |
| ENSG00000146001 | PCDHB18P  | -1.7 | 1.6E-06  | 1.4E-05  | 2.821  | 0.396 | 2.380  | 3.334  | 5.010  | 0.187 | 4.731  | 5.120  |
| ENSG00000113248 | PCDHB15   | -1.7 | 1.2E-05  | 8E-05    | 2.349  | 0.296 | 1.922  | 2.601  | 3.916  | 0.472 | 3.213  | 4.233  |
| ENSG00000250120 | PCDHA10   | -1.7 | 1.1E-06  | 1E-05    | 2.165  | 0.286 | 1.743  | 2.376  | 3.713  | 0.523 | 3.106  | 4.150  |
| ENSG00000188158 | NHS       | -1.7 | 3.9E-06  | 3E-05    | 1.631  | 0.287 | 1.219  | 1.875  | 2.644  | 0.116 | 2.580  | 2.818  |
| ENSG00000147862 | NFIB      | -1.7 | 8.4E-09  | 1.3E-07  | 6.213  | 0.800 | 5.179  | 7.054  | 11.049 | 0.829 | 9.943  | 11.686 |
| ENSG00000185432 | METTL7A   | -1.7 | 1.29E-11 | 3.93E-10 | 28.034 | 1.761 | 26.295 | 29.597 | 48.148 | 3.863 | 43.704 | 51.382 |
| ENSG00000229619 | MBNL1-AS1 | -1.7 | 6.6E-06  | 4.7E-05  | 1.885  | 0.386 | 1.327  | 2.206  | 3.133  | 0.358 | 2.767  | 3.440  |
| ENSG00000141639 | MAPK4     | -1.7 | 1.4E-07  | 1.5E-06  | 3.213  | 0.511 | 2.865  | 3.955  | 5.505  | 0.319 | 5.082  | 5.751  |
| ENSG00000196782 | MAML3     | -1.7 | 2.3E-08  | 3.1E-07  | 4.214  | 0.558 | 3.536  | 4.813  | 6.707  | 0.074 | 6.666  | 6.818  |
| ENSG00000173988 | LRRC63    | -1.7 | 0.00057  | 0.00221  | 1.375  | 0.268 | 1.009  | 1.639  | 2.576  | 0.427 | 1.936  | 2.801  |
| ENSG00000168702 | LRP1B     | -1.7 | 0.00346  | 0.01009  | 0.147  | 0.039 | 0.093  | 0.178  | 0.255  | 0.030 | 0.227  | 0.281  |
| ENSG00000226383 | LINC01876 | -1.7 | 0.00025  | 0.00109  | 5.219  | 1.422 | 3.218  | 6.575  | 8.993  | 1.830 | 6.845  | 10.515 |
| ENSG00000261326 | LINC01355 | -1.7 | 0.00017  | 0.00079  | 5.231  | 0.724 | 4.583  | 6.199  | 9.374  | 1.459 | 7.762  | 10.609 |
| ENSG00000258441 | LINC00641 | -1.7 | 5.1E-07  | 4.9E-06  | 9.809  | 1.704 | 7.341  | 11.069 | 16.444 | 1.394 | 14.674 | 17.559 |
| ENSG00000250682 | LINC00491 | -1.7 | 1.4E-06  | 1.2E-05  | 9.140  | 1.445 | 7.059  | 10.383 | 15.044 | 0.877 | 13.731 | 15.516 |
| ENSG00000116678 | LEPR      | -1.7 | 1.8E-07  | 1.9E-06  | 8.607  | 1.585 | 6.374  | 10.058 | 14.184 | 0.843 | 13.277 | 14.902 |
| ENSG00000124743 | KLHL31    | -1.7 | 0.00097  | 0.00347  | 0.714  | 0.112 | 0.581  | 0.821  | 1.074  | 0.182 | 0.917  | 1.233  |
| ENSG00000231160 | KLF3-AS1  | -1.7 | 0.01829  | 0.04076  | 0.563  | 0.133 | 0.427  | 0.691  | 0.956  | 0.098 | 0.833  | 1.073  |
| ENSG00000049130 | KITLG     | -1.7 | 3.4E-05  | 0.0002   | 11.776 | 2.764 | 7.643  | 13.452 | 20.446 | 2.448 | 17.506 | 22.463 |
| ENSG00000162849 | KIF26B    | -1.7 | 0.00011  | 0.00055  | 0.487  | 0.145 | 0.353  | 0.620  | 0.832  | 0.040 | 0.798  | 0.872  |
| ENSG00000156650 | KAT6B     | -1.7 | 8.5E-09  | 1.3E-07  | 11.093 | 1.756 | 8.658  | 12.493 | 18.285 | 0.316 | 17.814 | 18.466 |
| ENSG00000122641 | INHBA     | -1.7 | 3.6E-03  | 0.0104   | 0.362  | 0.055 | 0.306  | 0.437  | 0.606  | 0.181 | 0.359  | 0.795  |
| ENSG00000002587 | HS3ST1    | -1.7 | 1.0E-02  | 0.02496  | 0.280  | 0.104 | 0.180  | 0.426  | 0.508  | 0.124 | 0.346  | 0.606  |
| ENSG00000135116 | HRK       | -1.7 | 8.9E-08  | 1E-06    | 4.230  | 0.543 | 3.422  | 4.578  | 7.062  | 0.590 | 6.177  | 7.358  |
| ENSG00000105996 | HOXA2     | -1.7 | 3.0E-03  | 0.00892  | 0.961  | 0.293 | 0.682  | 1.259  | 1.684  | 0.158 | 1.572  | 1.917  |
| ENSG00000237125 | HAND2-AS1 | -1.7 | 5.2E-02  | 0.09594  | 0.117  | 0.053 | 0.062  | 0.185  | 0.174  | 0.077 | 0.115  | 0.288  |
| ENSG00000183098 | GPC6      | -1.7 | 4.5E-09  | 7.3E-08  | 5.662  | 0.456 | 4.988  | 5.980  | 9.627  | 1.030 | 8.281  | 10.434 |
| ENSG00000107485 | GATA3     | -1.7 | 1.3E-07  | 1.4E-06  | 7.623  | 0.615 | 6.886  | 8.193  | 12.452 | 1.557 | 11.378 | 14.680 |
| ENSG00000141665 | FBXO15    | -1.7 | 1.7E-03  | 0.00553  | 0.404  | 0.116 | 0.256  | 0.541  | 0.649  | 0.024 | 0.623  | 0.669  |
| ENSG00000010030 | ETV7      | -1.7 | 3.1E-05  | 0.00018  | 5.219  | 0.849 | 4.106  | 6.025  | 8.343  | 0.975 | 6.881  | 8.882  |
| ENSG00000178568 | ERBB4     | -1.7 | 2.6E-06  | 2E-05    | 1.346  | 0.304 | 0.916  | 1.615  | 2.344  | 0.286 | 2.028  | 2.586  |
| ENSG00000165617 | DACT1     | -1.7 | 1.4E-09  | 2.6E-08  | 6.691  | 0.653 | 6.088  | 7.348  | 11.473 | 0.434 | 10.827 | 11.726 |
| ENSG00000106258 | CYP3A5    | -1.7 | 9.7E-08  | 1.1E-06  | 3.552  | 0.368 | 3.022  | 3.846  | 6.036  | 0.210 | 5.815  | 6.216  |

|                 |           |      |         |          |        |       |        |        |        |       |        |        |
|-----------------|-----------|------|---------|----------|--------|-------|--------|--------|--------|-------|--------|--------|
| ENSG00000168772 | CXXC4     | -1.7 | 2.3E-06 | 1.8E-05  | 7.278  | 1.604 | 5.025  | 8.557  | 13.051 | 1.140 | 12.040 | 14.038 |
| ENSG00000164463 | CREBRF    | -1.7 | 2.6E-05 | 0.00015  | 5.770  | 1.304 | 3.840  | 6.626  | 9.072  | 0.432 | 8.575  | 9.629  |
| ENSG00000206561 | COLQ      | -1.7 | 2.4E-04 | 0.00105  | 1.248  | 0.203 | 1.058  | 1.522  | 2.232  | 0.295 | 1.919  | 2.484  |
| ENSG00000124749 | COL21A1   | -1.7 | 2.0E-05 | 0.00012  | 0.972  | 0.126 | 0.786  | 1.069  | 1.660  | 0.196 | 1.443  | 1.826  |
| ENSG00000158258 | CLSTN2    | -1.7 | 7.7E-06 | 5.4E-05  | 0.711  | 0.054 | 0.642  | 0.762  | 1.255  | 0.041 | 1.202  | 1.302  |
| ENSG00000106069 | CHN2      | -1.7 | 1.8E-05 | 0.00011  | 1.566  | 0.331 | 1.118  | 1.858  | 2.449  | 0.325 | 2.260  | 2.933  |
| ENSG00000008300 | CELSR3    | -1.7 | 8.1E-06 | 5.6E-05  | 0.853  | 0.185 | 0.648  | 1.087  | 1.363  | 0.115 | 1.265  | 1.483  |
| ENSG00000185267 | CDNF      | -1.7 | 2.8E-04 | 0.00121  | 2.131  | 0.279 | 1.747  | 2.373  | 3.953  | 0.645 | 3.354  | 4.511  |
| ENSG00000228409 | CCT6P1    | -1.7 | 6.2E-07 | 5.9E-06  | 14.375 | 2.625 | 11.229 | 17.428 | 24.681 | 1.192 | 24.010 | 26.462 |
| ENSG00000174898 | CATSPERD  | -1.7 | 1.3E-03 | 0.00431  | 1.092  | 0.298 | 0.754  | 1.398  | 1.803  | 0.218 | 1.605  | 2.114  |
| ENSG00000157445 | CACNA2D3  | -1.7 | 1.6E-07 | 1.8E-06  | 4.835  | 0.572 | 4.152  | 5.477  | 7.887  | 0.250 | 7.687  | 8.203  |
| ENSG00000230185 | C9orf147  | -1.7 | 4.7E-03 | 0.01317  | 1.225  | 0.262 | 0.944  | 1.573  | 1.948  | 0.405 | 1.672  | 2.530  |
| ENSG00000133639 | BTG1      | -1.7 | 6.3E-11 | 1.6E-09  | 17.568 | 0.877 | 16.556 | 18.695 | 28.357 | 1.059 | 27.086 | 29.679 |
| ENSG00000104081 | BMF       | -1.7 | 1.3E-12 | 5.23E-11 | 18.206 | 0.228 | 17.883 | 18.421 | 30.903 | 1.488 | 28.694 | 31.945 |
| ENSG00000066279 | ASPM      | -1.7 | 2.0E-02 | 0.04443  | 25.351 | 9.272 | 11.473 | 30.818 | 42.614 | 6.982 | 35.494 | 48.608 |
| ENSG00000138639 | ARHGAP24  | -1.7 | 1.6E-06 | 1.4E-05  | 2.251  | 0.260 | 1.971  | 2.497  | 3.674  | 0.210 | 3.420  | 3.933  |
| ENSG00000230002 | ALMS1-IT1 | -1.7 | 9.6E-05 | 0.00048  | 2.451  | 0.446 | 2.036  | 2.873  | 4.098  | 0.454 | 3.438  | 4.473  |
| ENSG00000161912 | ADCY10P1  | -1.7 | 3.6E-08 | 4.5E-07  | 3.776  | 0.259 | 3.405  | 4.004  | 6.419  | 0.564 | 5.776  | 6.892  |
| ENSG00000250546 |           | -1.7 | 2.0E-05 | 0.00012  | 2.338  | 0.383 | 1.816  | 2.670  | 4.316  | 0.390 | 3.813  | 4.624  |
| ENSG00000262251 |           | -1.7 | 5.3E-05 | 0.00029  | 5.547  | 0.898 | 4.355  | 6.494  | 9.310  | 0.030 | 9.264  | 9.326  |
| ENSG00000260077 |           | -1.7 | 8.4E-05 | 0.00043  | 6.588  | 2.010 | 4.359  | 9.242  | 10.712 | 1.122 | 9.743  | 11.791 |
| ENSG00000260103 |           | -1.7 | 1.2E-04 | 0.00061  | 2.279  | 0.094 | 2.160  | 2.370  | 3.670  | 0.718 | 3.064  | 4.470  |
| ENSG00000261557 |           | -1.7 | 2.1E-04 | 0.00093  | 5.271  | 0.914 | 4.294  | 6.299  | 8.154  | 1.353 | 7.053  | 10.129 |
| ENSG00000267419 |           | -1.7 | 4.1E-04 | 0.00166  | 2.220  | 0.557 | 1.417  | 2.691  | 4.060  | 0.378 | 3.535  | 4.336  |
| ENSG00000223855 |           | -1.7 | 6.9E-04 | 0.0026   | 0.923  | 0.177 | 0.695  | 1.122  | 1.455  | 0.265 | 1.274  | 1.836  |
| ENSG00000225793 |           | -1.7 | 7.4E-04 | 0.00277  | 1.778  | 0.164 | 1.604  | 1.940  | 2.860  | 0.661 | 2.416  | 3.815  |
| ENSG00000276900 |           | -1.7 | 8.5E-04 | 0.00308  | 1.913  | 0.523 | 1.240  | 2.470  | 3.203  | 0.436 | 2.827  | 3.623  |
| ENSG00000275620 |           | -1.7 | 9.6E-04 | 0.00343  | 0.441  | 0.150 | 0.299  | 0.637  | 0.756  | 0.017 | 0.740  | 0.780  |
| ENSG00000260265 |           | -1.7 | 1.1E-03 | 0.00375  | 3.039  | 1.025 | 1.538  | 3.709  | 5.206  | 0.478 | 4.942  | 5.921  |
| ENSG00000236829 |           | -1.7 | 1.1E-03 | 0.00392  | 1.502  | 0.148 | 1.363  | 1.651  | 2.804  | 0.164 | 2.600  | 2.937  |
| ENSG00000260526 |           | -1.7 | 1.4E-03 | 0.0048   | 1.293  | 0.149 | 1.122  | 1.483  | 2.228  | 0.239 | 1.897  | 2.469  |
| ENSG00000270558 |           | -1.7 | 1.8E-03 | 0.00576  | 6.142  | 1.155 | 5.150  | 7.811  | 10.764 | 1.526 | 9.128  | 12.063 |
| ENSG00000235609 |           | -1.7 | 2.1E-03 | 0.00675  | 0.604  | 0.149 | 0.385  | 0.721  | 0.975  | 0.183 | 0.715  | 1.103  |
| ENSG00000272070 |           | -1.7 | 2.8E-03 | 0.00856  | 0.713  | 0.133 | 0.532  | 0.843  | 1.149  | 0.216 | 0.869  | 1.397  |
| ENSG00000262728 |           | -1.7 | 3.7E-03 | 0.01075  | 1.944  | 0.465 | 1.545  | 2.616  | 3.117  | 0.585 | 2.723  | 3.963  |
| ENSG00000260572 |           | -1.7 | 3.8E-03 | 0.01098  | 1.388  | 0.600 | 0.888  | 2.148  | 2.183  | 0.062 | 2.107  | 2.233  |
| ENSG00000255471 |           | -1.7 | 4.1E-03 | 0.01154  | 1.776  | 0.402 | 1.375  | 2.299  | 2.842  | 0.243 | 2.511  | 3.095  |
| ENSG00000261732 |           | -1.7 | 4.3E-03 | 0.01202  | 0.398  | 0.130 | 0.298  | 0.581  | 0.675  | 0.119 | 0.570  | 0.779  |



|                 |           |      |         |          |         |        |         |         |         |        |         |         |
|-----------------|-----------|------|---------|----------|---------|--------|---------|---------|---------|--------|---------|---------|
| ENSG00000278000 |           | -1.7 | 5.0E-03 | 0.01367  | 3.566   | 0.243  | 3.221   | 3.784   | 6.066   | 1.238  | 4.377   | 7.356   |
| ENSG00000234345 |           | -1.7 | 5.9E-03 | 0.01573  | 1.739   | 0.615  | 1.017   | 2.455   | 2.961   | 0.425  | 2.740   | 3.597   |
| ENSG00000248027 |           | -1.7 | 6.3E-03 | 0.01663  | 0.897   | 0.163  | 0.682   | 1.062   | 1.452   | 0.195  | 1.283   | 1.640   |
| ENSG00000274422 |           | -1.7 | 8.8E-03 | 0.02202  | 4.359   | 1.227  | 2.783   | 5.743   | 8.551   | 1.913  | 6.861   | 10.208  |
| ENSG00000250222 |           | -1.7 | 9.2E-03 | 0.02288  | 5.647   | 1.495  | 4.048   | 6.974   | 7.356   | 2.644  | 5.909   | 11.312  |
| ENSG00000234329 |           | -1.7 | 1.1E-02 | 0.02576  | 2.977   | 1.123  | 1.412   | 4.058   | 5.707   | 1.035  | 4.290   | 6.479   |
| ENSG00000270933 |           | -1.7 | 1.2E-02 | 0.02845  | 3.249   | 1.067  | 2.127   | 4.660   | 4.587   | 1.245  | 3.631   | 6.249   |
| ENSG00000281195 |           | -1.7 | 1.3E-02 | 0.03009  | 1.782   | 0.665  | 1.226   | 2.738   | 3.359   | 1.131  | 1.751   | 4.149   |
| ENSG00000273038 |           | -1.7 | 1.4E-02 | 0.03188  | 1.051   | 0.455  | 0.618   | 1.692   | 1.954   | 0.214  | 1.643   | 2.094   |
| ENSG00000176723 | ZNF843    | -1.8 | 2.1E-03 | 0.00657  | 0.646   | 0.157  | 0.452   | 0.836   | 1.091   | 0.132  | 0.979   | 1.234   |
| ENSG00000168916 | ZNF608    | -1.8 | 6.2E-10 | 1.3E-08  | 11.509  | 1.537  | 9.390   | 13.069  | 20.287  | 1.169  | 18.882  | 21.250  |
| ENSG00000166432 | ZMAT1     | -1.8 | 1.2E-04 | 0.00057  | 2.134   | 0.525  | 1.417   | 2.638   | 4.055   | 0.761  | 3.387   | 4.714   |
| ENSG00000169554 | ZEB2      | -1.8 | 4.8E-09 | 7.7E-08  | 1.728   | 0.298  | 1.324   | 2.043   | 3.053   | 0.268  | 2.806   | 3.284   |
| ENSG00000166415 | WDR72     | -1.8 | 7.6E-04 | 0.00281  | 0.561   | 0.197  | 0.278   | 0.724   | 0.929   | 0.095  | 0.875   | 1.070   |
| ENSG00000038427 | VCAN      | -1.8 | 1.1E-05 | 7.1E-05  | 33.986  | 6.775  | 23.981  | 38.980  | 61.723  | 4.517  | 56.914  | 65.576  |
| ENSG00000171724 | VAT1L     | -1.8 | 5.6E-03 | 0.01502  | 0.517   | 0.191  | 0.293   | 0.730   | 0.972   | 0.173  | 0.778   | 1.118   |
| ENSG00000121297 | TSHZ3     | -1.8 | 4.2E-08 | 5.2E-07  | 4.198   | 0.083  | 4.129   | 4.319   | 7.269   | 0.585  | 6.774   | 7.914   |
| ENSG00000198846 | TOX       | -1.8 | 3.7E-03 | 0.01074  | 0.661   | 0.142  | 0.462   | 0.774   | 1.131   | 0.440  | 0.646   | 1.714   |
| ENSG00000162814 | SPATA17   | -1.8 | 6.1E-04 | 0.00235  | 0.691   | 0.275  | 0.317   | 0.976   | 1.253   | 0.269  | 0.914   | 1.469   |
| ENSG00000166922 | SCG5      | -1.8 | 6.4E-03 | 0.01686  | 0.779   | 0.162  | 0.579   | 0.965   | 1.377   | 0.137  | 1.173   | 1.453   |
| ENSG00000213363 | RPS3P6    | -1.8 | 3.8E-03 | 0.01095  | 3.400   | 1.397  | 1.827   | 5.122   | 5.995   | 0.842  | 4.744   | 6.577   |
| ENSG00000116574 | RHOU      | -1.8 | 1.7E-14 | 1.20E-12 | 38.177  | 1.437  | 36.059  | 39.254  | 67.865  | 2.004  | 65.350  | 69.479  |
| ENSG00000261126 | RBFADN    | -1.8 | 1.0E-03 | 0.00356  | 0.486   | 0.188  | 0.264   | 0.713   | 0.878   | 0.034  | 0.826   | 0.901   |
| ENSG00000077092 | RARB      | -1.8 | 3.3E-07 | 3.3E-06  | 3.240   | 0.450  | 2.708   | 3.807   | 5.414   | 0.456  | 4.876   | 5.991   |
| ENSG00000166473 | PKD1L2    | -1.8 | 6.2E-04 | 0.00238  | 0.141   | 0.022  | 0.114   | 0.162   | 0.233   | 0.008  | 0.225   | 0.244   |
| ENSG00000117461 | PIK3R3    | -1.8 | 9.6E-12 | 3.04E-10 | 13.513  | 1.467  | 11.581  | 14.856  | 23.739  | 1.056  | 22.157  | 24.315  |
| ENSG00000253305 | PCDHGB6   | -1.8 | 2.7E-04 | 0.00119  | 0.583   | 0.086  | 0.494   | 0.677   | 1.161   | 0.237  | 0.866   | 1.353   |
| ENSG00000116774 | OLFML3    | -1.8 | 1.2E-06 | 1.1E-05  | 5.027   | 0.802  | 3.995   | 5.851   | 8.397   | 1.083  | 7.465   | 9.472   |
| ENSG00000149294 | NCAM1     | -1.8 | 6.7E-13 | 2.98E-11 | 7.392   | 0.496  | 7.025   | 8.122   | 13.454  | 0.648  | 12.688  | 13.991  |
| ENSG00000101928 | MOSPD1    | -1.8 | 1.2E-12 | 4.88E-11 | 116.653 | 10.897 | 100.758 | 125.483 | 209.918 | 11.418 | 198.994 | 219.777 |
| ENSG00000153714 | LURAP1L   | -1.8 | 5.4E-04 | 0.0021   | 1.484   | 0.165  | 1.349   | 1.714   | 2.578   | 0.095  | 2.505   | 2.718   |
| ENSG00000254402 | LRRC24    | -1.8 | 2.5E-04 | 0.00111  | 1.976   | 0.131  | 1.879   | 2.162   | 3.255   | 0.535  | 2.453   | 3.546   |
| ENSG00000247675 | LRP4-AS1  | -1.8 | 8.9E-03 | 0.02229  | 1.159   | 0.174  | 0.913   | 1.321   | 1.824   | 0.526  | 1.384   | 2.433   |
| ENSG00000110031 | LPXN      | -1.8 | 8.0E-09 | 1.2E-07  | 7.240   | 0.785  | 6.120   | 7.885   | 13.155  | 1.014  | 12.266  | 14.033  |
| ENSG00000226476 | LINC01748 | -1.8 | 1.8E-06 | 1.5E-05  | 0.839   | 0.086  | 0.721   | 0.928   | 1.436   | 0.145  | 1.242   | 1.547   |
| ENSG00000236204 | LINC01376 | -1.8 | 5.4E-06 | 4E-05    | 2.921   | 0.754  | 1.931   | 3.677   | 5.203   | 0.466  | 4.559   | 5.546   |
| ENSG00000250337 | LINC01021 | -1.8 | 6.4E-05 | 0.00034  | 36.590  | 8.207  | 24.760  | 43.371  | 69.712  | 9.357  | 58.891  | 77.532  |
| ENSG00000185261 | KIAA0825  | -1.8 | 6.8E-04 | 0.00258  | 0.417   | 0.123  | 0.321   | 0.596   | 0.743   | 0.044  | 0.705   | 0.789   |

|                 |            |      |         |          |        |       |        |        |        |       |        |        |
|-----------------|------------|------|---------|----------|--------|-------|--------|--------|--------|-------|--------|--------|
| ENSG00000128052 | KDR        | -1.8 | 3.0E-03 | 0.00884  | 0.400  | 0.108 | 0.279  | 0.494  | 0.713  | 0.149 | 0.586  | 0.874  |
| ENSG00000272767 | JMJD1C-AS1 | -1.8 | 9.8E-04 | 0.0035   | 2.170  | 0.520 | 1.587  | 2.852  | 3.756  | 0.361 | 3.255  | 4.118  |
| ENSG00000144668 | ITGA9      | -1.8 | 7.8E-06 | 5.4E-05  | 0.752  | 0.119 | 0.644  | 0.922  | 1.323  | 0.095 | 1.186  | 1.388  |
| ENSG00000236778 | INTS6-AS1  | -1.8 | 1.1E-05 | 7.1E-05  | 0.669  | 0.093 | 0.571  | 0.773  | 1.204  | 0.118 | 1.051  | 1.338  |
| ENSG00000254289 | IGHV3-32   | -1.8 | 3.5E-05 | 0.0002   | 13.509 | 3.674 | 9.625  | 18.472 | 25.033 | 2.956 | 21.757 | 28.942 |
| ENSG00000270276 | HIST2H4B   | -1.8 | 3.4E-11 | 9.15E-10 | 29.276 | 2.637 | 26.622 | 32.660 | 51.871 | 0.882 | 50.596 | 52.626 |
| ENSG00000270882 | HIST2H4A   | -1.8 | 3.0E-11 | 8.32E-10 | 30.392 | 2.552 | 27.724 | 33.739 | 53.350 | 0.763 | 52.389 | 54.255 |
| ENSG00000274750 | HIST1H3E   | -1.8 | 5.1E-08 | 6.2E-07  | 5.976  | 0.471 | 5.457  | 6.546  | 10.382 | 1.014 | 9.854  | 11.903 |
| ENSG00000124635 | HIST1H2BJ  | -1.8 | 3.6E-08 | 4.5E-07  | 16.198 | 2.526 | 12.744 | 18.595 | 28.627 | 0.595 | 28.129 | 29.312 |
| ENSG00000214544 | GTF2IRD2P1 | -1.8 | 2.6E-04 | 0.00113  | 0.651  | 0.082 | 0.592  | 0.773  | 1.237  | 0.162 | 0.994  | 1.323  |
| ENSG00000180447 | GAS1       | -1.8 | 1.0E-10 | 2.4E-09  | 10.802 | 0.414 | 10.451 | 11.349 | 18.478 | 0.421 | 18.115 | 18.892 |
| ENSG00000130222 | GADD45G    | -1.8 | 8.6E-06 | 5.9E-05  | 7.645  | 1.713 | 5.351  | 9.497  | 13.920 | 0.753 | 13.189 | 14.976 |
| ENSG00000116717 | GADD45A    | -1.8 | 1.9E-11 | 5.47E-10 | 51.966 | 2.891 | 49.289 | 56.071 | 91.402 | 3.945 | 86.930 | 96.547 |
| ENSG00000054598 | FOXC1      | -1.8 | 9.5E-12 | 3.01E-10 | 26.868 | 0.834 | 25.634 | 27.463 | 47.052 | 2.399 | 44.972 | 49.130 |
| ENSG00000125848 | FLRT3      | -1.8 | 1.6E-06 | 1.3E-05  | 2.632  | 0.449 | 2.266  | 3.286  | 4.746  | 0.587 | 3.877  | 5.103  |
| ENSG00000102678 | FGF9       | -1.8 | 3.3E-05 | 0.00019  | 1.684  | 0.234 | 1.376  | 1.916  | 3.027  | 0.210 | 2.769  | 3.199  |
| ENSG00000165323 | FAT3       | -1.8 | 3.4E-07 | 3.4E-06  | 5.886  | 1.068 | 4.393  | 6.931  | 10.903 | 0.485 | 10.419 | 11.320 |
| ENSG00000283709 | FAM238C    | -1.8 | 1.8E-04 | 0.00081  | 0.949  | 0.104 | 0.831  | 1.037  | 1.875  | 0.460 | 1.473  | 2.273  |
| ENSG00000044524 | EPHA3      | -1.8 | 3.6E-08 | 4.5E-07  | 6.970  | 1.285 | 5.072  | 7.823  | 11.856 | 0.323 | 11.462 | 12.120 |
| ENSG00000128512 | DOCK4      | -1.8 | 1.1E-07 | 1.3E-06  | 3.753  | 0.755 | 2.723  | 4.541  | 6.555  | 0.123 | 6.420  | 6.660  |
| ENSG00000224165 | DNAJC27-AS | -1.8 | 2.9E-03 | 0.00864  | 0.382  | 0.167 | 0.225  | 0.589  | 0.705  | 0.030 | 0.667  | 0.741  |
| ENSG00000276644 | DACH1      | -1.8 | 4.0E-08 | 5E-07    | 4.445  | 0.647 | 3.674  | 5.223  | 8.239  | 0.814 | 7.437  | 8.941  |
| ENSG00000259736 | CRTC3-AS1  | -1.8 | 7.7E-03 | 0.01964  | 1.967  | 0.760 | 1.232  | 2.989  | 3.330  | 0.253 | 3.167  | 3.700  |
| ENSG00000215018 | COL28A1    | -1.8 | 1.4E-04 | 0.00065  | 0.450  | 0.037 | 0.423  | 0.504  | 0.782  | 0.152 | 0.651  | 0.926  |
| ENSG00000254413 | CHKB-CPT1B | -1.8 | 1.5E-02 | 0.03505  | 0.394  | 0.106 | 0.293  | 0.512  | 0.609  | 0.322 | 0.381  | 1.063  |
| ENSG00000159409 | CELF3      | -1.8 | 2.8E-03 | 0.00833  | 0.365  | 0.102 | 0.223  | 0.465  | 0.709  | 0.014 | 0.689  | 0.719  |
| ENSG00000123080 | CDKN2C     | -1.8 | 2.0E-13 | 1.06E-11 | 29.444 | 0.975 | 28.549 | 30.514 | 50.212 | 0.837 | 49.283 | 50.920 |
| ENSG00000164076 | CAMKV      | -1.8 | 9.1E-03 | 0.02273  | 0.487  | 0.180 | 0.234  | 0.642  | 0.889  | 0.198 | 0.604  | 1.023  |
| ENSG00000106804 | C5         | -1.8 | 8.4E-07 | 7.7E-06  | 2.085  | 0.267 | 1.800  | 2.340  | 3.672  | 0.566 | 2.909  | 4.103  |
| ENSG00000163009 | C2orf48    | -1.8 | 2.4E-05 | 0.00015  | 2.966  | 0.411 | 2.513  | 3.510  | 5.305  | 0.666 | 4.837  | 6.293  |
| ENSG00000214212 | C19orf38   | -1.8 | 1.2E-03 | 0.00417  | 1.917  | 0.793 | 1.320  | 3.017  | 3.665  | 0.307 | 3.466  | 4.114  |
| ENSG00000143032 | BARHL2     | -1.8 | 1.3E-03 | 0.00435  | 1.076  | 0.150 | 0.883  | 1.231  | 1.811  | 0.230 | 1.612  | 2.033  |
| ENSG00000150347 | ARID5B     | -1.8 | 6.5E-11 | 1.6E-09  | 12.826 | 1.694 | 10.356 | 14.170 | 22.090 | 0.466 | 21.665 | 22.493 |
| ENSG00000103723 | AP3B2      | -1.8 | 1.7E-04 | 0.0008   | 0.848  | 0.049 | 0.798  | 0.914  | 1.650  | 0.185 | 1.435  | 1.888  |
| ENSG00000163126 | ANKRD23    | -1.8 | 6.9E-04 | 0.00259  | 0.674  | 0.135 | 0.555  | 0.846  | 1.171  | 0.190 | 1.047  | 1.447  |
| ENSG00000215559 | ANKRD20A1  | -1.8 | 1.0E-04 | 0.00052  | 1.119  | 0.366 | 0.831  | 1.651  | 2.020  | 0.166 | 1.784  | 2.136  |
| ENSG00000101745 | ANKRD12    | -1.8 | 1.6E-02 | 0.03715  | 4.255  | 1.649 | 1.855  | 5.509  | 7.959  | 1.465 | 6.064  | 9.115  |
| ENSG00000170214 | ADRA1B     | -1.8 | 9.9E-04 | 0.00352  | 2.796  | 0.854 | 1.916  | 3.932  | 4.749  | 0.841 | 3.615  | 5.649  |

|                 |            |      |         |          |        |       |        |        |         |       |         |         |
|-----------------|------------|------|---------|----------|--------|-------|--------|--------|---------|-------|---------|---------|
| ENSG00000150471 | ADGRL3     | -1.8 | 9.5E-10 | 1.8E-08  | 2.265  | 0.271 | 1.863  | 2.434  | 4.075   | 0.301 | 3.762   | 4.333   |
| ENSG00000185736 | ADARB2     | -1.8 | 9.1E-05 | 0.00046  | 0.528  | 0.105 | 0.423  | 0.666  | 1.016   | 0.192 | 0.747   | 1.153   |
| ENSG00000165029 | ABCA1      | -1.8 | 5.2E-07 | 5E-06    | 1.273  | 0.273 | 0.924  | 1.545  | 2.225   | 0.072 | 2.117   | 2.263   |
| ENSG00000272341 |            | -1.8 | 3.0E-07 | 3.1E-06  | 6.209  | 0.768 | 5.640  | 7.334  | 10.998  | 0.893 | 10.021  | 11.755  |
| ENSG00000251634 |            | -1.8 | 1.2E-06 | 1.1E-05  | 3.014  | 0.557 | 2.188  | 3.404  | 5.221   | 0.164 | 5.077   | 5.363   |
| ENSG00000248583 |            | -1.8 | 6.9E-06 | 4.9E-05  | 8.867  | 1.578 | 7.258  | 10.368 | 15.161  | 0.798 | 14.485  | 16.041  |
| ENSG00000279522 |            | -1.8 | 1.3E-05 | 8.5E-05  | 2.910  | 0.308 | 2.555  | 3.238  | 5.028   | 0.284 | 4.631   | 5.305   |
| ENSG00000232611 |            | -1.8 | 2.5E-05 | 0.00015  | 1.737  | 0.243 | 1.422  | 2.006  | 3.137   | 0.409 | 2.880   | 3.747   |
| ENSG00000279900 |            | -1.8 | 1.2E-04 | 0.0006   | 9.473  | 2.203 | 6.329  | 11.411 | 16.376  | 2.451 | 12.820  | 18.001  |
| ENSG00000266680 |            | -1.8 | 1.3E-04 | 0.00063  | 5.046  | 1.363 | 3.962  | 7.033  | 9.309   | 1.952 | 6.937   | 10.909  |
| ENSG00000263080 |            | -1.8 | 2.2E-04 | 0.001    | 4.068  | 0.304 | 3.639  | 4.297  | 7.834   | 1.692 | 6.095   | 9.285   |
| ENSG00000251661 |            | -1.8 | 4.0E-04 | 0.00161  | 2.042  | 0.613 | 1.484  | 2.865  | 3.654   | 0.123 | 3.551   | 3.796   |
| ENSG00000214243 |            | -1.8 | 4.1E-04 | 0.00167  | 4.445  | 0.715 | 3.463  | 5.157  | 7.600   | 0.529 | 6.849   | 7.971   |
| ENSG00000240291 |            | -1.8 | 7.1E-04 | 0.00267  | 2.646  | 0.622 | 1.917  | 3.368  | 4.952   | 0.892 | 3.679   | 5.571   |
| ENSG00000271133 |            | -1.8 | 7.2E-04 | 0.0027   | 2.082  | 0.185 | 1.858  | 2.303  | 3.556   | 0.180 | 3.331   | 3.773   |
| ENSG00000258457 |            | -1.8 | 7.3E-04 | 0.00272  | 3.286  | 0.470 | 2.588  | 3.587  | 6.370   | 0.383 | 5.945   | 6.876   |
| ENSG00000229127 |            | -1.8 | 9.1E-04 | 0.00327  | 2.032  | 0.744 | 1.156  | 2.839  | 3.911   | 1.129 | 2.635   | 4.861   |
| ENSG00000204666 |            | -1.8 | 1.2E-03 | 0.00415  | 1.481  | 0.390 | 1.098  | 1.980  | 2.715   | 0.396 | 2.217   | 3.034   |
| ENSG00000267370 |            | -1.8 | 1.4E-03 | 0.00482  | 3.103  | 0.657 | 2.139  | 3.613  | 5.713   | 1.321 | 3.751   | 6.498   |
| ENSG00000263280 |            | -1.8 | 1.6E-03 | 0.00526  | 4.471  | 1.422 | 2.496  | 5.718  | 7.885   | 0.719 | 6.830   | 8.446   |
| ENSG00000249721 |            | -1.8 | 1.7E-03 | 0.00555  | 6.884  | 3.076 | 2.451  | 9.471  | 12.994  | 0.773 | 12.414  | 14.133  |
| ENSG00000255435 |            | -1.8 | 2.6E-03 | 0.00795  | 1.589  | 0.251 | 1.357  | 1.867  | 2.718   | 0.390 | 2.138   | 2.981   |
| ENSG00000237732 |            | -1.8 | 2.9E-03 | 0.00859  | 0.745  | 0.161 | 0.574  | 0.929  | 1.242   | 0.164 | 1.040   | 1.442   |
| ENSG00000249655 |            | -1.8 | 4.0E-03 | 0.01131  | 3.586  | 1.365 | 2.219  | 4.832  | 7.045   | 1.458 | 4.864   | 7.846   |
| ENSG00000259723 |            | -1.8 | 5.2E-03 | 0.0141   | 5.075  | 1.890 | 2.304  | 6.526  | 7.891   | 1.631 | 6.159   | 10.097  |
| ENSG00000240731 |            | -1.8 | 5.6E-03 | 0.015    | 5.341  | 0.894 | 4.200  | 6.273  | 11.248  | 3.240 | 8.340   | 14.053  |
| ENSG00000272030 |            | -1.8 | 1.6E-02 | 0.03601  | 2.299  | 0.873 | 1.149  | 3.016  | 4.089   | 1.236 | 2.235   | 4.734   |
| ENSG00000237149 | ZNF503-AS2 | -1.9 | 2.3E-06 | 1.9E-05  | 3.587  | 0.686 | 3.093  | 4.578  | 6.557   | 0.786 | 5.489   | 7.148   |
| ENSG00000152763 | WDR78      | -1.9 | 3.3E-05 | 0.00019  | 1.407  | 0.374 | 1.114  | 1.941  | 2.512   | 0.524 | 2.070   | 3.097   |
| ENSG00000182168 | UNC5C      | -1.9 | 6.7E-09 | 1E-07    | 2.374  | 0.353 | 2.067  | 2.883  | 4.386   | 0.321 | 4.037   | 4.659   |
| ENSG00000133710 | SPINK5     | -1.9 | 2.4E-08 | 3.2E-07  | 3.113  | 0.506 | 2.394  | 3.558  | 6.032   | 0.642 | 5.070   | 6.373   |
| ENSG00000134532 | SOX5       | -1.9 | 1.8E-07 | 2E-06    | 1.226  | 0.095 | 1.144  | 1.329  | 2.216   | 0.280 | 1.812   | 2.457   |
| ENSG00000124766 | SOX4       | -1.9 | 8.6E-14 | 5.04E-12 | 68.681 | 5.271 | 62.731 | 74.516 | 125.366 | 4.712 | 121.005 | 129.442 |
| ENSG00000176887 | SOX11      | -1.9 | 5.5E-11 | 1.4E-09  | 6.175  | 0.752 | 5.380  | 6.862  | 11.318  | 0.445 | 10.652  | 11.566  |
| ENSG00000148942 | SLC5A12    | -1.9 | 9.0E-05 | 0.00045  | 0.583  | 0.106 | 0.442  | 0.684  | 1.108   | 0.091 | 1.003   | 1.184   |
| ENSG00000139209 | SLC38A4    | -1.9 | 3.2E-05 | 0.00018  | 1.085  | 0.231 | 0.767  | 1.280  | 2.114   | 0.275 | 1.819   | 2.348   |
| ENSG00000106483 | SFRP4      | -1.9 | 4.7E-04 | 0.00187  | 0.657  | 0.115 | 0.490  | 0.749  | 1.192   | 0.132 | 1.027   | 1.350   |
| ENSG00000152217 | SETBP1     | -1.9 | 4.0E-09 | 6.7E-08  | 3.089  | 0.293 | 2.751  | 3.393  | 5.680   | 0.427 | 5.322   | 6.170   |

|                 |             |      |         |          |        |       |        |         |         |       |         |         |
|-----------------|-------------|------|---------|----------|--------|-------|--------|---------|---------|-------|---------|---------|
| ENSG00000243819 | RN7SL832P   | -1.9 | 1.3E-04 | 0.00062  | 1.298  | 0.295 | 0.996  | 1.648   | 2.517   | 0.034 | 2.475   | 2.544   |
| ENSG00000268006 | PTOV1-AS1   | -1.9 | 1.0E-06 | 9.2E-06  | 1.758  | 0.078 | 1.656  | 1.823   | 3.514   | 0.477 | 2.949   | 3.910   |
| ENSG00000164708 | PGAM2       | -1.9 | 1.5E-04 | 0.00071  | 3.461  | 0.723 | 2.488  | 4.062   | 6.038   | 0.743 | 5.399   | 6.782   |
| ENSG00000049246 | PER3        | -1.9 | 3.9E-10 | 8.2E-09  | 4.297  | 0.409 | 3.767  | 4.765   | 8.123   | 0.659 | 7.135   | 8.470   |
| ENSG00000189184 | PCDH18      | -1.9 | 3.2E-09 | 5.5E-08  | 3.978  | 0.590 | 3.375  | 4.715   | 7.203   | 0.418 | 6.909   | 7.824   |
| ENSG00000185630 | PBX1        | -1.9 | 1.8E-13 | 9.80E-12 | 9.139  | 0.810 | 7.958  | 9.776   | 17.534  | 1.021 | 16.455  | 18.406  |
| ENSG00000085465 | OVGP1       | -1.9 | 4.4E-07 | 4.3E-06  | 3.367  | 0.297 | 2.966  | 3.674   | 6.235   | 0.312 | 5.966   | 6.548   |
| ENSG00000099250 | NRP1        | -1.9 | 4.6E-13 | 2.11E-11 | 11.432 | 0.874 | 10.179 | 12.215  | 21.682  | 1.406 | 20.243  | 22.888  |
| ENSG00000247809 | NR2F2-AS1   | -1.9 | 1.3E-05 | 8.6E-05  | 0.773  | 0.111 | 0.656  | 0.899   | 1.268   | 0.099 | 1.184   | 1.381   |
| ENSG00000176771 | NCKAP5      | -1.9 | 1.8E-08 | 2.5E-07  | 1.335  | 0.195 | 1.215  | 1.626   | 2.483   | 0.153 | 2.405   | 2.713   |
| ENSG00000143995 | MEIS1       | -1.9 | 4.9E-10 | 1E-08    | 2.710  | 0.310 | 2.326  | 3.019   | 5.140   | 0.484 | 4.446   | 5.472   |
| ENSG00000130518 | KIAA1683    | -1.9 | 2.5E-08 | 3.4E-07  | 1.239  | 0.094 | 1.165  | 1.372   | 2.427   | 0.121 | 2.335   | 2.591   |
| ENSG00000267365 | KCNJ2-AS1   | -1.9 | 2.0E-04 | 0.00092  | 1.373  | 0.333 | 1.123  | 1.859   | 2.414   | 0.077 | 2.316   | 2.505   |
| ENSG00000090376 | IRAK3       | -1.9 | 1.1E-02 | 0.02563  | 0.209  | 0.104 | 0.061  | 0.303   | 0.426   | 0.067 | 0.330   | 0.483   |
| ENSG00000196890 | HIST3H2BB   | -1.9 | 3.8E-06 | 2.9E-05  | 2.044  | 0.324 | 1.664  | 2.454   | 3.797   | 0.115 | 3.677   | 3.954   |
| ENSG00000187837 | HIST1H1C    | -1.9 | 1.2E-11 | 3.76E-10 | 97.292 | 4.365 | 90.852 | 100.541 | 174.671 | 7.779 | 168.983 | 185.463 |
| ENSG00000134363 | FST         | -1.9 | 5.2E-05 | 0.00028  | 1.899  | 0.552 | 1.390  | 2.651   | 3.594   | 0.119 | 3.416   | 3.654   |
| ENSG00000168386 | FILIP1L     | -1.9 | 2.2E-05 | 0.00013  | 0.970  | 0.243 | 0.619  | 1.179   | 1.850   | 0.305 | 1.437   | 2.081   |
| ENSG00000196159 | FAT4        | -1.9 | 3.3E-07 | 3.3E-06  | 6.756  | 1.225 | 5.085  | 7.996   | 13.033  | 0.653 | 12.083  | 13.461  |
| ENSG00000116106 | EPHA4       | -1.9 | 1.4E-10 | 3.3E-09  | 6.137  | 0.543 | 5.344  | 6.572   | 11.240  | 0.925 | 10.356  | 12.038  |
| ENSG00000242689 | CNTF        | -1.9 | 3.9E-05 | 0.00022  | 2.395  | 0.335 | 2.023  | 2.814   | 4.493   | 0.840 | 3.824   | 5.723   |
| ENSG00000240498 | CDKN2B-AS1  | -1.9 | 6.8E-09 | 1.1E-07  | 2.775  | 0.307 | 2.559  | 3.224   | 5.193   | 0.414 | 4.800   | 5.551   |
| ENSG00000129757 | CDKN1C      | -1.9 | 9.2E-10 | 1.8E-08  | 7.564  | 0.501 | 7.008  | 8.173   | 13.591  | 0.613 | 13.009  | 14.457  |
| ENSG00000150394 | CDH8        | -1.9 | 9.2E-06 | 6.3E-05  | 0.395  | 0.079 | 0.289  | 0.475   | 0.742   | 0.124 | 0.627   | 0.849   |
| ENSG00000272398 | CD24        | -1.9 | 8.3E-02 | 0.1415   | 2.469  | 0.144 | 2.335  | 2.665   | 4.201   | 2.674 | 2.850   | 8.212   |
| ENSG00000234585 | CCT6P3      | -1.9 | 3.6E-09 | 6.1E-08  | 3.653  | 0.220 | 3.365  | 3.899   | 6.629   | 0.249 | 6.264   | 6.790   |
| ENSG00000133101 | CCNA1       | -1.9 | 8.8E-08 | 1E-06    | 5.542  | 0.196 | 5.342  | 5.774   | 9.784   | 1.497 | 8.509   | 11.388  |
| ENSG00000179397 | CATSPERE    | -1.9 | 4.5E-03 | 0.01248  | 0.342  | 0.097 | 0.220  | 0.422   | 0.607   | 0.152 | 0.479   | 0.780   |
| ENSG00000167995 | BEST1       | -1.9 | 1.2E-07 | 1.4E-06  | 1.031  | 0.109 | 0.913  | 1.148   | 1.941   | 0.162 | 1.697   | 2.028   |
| ENSG00000162373 | BEND5       | -1.9 | 3.4E-04 | 0.00142  | 1.212  | 0.198 | 0.920  | 1.353   | 2.106   | 0.434 | 1.791   | 2.710   |
| ENSG00000258655 | ARHGAP5-AS1 | -1.9 | 7.7E-06 | 5.4E-05  | 3.642  | 0.315 | 3.354  | 4.067   | 6.282   | 1.224 | 5.313   | 8.075   |
| ENSG00000259456 | ADNP-AS1    | -1.9 | 7.2E-03 | 0.01866  | 1.975  | 0.417 | 1.479  | 2.400   | 3.144   | 1.132 | 1.525   | 4.167   |
| ENSG00000270605 |             | -1.9 | 5.5E-09 | 8.8E-08  | 10.756 | 1.023 | 9.474  | 11.905  | 19.675  | 0.961 | 18.817  | 20.506  |
| ENSG00000279865 |             | -1.9 | 2.5E-05 | 0.00015  | 1.893  | 0.116 | 1.794  | 2.050   | 3.425   | 0.148 | 3.306   | 3.612   |
| ENSG00000255363 |             | -1.9 | 5.6E-04 | 0.00219  | 1.284  | 0.369 | 0.854  | 1.755   | 2.101   | 0.296 | 1.850   | 2.426   |
| ENSG00000236654 |             | -1.9 | 5.8E-04 | 0.00224  | 12.764 | 3.701 | 8.773  | 16.890  | 25.574  | 1.346 | 23.717  | 26.939  |
| ENSG00000250753 |             | -1.9 | 1.1E-03 | 0.00384  | 6.997  | 2.677 | 4.527  | 9.884   | 14.196  | 1.009 | 12.716  | 14.992  |
| ENSG00000273759 |             | -1.9 | 1.8E-03 | 0.00582  | 2.805  | 0.515 | 2.113  | 3.353   | 4.826   | 1.373 | 3.771   | 6.657   |

|                 |            |      |         |          |         |       |         |         |         |       |         |         |
|-----------------|------------|------|---------|----------|---------|-------|---------|---------|---------|-------|---------|---------|
| ENSG00000214432 |            | -1.9 | 2.0E-03 | 0.00632  | 0.579   | 0.091 | 0.485   | 0.695   | 1.056   | 0.316 | 0.791   | 1.420   |
| ENSG00000279659 |            | -1.9 | 1.6E-02 | 0.03704  | 0.851   | 0.236 | 0.645   | 1.189   | 2.045   | 0.496 | 1.362   | 2.411   |
| ENSG00000272054 |            | -1.9 | 1.9E-02 | 0.04229  | 0.478   | 0.209 | 0.209   | 0.716   | 0.954   | 0.154 | 0.867   | 1.185   |
| ENSG00000280010 |            | -1.9 | 2.1E-02 | 0.04511  | 1.497   | 0.865 | 0.553   | 2.645   | 2.591   | 1.138 | 1.723   | 4.267   |
| ENSG0000026025  | VIM        | -2   | 1.7E-15 | 1.69E-13 | 171.678 | 6.813 | 165.429 | 181.380 | 340.579 | 7.338 | 330.942 | 346.298 |
| ENSG00000181449 | SOX2       | -2   | 5.7E-12 | 1.93E-10 | 15.304  | 1.335 | 13.878  | 17.006  | 29.536  | 1.595 | 28.119  | 30.918  |
| ENSG00000198732 | SMOC1      | -2   | 4.7E-09 | 7.7E-08  | 7.987   | 0.968 | 6.693   | 9.040   | 14.749  | 1.891 | 13.146  | 16.826  |
| ENSG00000149212 | SESN3      | -2   | 6.9E-06 | 4.9E-05  | 38.510  | 8.203 | 26.514  | 44.128  | 77.638  | 6.782 | 70.716  | 83.459  |
| ENSG00000257557 | PPP1R12A-A | -2   | 1.0E-04 | 0.00052  | 0.685   | 0.129 | 0.501   | 0.801   | 1.269   | 0.074 | 1.166   | 1.344   |
| ENSG00000170836 | PPM1D      | -2   | 1.3E-14 | 9.20E-13 | 36.154  | 1.711 | 34.437  | 38.011  | 69.966  | 2.472 | 66.568  | 71.799  |
| ENSG00000151623 | NR3C2      | -2   | 5.1E-12 | 1.77E-10 | 6.437   | 0.644 | 5.508   | 6.915   | 12.452  | 0.722 | 11.986  | 13.528  |
| ENSG00000237187 | NR2F1-AS1  | -2   | 1.1E-09 | 2.1E-08  | 1.882   | 0.189 | 1.647   | 2.111   | 3.683   | 0.097 | 3.561   | 3.761   |
| ENSG00000165555 | NOXRED1    | -2   | 1.0E-03 | 0.00356  | 0.810   | 0.217 | 0.591   | 1.093   | 1.375   | 0.309 | 1.152   | 1.809   |
| ENSG00000169184 | MN1        | -2   | 1.0E-10 | 2.5E-09  | 5.372   | 0.192 | 5.107   | 5.567   | 11.142  | 0.425 | 10.545  | 11.448  |
| ENSG00000255248 | MIR100HG   | -2   | 3.6E-05 | 0.00021  | 0.356   | 0.057 | 0.289   | 0.429   | 0.705   | 0.073 | 0.628   | 0.768   |
| ENSG00000183496 | MEX3B      | -2   | 3.6E-12 | 1.29E-10 | 9.284   | 0.788 | 8.445   | 10.300  | 17.605  | 0.913 | 16.306  | 18.242  |
| ENSG00000233639 | LINC01158  | -2   | 1.4E-03 | 0.00481  | 2.302   | 0.674 | 1.624   | 3.228   | 4.339   | 0.235 | 4.159   | 4.653   |
| ENSG00000123700 | KCNJ2      | -2   | 2.1E-07 | 2.3E-06  | 1.304   | 0.149 | 1.085   | 1.400   | 2.590   | 0.342 | 2.078   | 2.775   |
| ENSG00000233822 | HIST1H2BN  | -2   | 5.1E-08 | 6.3E-07  | 1.585   | 0.144 | 1.474   | 1.796   | 3.298   | 0.043 | 3.262   | 3.350   |
| ENSG00000236993 | GAPDHP21   | -2   | 3.0E-05 | 0.00018  | 2.935   | 0.465 | 2.413   | 3.356   | 5.833   | 0.260 | 5.687   | 6.221   |
| ENSG00000128573 | FOXP2      | -2   | 1.7E-06 | 1.4E-05  | 2.756   | 0.700 | 1.712   | 3.176   | 5.641   | 0.128 | 5.495   | 5.749   |
| ENSG00000228314 | CYP4F29P   | -2   | 3.7E-03 | 0.01075  | 0.954   | 0.491 | 0.463   | 1.631   | 2.088   | 0.202 | 1.967   | 2.391   |
| ENSG00000183230 | CTNNA3     | -2   | 1.5E-03 | 0.00497  | 0.163   | 0.071 | 0.071   | 0.232   | 0.339   | 0.065 | 0.246   | 0.395   |
| ENSG00000168542 | COL3A1     | -2   | 5.1E-13 | 2.34E-11 | 8.442   | 0.529 | 7.871   | 8.958   | 16.231  | 0.762 | 15.647  | 17.251  |
| ENSG00000213760 | ATP6V1G2   | -2   | 4.7E-08 | 5.8E-07  | 3.826   | 0.423 | 3.257   | 4.229   | 7.397   | 0.345 | 7.122   | 7.902   |
| ENSG00000261716 |            | -2   | 1.4E-10 | 3.3E-09  | 8.430   | 1.314 | 6.494   | 9.394   | 17.171  | 0.930 | 16.274  | 17.973  |
| ENSG00000251095 |            | -2   | 1.8E-09 | 3.3E-08  | 11.599  | 2.214 | 8.353   | 13.341  | 22.492  | 0.847 | 21.244  | 23.139  |
| ENSG00000220323 |            | -2   | 2.5E-07 | 2.6E-06  | 9.514   | 0.883 | 8.704   | 10.385  | 19.325  | 1.551 | 17.100  | 20.387  |
| ENSG00000203819 |            | -2   | 2.8E-06 | 2.2E-05  | 9.613   | 2.199 | 6.713   | 11.947  | 18.318  | 2.453 | 16.229  | 20.953  |
| ENSG00000270681 |            | -2   | 6.6E-06 | 4.8E-05  | 4.001   | 0.260 | 3.807   | 4.369   | 7.149   | 0.934 | 5.785   | 7.903   |
| ENSG00000257261 |            | -2   | 7.7E-05 | 0.0004   | 1.267   | 0.132 | 1.155   | 1.427   | 2.591   | 0.334 | 2.096   | 2.794   |
| ENSG00000230699 |            | -2   | 2.8E-04 | 0.00122  | 2.009   | 0.523 | 1.451   | 2.712   | 4.268   | 1.192 | 3.097   | 5.295   |
| ENSG00000234537 |            | -2   | 5.8E-03 | 0.01541  | 0.692   | 0.313 | 0.341   | 1.063   | 1.153   | 0.458 | 0.771   | 1.686   |
| ENSG00000056487 | PHF21B     | -2.1 | 7.6E-04 | 0.00282  | 0.499   | 0.111 | 0.424   | 0.663   | 0.954   | 0.367 | 0.638   | 1.311   |
| ENSG00000262096 | PCDHB19P   | -2.1 | 2.0E-04 | 0.0009   | 0.745   | 0.220 | 0.535   | 1.028   | 1.463   | 0.206 | 1.258   | 1.641   |
| ENSG00000181143 | MUC16      | -2.1 | 1.9E-04 | 0.00087  | 0.046   | 0.016 | 0.034   | 0.069   | 0.094   | 0.013 | 0.084   | 0.108   |
| ENSG00000233930 | KRTAP5-AS1 | -2.1 | 1.7E-04 | 0.00078  | 0.678   | 0.106 | 0.553   | 0.813   | 1.564   | 0.229 | 1.233   | 1.757   |
| ENSG00000099251 | HSD17B7P2  | -2.1 | 9.0E-10 | 1.8E-08  | 12.246  | 2.146 | 9.761   | 14.621  | 25.578  | 2.251 | 22.530  | 27.279  |

|                 |           |      |         |          |        |       |        |        |         |       |         |         |
|-----------------|-----------|------|---------|----------|--------|-------|--------|--------|---------|-------|---------|---------|
| ENSG00000180596 | HIST1H2BC | -2.1 | 1.5E-05 | 9.5E-05  | 2.926  | 0.246 | 2.722  | 3.239  | 6.057   | 0.999 | 4.632   | 6.969   |
| ENSG00000265962 | GACAT2    | -2.1 | 4.8E-05 | 0.00026  | 3.389  | 0.455 | 2.914  | 3.963  | 6.875   | 1.584 | 4.801   | 8.658   |
| ENSG00000107105 | ELAVL2    | -2.1 | 1.1E-04 | 0.00054  | 0.546  | 0.179 | 0.340  | 0.766  | 1.177   | 0.179 | 0.908   | 1.273   |
| ENSG00000164309 | CMYA5     | -2.1 | 7.6E-06 | 5.3E-05  | 0.310  | 0.089 | 0.202  | 0.406  | 0.663   | 0.025 | 0.641   | 0.687   |
| ENSG00000095585 | BLNK      | -2.1 | 3.1E-04 | 0.00133  | 0.702  | 0.201 | 0.580  | 1.000  | 1.722   | 0.341 | 1.332   | 2.008   |
| ENSG00000141431 | ASXL3     | -2.1 | 1.1E-07 | 1.2E-06  | 0.870  | 0.165 | 0.669  | 1.058  | 1.899   | 0.165 | 1.748   | 2.041   |
| ENSG00000154736 | ADAMTS5   | -2.1 | 1.1E-08 | 1.6E-07  | 0.793  | 0.091 | 0.723  | 0.928  | 1.601   | 0.090 | 1.509   | 1.724   |
| ENSG00000272993 |           | -2.1 | 1.5E-08 | 2.1E-07  | 12.159 | 2.372 | 9.305  | 14.886 | 25.099  | 0.279 | 24.948  | 25.517  |
| ENSG00000229931 |           | -2.1 | 1.6E-05 | 0.0001   | 4.947  | 1.228 | 3.871  | 6.123  | 11.004  | 2.355 | 7.841   | 12.800  |
| ENSG00000267731 |           | -2.1 | 6.2E-04 | 0.00239  | 0.660  | 0.140 | 0.518  | 0.835  | 1.625   | 0.415 | 1.130   | 1.968   |
| ENSG00000248596 |           | -2.1 | 6.9E-04 | 0.0026   | 0.361  | 0.098 | 0.253  | 0.455  | 0.719   | 0.043 | 0.683   | 0.765   |
| ENSG00000165655 | ZNF503    | -2.2 | 7.9E-14 | 4.66E-12 | 30.763 | 2.663 | 27.710 | 33.759 | 66.814  | 0.551 | 66.174  | 67.521  |
| ENSG00000265972 | TXNIP     | -2.2 | 9.7E-16 | 1.03E-13 | 84.604 | 3.313 | 80.157 | 88.074 | 181.912 | 3.734 | 176.321 | 184.098 |
| ENSG00000092421 | SEMA6A    | -2.2 | 1.6E-11 | 4.62E-10 | 3.476  | 0.362 | 3.177  | 3.995  | 7.440   | 0.221 | 7.325   | 7.772   |
| ENSG00000253846 | PCDHGA10  | -2.2 | 2.4E-03 | 0.00743  | 0.227  | 0.065 | 0.137  | 0.275  | 0.606   | 0.188 | 0.426   | 0.769   |
| ENSG00000188729 | OSTN      | -2.2 | 1.1E-04 | 0.00053  | 0.821  | 0.353 | 0.296  | 1.053  | 1.733   | 0.294 | 1.415   | 1.982   |
| ENSG00000134986 | NREP      | -2.2 | 1.4E-14 | 1.01E-12 | 9.829  | 0.841 | 9.171  | 11.033 | 21.011  | 0.427 | 20.525  | 21.566  |
| ENSG00000015520 | NPC1L1    | -2.2 | 5.4E-06 | 4E-05    | 0.951  | 0.132 | 0.814  | 1.131  | 2.199   | 0.450 | 1.716   | 2.582   |
| ENSG00000138347 | MYPN      | -2.2 | 1.4E-06 | 1.2E-05  | 0.582  | 0.067 | 0.518  | 0.665  | 1.320   | 0.098 | 1.201   | 1.401   |
| ENSG00000144214 | LYG1      | -2.2 | 5.6E-04 | 0.00219  | 1.975  | 0.669 | 1.018  | 2.492  | 4.332   | 0.748 | 3.240   | 4.817   |
| ENSG00000181016 | LSMEM1    | -2.2 | 1.7E-06 | 1.4E-05  | 1.450  | 0.338 | 1.042  | 1.868  | 3.286   | 0.395 | 2.732   | 3.570   |
| ENSG00000148798 | INA       | -2.2 | 1.1E-03 | 0.0039   | 0.518  | 0.164 | 0.393  | 0.749  | 1.060   | 0.059 | 0.972   | 1.096   |
| ENSG00000164330 | EBF1      | -2.2 | 1.4E-05 | 8.8E-05  | 0.633  | 0.121 | 0.518  | 0.739  | 1.412   | 0.144 | 1.220   | 1.524   |
| ENSG00000158486 | DNAH3     | -2.2 | 4.6E-07 | 4.5E-06  | 0.431  | 0.108 | 0.308  | 0.542  | 1.008   | 0.038 | 0.968   | 1.061   |
| ENSG00000082196 | C1QTNF3   | -2.2 | 2.6E-05 | 0.00016  | 1.017  | 0.300 | 0.667  | 1.354  | 2.406   | 0.725 | 1.757   | 3.034   |
| ENSG00000213199 | ASIC3     | -2.2 | 1.2E-02 | 0.02846  | 0.506  | 0.335 | 0.173  | 0.965  | 1.159   | 0.208 | 0.987   | 1.406   |
| ENSG00000274460 |           | -2.2 | 8.5E-06 | 5.9E-05  | 2.242  | 0.423 | 1.941  | 2.866  | 4.698   | 0.417 | 4.387   | 5.268   |
| ENSG00000271474 |           | -2.2 | 4.6E-05 | 0.00025  | 0.537  | 0.111 | 0.412  | 0.682  | 1.257   | 0.111 | 1.132   | 1.402   |
| ENSG00000225792 |           | -2.2 | 5.3E-05 | 0.00029  | 2.326  | 0.604 | 1.887  | 3.175  | 4.854   | 0.450 | 4.522   | 5.475   |
| ENSG00000255389 |           | -2.2 | 1.1E-04 | 0.00054  | 0.958  | 0.119 | 0.788  | 1.063  | 2.106   | 0.316 | 1.752   | 2.372   |
| ENSG00000272468 |           | -2.2 | 2.5E-04 | 0.00109  | 4.155  | 1.575 | 2.426  | 5.999  | 8.655   | 2.060 | 7.342   | 11.677  |
| ENSG00000139865 | TTC6      | -2.3 | 3.2E-05 | 0.00019  | 0.328  | 0.139 | 0.200  | 0.525  | 0.777   | 0.105 | 0.620   | 0.847   |
| ENSG00000019549 | SNAI2     | -2.3 | 2.2E-07 | 2.3E-06  | 2.061  | 0.491 | 1.451  | 2.596  | 4.426   | 0.097 | 4.343   | 4.528   |
| ENSG00000115896 | PLCL1     | -2.3 | 5.9E-07 | 5.6E-06  | 0.656  | 0.129 | 0.510  | 0.817  | 1.442   | 0.277 | 1.117   | 1.672   |
| ENSG00000169116 | PARM1     | -2.3 | 4.2E-15 | 3.60E-13 | 13.322 | 0.214 | 13.196 | 13.642 | 30.164  | 1.155 | 29.411  | 31.847  |
| ENSG00000175745 | NR2F1     | -2.3 | 5.4E-13 | 2.46E-11 | 10.255 | 0.526 | 9.860  | 11.015 | 23.274  | 1.040 | 21.837  | 24.039  |
| ENSG00000078018 | MAP2      | -2.3 | 6.6E-11 | 1.7E-09  | 5.836  | 1.027 | 4.496  | 6.861  | 13.503  | 1.531 | 12.013  | 14.824  |
| ENSG00000203814 | HIST2H2BF | -2.3 | 9.2E-07 | 8.3E-06  | 1.792  | 0.487 | 1.160  | 2.236  | 4.127   | 0.244 | 3.794   | 4.309   |

|                 |            |      |         |          |        |       |        |        |        |       |        |        |
|-----------------|------------|------|---------|----------|--------|-------|--------|--------|--------|-------|--------|--------|
| ENSG00000184678 | HIST2H2BE  | -2.3 | 1.6E-09 | 2.9E-08  | 4.425  | 0.636 | 3.725  | 5.239  | 9.667  | 0.373 | 9.464  | 10.226 |
| ENSG00000196787 | HIST1H2AG  | -2.3 | 6.6E-10 | 1.3E-08  | 4.508  | 0.611 | 3.752  | 5.240  | 10.018 | 0.371 | 9.495  | 10.281 |
| ENSG00000174844 | DNAH12     | -2.3 | 1.6E-05 | 0.0001   | 0.167  | 0.029 | 0.137  | 0.206  | 0.360  | 0.044 | 0.337  | 0.426  |
| ENSG00000135407 | AVIL       | -2.3 | 9.7E-07 | 8.7E-06  | 0.711  | 0.043 | 0.672  | 0.751  | 1.745  | 0.364 | 1.394  | 2.059  |
| ENSG00000186517 | ARHGAP30   | -2.3 | 1.7E-08 | 2.4E-07  | 1.388  | 0.198 | 1.225  | 1.659  | 3.154  | 0.121 | 3.009  | 3.306  |
| ENSG00000270876 | ZNF30-AS1  | -2.4 | 2.0E-04 | 0.00092  | 2.566  | 0.994 | 1.706  | 3.874  | 6.876  | 0.617 | 6.439  | 7.791  |
| ENSG00000137573 | SULF1      | -2.4 | 3.8E-13 | 1.81E-11 | 4.265  | 0.591 | 3.397  | 4.701  | 10.015 | 0.154 | 9.788  | 10.111 |
| ENSG00000070731 | ST6GALNAC2 | -2.4 | 1.1E-08 | 1.6E-07  | 2.359  | 0.231 | 2.103  | 2.655  | 5.640  | 0.444 | 4.988  | 5.922  |
| ENSG00000178573 | MAF        | -2.4 | 1.4E-10 | 3.2E-09  | 1.392  | 0.129 | 1.201  | 1.479  | 3.162  | 0.052 | 3.092  | 3.202  |
| ENSG00000180573 | HIST1H2AC  | -2.4 | 2.8E-13 | 1.42E-11 | 14.676 | 1.628 | 12.386 | 16.069 | 34.083 | 0.698 | 33.100 | 34.750 |
| ENSG00000087589 | CASS4      | -2.4 | 2.3E-05 | 0.00014  | 0.520  | 0.140 | 0.320  | 0.631  | 1.202  | 0.152 | 1.070  | 1.334  |
| ENSG00000224294 |            | -2.4 | 5.4E-07 | 5.1E-06  | 1.839  | 0.563 | 1.213  | 2.581  | 4.772  | 0.536 | 4.190  | 5.227  |
| ENSG00000278238 |            | -2.4 | 9.3E-07 | 8.4E-06  | 6.005  | 0.973 | 5.162  | 7.408  | 13.647 | 0.936 | 12.715 | 14.947 |
| ENSG00000250519 |            | -2.4 | 1.7E-05 | 0.00011  | 2.562  | 0.757 | 1.465  | 3.077  | 6.125  | 0.780 | 5.121  | 7.024  |
| ENSG00000284526 |            | -2.4 | 6.0E-05 | 0.00032  | 0.365  | 0.142 | 0.268  | 0.573  | 0.916  | 0.057 | 0.861  | 0.996  |
| ENSG00000283235 |            | -2.4 | 2.4E-04 | 0.00107  | 0.858  | 0.258 | 0.500  | 1.089  | 2.102  | 0.156 | 1.870  | 2.214  |
| ENSG00000272486 |            | -2.4 | 3.3E-04 | 0.0014   | 1.278  | 0.392 | 0.724  | 1.646  | 3.165  | 0.441 | 2.530  | 3.549  |
| ENSG00000260727 | SLC7A5P1   | -2.5 | 1.0E-04 | 0.00052  | 3.117  | 1.344 | 1.832  | 4.963  | 7.775  | 1.808 | 5.096  | 9.068  |
| ENSG00000075223 | SEMA3C     | -2.5 | 5.1E-10 | 1E-08    | 10.806 | 2.131 | 7.784  | 12.700 | 26.051 | 1.381 | 24.473 | 27.209 |
| ENSG00000113389 | NPR3       | -2.5 | 1.0E-05 | 7E-05    | 0.317  | 0.123 | 0.224  | 0.494  | 0.733  | 0.223 | 0.604  | 1.067  |
| ENSG00000163121 | NEURL3     | -2.5 | 2.3E-04 | 0.00102  | 0.414  | 0.115 | 0.305  | 0.573  | 0.924  | 0.143 | 0.831  | 1.132  |
| ENSG00000182308 | DCAF4L1    | -2.5 | 1.6E-05 | 9.9E-05  | 0.590  | 0.078 | 0.511  | 0.698  | 1.535  | 0.043 | 1.484  | 1.571  |
| ENSG00000145087 | STXBP5L    | -2.6 | 5.0E-06 | 3.7E-05  | 0.284  | 0.087 | 0.158  | 0.357  | 0.690  | 0.142 | 0.604  | 0.900  |
| ENSG00000188738 | FSIP2      | -2.6 | 3.2E-03 | 0.00941  | 0.084  | 0.043 | 0.027  | 0.122  | 0.272  | 0.117 | 0.140  | 0.370  |
| ENSG00000164972 | C9orf24    | -2.6 | 2.7E-02 | 0.05675  | 0.212  | 0.007 | 0.205  | 0.221  | 0.692  | 0.061 | 0.655  | 0.783  |
| ENSG00000261087 |            | -2.6 | 3.1E-05 | 0.00018  | 0.752  | 0.245 | 0.506  | 1.078  | 2.057  | 0.194 | 1.766  | 2.169  |
| ENSG00000143469 | SYT14      | -2.7 | 1.2E-09 | 2.3E-08  | 0.366  | 0.058 | 0.285  | 0.413  | 0.978  | 0.115 | 0.857  | 1.077  |
| ENSG00000257335 | MGAM       | -2.7 | 1.2E-04 | 0.00059  | 0.085  | 0.019 | 0.059  | 0.099  | 0.207  | 0.036 | 0.164  | 0.237  |
| ENSG00000158406 | HIST1H4H   | -2.7 | 6.2E-11 | 1.6E-09  | 4.282  | 0.652 | 3.527  | 5.110  | 11.767 | 0.493 | 11.039 | 12.130 |
| ENSG00000158373 | HIST1H2BD  | -2.7 | 1.5E-12 | 5.85E-11 | 13.869 | 1.276 | 12.859 | 15.736 | 37.180 | 2.754 | 33.364 | 39.198 |
| ENSG00000132837 | DMGDH      | -2.7 | 7.9E-08 | 9.3E-07  | 0.499  | 0.065 | 0.432  | 0.589  | 1.288  | 0.061 | 1.245  | 1.375  |
| ENSG00000276966 | HIST1H4E   | -2.9 | 1.2E-07 | 1.4E-06  | 1.722  | 0.445 | 1.323  | 2.253  | 4.849  | 0.367 | 4.331  | 5.196  |
| ENSG00000274290 | HIST1H2BE  | -2.9 | 3.6E-06 | 2.8E-05  | 1.025  | 0.325 | 0.676  | 1.347  | 2.543  | 0.341 | 2.345  | 3.051  |
| ENSG00000188959 | C9orf152   | -2.9 | 5.4E-06 | 4E-05    | 0.415  | 0.069 | 0.350  | 0.485  | 1.054  | 0.092 | 0.974  | 1.147  |
| ENSG00000268756 |            | -2.9 | 2.3E-08 | 3.1E-07  | 5.942  | 1.161 | 4.843  | 7.581  | 17.527 | 2.380 | 16.067 | 21.045 |
| ENSG00000169432 | SCN9A      | -3   | 2.9E-12 | 1.07E-10 | 2.080  | 0.476 | 1.388  | 2.475  | 6.452  | 0.597 | 5.850  | 6.966  |
| ENSG00000237693 | IRGM       | -3   | 2.1E-05 | 0.00013  | 0.653  | 0.349 | 0.333  | 1.140  | 2.015  | 0.210 | 1.701  | 2.144  |
| ENSG00000159208 | CIART      | -3   | 3.2E-10 | 6.8E-09  | 2.050  | 0.240 | 1.740  | 2.316  | 5.806  | 0.827 | 5.148  | 6.866  |

|                 |           |      |         |          |        |       |        |        |         |        |        |         |
|-----------------|-----------|------|---------|----------|--------|-------|--------|--------|---------|--------|--------|---------|
| ENSG00000115461 | IGFBP5    | -3.1 | 5.4E-16 | 6.10E-14 | 6.063  | 0.501 | 5.568  | 6.726  | 18.532  | 0.628  | 18.065 | 19.458  |
| ENSG00000171587 | DSCAM     | -3.2 | 9.7E-03 | 0.02399  | 0.022  | 0.017 | 0.000  | 0.036  | 0.065   | 0.019  | 0.037  | 0.075   |
| ENSG00000187775 | DNAH17    | -3.3 | 1.2E-14 | 9.19E-13 | 1.243  | 0.091 | 1.118  | 1.314  | 4.031   | 0.242  | 3.823  | 4.267   |
| ENSG00000113369 | ARRDC3    | -3.3 | 2.6E-16 | 3.11E-14 | 8.222  | 1.229 | 6.828  | 9.815  | 26.063  | 0.710  | 25.022 | 26.514  |
| ENSG00000166793 | YPEL4     | -3.4 | 1.6E-09 | 2.9E-08  | 0.651  | 0.121 | 0.496  | 0.748  | 2.018   | 0.178  | 1.896  | 2.274   |
| ENSG00000188580 | NKAIN2    | -3.4 | 1.4E-06 | 1.2E-05  | 0.370  | 0.131 | 0.227  | 0.541  | 1.130   | 0.240  | 0.950  | 1.457   |
| ENSG00000273802 | HIST1H2BG | -3.4 | 7.0E-11 | 1.8E-09  | 2.428  | 0.267 | 2.176  | 2.786  | 8.276   | 0.556  | 7.660  | 9.011   |
| ENSG00000233030 |           | -3.4 | 1.3E-05 | 8.7E-05  | 0.279  | 0.053 | 0.217  | 0.344  | 0.998   | 0.184  | 0.810  | 1.156   |
| ENSG00000171951 | SCG2      | -3.5 | 5.9E-07 | 5.6E-06  | 0.710  | 0.445 | 0.325  | 1.344  | 2.402   | 0.142  | 2.250  | 2.523   |
| ENSG00000126368 | NR1D1     | -3.6 | 6.3E-14 | 3.85E-12 | 7.707  | 0.630 | 7.087  | 8.542  | 26.913  | 3.452  | 24.345 | 31.647  |
| ENSG00000139269 | INHBE     | -3.6 | 1.3E-06 | 1.1E-05  | 0.548  | 0.234 | 0.391  | 0.896  | 1.598   | 0.158  | 1.482  | 1.815   |
| ENSG00000183813 | CCR4      | -3.7 | 2.8E-06 | 2.2E-05  | 0.283  | 0.162 | 0.098  | 0.489  | 1.017   | 0.035  | 0.964  | 1.040   |
| ENSG00000234424 |           | -3.9 | 2.0E-08 | 2.7E-07  | 1.048  | 0.337 | 0.685  | 1.335  | 3.988   | 0.570  | 3.173  | 4.383   |
| ENSG00000015592 | STMN4     | -4.4 | 3.8E-08 | 4.8E-07  | 0.302  | 0.123 | 0.134  | 0.416  | 1.366   | 0.111  | 1.222  | 1.453   |
| ENSG00000132639 | SNAP25    | -4.9 | 1.8E-05 | 0.00012  | 0.647  | 0.221 | 0.318  | 0.790  | 3.131   | 0.323  | 2.851  | 3.416   |
| ENSG00000256779 |           | -5.3 | 3.1E-09 | 5.3E-08  | 0.903  | 0.396 | 0.429  | 1.370  | 4.667   | 0.605  | 3.902  | 5.382   |
| ENSG00000144188 | TRIM43CP  | -5.5 | 8.7E-13 | 3.76E-11 | 2.028  | 0.201 | 1.827  | 2.294  | 10.501  | 0.691  | 9.906  | 11.181  |
| ENSG00000144010 | TRIM43B   | -5.8 | 3.3E-14 | 2.21E-12 | 3.919  | 0.922 | 2.906  | 5.051  | 21.859  | 2.419  | 20.404 | 25.446  |
| ENSG00000204510 | PRAMEF7   | -5.8 | 1.7E-09 | 3.1E-08  | 0.563  | 0.064 | 0.488  | 0.642  | 2.864   | 0.628  | 2.355  | 3.643   |
| ENSG00000284546 |           | -5.8 | 8.2E-08 | 9.6E-07  | 1.097  | 0.569 | 0.668  | 1.932  | 6.185   | 1.287  | 5.214  | 7.930   |
| ENSG00000144015 | TRIM43    | -5.9 | 1.2E-14 | 9.13E-13 | 4.239  | 0.927 | 3.199  | 5.428  | 23.274  | 2.683  | 21.373 | 27.064  |
| ENSG00000284306 |           | -5.9 | 4.5E-09 | 7.3E-08  | 1.700  | 0.333 | 1.227  | 1.978  | 9.227   | 2.293  | 7.342  | 11.994  |
| ENSG00000250782 |           | -6.1 | 2.0E-14 | 1.34E-12 | 12.211 | 1.145 | 11.338 | 13.845 | 69.314  | 12.385 | 58.686 | 81.978  |
| ENSG00000182330 | PRAMEF8   | -6.2 | 1.0E-08 | 1.5E-07  | 0.472  | 0.116 | 0.342  | 0.590  | 2.533   | 0.800  | 2.100  | 3.730   |
| ENSG00000277862 | PRAMEF34P | -6.3 | 4.5E-13 | 2.09E-11 | 1.802  | 0.146 | 1.684  | 2.013  | 10.430  | 1.865  | 8.820  | 12.231  |
| ENSG00000283873 |           | -6.3 | 7.2E-11 | 1.8E-09  | 2.256  | 0.796 | 1.360  | 3.037  | 13.044  | 1.494  | 11.760 | 14.556  |
| ENSG00000284018 |           | -6.3 | 1.7E-08 | 2.4E-07  | 1.416  | 0.612 | 0.912  | 2.304  | 8.278   | 2.652  | 6.000  | 10.972  |
| ENSG00000229978 | PRAMEF36P | -6.4 | 6.1E-13 | 2.75E-11 | 1.728  | 0.140 | 1.573  | 1.897  | 10.308  | 1.690  | 8.845  | 11.846  |
| ENSG00000283776 |           | -6.6 | 5.7E-14 | 3.53E-12 | 8.881  | 1.240 | 7.668  | 10.573 | 55.437  | 9.323  | 48.525 | 68.250  |
| ENSG00000235268 | KDM4E     | -6.8 | 2.6E-12 | 9.61E-11 | 0.674  | 0.207 | 0.521  | 0.971  | 4.543   | 0.309  | 4.095  | 4.802   |
| ENSG00000250386 |           | -6.9 | 3.9E-10 | 8.1E-09  | 9.266  | 2.181 | 6.217  | 11.170 | 59.215  | 18.192 | 44.468 | 81.805  |
| ENSG00000283740 |           | -7.1 | 3.6E-15 | 3.19E-13 | 16.036 | 2.342 | 14.327 | 19.473 | 106.075 | 18.013 | 90.894 | 126.328 |
| ENSG00000236175 | SSU72P6   | -7.7 | 1.5E-10 | 3.5E-09  | 1.363  | 0.467 | 0.704  | 1.763  | 10.032  | 0.459  | 9.670  | 10.626  |
| ENSG00000189325 | C6orf222  | -7.7 | 4.8E-09 | 7.8E-08  | 0.163  | 0.031 | 0.122  | 0.197  | 1.310   | 0.138  | 1.196  | 1.472   |
| ENSG00000150244 | TRIM48    | -7.8 | 1.5E-11 | 4.5E-10  | 0.942  | 0.282 | 0.646  | 1.320  | 6.710   | 1.426  | 5.612  | 8.606   |
| ENSG00000284438 |           | -7.8 | 2.5E-11 | 6.9E-10  | 2.069  | 0.848 | 0.891  | 2.839  | 15.264  | 1.291  | 14.146 | 16.398  |
| ENSG00000204449 | TRIM49C   | -8.1 | 3.5E-16 | 4.1E-14  | 1.772  | 0.256 | 1.469  | 2.082  | 13.557  | 1.737  | 12.121 | 15.625  |
| ENSG00000168930 | TRIM49    | -8.4 | 1.4E-15 | 1.4E-13  | 2.825  | 0.488 | 2.180  | 3.204  | 22.602  | 3.013  | 20.010 | 25.625  |



|                 |          |       |         |         |        |       |        |        |         |        |         |         |
|-----------------|----------|-------|---------|---------|--------|-------|--------|--------|---------|--------|---------|---------|
| ENSG00000157765 | SLC34A2  | -8.4  | 6.3E-12 | 2.1E-10 | 0.334  | 0.097 | 0.188  | 0.389  | 2.582   | 0.551  | 2.139   | 3.276   |
| ENSG00000249620 |          | -8.7  | 5.7E-11 | 1.4E-09 | 3.836  | 0.835 | 2.740  | 4.501  | 33.501  | 8.153  | 27.310  | 44.493  |
| ENSG00000233802 | TRIM49D2 | -8.9  | 1.6E-15 | 1.5E-13 | 1.779  | 0.152 | 1.620  | 1.944  | 14.759  | 2.347  | 12.844  | 17.639  |
| ENSG00000223417 | TRIM49D1 | -8.9  | 1.8E-15 | 1.7E-13 | 1.356  | 0.106 | 1.253  | 1.483  | 11.203  | 1.769  | 9.744   | 13.326  |
| ENSG00000237706 | TRIM51EP | -9    | 9.6E-13 | 4.1E-11 | 1.282  | 0.309 | 0.998  | 1.718  | 10.516  | 2.211  | 8.919   | 13.608  |
| ENSG00000251258 | RFPL4B   | -9.4  | 2.5E-09 | 4.4E-08 | 0.456  | 0.233 | 0.251  | 0.776  | 4.084   | 0.765  | 3.443   | 4.960   |
| ENSG00000204455 | TRIM51BP | -9.5  | 4.3E-13 | 2.0E-11 | 1.391  | 0.404 | 1.114  | 1.988  | 12.098  | 2.392  | 10.301  | 15.353  |
| ENSG00000269466 |          | -9.6  | 3.4E-13 | 1.6E-11 | 23.282 | 5.069 | 19.932 | 30.732 | 218.205 | 24.844 | 197.802 | 248.265 |
| ENSG00000249156 |          | -9.7  | 2.1E-12 | 8.1E-11 | 6.055  | 2.023 | 3.929  | 8.804  | 56.141  | 10.221 | 47.843  | 68.797  |
| ENSG00000257951 |          | -10.1 | 1.4E-12 | 5.6E-11 | 1.894  | 0.500 | 1.200  | 2.363  | 18.124  | 4.011  | 15.793  | 24.130  |
| ENSG00000189253 | TRIM64B  | -10.3 | 2.0E-12 | 7.7E-11 | 0.459  | 0.194 | 0.267  | 0.722  | 4.465   | 0.582  | 4.020   | 5.243   |
| ENSG00000225581 | TRIM53AP | -10.4 | 2.8E-12 | 1.0E-10 | 0.932  | 0.203 | 0.643  | 1.119  | 8.813   | 2.795  | 6.613   | 12.440  |
| ENSG00000180532 | ZSCAN4   | -10.6 | 3.4E-13 | 1.7E-11 | 1.511  | 0.633 | 0.565  | 1.900  | 14.940  | 2.600  | 12.698  | 17.463  |
| ENSG00000116726 | PRAMEF12 | -11.1 | 1.3E-11 | 4.1E-10 | 0.387  | 0.171 | 0.165  | 0.534  | 3.898   | 0.647  | 3.394   | 4.749   |
| ENSG00000166013 | TRIM53BP | -11.3 | 1.2E-12 | 5.1E-11 | 0.633  | 0.169 | 0.439  | 0.851  | 6.755   | 1.583  | 5.589   | 8.940   |
| ENSG00000204450 | TRIM64   | -11.6 | 7.0E-09 | 1.1E-07 | 0.148  | 0.094 | 0.079  | 0.283  | 1.670   | 0.563  | 1.201   | 2.325   |
| ENSG00000254764 | TRIM53CP | -11.8 | 3.8E-11 | 1.0E-09 | 0.547  | 0.196 | 0.375  | 0.822  | 6.115   | 1.497  | 4.438   | 8.083   |
| ENSG00000182053 | TRIM49B  | -12.1 | 2.4E-12 | 8.9E-11 | 0.519  | 0.146 | 0.392  | 0.676  | 5.631   | 1.486  | 4.577   | 7.729   |
| ENSG00000268799 |          | -12.9 | 9.3E-12 | 3.0E-10 | 3.824  | 1.207 | 2.035  | 4.654  | 48.173  | 13.156 | 36.991  | 62.445  |
| ENSG00000106278 | PTPRZ1   | -13.9 | 7.0E-02 | 1.2E-01 | 0.008  | 0.009 | 0.000  | 0.015  | 0.126   | 0.252  | 0.000   | 0.503   |
| ENSG00000236941 |          | -18.4 | 2.9E-11 | 8.1E-10 | 0.307  | 0.167 | 0.117  | 0.448  | 5.833   | 1.162  | 5.162   | 7.565   |
| ENSG00000255855 | KDM4F    | -19.2 | 2.6E-12 | 9.5E-11 | 0.248  | 0.120 | 0.079  | 0.346  | 4.648   | 0.841  | 4.078   | 5.859   |

| Gene            |            | Linear | P Value | FDR      | Transcripts per million (TPM) |          |         |         |         |         |         |         |
|-----------------|------------|--------|---------|----------|-------------------------------|----------|---------|---------|---------|---------|---------|---------|
|                 |            |        |         |          | TestMea                       | TestStdD | TestMin | TestMax | RefMea  | RefStdD | RefMin  | RefMax  |
| ENSG00000259456 | ADNP-AS1   | -1.5   | 5.1E-02 | 0.09682  | 2.572                         | 0.598    | 2.016   | 3.419   | 3.144   | 1.132   | 1.525   | 4.167   |
| ENSG00000279355 | AGPAT4-IT1 | -1.5   | 3.3E-02 | 0.06816  | 1.834                         | 0.583    | 1.371   | 2.653   | 2.735   | 0.079   | 2.657   | 2.803   |
| ENSG00000189060 | H1FO       | -1.5   | 5.2E-11 | 1.5E-09  | 301.195                       | 11.230   | 286.121 | 310.652 | 432.005 | 12.983  | 420.765 | 443.633 |
| ENSG00000176788 | BASP1      | -1.5   | 3.7E-10 | 8.3E-09  | 190.272                       | 6.726    | 182.452 | 197.936 | 269.107 | 11.216  | 259.495 | 280.689 |
| ENSG00000277443 | MARCKS     | -1.5   | 8.0E-11 | 2.2E-09  | 147.635                       | 2.665    | 145.160 | 151.376 | 203.288 | 11.154  | 192.025 | 212.875 |
| ENSG00000143032 | BARHL2     | -1.5   | 1.7E-02 | 0.0396   | 1.371                         | 0.367    | 1.023   | 1.802   | 1.811   | 0.230   | 1.612   | 2.033   |
| ENSG00000187837 | HIST1H1C   | -1.5   | 4.5E-08 | 5.8E-07  | 129.057                       | 8.112    | 118.174 | 135.751 | 174.671 | 7.779   | 168.983 | 185.463 |
| ENSG00000151725 | CENPU      | -1.5   | 4.0E-09 | 6.6E-08  | 101.855                       | 5.016    | 98.944  | 109.339 | 146.155 | 13.334  | 134.582 | 157.703 |
| ENSG00000148677 | ANKRD1     | -1.5   | 2.2E-04 | 0.00096  | 94.766                        | 10.203   | 81.344  | 106.157 | 123.701 | 3.845   | 118.029 | 126.084 |
| ENSG00000149201 | CCDC81     | -1.5   | 2.3E-02 | 0.04955  | 0.591                         | 0.169    | 0.349   | 0.742   | 0.824   | 0.103   | 0.726   | 0.913   |
| ENSG00000087074 | PPP1R15A   | -1.5   | 6.0E-08 | 7.4E-07  | 76.433                        | 3.289    | 72.448  | 80.119  | 104.133 | 3.119   | 101.511 | 107.674 |
| ENSG00000251562 | MALAT1     | -1.5   | 1.8E-05 | 0.00011  | 74.589                        | 8.074    | 64.211  | 83.489  | 107.023 | 16.914  | 85.852  | 120.671 |
| ENSG00000115738 | ID2        | -1.5   | 2.0E-10 | 4.8E-09  | 72.631                        | 3.510    | 69.105  | 77.452  | 101.783 | 1.435   | 99.644  | 102.726 |
| ENSG00000135269 | TES        | -1.5   | 3.0E-10 | 6.9E-09  | 44.751                        | 2.985    | 40.819  | 48.064  | 62.171  | 1.028   | 61.281  | 63.089  |
| ENSG00000174371 | EXO1       | -1.5   | 1.3E-08 | 1.8E-07  | 39.731                        | 1.850    | 37.185  | 41.579  | 53.792  | 2.961   | 50.349  | 56.263  |
| ENSG00000270882 | HIST2H4A   | -1.5   | 1.1E-08 | 1.6E-07  | 37.608                        | 1.981    | 35.205  | 39.517  | 53.350  | 0.763   | 52.389  | 54.255  |
| ENSG00000112742 | TTK        | -1.5   | 2.1E-04 | 0.00092  | 37.307                        | 0.855    | 36.230  | 38.199  | 51.404  | 3.717   | 47.032  | 54.492  |
| ENSG00000141665 | FBXO15     | -1.5   | 1.3E-02 | 0.03222  | 0.485                         | 0.106    | 0.415   | 0.643   | 0.649   | 0.024   | 0.623   | 0.669   |
| ENSG00000170558 | CDH2       | -1.5   | 5.5E-12 | 2.11E-10 | 36.633                        | 0.937    | 35.357  | 37.457  | 52.665  | 1.078   | 51.726  | 53.599  |
| ENSG00000149948 | HMGA2      | -1.5   | 1.2E-09 | 2.3E-08  | 36.373                        | 1.746    | 34.639  | 37.925  | 49.437  | 1.989   | 47.564  | 51.157  |
| ENSG00000270276 | HIST2H4B   | -1.5   | 1.2E-08 | 1.7E-07  | 36.309                        | 2.019    | 34.075  | 38.351  | 51.871  | 0.882   | 50.596  | 52.626  |
| ENSG00000105974 | CAV1       | -1.5   | 1.3E-09 | 2.5E-08  | 35.354                        | 2.494    | 32.821  | 37.996  | 51.000  | 2.803   | 48.564  | 53.427  |
| ENSG00000174738 | NR1D2      | -1.5   | 5.9E-07 | 5.5E-06  | 33.458                        | 1.266    | 32.287  | 35.057  | 48.209  | 2.575   | 45.026  | 50.302  |
| ENSG00000170017 | ALCAM      | -1.5   | 2.3E-08 | 3.2E-07  | 33.194                        | 0.899    | 32.221  | 34.049  | 46.056  | 2.621   | 42.799  | 48.180  |
| ENSG00000168564 | CDKN2AIP   | -1.5   | 9.8E-09 | 1.5E-07  | 31.861                        | 0.349    | 31.516  | 32.237  | 43.937  | 1.507   | 42.308  | 45.219  |
| ENSG00000174579 | MSL2       | -1.5   | 5.2E-08 | 6.5E-07  | 30.487                        | 1.510    | 28.981  | 32.270  | 40.833  | 0.999   | 39.712  | 42.145  |
| ENSG00000248873 | SERBP1P6   | -1.5   | 1.8E-07 | 2E-06    | 29.704                        | 2.786    | 27.708  | 33.830  | 40.640  | 2.064   | 37.782  | 42.716  |
| ENSG00000138814 | PPP3CA     | -1.5   | 1.9E-09 | 3.5E-08  | 29.164                        | 1.757    | 27.393  | 31.585  | 40.292  | 0.377   | 40.000  | 40.789  |
| ENSG00000236539 | HNRNPA1P54 | -1.5   | 2.1E-02 | 0.04726  | 0.258                         | 0.051    | 0.205   | 0.322   | 0.340   | 0.021   | 0.326   | 0.371   |
| ENSG00000171476 | HOPX       | -1.5   | 1.3E-02 | 0.03221  | 0.380                         | 0.057    | 0.325   | 0.460   | 0.581   | 0.148   | 0.405   | 0.768   |
| ENSG00000218336 | TENM3      | -1.5   | 2.7E-08 | 3.6E-07  | 27.000                        | 2.096    | 24.277  | 29.386  | 37.294  | 1.636   | 35.059  | 38.517  |
| ENSG00000143333 | RGS16      | -1.5   | 1.3E-06 | 1.1E-05  | 25.603                        | 1.262    | 24.318  | 27.342  | 34.887  | 4.315   | 31.159  | 38.963  |
| ENSG00000279208 |            | -1.5   | 3.6E-05 | 0.0002   | 24.877                        | 3.904    | 21.294  | 29.642  | 34.773  | 2.452   | 31.521  | 36.667  |
| ENSG00000272767 | JMJD1C-AS1 | -1.5   | 1.8E-02 | 0.04034  | 2.733                         | 0.784    | 2.226   | 3.901   | 3.756   | 0.361   | 3.255   | 4.118   |
| ENSG00000205189 | ZBTB10     | -1.5   | 4.5E-06 | 3.2E-05  | 24.498                        | 1.700    | 22.011  | 25.746  | 36.033  | 2.289   | 33.560  | 37.980  |
| ENSG00000196781 | TLE1       | -1.5   | 1.6E-09 | 3E-08    | 23.701                        | 0.978    | 22.885  | 25.101  | 33.812  | 0.803   | 33.262  | 34.964  |

|                 |            |      |         |         |        |       |        |        |        |       |        |        |
|-----------------|------------|------|---------|---------|--------|-------|--------|--------|--------|-------|--------|--------|
| ENSG00000128052 | KDR        | -1.5 | 3.0E-02 | 0.06305 | 0.504  | 0.106 | 0.367  | 0.597  | 0.713  | 0.149 | 0.586  | 0.874  |
| ENSG00000137831 | UACA       | -1.5 | 8.2E-03 | 0.02129 | 23.306 | 1.671 | 21.026 | 25.049 | 32.677 | 3.630 | 28.309 | 35.665 |
| ENSG00000116044 | NFE2L2     | -1.5 | 3.4E-09 | 5.8E-08 | 22.951 | 0.853 | 21.930 | 23.881 | 33.367 | 2.461 | 30.371 | 35.382 |
| ENSG00000248971 | KRT8P46    | -1.5 | 5.2E-02 | 0.09851 | 1.605  | 0.707 | 0.859  | 2.327  | 2.250  | 0.447 | 1.625  | 2.573  |
| ENSG00000233930 | KRTAP5-AS1 | -1.5 | 1.2E-02 | 0.02966 | 0.972  | 0.141 | 0.811  | 1.127  | 1.564  | 0.229 | 1.233  | 1.757  |
| ENSG00000123094 | RASSF8     | -1.5 | 3.3E-04 | 0.00138 | 21.268 | 1.923 | 18.740 | 23.165 | 29.179 | 2.275 | 26.617 | 31.095 |
| ENSG00000233639 | LINC01158  | -1.5 | 4.0E-02 | 0.08029 | 3.255  | 1.179 | 1.661  | 4.285  | 4.339  | 0.235 | 4.159  | 4.653  |
| ENSG00000214900 | LINC01588  | -1.5 | 9.4E-02 | 0.159   | 0.118  | 0.032 | 0.075  | 0.148  | 0.183  | 0.035 | 0.153  | 0.234  |
| ENSG00000138050 | THUMP2     | -1.5 | 1.3E-08 | 1.9E-07 | 20.929 | 0.867 | 20.448 | 22.229 | 28.414 | 0.922 | 27.611 | 29.212 |
| ENSG00000124635 | HIST1H2BJ  | -1.5 | 6.8E-06 | 4.7E-05 | 20.487 | 1.222 | 19.343 | 21.785 | 28.627 | 0.595 | 28.129 | 29.312 |
| ENSG00000133639 | BTG1       | -1.5 | 1.3E-09 | 2.5E-08 | 19.839 | 0.988 | 18.498 | 20.650 | 28.357 | 1.059 | 27.086 | 29.679 |
| ENSG00000165072 | MAMDC2     | -1.5 | 2.6E-02 | 0.05502 | 0.677  | 0.106 | 0.612  | 0.835  | 1.106  | 0.067 | 1.019  | 1.159  |
| ENSG00000177565 | TBL1XR1    | -1.5 | 1.9E-04 | 0.00085 | 19.257 | 1.751 | 17.225 | 21.502 | 28.339 | 2.119 | 26.191 | 30.160 |
| ENSG00000165480 | SKA3       | -1.5 | 1.1E-07 | 1.2E-06 | 19.199 | 2.403 | 16.354 | 21.902 | 26.910 | 0.561 | 26.246 | 27.375 |
| ENSG00000172059 | KLF11      | -1.5 | 2.4E-09 | 4.2E-08 | 18.867 | 0.806 | 17.819 | 19.784 | 27.086 | 1.440 | 26.213 | 29.218 |
| ENSG00000168556 | ING2       | -1.5 | 3.4E-07 | 3.4E-06 | 17.955 | 1.903 | 15.659 | 20.003 | 26.493 | 1.855 | 23.930 | 27.858 |
| ENSG00000066468 | FGFR2      | -1.5 | 6.4E-10 | 1.3E-08 | 17.434 | 0.841 | 16.538 | 18.555 | 25.193 | 1.064 | 23.896 | 26.064 |
| ENSG00000197050 | ZNF420     | -1.5 | 4.4E-06 | 3.2E-05 | 16.789 | 1.237 | 15.686 | 17.941 | 23.335 | 2.195 | 20.850 | 25.182 |
| ENSG00000166866 | MYO1A      | -1.5 | 1.5E-02 | 0.03433 | 0.634  | 0.100 | 0.531  | 0.759  | 0.978  | 0.162 | 0.798  | 1.114  |
| ENSG00000139946 | PELI2      | -1.5 | 1.4E-06 | 1.2E-05 | 16.587 | 1.473 | 14.753 | 18.331 | 23.347 | 1.403 | 21.896 | 24.548 |
| ENSG00000077684 | JADE1      | -1.5 | 6.5E-10 | 1.3E-08 | 15.585 | 0.673 | 14.848 | 16.469 | 22.190 | 1.291 | 20.850 | 23.296 |
| ENSG00000259485 | LINC02253  | -1.5 | 2.2E-05 | 0.00013 | 15.362 | 1.447 | 13.674 | 16.612 | 20.195 | 1.141 | 19.519 | 21.890 |
| ENSG00000134986 | NREP       | -1.5 | 3.3E-09 | 5.6E-08 | 15.292 | 0.688 | 14.652 | 16.084 | 21.011 | 0.427 | 20.525 | 21.566 |
| ENSG00000165555 | NOXRED1    | -1.5 | 2.8E-02 | 0.05979 | 1.139  | 0.331 | 0.676  | 1.431  | 1.375  | 0.309 | 1.152  | 1.809  |
| ENSG00000123572 | NRK        | -1.5 | 4.0E-02 | 0.07911 | 0.293  | 0.078 | 0.181  | 0.358  | 0.392  | 0.122 | 0.213  | 0.488  |
| ENSG00000118922 | KLF12      | -1.5 | 1.3E-04 | 0.00061 | 14.467 | 1.719 | 11.906 | 15.551 | 19.967 | 1.166 | 18.853 | 20.974 |
| ENSG00000253846 | PCDHGA10   | -1.5 | 7.8E-02 | 0.13716 | 0.345  | 0.086 | 0.268  | 0.438  | 0.606  | 0.188 | 0.426  | 0.769  |
| ENSG00000023608 | SNAPC1     | -1.5 | 4.1E-06 | 3E-05   | 13.148 | 0.956 | 12.430 | 14.532 | 17.671 | 1.448 | 15.850 | 19.393 |
| ENSG00000121361 | KCNJ8      | -1.5 | 7.1E-07 | 6.5E-06 | 12.742 | 0.744 | 12.121 | 13.674 | 17.659 | 0.769 | 16.654 | 18.528 |
| ENSG00000106571 | GLI3       | -1.5 | 7.8E-08 | 9.3E-07 | 12.558 | 1.197 | 11.046 | 13.786 | 17.970 | 0.810 | 16.900 | 18.598 |
| ENSG00000164776 | PHKG1      | -1.5 | 3.0E-02 | 0.06198 | 1.333  | 0.416 | 0.789  | 1.793  | 2.076  | 0.066 | 2.022  | 2.156  |
| ENSG00000102032 | REBP       | -1.5 | 4.3E-07 | 4.2E-06 | 12.116 | 1.066 | 10.797 | 13.400 | 17.251 | 1.066 | 16.520 | 18.780 |
| ENSG00000100142 | POLR2F     | -1.5 | 3.2E-02 | 0.06671 | 0.456  | 0.109 | 0.305  | 0.563  | 0.617  | 0.092 | 0.566  | 0.754  |
| ENSG00000228169 | PPIAP19    | -1.5 | 3.4E-02 | 0.06887 | 4.704  | 1.549 | 2.586  | 6.178  | 6.219  | 1.060 | 4.735  | 7.253  |
| ENSG00000198732 | SMOC1      | -1.5 | 3.9E-06 | 2.9E-05 | 10.744 | 1.108 | 9.934  | 12.305 | 14.749 | 1.891 | 13.146 | 16.826 |
| ENSG00000229083 | PSMA6P2    | -1.5 | 1.1E-02 | 0.02652 | 5.708  | 0.671 | 5.043  | 6.353  | 7.372  | 0.901 | 6.628  | 8.447  |
| ENSG00000050628 | PTGER3     | -1.5 | 7.2E-02 | 0.12916 | 0.284  | 0.055 | 0.244  | 0.365  | 0.388  | 0.030 | 0.358  | 0.413  |
| ENSG00000239269 | RPSAP4     | -1.5 | 1.1E-04 | 0.00054 | 10.464 | 1.006 | 9.282  | 11.412 | 14.375 | 1.465 | 12.213 | 15.282 |

|                 |           |      |         |         |        |       |        |        |        |       |        |        |
|-----------------|-----------|------|---------|---------|--------|-------|--------|--------|--------|-------|--------|--------|
| ENSG00000233045 |           | -1.5 | 9.5E-04 | 0.00346 | 9.876  | 1.897 | 7.099  | 11.336 | 14.144 | 0.867 | 13.482 | 15.308 |
| ENSG00000146707 | POMZP3    | -1.5 | 1.7E-05 | 0.00011 | 9.669  | 0.472 | 9.098  | 10.059 | 13.325 | 0.741 | 12.816 | 14.386 |
| ENSG00000134438 | RAX       | -1.5 | 1.3E-02 | 0.03193 | 1.232  | 0.225 | 0.971  | 1.521  | 1.751  | 0.433 | 1.413  | 2.319  |
| ENSG00000249465 | RBMXP4    | -1.5 | 1.3E-02 | 0.03109 | 2.830  | 0.567 | 2.009  | 3.286  | 4.228  | 0.749 | 3.106  | 4.631  |
| ENSG00000168621 | GDNF      | -1.5 | 9.4E-08 | 1.1E-06 | 9.200  | 0.778 | 8.096  | 9.822  | 13.102 | 0.742 | 12.356 | 13.740 |
| ENSG00000064042 | LIMCH1    | -1.5 | 2.3E-09 | 4E-08   | 9.189  | 0.297 | 8.903  | 9.534  | 13.309 | 0.387 | 12.784 | 13.601 |
| ENSG00000196159 | FAT4      | -1.5 | 5.3E-05 | 0.00028 | 9.015  | 1.050 | 7.519  | 9.869  | 13.033 | 0.653 | 12.083 | 13.461 |
| ENSG00000259802 |           | -1.5 | 9.3E-04 | 0.0034  | 8.893  | 1.103 | 7.475  | 10.030 | 12.344 | 1.959 | 10.286 | 15.007 |
| ENSG00000168772 | CXXC4     | -1.5 | 7.1E-05 | 0.00036 | 8.805  | 0.591 | 7.972  | 9.361  | 13.051 | 1.140 | 12.040 | 14.038 |
| ENSG00000147852 | VLDLR     | -1.5 | 3.1E-09 | 5.3E-08 | 8.543  | 0.592 | 7.695  | 9.004  | 12.311 | 0.236 | 12.186 | 12.665 |
| ENSG00000165617 | DACT1     | -1.5 | 2.0E-07 | 2.1E-06 | 8.121  | 0.683 | 7.283  | 8.956  | 11.473 | 0.434 | 10.827 | 11.726 |
| ENSG00000224892 | RPS4XP16  | -1.5 | 1.7E-02 | 0.03842 | 3.586  | 1.016 | 2.129  | 4.470  | 5.010  | 0.489 | 4.641  | 5.672  |
| ENSG00000237440 | ZNF737    | -1.5 | 1.1E-05 | 7E-05   | 7.875  | 0.689 | 7.117  | 8.788  | 10.754 | 0.692 | 9.780  | 11.416 |
| ENSG00000272341 |           | -1.5 | 5.2E-05 | 0.00028 | 7.868  | 1.565 | 6.691  | 10.139 | 10.998 | 0.893 | 10.021 | 11.755 |
| ENSG00000147862 | NFIB      | -1.5 | 1.2E-06 | 1E-05   | 7.548  | 0.495 | 7.071  | 8.240  | 11.049 | 0.829 | 9.943  | 11.686 |
| ENSG00000185483 | ROR1      | -1.5 | 6.9E-08 | 8.4E-07 | 7.411  | 0.612 | 6.791  | 8.212  | 10.323 | 0.332 | 9.924  | 10.596 |
| ENSG00000203943 | SAMD13    | -1.5 | 4.5E-02 | 0.08835 | 0.895  | 0.108 | 0.745  | 1.001  | 1.462  | 0.367 | 0.932  | 1.709  |
| ENSG00000196081 | ZNF724    | -1.5 | 4.3E-06 | 3.2E-05 | 7.232  | 0.339 | 6.927  | 7.607  | 11.021 | 1.979 | 8.750  | 12.679 |
| ENSG00000220804 | LINC01881 | -1.5 | 3.1E-05 | 0.00018 | 7.123  | 0.457 | 6.607  | 7.631  | 9.605  | 0.911 | 8.238  | 10.076 |
| ENSG00000188404 | SELL      | -1.5 | 2.1E-02 | 0.04584 | 0.818  | 0.228 | 0.635  | 1.124  | 1.082  | 0.068 | 0.980  | 1.122  |
| ENSG00000226102 | SEPT7P3   | -1.5 | 3.2E-02 | 0.06656 | 3.989  | 0.865 | 2.807  | 4.866  | 4.894  | 1.145 | 3.949  | 6.265  |
| ENSG00000240914 |           | -1.5 | 5.9E-03 | 0.01617 | 6.836  | 1.359 | 5.047  | 8.353  | 9.562  | 0.507 | 9.230  | 10.301 |
| ENSG00000163535 | SGO2      | -1.5 | 3.9E-02 | 0.07799 | 16.502 | 2.992 | 13.757 | 20.449 | 22.989 | 3.310 | 19.042 | 25.724 |
| ENSG00000180376 | CCDC66    | -1.5 | 7.1E-05 | 0.00037 | 6.632  | 0.307 | 6.453  | 7.091  | 9.767  | 1.372 | 8.187  | 10.915 |
| ENSG00000139174 | PRICKLE1  | -1.5 | 6.1E-09 | 9.7E-08 | 6.628  | 0.394 | 6.063  | 6.966  | 9.224  | 0.372 | 8.666  | 9.427  |
| ENSG00000164463 | CREBRF    | -1.5 | 1.6E-04 | 0.00072 | 6.569  | 0.534 | 5.903  | 7.212  | 9.072  | 0.432 | 8.575  | 9.629  |
| ENSG00000085276 | MECOM     | -1.5 | 6.7E-05 | 0.00035 | 6.473  | 0.628 | 5.752  | 7.151  | 8.782  | 0.419 | 8.240  | 9.114  |
| ENSG00000261116 |           | -1.5 | 4.8E-04 | 0.00192 | 6.373  | 0.902 | 5.288  | 7.448  | 8.676  | 0.463 | 8.045  | 9.160  |
| ENSG00000004799 | PKD4      | -1.5 | 2.5E-06 | 1.9E-05 | 6.369  | 0.657 | 5.672  | 7.050  | 9.179  | 0.615 | 8.299  | 9.603  |
| ENSG00000147606 | SLC26A7   | -1.5 | 3.3E-02 | 0.0685  | 0.487  | 0.124 | 0.411  | 0.670  | 0.776  | 0.257 | 0.401  | 0.941  |
| ENSG00000158014 | SLC30A2   | -1.5 | 5.9E-02 | 0.10971 | 0.773  | 0.236 | 0.450  | 0.963  | 0.933  | 0.292 | 0.684  | 1.242  |
| ENSG00000011201 | ANOS1     | -1.5 | 2.2E-06 | 1.8E-05 | 5.969  | 0.390 | 5.514  | 6.459  | 8.544  | 0.265 | 8.171  | 8.800  |
| ENSG00000235245 |           | -1.5 | 4.9E-03 | 0.01378 | 5.966  | 1.250 | 4.747  | 7.712  | 9.165  | 0.928 | 7.779  | 9.685  |
| ENSG00000084453 | SLCO1A2   | -1.5 | 2.1E-02 | 0.0469  | 0.364  | 0.137 | 0.257  | 0.545  | 0.516  | 0.099 | 0.391  | 0.634  |
| ENSG00000178878 | APOLD1    | -1.5 | 2.6E-06 | 2E-05   | 5.662  | 0.387 | 5.211  | 6.099  | 8.100  | 0.426 | 7.807  | 8.734  |
| ENSG00000276644 | DACH1     | -1.5 | 7.1E-06 | 4.9E-05 | 5.579  | 0.603 | 4.844  | 6.175  | 8.239  | 0.814 | 7.437  | 8.941  |
| ENSG00000176971 | FIBIN     | -1.5 | 2.8E-04 | 0.00119 | 5.556  | 0.398 | 5.058  | 6.026  | 7.189  | 0.889 | 6.421  | 8.024  |
| ENSG00000049246 | PER3      | -1.5 | 2.1E-07 | 2.2E-06 | 5.497  | 0.440 | 4.912  | 5.976  | 8.123  | 0.659 | 7.135  | 8.470  |

|                 |           |      |         |         |       |       |       |       |       |       |       |       |
|-----------------|-----------|------|---------|---------|-------|-------|-------|-------|-------|-------|-------|-------|
| ENSG00000077522 | ACTN2     | -1.5 | 2.6E-06 | 2.1E-05 | 5.478 | 0.313 | 5.051 | 5.772 | 7.996 | 0.938 | 6.666 | 8.655 |
| ENSG00000204682 | CASC10    | -1.5 | 8.5E-05 | 0.00043 | 5.285 | 1.033 | 4.326 | 6.447 | 6.922 | 0.629 | 6.422 | 7.728 |
| ENSG00000112182 | BACH2     | -1.5 | 4.7E-08 | 6E-07   | 5.280 | 0.415 | 4.805 | 5.791 | 7.738 | 0.481 | 7.089 | 8.103 |
| ENSG00000113916 | BCL6      | -1.5 | 3.4E-07 | 3.4E-06 | 5.096 | 0.470 | 4.502 | 5.560 | 6.859 | 0.213 | 6.560 | 7.012 |
| ENSG00000226763 | SRRM5     | -1.5 | 2.4E-02 | 0.05299 | 0.907 | 0.316 | 0.514 | 1.212 | 1.388 | 0.070 | 1.339 | 1.492 |
| ENSG00000196782 | MAML3     | -1.5 | 2.1E-06 | 1.7E-05 | 5.016 | 0.424 | 4.508 | 5.419 | 6.707 | 0.074 | 6.666 | 6.818 |
| ENSG00000119866 | BCL11A    | -1.5 | 4.9E-07 | 4.7E-06 | 4.960 | 0.534 | 4.187 | 5.345 | 7.305 | 0.444 | 6.677 | 7.620 |
| ENSG00000263080 |           | -1.5 | 2.8E-03 | 0.00852 | 4.890 | 1.154 | 3.570 | 6.348 | 7.834 | 1.692 | 6.095 | 9.285 |
| ENSG00000198075 | SULT1C4   | -1.5 | 1.2E-02 | 0.02892 | 1.366 | 0.447 | 0.922 | 1.982 | 1.838 | 0.394 | 1.444 | 2.385 |
| ENSG00000229124 | VIM-AS1   | -1.5 | 1.3E-03 | 0.00457 | 4.625 | 1.084 | 3.381 | 5.785 | 6.290 | 0.884 | 5.172 | 7.334 |
| ENSG00000061455 | PRDM6     | -1.5 | 1.4E-06 | 1.1E-05 | 4.584 | 0.534 | 3.784 | 4.873 | 6.515 | 0.461 | 5.957 | 6.893 |
| ENSG00000148541 | FAM13C    | -1.5 | 1.5E-06 | 1.3E-05 | 4.525 | 0.221 | 4.308 | 4.781 | 6.115 | 0.105 | 6.048 | 6.269 |
| ENSG00000180596 | HIST1H2BC | -1.5 | 6.3E-03 | 0.01706 | 4.407 | 0.452 | 3.800 | 4.855 | 6.057 | 0.999 | 4.632 | 6.969 |
| ENSG00000242952 | RPSAP3    | -1.5 | 4.9E-03 | 0.01367 | 4.245 | 0.649 | 3.438 | 4.792 | 5.964 | 0.711 | 5.019 | 6.513 |
| ENSG00000234911 | TEX21P    | -1.5 | 2.1E-02 | 0.04705 | 2.261 | 0.466 | 1.688 | 2.663 | 3.397 | 1.031 | 2.072 | 4.215 |
| ENSG00000152217 | SETBP1    | -1.5 | 2.8E-06 | 2.1E-05 | 4.081 | 0.745 | 3.342 | 5.116 | 5.680 | 0.427 | 5.322 | 6.170 |
| ENSG00000185339 | TCN2      | -1.5 | 4.0E-05 | 0.00022 | 4.057 | 0.590 | 3.426 | 4.735 | 6.006 | 0.130 | 5.826 | 6.138 |
| ENSG00000180998 | GPR137C   | -1.5 | 4.6E-05 | 0.00025 | 3.972 | 0.029 | 3.936 | 4.007 | 6.089 | 0.898 | 5.120 | 6.852 |
| ENSG00000267796 | LIN37     | -1.5 | 1.4E-04 | 0.00065 | 3.965 | 0.465 | 3.290 | 4.355 | 5.210 | 0.332 | 4.922 | 5.515 |
| ENSG00000116117 | PARD3B    | -1.5 | 3.5E-07 | 3.4E-06 | 3.908 | 0.308 | 3.665 | 4.323 | 5.543 | 0.281 | 5.220 | 5.778 |
| ENSG00000114423 | CBLB      | -1.5 | 4.5E-05 | 0.00025 | 3.756 | 0.727 | 3.108 | 4.735 | 5.465 | 0.287 | 5.207 | 5.713 |
| ENSG00000251634 |           | -1.5 | 9.6E-05 | 0.00047 | 3.749 | 0.292 | 3.503 | 4.171 | 5.221 | 0.164 | 5.077 | 5.363 |
| ENSG00000275342 | PRAG1     | -1.5 | 5.8E-05 | 0.0003  | 3.729 | 0.353 | 3.207 | 3.969 | 4.986 | 0.852 | 4.294 | 6.039 |
| ENSG00000146070 | PLA2G7    | -1.5 | 3.2E-03 | 0.00965 | 3.695 | 0.294 | 3.422 | 4.036 | 5.347 | 0.206 | 5.040 | 5.482 |
| ENSG00000119865 | CNRIP1    | -1.5 | 1.6E-04 | 0.00073 | 3.634 | 0.474 | 3.014 | 4.170 | 4.655 | 0.344 | 4.407 | 5.136 |
| ENSG00000218890 |           | -1.5 | 6.8E-03 | 0.01805 | 3.565 | 0.582 | 2.948 | 4.085 | 4.890 | 1.227 | 3.558 | 5.933 |
| ENSG00000249069 | LINC01033 | -1.5 | 2.2E-03 | 0.00702 | 3.529 | 0.322 | 3.087 | 3.770 | 5.052 | 0.307 | 4.723 | 5.314 |
| ENSG00000077063 | CTTNBP2   | -1.5 | 1.7E-06 | 1.4E-05 | 3.481 | 0.200 | 3.219 | 3.697 | 4.719 | 0.175 | 4.599 | 4.979 |
| ENSG00000185070 | FLRT2     | -1.5 | 6.7E-08 | 8.1E-07 | 3.332 | 0.148 | 3.199 | 3.474 | 4.688 | 0.432 | 4.202 | 5.051 |
| ENSG00000138028 | CGREF1    | -1.5 | 5.3E-05 | 0.00028 | 3.271 | 0.461 | 2.768 | 3.701 | 4.449 | 0.541 | 4.161 | 5.261 |
| ENSG00000279369 |           | -1.5 | 7.9E-04 | 0.00294 | 3.247 | 0.529 | 2.606 | 3.863 | 4.999 | 0.804 | 4.148 | 5.685 |
| ENSG00000277462 | ZNF670    | -1.5 | 5.0E-03 | 0.01391 | 3.147 | 0.530 | 2.655 | 3.775 | 4.718 | 0.793 | 3.545 | 5.201 |
| ENSG00000182168 | UNC5C     | -1.5 | 3.2E-06 | 2.4E-05 | 3.082 | 0.390 | 2.561 | 3.498 | 4.386 | 0.321 | 4.037 | 4.659 |
| ENSG00000250546 |           | -1.5 | 1.0E-03 | 0.00367 | 2.951 | 0.566 | 2.454 | 3.754 | 4.316 | 0.390 | 3.813 | 4.624 |
| ENSG00000218358 | RAET1K    | -1.5 | 1.9E-04 | 0.00084 | 2.910 | 0.133 | 2.733 | 3.039 | 4.428 | 0.509 | 3.920 | 4.866 |
| ENSG00000221994 | ZNF630    | -1.5 | 1.7E-04 | 0.00076 | 2.900 | 0.247 | 2.669 | 3.250 | 3.724 | 0.487 | 3.342 | 4.359 |
| ENSG00000271918 |           | -1.5 | 4.2E-03 | 0.01218 | 2.839 | 0.448 | 2.442 | 3.445 | 4.060 | 0.572 | 3.610 | 4.899 |
| ENSG00000235109 | ZSCAN31   | -1.5 | 4.5E-05 | 0.00025 | 2.728 | 0.333 | 2.410 | 3.197 | 3.767 | 0.494 | 3.215 | 4.184 |

|                 |               |      |         |         |       |       |       |       |       |       |       |       |
|-----------------|---------------|------|---------|---------|-------|-------|-------|-------|-------|-------|-------|-------|
| ENSG00000258405 | ZNF578        | -1.5 | 1.1E-05 | 7.2E-05 | 2.664 | 0.248 | 2.384 | 2.914 | 3.856 | 0.414 | 3.318 | 4.181 |
| ENSG00000214892 | USP8P1        | -1.5 | 2.1E-02 | 0.04662 | 0.688 | 0.134 | 0.560 | 0.842 | 0.926 | 0.188 | 0.691 | 1.078 |
| ENSG00000153832 | FBXO36        | -1.5 | 6.4E-04 | 0.00243 | 2.586 | 0.351 | 2.109 | 2.950 | 3.918 | 0.349 | 3.424 | 4.165 |
| ENSG00000106804 | C5            | -1.5 | 5.3E-05 | 0.00028 | 2.570 | 0.412 | 2.070 | 3.051 | 3.672 | 0.566 | 2.909 | 4.103 |
| ENSG00000272870 |               | -1.5 | 5.6E-04 | 0.00217 | 2.492 | 0.406 | 1.954 | 2.938 | 3.511 | 0.303 | 3.226 | 3.773 |
| ENSG00000250120 | PCDHA10       | -1.5 | 1.4E-05 | 8.8E-05 | 2.452 | 0.319 | 2.127 | 2.762 | 3.713 | 0.523 | 3.106 | 4.150 |
| ENSG00000270964 |               | -1.5 | 5.8E-03 | 0.01591 | 2.426 | 0.379 | 2.098 | 2.946 | 3.119 | 0.606 | 2.706 | 3.990 |
| ENSG00000260589 | STAM-AS1      | -1.5 | 2.7E-03 | 0.00828 | 2.346 | 0.575 | 1.757 | 3.069 | 3.410 | 0.499 | 2.663 | 3.689 |
| ENSG00000233822 | HIST1H2BN     | -1.5 | 6.4E-05 | 0.00033 | 2.225 | 0.157 | 2.025 | 2.386 | 3.298 | 0.043 | 3.262 | 3.350 |
| ENSG00000272711 |               | -1.5 | 5.7E-03 | 0.01572 | 2.142 | 0.425 | 1.652 | 2.570 | 3.046 | 0.182 | 2.777 | 3.182 |
| ENSG00000183671 | GPR1          | -1.5 | 2.3E-03 | 0.00727 | 2.128 | 0.325 | 1.838 | 2.586 | 2.992 | 0.257 | 2.613 | 3.153 |
| ENSG00000166578 | IQCD          | -1.5 | 1.8E-03 | 0.006   | 2.046 | 0.167 | 1.918 | 2.279 | 3.142 | 0.326 | 2.682 | 3.372 |
| ENSG00000270876 | ZNF30-AS1     | -1.5 | 2.8E-02 | 0.05994 | 4.307 | 0.931 | 3.019 | 5.071 | 6.876 | 0.617 | 6.439 | 7.791 |
| ENSG00000187624 | C17orf97      | -1.5 | 8.8E-03 | 0.02253 | 1.798 | 0.393 | 1.462 | 2.299 | 2.645 | 0.201 | 2.473 | 2.851 |
| ENSG00000176771 | NCKAP5        | -1.5 | 1.3E-05 | 8.5E-05 | 1.780 | 0.050 | 1.712 | 1.828 | 2.483 | 0.153 | 2.405 | 2.713 |
| ENSG00000250492 | INTS6P1       | -1.5 | 2.1E-03 | 0.00676 | 1.744 | 0.149 | 1.544 | 1.877 | 2.504 | 0.405 | 2.018 | 2.838 |
| ENSG00000137672 | TRPC6         | -1.5 | 8.0E-04 | 0.00298 | 1.697 | 0.359 | 1.193 | 1.968 | 2.333 | 0.116 | 2.224 | 2.497 |
| ENSG00000130518 | KIAA1683      | -1.5 | 2.5E-05 | 0.00015 | 1.687 | 0.068 | 1.616 | 1.774 | 2.427 | 0.121 | 2.335 | 2.591 |
| ENSG00000146674 | IGFBP3        | -1.5 | 9.4E-04 | 0.00343 | 1.658 | 0.182 | 1.431 | 1.858 | 2.300 | 0.050 | 2.234 | 2.338 |
| ENSG00000178568 | ERBB4         | -1.5 | 1.2E-04 | 0.00059 | 1.640 | 0.199 | 1.353 | 1.783 | 2.344 | 0.286 | 2.028 | 2.586 |
| ENSG00000270011 | ZNF559-ZNF177 | -1.5 | 6.5E-02 | 0.11928 | 0.583 | 0.146 | 0.371 | 0.699 | 0.781 | 0.301 | 0.339 | 0.970 |
| ENSG00000049192 | ADAMTS6       | -1.5 | 1.5E-03 | 0.00498 | 1.581 | 0.268 | 1.318 | 1.891 | 2.082 | 0.206 | 1.841 | 2.253 |
| ENSG00000134532 | SOX5          | -1.5 | 2.2E-05 | 0.00013 | 1.560 | 0.243 | 1.239 | 1.806 | 2.216 | 0.280 | 1.812 | 2.457 |
| ENSG00000138653 | NDST4         | -1.5 | 1.7E-03 | 0.00561 | 1.550 | 0.118 | 1.438 | 1.717 | 2.086 | 0.221 | 1.904 | 2.408 |
| ENSG00000150636 | CCDC102B      | -1.5 | 1.1E-03 | 0.00404 | 1.448 | 0.065 | 1.382 | 1.536 | 1.874 | 0.193 | 1.759 | 2.163 |
| ENSG00000205592 | MUC19         | -1.5 | 5.8E-03 | 0.01576 | 1.441 | 0.215 | 1.136 | 1.639 | 2.230 | 0.474 | 1.726 | 2.635 |
| ENSG00000196724 | ZNF418        | -1.5 | 2.7E-03 | 0.00847 | 1.435 | 0.247 | 1.144 | 1.695 | 2.301 | 0.372 | 1.967 | 2.623 |
| ENSG00000180592 | SKIDA1        | -1.5 | 8.3E-05 | 0.00042 | 1.415 | 0.154 | 1.197 | 1.537 | 1.957 | 0.217 | 1.641 | 2.138 |
| ENSG00000103460 | TOX3          | -1.5 | 6.7E-03 | 0.01783 | 1.373 | 0.453 | 0.938 | 1.981 | 1.866 | 0.301 | 1.681 | 2.310 |
| ENSG00000105792 | CFAP69        | -1.5 | 7.6E-04 | 0.00284 | 1.359 | 0.139 | 1.187 | 1.517 | 1.860 | 0.029 | 1.832 | 1.885 |
| ENSG00000157168 | NRG1          | -1.5 | 8.2E-05 | 0.00041 | 1.309 | 0.154 | 1.113 | 1.471 | 1.769 | 0.145 | 1.636 | 1.975 |
| ENSG00000260339 | HEXA-AS1      | -1.5 | 6.2E-03 | 0.01669 | 1.243 | 0.133 | 1.058 | 1.374 | 1.787 | 0.352 | 1.409 | 2.087 |
| ENSG00000141934 | PLPP2         | -1.5 | 3.0E-04 | 0.00127 | 1.214 | 0.127 | 1.063 | 1.368 | 1.641 | 0.149 | 1.514 | 1.801 |
| ENSG00000235618 | FAM21EP       | -1.5 | 6.5E-03 | 0.0174  | 1.152 | 0.136 | 1.033 | 1.295 | 1.651 | 0.303 | 1.491 | 2.105 |
| ENSG00000269906 |               | -1.5 | 5.9E-02 | 0.10913 | 3.546 | 1.788 | 1.883 | 5.931 | 5.548 | 0.580 | 4.703 | 6.024 |
| ENSG00000231458 |               | -1.5 | 7.1E-02 | 0.12671 | 3.048 | 0.418 | 2.714 | 3.636 | 4.967 | 1.610 | 3.566 | 6.361 |
| ENSG00000250790 |               | -1.5 | 7.8E-02 | 0.1379  | 0.642 | 0.271 | 0.282 | 0.916 | 0.965 | 0.164 | 0.722 | 1.085 |
| ENSG00000166262 | FAM227B       | -1.5 | 7.6E-03 | 0.02001 | 1.125 | 0.079 | 1.048 | 1.234 | 1.372 | 0.354 | 1.025 | 1.866 |

|                 |            |      |         |          |         |        |         |         |         |        |         |         |
|-----------------|------------|------|---------|----------|---------|--------|---------|---------|---------|--------|---------|---------|
| ENSG00000152402 | GUCY1A2    | -1.5 | 1.1E-04 | 0.00054  | 1.111   | 0.164  | 0.903   | 1.285   | 1.570   | 0.080  | 1.488   | 1.638   |
| ENSG00000259275 |            | -1.5 | 6.7E-03 | 0.01787  | 0.993   | 0.115  | 0.890   | 1.098   | 1.607   | 0.412  | 1.153   | 1.956   |
| ENSG00000169031 | COL4A3     | -1.5 | 2.1E-04 | 0.00092  | 0.941   | 0.137  | 0.755   | 1.075   | 1.387   | 0.125  | 1.200   | 1.451   |
| ENSG00000137090 | DMRT1      | -1.5 | 8.3E-03 | 0.02155  | 0.915   | 0.191  | 0.792   | 1.197   | 1.273   | 0.116  | 1.159   | 1.373   |
| ENSG00000109906 | ZBTB16     | -1.5 | 6.9E-04 | 0.00261  | 0.886   | 0.171  | 0.666   | 1.057   | 1.249   | 0.137  | 1.177   | 1.454   |
| ENSG00000106483 | SFRP4      | -1.5 | 8.9E-03 | 0.02278  | 0.849   | 0.232  | 0.510   | 1.036   | 1.192   | 0.132  | 1.027   | 1.350   |
| ENSG00000176884 | GRIN1      | -1.5 | 2.7E-03 | 0.00837  | 0.727   | 0.071  | 0.648   | 0.818   | 1.006   | 0.032  | 0.980   | 1.053   |
| ENSG00000258472 |            | -1.5 | 1.2E-02 | 0.02923  | 0.853   | 0.092  | 0.777   | 0.980   | 1.126   | 0.090  | 1.025   | 1.202   |
| ENSG00000247728 |            | -1.5 | 1.3E-02 | 0.03117  | 3.168   | 0.586  | 2.346   | 3.654   | 4.624   | 0.295  | 4.232   | 4.852   |
| ENSG00000240291 |            | -1.5 | 1.3E-02 | 0.03147  | 3.290   | 0.854  | 2.012   | 3.794   | 4.952   | 0.892  | 3.679   | 5.571   |
| ENSG00000246528 |            | -1.5 | 1.5E-02 | 0.03603  | 1.755   | 0.273  | 1.359   | 1.979   | 2.446   | 0.451  | 2.128   | 3.114   |
| ENSG00000254427 |            | -1.5 | 1.6E-02 | 0.03816  | 1.922   | 0.187  | 1.723   | 2.144   | 3.205   | 0.510  | 2.504   | 3.584   |
| ENSG00000283403 |            | -1.5 | 1.7E-02 | 0.04008  | 1.260   | 0.531  | 0.891   | 2.021   | 1.919   | 0.154  | 1.758   | 2.050   |
| ENSG00000262728 |            | -1.5 | 1.8E-02 | 0.04057  | 2.331   | 0.656  | 1.866   | 3.303   | 3.117   | 0.585  | 2.723   | 3.963   |
| ENSG00000226468 |            | -1.5 | 1.8E-02 | 0.04173  | 3.867   | 0.984  | 2.935   | 5.195   | 5.946   | 1.269  | 4.044   | 6.614   |
| ENSG00000226754 |            | -1.5 | 2.0E-02 | 0.04465  | 2.283   | 0.520  | 1.686   | 2.769   | 3.273   | 0.461  | 2.926   | 3.953   |
| ENSG00000271888 |            | -1.5 | 2.1E-02 | 0.04713  | 2.799   | 0.862  | 1.750   | 3.859   | 3.764   | 0.505  | 3.434   | 4.517   |
| ENSG00000226471 |            | -1.5 | 2.9E-02 | 0.06177  | 1.684   | 0.321  | 1.348   | 2.119   | 2.164   | 0.549  | 1.736   | 2.885   |
| ENSG00000251867 |            | -1.5 | 3.1E-02 | 0.06397  | 2.074   | 0.339  | 1.618   | 2.432   | 2.969   | 0.163  | 2.736   | 3.115   |
| ENSG00000272720 |            | -1.5 | 4.4E-02 | 0.08549  | 1.584   | 0.434  | 1.283   | 2.212   | 2.562   | 1.059  | 1.096   | 3.340   |
| ENSG00000260244 |            | -1.5 | 4.6E-02 | 0.08883  | 0.915   | 0.112  | 0.774   | 1.022   | 1.464   | 0.586  | 0.781   | 1.952   |
| ENSG00000279145 |            | -1.5 | 4.6E-02 | 0.09005  | 0.370   | 0.139  | 0.216   | 0.535   | 0.568   | 0.050  | 0.498   | 0.603   |
| ENSG00000120675 | DNAJC15    | -1.5 | 7.6E-03 | 0.01987  | 0.601   | 0.114  | 0.445   | 0.704   | 0.917   | 0.103  | 0.762   | 0.972   |
| ENSG00000148848 | ADAM12     | -1.5 | 5.2E-03 | 0.01449  | 0.503   | 0.063  | 0.419   | 0.563   | 0.812   | 0.224  | 0.574   | 1.003   |
| ENSG00000148053 | NTRK2      | -1.5 | 7.8E-04 | 0.00291  | 0.341   | 0.033  | 0.314   | 0.389   | 0.432   | 0.063  | 0.392   | 0.525   |
| ENSG00000134294 | SLC38A2    | -1.6 | 1.3E-05 | 8.4E-05  | 156.295 | 12.379 | 138.171 | 166.136 | 227.095 | 7.191  | 216.333 | 231.021 |
| ENSG00000271614 | ATP2B1-AS1 | -1.6 | 1.3E-02 | 0.03193  | 0.648   | 0.071  | 0.548   | 0.709   | 0.965   | 0.100  | 0.879   | 1.064   |
| ENSG00000135679 | MDM2       | -1.6 | 1.9E-07 | 2.1E-06  | 126.284 | 6.528  | 120.470 | 135.597 | 201.327 | 21.664 | 178.536 | 219.843 |
| ENSG00000177606 | JUN        | -1.6 | 2.4E-11 | 7.24E-10 | 93.578  | 5.503  | 86.620  | 98.780  | 141.456 | 1.989  | 138.844 | 143.685 |
| ENSG00000135346 | CGA        | -1.6 | 1.8E-02 | 0.04135  | 1.066   | 0.284  | 0.826   | 1.474   | 1.518   | 0.223  | 1.307   | 1.832   |
| ENSG00000230043 | TMSB4XP6   | -1.6 | 8.2E-05 | 0.00041  | 57.032  | 9.639  | 48.422  | 70.762  | 82.630  | 5.452  | 75.415  | 88.664  |
| ENSG00000259051 | HNRNPUP1   | -1.6 | 1.5E-06 | 1.3E-05  | 52.348  | 7.685  | 45.333  | 59.105  | 77.852  | 2.078  | 76.654  | 80.965  |
| ENSG00000149212 | SESN3      | -1.6 | 1.6E-04 | 0.00074  | 49.564  | 5.359  | 41.540  | 52.601  | 77.638  | 6.782  | 70.716  | 83.459  |
| ENSG00000114315 | HES1       | -1.6 | 3.6E-11 | 1E-09    | 48.436  | 3.362  | 44.536  | 52.714  | 74.558  | 0.335  | 74.122  | 74.940  |
| ENSG00000137193 | PIM1       | -1.6 | 9.3E-11 | 2.5E-09  | 45.417  | 2.945  | 41.254  | 48.055  | 67.591  | 3.549  | 64.845  | 72.290  |
| ENSG00000116574 | RHOU       | -1.6 | 1.7E-12 | 7.85E-11 | 45.360  | 1.014  | 44.765  | 46.875  | 67.865  | 2.004  | 65.350  | 69.479  |
| ENSG00000165655 | ZNF503     | -1.6 | 1.0E-09 | 2E-08    | 44.567  | 2.657  | 41.814  | 47.135  | 66.814  | 0.551  | 66.174  | 67.521  |
| ENSG00000250337 | LINC01021  | -1.6 | 4.5E-04 | 0.00182  | 43.418  | 5.541  | 35.229  | 46.856  | 69.712  | 9.357  | 58.891  | 77.532  |

|                 |           |      |         |          |        |       |        |        |        |        |        |        |
|-----------------|-----------|------|---------|----------|--------|-------|--------|--------|--------|--------|--------|--------|
| ENSG00000232956 | SNHG15    | -1.6 | 3.4E-11 | 9.92E-10 | 42.701 | 0.847 | 41.565 | 43.507 | 61.650 | 1.235  | 60.587 | 62.884 |
| ENSG00000198734 | F5        | -1.6 | 1.6E-02 | 0.03785  | 0.306  | 0.058 | 0.249  | 0.385  | 0.495  | 0.056  | 0.417  | 0.535  |
| ENSG00000173530 | TNFRSF10D | -1.6 | 7.8E-12 | 2.80E-10 | 38.107 | 1.786 | 36.046 | 40.200 | 55.522 | 0.841  | 54.504 | 56.563 |
| ENSG00000128610 | FEZF1     | -1.6 | 1.7E-02 | 0.03917  | 0.844  | 0.237 | 0.662  | 1.192  | 1.172  | 0.227  | 0.986  | 1.503  |
| ENSG00000162772 | ATF3      | -1.6 | 3.1E-06 | 2.4E-05  | 35.504 | 2.759 | 31.675 | 37.582 | 51.476 | 2.729  | 47.397 | 53.150 |
| ENSG00000115414 | FN1       | -1.6 | 1.7E-10 | 4.1E-09  | 31.975 | 2.550 | 28.162 | 33.535 | 48.593 | 0.861  | 48.109 | 49.883 |
| ENSG00000054598 | FOXC1     | -1.6 | 2.2E-10 | 5.3E-09  | 30.799 | 2.467 | 29.113 | 34.371 | 47.052 | 2.399  | 44.972 | 49.130 |
| ENSG00000115274 | INO80B    | -1.6 | 1.7E-02 | 0.03969  | 1.467  | 0.407 | 1.023  | 1.912  | 1.936  | 0.060  | 1.887  | 2.009  |
| ENSG00000150687 | PRSS23    | -1.6 | 2.8E-12 | 1.19E-10 | 24.660 | 0.897 | 23.323 | 25.240 | 36.402 | 0.284  | 36.105 | 36.788 |
| ENSG00000121621 | KIF18A    | -1.6 | 8.8E-03 | 0.02253  | 24.400 | 3.327 | 20.708 | 27.694 | 36.015 | 3.468  | 31.093 | 38.449 |
| ENSG00000102554 | KLF5      | -1.6 | 1.3E-10 | 3.3E-09  | 23.482 | 1.164 | 21.933 | 24.708 | 35.003 | 0.508  | 34.257 | 35.326 |
| ENSG00000138182 | KIF20B    | -1.6 | 7.5E-02 | 0.13368  | 28.277 | 7.151 | 20.673 | 36.105 | 47.132 | 13.566 | 30.151 | 58.078 |
| ENSG00000115963 | RND3      | -1.6 | 7.2E-07 | 6.6E-06  | 23.085 | 0.895 | 22.157 | 23.951 | 33.330 | 0.968  | 31.949 | 34.003 |
| ENSG00000231160 | KLF3-AS1  | -1.6 | 2.4E-02 | 0.05162  | 0.606  | 0.344 | 0.254  | 0.999  | 0.956  | 0.098  | 0.833  | 1.073  |
| ENSG00000104081 | BMF       | -1.6 | 1.3E-11 | 4.35E-10 | 20.234 | 0.925 | 18.996 | 21.033 | 30.903 | 1.488  | 28.694 | 31.945 |
| ENSG00000144214 | LYG1      | -1.6 | 2.5E-02 | 0.05328  | 2.883  | 1.303 | 1.450  | 4.204  | 4.332  | 0.748  | 3.240  | 4.817  |
| ENSG00000163659 | TIPARP    | -1.6 | 3.0E-10 | 6.8E-09  | 18.313 | 1.124 | 17.430 | 19.895 | 26.728 | 0.718  | 25.672 | 27.180 |
| ENSG00000196812 | ZSCAN16   | -1.6 | 1.3E-06 | 1.1E-05  | 17.157 | 2.017 | 15.361 | 19.301 | 25.203 | 1.730  | 24.242 | 27.797 |
| ENSG00000168743 | NPNT      | -1.6 | 2.3E-08 | 3.1E-07  | 17.059 | 1.623 | 14.884 | 18.304 | 26.715 | 2.578  | 24.051 | 28.924 |
| ENSG00000086967 | MYBPC2    | -1.6 | 2.1E-02 | 0.04619  | 0.575  | 0.132 | 0.424  | 0.744  | 0.837  | 0.101  | 0.695  | 0.932  |
| ENSG00000101384 | JAG1      | -1.6 | 2.6E-10 | 6.1E-09  | 16.370 | 0.753 | 15.257 | 16.907 | 24.306 | 0.963  | 22.861 | 24.789 |
| ENSG00000197168 | NEK5      | -1.6 | 1.0E-02 | 0.02527  | 0.394  | 0.124 | 0.286  | 0.569  | 0.586  | 0.123  | 0.474  | 0.692  |
| ENSG00000251095 |           | -1.6 | 1.3E-06 | 1.1E-05  | 15.768 | 0.893 | 14.587 | 16.758 | 22.492 | 0.847  | 21.244 | 23.139 |
| ENSG00000213315 |           | -1.6 | 2.0E-04 | 0.00088  | 15.427 | 2.120 | 13.875 | 18.557 | 22.993 | 1.526  | 21.898 | 25.134 |
| ENSG00000116991 | SIPA1L2   | -1.6 | 2.0E-10 | 4.9E-09  | 13.554 | 0.887 | 12.656 | 14.673 | 19.985 | 1.038  | 18.959 | 20.879 |
| ENSG00000261934 | PCDHGA9   | -1.6 | 1.4E-02 | 0.03236  | 0.631  | 0.224 | 0.334  | 0.853  | 1.116  | 0.228  | 0.794  | 1.277  |
| ENSG00000049130 | KITLG     | -1.6 | 1.1E-04 | 0.00052  | 13.033 | 0.069 | 12.943 | 13.091 | 20.446 | 2.448  | 17.506 | 22.463 |
| ENSG00000270605 |           | -1.6 | 2.3E-07 | 2.4E-06  | 12.924 | 2.226 | 10.106 | 14.971 | 19.675 | 0.961  | 18.817 | 20.506 |
| ENSG00000230847 |           | -1.6 | 8.2E-05 | 0.00042  | 12.780 | 1.838 | 11.193 | 15.366 | 18.861 | 1.570  | 18.045 | 21.217 |
| ENSG00000183496 | MEX3B     | -1.6 | 1.4E-09 | 2.7E-08  | 11.831 | 0.585 | 10.990 | 12.347 | 17.605 | 0.913  | 16.306 | 18.242 |
| ENSG00000125398 | SOX9      | -1.6 | 1.4E-08 | 2E-07    | 11.735 | 0.443 | 11.189 | 12.183 | 17.456 | 0.126  | 17.285 | 17.589 |
| ENSG00000145687 | SSBP2     | -1.6 | 1.6E-11 | 5.19E-10 | 11.129 | 0.365 | 10.730 | 11.496 | 16.605 | 0.644  | 15.677 | 17.040 |
| ENSG00000266490 |           | -1.6 | 3.2E-03 | 0.0096   | 10.312 | 2.554 | 7.957  | 13.292 | 15.435 | 1.250  | 13.600 | 16.230 |
| ENSG00000169851 | PCDH7     | -1.6 | 2.4E-10 | 5.6E-09  | 10.047 | 0.797 | 9.359  | 10.908 | 15.554 | 0.882  | 14.495 | 16.281 |
| ENSG00000184349 | EFNA5     | -1.6 | 1.1E-09 | 2.1E-08  | 9.571  | 0.259 | 9.239  | 9.871  | 14.421 | 0.455  | 13.744 | 14.733 |
| ENSG00000129757 | CDKN1C    | -1.6 | 1.1E-07 | 1.2E-06  | 9.315  | 0.618 | 8.426  | 9.755  | 13.591 | 0.613  | 13.009 | 14.457 |
| ENSG00000180530 | NRIP1     | -1.6 | 2.4E-05 | 0.00014  | 9.178  | 0.919 | 7.976  | 10.164 | 13.684 | 1.290  | 12.408 | 14.795 |
| ENSG00000267178 | PHF5CP    | -1.6 | 7.6E-03 | 0.01995  | 9.156  | 0.891 | 7.906  | 9.897  | 14.760 | 1.830  | 12.382 | 16.199 |



|                 |            |      |         |         |       |       |       |        |        |       |        |        |
|-----------------|------------|------|---------|---------|-------|-------|-------|--------|--------|-------|--------|--------|
| ENSG00000146592 | CREB5      | -1.6 | 1.8E-07 | 1.9E-06 | 8.791 | 0.694 | 7.786 | 9.333  | 13.105 | 0.289 | 12.742 | 13.338 |
| ENSG00000151623 | NR3C2      | -1.6 | 3.1E-09 | 5.3E-08 | 8.357 | 0.413 | 7.949 | 8.791  | 12.452 | 0.722 | 11.986 | 13.528 |
| ENSG00000270067 |            | -1.6 | 6.3E-04 | 0.00242 | 8.354 | 1.642 | 6.346 | 9.771  | 11.851 | 1.015 | 10.331 | 12.401 |
| ENSG00000265254 |            | -1.6 | 4.4E-03 | 0.01263 | 7.923 | 2.815 | 3.828 | 10.108 | 13.329 | 2.171 | 11.427 | 15.210 |
| ENSG00000158406 | HIST1H4H   | -1.6 | 6.5E-06 | 4.5E-05 | 7.919 | 1.297 | 6.325 | 9.433  | 11.767 | 0.493 | 11.039 | 12.130 |
| ENSG00000116106 | EPHA4      | -1.6 | 2.6E-08 | 3.5E-07 | 7.552 | 0.830 | 6.641 | 8.473  | 11.240 | 0.925 | 10.356 | 12.038 |
| ENSG00000169184 | MN1        | -1.6 | 1.4E-07 | 1.5E-06 | 7.221 | 0.762 | 6.091 | 7.765  | 11.142 | 0.425 | 10.545 | 11.448 |
| ENSG00000165323 | FAT3       | -1.6 | 5.7E-06 | 4E-05   | 7.006 | 0.853 | 5.881 | 7.921  | 10.903 | 0.485 | 10.419 | 11.320 |
| ENSG00000106546 | AHR        | -1.6 | 2.4E-06 | 1.9E-05 | 6.227 | 0.617 | 5.634 | 7.048  | 9.522  | 0.815 | 8.579  | 10.203 |
| ENSG00000183098 | GPC6       | -1.6 | 2.4E-08 | 3.3E-07 | 6.187 | 0.468 | 5.788 | 6.814  | 9.627  | 1.030 | 8.281  | 10.434 |
| ENSG00000272468 |            | -1.6 | 9.0E-03 | 0.02302 | 5.917 | 1.667 | 4.134 | 7.862  | 8.655  | 2.060 | 7.342  | 11.677 |
| ENSG00000245205 | EEF1A1P4   | -1.6 | 3.2E-04 | 0.00136 | 5.464 | 1.091 | 4.677 | 7.012  | 7.892  | 0.723 | 6.811  | 8.330  |
| ENSG00000157445 | CACNA2D3   | -1.6 | 9.0E-07 | 8E-06   | 5.340 | 0.710 | 4.310 | 5.938  | 7.887  | 0.250 | 7.687  | 8.203  |
| ENSG00000232368 | FTLP2      | -1.6 | 8.9E-03 | 0.0227  | 5.135 | 1.217 | 3.939 | 6.799  | 8.529  | 0.772 | 7.469  | 9.321  |
| ENSG00000270681 |            | -1.6 | 2.7E-04 | 0.00115 | 5.110 | 0.587 | 4.239 | 5.517  | 7.149  | 0.934 | 5.785  | 7.903  |
| ENSG00000213453 | FTH1P3     | -1.6 | 5.7E-03 | 0.01573 | 5.049 | 0.457 | 4.494 | 5.608  | 7.067  | 1.937 | 5.527  | 9.546  |
| ENSG00000278974 |            | -1.6 | 1.7E-03 | 0.00564 | 4.962 | 0.567 | 4.421 | 5.623  | 7.305  | 1.358 | 5.270  | 8.028  |
| ENSG00000135547 | HEY2       | -1.6 | 1.2E-05 | 8E-05   | 4.894 | 0.553 | 4.415 | 5.397  | 7.118  | 0.440 | 6.752  | 7.634  |
| ENSG00000189184 | PCDH18     | -1.6 | 1.6E-07 | 1.8E-06 | 4.776 | 0.483 | 4.402 | 5.475  | 7.203  | 0.418 | 6.909  | 7.824  |
| ENSG00000254480 |            | -1.6 | 7.3E-03 | 0.01916 | 4.692 | 1.062 | 3.404 | 6.003  | 6.374  | 0.545 | 5.575  | 6.800  |
| ENSG00000162599 | NFIA       | -1.6 | 6.6E-08 | 8E-07   | 4.672 | 0.307 | 4.281 | 4.987  | 6.888  | 0.093 | 6.824  | 7.022  |
| ENSG00000265962 | GACAT2     | -1.6 | 2.4E-03 | 0.00754 | 4.595 | 0.724 | 3.845 | 5.330  | 6.875  | 1.584 | 4.801  | 8.658  |
| ENSG00000150630 | VEGFC      | -1.6 | 1.7E-04 | 0.00078 | 4.374 | 0.721 | 3.481 | 5.157  | 6.237  | 0.373 | 5.999  | 6.784  |
| ENSG00000104313 | EYA1       | -1.6 | 7.5E-05 | 0.00038 | 4.330 | 0.593 | 3.924 | 5.211  | 6.568  | 0.770 | 5.604  | 7.190  |
| ENSG00000118898 | PPL        | -1.6 | 1.8E-08 | 2.6E-07 | 4.300 | 0.385 | 4.030 | 4.871  | 6.271  | 0.332 | 5.968  | 6.743  |
| ENSG00000228451 | SDAD1P1    | -1.6 | 2.7E-05 | 0.00015 | 4.289 | 0.320 | 3.869 | 4.636  | 6.435  | 0.314 | 6.035  | 6.685  |
| ENSG00000151012 | SLC7A11    | -1.6 | 1.9E-04 | 0.00087 | 4.157 | 0.267 | 3.815 | 4.436  | 6.303  | 0.375 | 5.791  | 6.583  |
| ENSG00000169432 | SCN9A      | -1.6 | 7.6E-07 | 6.9E-06 | 4.077 | 0.265 | 3.687 | 4.275  | 6.452  | 0.597 | 5.850  | 6.966  |
| ENSG00000114861 | FOXP1      | -1.6 | 1.6E-07 | 1.7E-06 | 3.929 | 0.396 | 3.691 | 4.521  | 5.687  | 0.155 | 5.590  | 5.917  |
| ENSG00000188177 | ZC3H6      | -1.6 | 2.7E-07 | 2.8E-06 | 3.815 | 0.295 | 3.397 | 4.078  | 5.734  | 0.397 | 5.210  | 6.042  |
| ENSG00000077092 | RARB       | -1.6 | 4.1E-06 | 3E-05   | 3.715 | 0.343 | 3.483 | 4.226  | 5.414  | 0.456 | 4.876  | 5.991  |
| ENSG00000240498 | CDKN2B-AS1 | -1.6 | 1.3E-06 | 1.1E-05 | 3.510 | 0.233 | 3.238 | 3.796  | 5.193  | 0.414 | 4.800  | 5.551  |
| ENSG00000134533 | RERG       | -1.6 | 5.8E-06 | 4.1E-05 | 3.242 | 0.282 | 2.911 | 3.518  | 4.783  | 0.618 | 4.308  | 5.692  |
| ENSG00000087085 | ACHE       | -1.6 | 1.2E-04 | 0.00057 | 3.039 | 0.285 | 2.867 | 3.464  | 4.977  | 0.984 | 3.581  | 5.894  |
| ENSG00000124813 | RUNX2      | -1.6 | 3.0E-06 | 2.3E-05 | 2.991 | 0.379 | 2.757 | 3.552  | 4.906  | 0.381 | 4.480  | 5.407  |
| ENSG00000176697 | BDNF       | -1.6 | 2.2E-08 | 3E-07   | 2.858 | 0.109 | 2.722 | 2.988  | 4.229  | 0.195 | 4.102  | 4.513  |
| ENSG00000266709 |            | -1.6 | 9.4E-04 | 0.00341 | 2.572 | 0.342 | 2.284 | 3.060  | 3.760  | 0.455 | 3.380  | 4.287  |
| ENSG00000171724 | VAT1L      | -1.6 | 1.8E-02 | 0.04147 | 0.590 | 0.150 | 0.479 | 0.798  | 0.972  | 0.173 | 0.778  | 1.118  |

|                 |             |      |         |         |       |       |       |       |       |       |       |       |
|-----------------|-------------|------|---------|---------|-------|-------|-------|-------|-------|-------|-------|-------|
| ENSG00000179546 | HTR1D       | -1.6 | 4.2E-04 | 0.00171 | 2.484 | 0.483 | 1.997 | 3.026 | 3.539 | 0.385 | 3.208 | 3.918 |
| ENSG00000137727 | ARHGAP20    | -1.6 | 5.1E-06 | 3.7E-05 | 2.399 | 0.288 | 2.141 | 2.709 | 3.777 | 0.441 | 3.253 | 4.142 |
| ENSG00000231154 | MORF4L2-AS1 | -1.6 | 6.9E-04 | 0.00261 | 2.327 | 0.299 | 2.111 | 2.754 | 3.797 | 0.720 | 2.855 | 4.359 |
| ENSG00000230069 | LRRC37A15P  | -1.6 | 5.0E-03 | 0.01393 | 2.203 | 0.722 | 1.356 | 3.070 | 3.288 | 0.471 | 2.613 | 3.710 |
| ENSG00000203740 | METTL11B    | -1.6 | 4.3E-03 | 0.01237 | 2.191 | 0.579 | 1.810 | 3.053 | 3.208 | 0.499 | 2.783 | 3.743 |
| ENSG00000033122 | LRRC7       | -1.6 | 3.5E-07 | 3.5E-06 | 2.083 | 0.226 | 1.792 | 2.312 | 3.157 | 0.084 | 3.065 | 3.270 |
| ENSG00000205323 | SARNP       | -1.6 | 1.4E-03 | 0.00482 | 2.079 | 0.499 | 1.488 | 2.683 | 2.826 | 0.047 | 2.775 | 2.866 |
| ENSG00000259495 |             | -1.6 | 1.2E-05 | 7.7E-05 | 2.023 | 0.303 | 1.753 | 2.349 | 3.059 | 0.136 | 2.860 | 3.146 |
| ENSG00000229619 | MBNL1-AS1   | -1.6 | 1.4E-05 | 8.9E-05 | 2.012 | 0.225 | 1.887 | 2.349 | 3.133 | 0.358 | 2.767 | 3.440 |
| ENSG00000198153 | ZNF849P     | -1.6 | 3.4E-03 | 0.01006 | 1.993 | 0.371 | 1.548 | 2.347 | 2.793 | 0.243 | 2.544 | 3.127 |
| ENSG00000241170 |             | -1.6 | 2.2E-03 | 0.00705 | 1.864 | 0.470 | 1.334 | 2.440 | 3.119 | 0.371 | 2.732 | 3.437 |
| ENSG00000256304 | CCDC150P1   | -1.6 | 1.3E-03 | 0.00453 | 1.743 | 0.279 | 1.349 | 2.005 | 2.374 | 0.259 | 2.233 | 2.761 |
| ENSG00000257261 |             | -1.6 | 3.1E-03 | 0.00929 | 1.706 | 0.491 | 1.049 | 2.224 | 2.591 | 0.334 | 2.096 | 2.794 |
| ENSG00000267365 | KCNJ2-AS1   | -1.6 | 2.7E-03 | 0.00845 | 1.705 | 0.495 | 1.020 | 2.195 | 2.414 | 0.077 | 2.316 | 2.505 |
| ENSG00000183336 | BOLA2       | -1.6 | 2.5E-03 | 0.00779 | 1.638 | 0.392 | 1.111 | 2.032 | 2.450 | 0.373 | 2.143 | 2.993 |
| ENSG00000188993 | LRRC66      | -1.6 | 1.5E-03 | 0.00514 | 1.581 | 0.366 | 1.134 | 1.888 | 2.456 | 0.356 | 1.936 | 2.685 |
| ENSG00000165182 | CXorf58     | -1.6 | 4.7E-03 | 0.01338 | 1.552 | 0.475 | 0.980 | 2.022 | 2.459 | 0.286 | 2.174 | 2.856 |
| ENSG00000079102 | RUNX1T1     | -1.6 | 2.0E-06 | 1.6E-05 | 1.512 | 0.205 | 1.231 | 1.675 | 2.280 | 0.161 | 2.105 | 2.416 |
| ENSG00000246876 | LINC02466   | -1.6 | 3.3E-03 | 0.00979 | 1.500 | 0.245 | 1.268 | 1.729 | 2.356 | 0.633 | 1.535 | 3.080 |
| ENSG00000006128 | TAC1        | -1.6 | 9.5E-03 | 0.02403 | 1.492 | 0.406 | 0.944 | 1.897 | 2.404 | 0.190 | 2.131 | 2.535 |
| ENSG00000215386 | MIR99AHG    | -1.6 | 1.8E-04 | 0.00082 | 1.453 | 0.256 | 1.172 | 1.765 | 1.975 | 0.164 | 1.731 | 2.068 |
| ENSG00000114200 | BCHE        | -1.6 | 6.7E-03 | 0.01787 | 1.436 | 0.473 | 0.900 | 2.041 | 2.184 | 0.410 | 1.776 | 2.536 |
| ENSG00000172748 | ZNF596      | -1.6 | 7.1E-05 | 0.00036 | 1.368 | 0.185 | 1.109 | 1.503 | 2.079 | 0.147 | 1.922 | 2.277 |
| ENSG00000178127 | NDUFV2      | -1.6 | 7.9E-03 | 0.02053 | 1.341 | 0.466 | 0.731 | 1.864 | 2.114 | 0.448 | 1.544 | 2.472 |
| ENSG00000186976 | EFCAB6      | -1.6 | 3.6E-06 | 2.7E-05 | 1.298 | 0.150 | 1.121 | 1.441 | 2.071 | 0.060 | 1.983 | 2.107 |
| ENSG00000259315 | ACTG1P17    | -1.6 | 6.2E-03 | 0.01673 | 1.282 | 0.137 | 1.096 | 1.418 | 1.940 | 0.355 | 1.649 | 2.457 |
| ENSG00000138669 | PRKG2       | -1.6 | 2.7E-03 | 0.00828 | 1.190 | 0.337 | 0.883 | 1.665 | 1.571 | 0.321 | 1.310 | 1.965 |
| ENSG00000141431 | ASXL3       | -1.6 | 2.4E-05 | 0.00014 | 1.185 | 0.251 | 0.962 | 1.543 | 1.899 | 0.165 | 1.748 | 2.041 |
| ENSG00000002745 | WNT16       | -1.6 | 8.6E-03 | 0.02206 | 1.132 | 0.429 | 0.798 | 1.762 | 1.857 | 0.114 | 1.686 | 1.925 |
| ENSG00000272345 |             | -1.6 | 7.7E-02 | 0.13663 | 2.523 | 1.676 | 1.209 | 4.740 | 4.219 | 0.780 | 3.266 | 4.856 |
| ENSG00000106536 | POU6F2      | -1.6 | 5.7E-05 | 0.0003  | 1.095 | 0.215 | 0.860 | 1.305 | 1.647 | 0.241 | 1.439 | 1.877 |
| ENSG00000223855 |             | -1.6 | 2.6E-03 | 0.008   | 1.028 | 0.198 | 0.791 | 1.267 | 1.455 | 0.265 | 1.274 | 1.836 |
| ENSG00000156463 | SH3RF2      | -1.6 | 9.6E-05 | 0.00047 | 1.024 | 0.160 | 0.868 | 1.174 | 1.607 | 0.215 | 1.291 | 1.743 |
| ENSG00000182308 | DCAF4L1     | -1.6 | 4.5E-03 | 0.0129  | 0.982 | 0.447 | 0.560 | 1.453 | 1.535 | 0.043 | 1.484 | 1.571 |
| ENSG00000239389 | PCDHA13     | -1.6 | 3.5E-03 | 0.01026 | 0.974 | 0.363 | 0.764 | 1.517 | 1.453 | 0.203 | 1.159 | 1.589 |
| ENSG00000226476 | LINC01748   | -1.6 | 2.5E-05 | 0.00015 | 0.969 | 0.148 | 0.829 | 1.158 | 1.436 | 0.145 | 1.242 | 1.547 |
| ENSG00000008300 | CELSR3      | -1.6 | 5.8E-05 | 0.0003  | 0.964 | 0.109 | 0.816 | 1.071 | 1.363 | 0.115 | 1.265 | 1.483 |
| ENSG00000166923 | GREM1       | -1.6 | 4.5E-05 | 0.00025 | 0.888 | 0.222 | 0.624 | 1.139 | 1.295 | 0.050 | 1.226 | 1.333 |

|                 |           |      |         |          |        |       |        |        |         |        |         |         |
|-----------------|-----------|------|---------|----------|--------|-------|--------|--------|---------|--------|---------|---------|
| ENSG00000265817 | FSBP      | -1.6 | 3.9E-03 | 0.01145  | 0.886  | 0.179 | 0.699  | 1.126  | 1.238   | 0.174  | 1.074   | 1.485   |
| ENSG00000259663 |           | -1.6 | 2.7E-04 | 0.00117  | 0.881  | 0.034 | 0.831  | 0.901  | 1.312   | 0.234  | 1.103   | 1.647   |
| ENSG00000138675 | FGF5      | -1.6 | 2.8E-03 | 0.00865  | 0.860  | 0.219 | 0.627  | 1.154  | 1.269   | 0.177  | 1.117   | 1.449   |
| ENSG00000162814 | SPATA17   | -1.6 | 2.9E-03 | 0.00879  | 0.804  | 0.092 | 0.682  | 0.893  | 1.253   | 0.269  | 0.914   | 1.469   |
| ENSG00000271474 |           | -1.6 | 3.9E-03 | 0.01137  | 0.781  | 0.094 | 0.644  | 0.850  | 1.257   | 0.111  | 1.132   | 1.402   |
| ENSG00000269113 | TRABD2B   | -1.6 | 1.6E-03 | 0.00523  | 0.752  | 0.099 | 0.664  | 0.894  | 1.173   | 0.242  | 0.826   | 1.338   |
| ENSG00000113532 | ST8SIA4   | -1.6 | 4.9E-04 | 0.00195  | 0.712  | 0.138 | 0.605  | 0.915  | 1.068   | 0.069  | 0.991   | 1.126   |
| ENSG00000235100 |           | -1.6 | 1.0E-02 | 0.02534  | 1.847  | 0.481 | 1.333  | 2.360  | 3.129   | 0.230  | 2.852   | 3.319   |
| ENSG00000260572 |           | -1.6 | 1.1E-02 | 0.02765  | 1.600  | 0.244 | 1.453  | 1.964  | 2.183   | 0.062  | 2.107   | 2.233   |
| ENSG00000267731 |           | -1.6 | 1.5E-02 | 0.03452  | 0.895  | 0.271 | 0.543  | 1.185  | 1.625   | 0.415  | 1.130   | 1.968   |
| ENSG00000280426 |           | -1.6 | 1.5E-02 | 0.03625  | 1.662  | 0.492 | 1.255  | 2.278  | 2.212   | 0.246  | 1.884   | 2.482   |
| ENSG00000255129 |           | -1.6 | 2.7E-02 | 0.05723  | 1.397  | 0.509 | 0.821  | 1.861  | 2.326   | 0.319  | 1.848   | 2.498   |
| ENSG00000261560 |           | -1.6 | 2.9E-02 | 0.06027  | 2.085  | 0.681 | 1.473  | 2.812  | 3.298   | 0.981  | 1.830   | 3.842   |
| ENSG00000248774 |           | -1.6 | 3.6E-02 | 0.07229  | 5.280  | 1.242 | 3.802  | 6.338  | 7.798   | 1.604  | 6.331   | 9.187   |
| ENSG00000112175 | BMP5      | -1.6 | 6.4E-03 | 0.01724  | 0.647  | 0.219 | 0.398  | 0.902  | 0.906   | 0.060  | 0.855   | 0.994   |
| ENSG00000141433 | ADCYAP1   | -1.6 | 4.5E-03 | 0.01268  | 0.631  | 0.105 | 0.521  | 0.737  | 1.004   | 0.078  | 0.888   | 1.048   |
| ENSG00000139364 | TMEM132B  | -1.6 | 1.1E-04 | 0.00053  | 0.611  | 0.103 | 0.461  | 0.694  | 0.951   | 0.155  | 0.760   | 1.077   |
| ENSG00000251664 | PCDHA12   | -1.6 | 4.1E-03 | 0.01186  | 0.595  | 0.055 | 0.548  | 0.671  | 0.961   | 0.118  | 0.841   | 1.063   |
| ENSG00000159450 | TCHH      | -1.6 | 4.9E-03 | 0.01368  | 0.550  | 0.096 | 0.427  | 0.657  | 0.934   | 0.009  | 0.921   | 0.943   |
| ENSG00000099260 | PALMD     | -1.6 | 7.3E-04 | 0.00276  | 0.492  | 0.045 | 0.446  | 0.553  | 0.695   | 0.108  | 0.639   | 0.857   |
| ENSG00000156475 | PPP2R2B   | -1.6 | 4.3E-04 | 0.00175  | 0.450  | 0.054 | 0.377  | 0.500  | 0.651   | 0.058  | 0.609   | 0.737   |
| ENSG00000124766 | SOX4      | -1.7 | 4.8E-12 | 1.89E-10 | 80.790 | 4.325 | 75.534 | 85.457 | 125.366 | 4.712  | 121.005 | 129.442 |
| ENSG00000245532 | NEAT1     | -1.7 | 4.6E-08 | 5.9E-07  | 74.286 | 8.061 | 63.288 | 82.604 | 125.039 | 15.588 | 110.923 | 138.531 |
| ENSG00000277449 | CEBPB-AS1 | -1.7 | 1.0E-02 | 0.02535  | 0.882  | 0.326 | 0.475  | 1.273  | 1.351   | 0.286  | 1.205   | 1.780   |
| ENSG00000116717 | GADD45A   | -1.7 | 1.1E-10 | 3E-09    | 57.125 | 3.140 | 53.288 | 60.422 | 91.402  | 3.945  | 86.930  | 96.547  |
| ENSG00000251129 |           | -1.7 | 3.9E-10 | 8.6E-09  | 52.291 | 2.565 | 50.024 | 55.925 | 80.411  | 3.122  | 75.972  | 82.595  |
| ENSG00000170836 | PPM1D     | -1.7 | 3.5E-12 | 1.46E-10 | 44.981 | 1.528 | 42.807 | 46.339 | 69.966  | 2.472  | 66.568  | 71.799  |
| ENSG00000164442 | CITED2    | -1.7 | 1.5E-10 | 3.7E-09  | 43.596 | 2.387 | 40.321 | 46.041 | 66.056  | 1.195  | 65.263  | 67.790  |
| ENSG00000165244 | ZNF367    | -1.7 | 7.9E-12 | 2.83E-10 | 41.180 | 0.878 | 39.981 | 42.094 | 63.914  | 2.685  | 60.350  | 65.986  |
| ENSG00000251022 | THAP9-AS1 | -1.7 | 3.5E-08 | 4.6E-07  | 30.992 | 2.483 | 29.006 | 34.554 | 49.855  | 5.136  | 44.441  | 54.244  |
| ENSG00000002587 | HS3ST1    | -1.7 | 1.3E-02 | 0.03153  | 0.292  | 0.095 | 0.218  | 0.431  | 0.508   | 0.124  | 0.346   | 0.606   |
| ENSG00000113580 | NR3C1     | -1.7 | 3.2E-11 | 9.52E-10 | 22.899 | 1.433 | 20.779 | 23.908 | 35.511  | 2.421  | 32.905  | 37.571  |
| ENSG00000105327 | BBC3      | -1.7 | 1.4E-09 | 2.7E-08  | 21.802 | 1.946 | 19.435 | 24.191 | 35.281  | 0.488  | 34.977  | 36.010  |
| ENSG00000128285 | MCHR1     | -1.7 | 7.3E-02 | 0.13     | 0.285  | 0.135 | 0.103  | 0.401  | 0.497   | 0.126  | 0.326   | 0.593   |
| ENSG00000181449 | SOX2      | -1.7 | 6.0E-10 | 1.3E-08  | 18.719 | 1.378 | 16.770 | 20.016 | 29.536  | 1.595  | 28.119  | 30.918  |
| ENSG00000067082 | KLF6      | -1.7 | 7.8E-13 | 4.08E-11 | 15.771 | 0.455 | 15.138 | 16.198 | 24.958  | 0.621  | 24.358  | 25.494  |
| ENSG00000175745 | NR2F1     | -1.7 | 2.2E-09 | 3.9E-08  | 14.696 | 1.750 | 13.344 | 17.063 | 23.274  | 1.040  | 21.837  | 24.039  |
| ENSG00000096654 | ZNF184    | -1.7 | 1.6E-08 | 2.2E-07  | 14.646 | 1.218 | 13.261 | 15.994 | 23.763  | 1.829  | 22.138  | 25.346  |

|                 |            |      |         |          |        |       |        |        |        |       |        |        |
|-----------------|------------|------|---------|----------|--------|-------|--------|--------|--------|-------|--------|--------|
| ENSG00000150347 | ARID5B     | -1.7 | 3.5E-10 | 7.8E-09  | 14.051 | 0.513 | 13.290 | 14.388 | 22.090 | 0.466 | 21.665 | 22.493 |
| ENSG00000099250 | NRP1       | -1.7 | 1.1E-11 | 3.77E-10 | 13.178 | 0.483 | 12.550 | 13.719 | 21.682 | 1.406 | 20.243 | 22.888 |
| ENSG00000168916 | ZNF608     | -1.7 | 2.8E-09 | 4.7E-08  | 12.589 | 1.296 | 11.018 | 13.736 | 20.287 | 1.169 | 18.882 | 21.250 |
| ENSG00000115461 | IGFBP5     | -1.7 | 2.8E-10 | 6.4E-09  | 11.682 | 1.169 | 10.033 | 12.792 | 18.532 | 0.628 | 18.065 | 19.458 |
| ENSG00000150551 | LYPD1      | -1.7 | 1.6E-09 | 2.9E-08  | 11.668 | 0.553 | 10.846 | 12.002 | 18.389 | 0.994 | 17.528 | 19.286 |
| ENSG00000185630 | PBX1       | -1.7 | 1.9E-11 | 5.84E-10 | 11.051 | 0.748 | 9.953  | 11.609 | 17.534 | 1.021 | 16.455 | 18.406 |
| ENSG00000246465 |            | -1.7 | 4.3E-08 | 5.5E-07  | 9.237  | 0.412 | 8.828  | 9.603  | 14.371 | 1.025 | 13.296 | 15.766 |
| ENSG00000164949 | GEM        | -1.7 | 1.5E-07 | 1.7E-06  | 9.140  | 0.710 | 8.154  | 9.798  | 13.755 | 0.525 | 13.130 | 14.415 |
| ENSG00000120370 | GORAB      | -1.7 | 1.3E-08 | 1.8E-07  | 8.132  | 0.361 | 7.794  | 8.610  | 12.897 | 0.307 | 12.532 | 13.150 |
| ENSG00000249859 | PVT1       | -1.7 | 1.8E-09 | 3.2E-08  | 7.760  | 0.337 | 7.399  | 8.114  | 12.792 | 0.489 | 12.073 | 13.099 |
| ENSG00000044524 | EPHA3      | -1.7 | 1.8E-07 | 1.9E-06  | 7.685  | 0.794 | 6.691  | 8.629  | 11.856 | 0.323 | 11.462 | 12.120 |
| ENSG00000176887 | SOX11      | -1.7 | 2.3E-09 | 4E-08    | 7.310  | 0.723 | 6.312  | 7.958  | 11.318 | 0.445 | 10.652 | 11.566 |
| ENSG00000179981 | TSHZ1      | -1.7 | 1.5E-09 | 2.9E-08  | 6.988  | 0.796 | 6.124  | 7.785  | 11.199 | 0.078 | 11.135 | 11.313 |
| ENSG00000261557 |            | -1.7 | 2.1E-04 | 0.00092  | 5.368  | 1.099 | 3.761  | 6.247  | 8.154  | 1.353 | 7.053  | 10.129 |
| ENSG00000277383 |            | -1.7 | 1.9E-03 | 0.00616  | 5.315  | 1.083 | 4.425  | 6.689  | 8.415  | 0.413 | 8.021  | 8.772  |
| ENSG00000239405 | TMED10P2   | -1.7 | 1.8E-03 | 0.00595  | 4.772  | 1.198 | 3.597  | 5.852  | 7.551  | 0.586 | 6.673  | 7.890  |
| ENSG00000164708 | PGAM2      | -1.7 | 1.1E-03 | 0.00378  | 4.034  | 0.805 | 3.467  | 5.183  | 6.038  | 0.743 | 5.399  | 6.782  |
| ENSG00000164743 | C8orf48    | -1.7 | 5.7E-05 | 0.0003   | 3.994  | 0.636 | 3.286  | 4.742  | 6.369  | 0.565 | 5.544  | 6.735  |
| ENSG00000145536 | ADAMTS16   | -1.7 | 1.3E-07 | 1.5E-06  | 3.861  | 0.330 | 3.487  | 4.291  | 6.448  | 0.528 | 6.095  | 7.234  |
| ENSG00000266983 |            | -1.7 | 4.1E-03 | 0.01181  | 3.703  | 1.281 | 2.707  | 5.580  | 6.794  | 1.382 | 5.542  | 7.989  |
| ENSG00000070731 | ST6GALNAC2 | -1.7 | 4.8E-06 | 3.5E-05  | 3.366  | 0.597 | 2.571  | 4.010  | 5.640  | 0.444 | 4.988  | 5.922  |
| ENSG00000143995 | MEIS1      | -1.7 | 2.0E-08 | 2.8E-07  | 3.230  | 0.301 | 2.935  | 3.589  | 5.140  | 0.484 | 4.446  | 5.472  |
| ENSG00000225792 |            | -1.7 | 2.0E-03 | 0.00643  | 3.164  | 0.763 | 2.496  | 4.237  | 4.854  | 0.450 | 4.522  | 5.475  |
| ENSG00000258357 |            | -1.7 | 5.7E-03 | 0.01558  | 2.916  | 0.281 | 2.695  | 3.326  | 4.007  | 1.230 | 2.966  | 5.365  |
| ENSG00000203814 | HIST2H2BF  | -1.7 | 9.8E-05 | 0.00048  | 2.451  | 0.524 | 1.820  | 2.964  | 4.127  | 0.244 | 3.794  | 4.309  |
| ENSG00000230699 |            | -1.7 | 1.9E-03 | 0.00618  | 2.425  | 0.677 | 1.433  | 2.946  | 4.268  | 1.192 | 3.097  | 5.295  |
| ENSG00000260103 |            | -1.7 | 1.3E-04 | 0.00061  | 2.401  | 0.558 | 1.819  | 3.160  | 3.670  | 0.718 | 3.064  | 4.470  |
| ENSG00000217648 |            | -1.7 | 2.3E-03 | 0.00737  | 2.380  | 0.659 | 1.642  | 3.163  | 3.782  | 0.639 | 3.435  | 4.738  |
| ENSG00000140527 | WDR93      | -1.7 | 1.8E-02 | 0.0416   | 0.481  | 0.186 | 0.345  | 0.753  | 0.812  | 0.111 | 0.673  | 0.902  |
| ENSG00000196890 | HIST3H2BB  | -1.7 | 2.5E-05 | 0.00015  | 2.316  | 0.201 | 2.095  | 2.528  | 3.797  | 0.115 | 3.677  | 3.954  |
| ENSG00000232906 |            | -1.7 | 2.1E-03 | 0.00681  | 2.242  | 0.761 | 1.629  | 3.347  | 3.743  | 0.663 | 3.108  | 4.676  |
| ENSG00000229127 |            | -1.7 | 2.4E-03 | 0.00747  | 2.242  | 0.457 | 1.621  | 2.691  | 3.911  | 1.129 | 2.635  | 4.861  |
| ENSG00000138670 | RASGEF1B   | -1.7 | 1.9E-08 | 2.6E-07  | 2.240  | 0.065 | 2.146  | 2.295  | 3.433  | 0.247 | 3.130  | 3.635  |
| ENSG00000107562 | CXCL12     | -1.7 | 5.4E-08 | 6.7E-07  | 2.229  | 0.171 | 1.988  | 2.369  | 3.656  | 0.137 | 3.544  | 3.826  |
| ENSG00000279865 |            | -1.7 | 2.3E-04 | 0.00099  | 2.223  | 0.441 | 1.834  | 2.851  | 3.425  | 0.148 | 3.306  | 3.612  |
| ENSG00000263745 |            | -1.7 | 1.2E-05 | 7.9E-05  | 2.215  | 0.232 | 1.946  | 2.419  | 3.525  | 0.425 | 2.895  | 3.781  |
| ENSG00000225420 |            | -1.7 | 4.3E-03 | 0.01221  | 2.157  | 0.660 | 1.604  | 2.948  | 3.399  | 0.630 | 3.014  | 4.330  |
| ENSG00000169554 | ZEB2       | -1.7 | 1.6E-08 | 2.3E-07  | 1.877  | 0.117 | 1.757  | 2.023  | 3.053  | 0.268 | 2.806  | 3.284  |

|                 |           |      |         |          |        |        |        |        |        |        |        |         |
|-----------------|-----------|------|---------|----------|--------|--------|--------|--------|--------|--------|--------|---------|
| ENSG00000123700 | KCNJ2     | -1.7 | 6.1E-06 | 4.3E-05  | 1.587  | 0.120  | 1.410  | 1.669  | 2.590  | 0.342  | 2.078  | 2.775   |
| ENSG00000261136 |           | -1.7 | 2.8E-04 | 0.00118  | 1.531  | 0.384  | 1.032  | 1.950  | 2.561  | 0.103  | 2.430  | 2.681   |
| ENSG00000118407 | FILIP1    | -1.7 | 3.3E-06 | 2.5E-05  | 1.386  | 0.133  | 1.254  | 1.512  | 2.052  | 0.043  | 2.024  | 2.115   |
| ENSG00000139209 | SLC38A4   | -1.7 | 2.0E-04 | 0.00089  | 1.240  | 0.127  | 1.099  | 1.404  | 2.114  | 0.275  | 1.819  | 2.348   |
| ENSG00000186056 | MATN1-AS1 | -1.7 | 2.7E-04 | 0.00117  | 1.192  | 0.195  | 0.985  | 1.432  | 1.989  | 0.358  | 1.679  | 2.300   |
| ENSG00000108932 | SLC16A6   | -1.7 | 1.7E-04 | 0.0008   | 1.174  | 0.240  | 0.833  | 1.390  | 1.784  | 0.086  | 1.665  | 1.846   |
| ENSG00000234996 |           | -1.7 | 4.8E-03 | 0.01354  | 1.145  | 0.392  | 0.604  | 1.491  | 2.025  | 0.440  | 1.624  | 2.406   |
| ENSG00000143110 | C1orf162  | -1.7 | 1.4E-03 | 0.00491  | 1.126  | 0.265  | 0.885  | 1.360  | 1.810  | 0.265  | 1.512  | 2.156   |
| ENSG00000154736 | ADAMTS5   | -1.7 | 1.1E-06 | 9.5E-06  | 1.019  | 0.060  | 0.955  | 1.099  | 1.601  | 0.090  | 1.509  | 1.724   |
| ENSG00000102174 | PHEX      | -1.7 | 7.2E-06 | 4.9E-05  | 1.011  | 0.108  | 0.888  | 1.148  | 1.616  | 0.100  | 1.501  | 1.699   |
| ENSG00000154479 | CCDC173   | -1.7 | 6.4E-03 | 0.01716  | 0.989  | 0.340  | 0.563  | 1.393  | 1.459  | 0.220  | 1.224  | 1.756   |
| ENSG00000156453 | PCDH1     | -1.7 | 4.8E-04 | 0.00189  | 0.935  | 0.169  | 0.826  | 1.187  | 1.403  | 0.136  | 1.297  | 1.582   |
| ENSG00000115896 | PLCL1     | -1.7 | 1.1E-04 | 0.00055  | 0.928  | 0.115  | 0.805  | 1.070  | 1.442  | 0.277  | 1.117  | 1.672   |
| ENSG00000230873 | STMND1    | -1.7 | 4.0E-03 | 0.01163  | 0.923  | 0.304  | 0.709  | 1.375  | 1.408  | 0.232  | 1.218  | 1.690   |
| ENSG00000170961 | HAS2      | -1.7 | 1.1E-03 | 0.00403  | 0.786  | 0.207  | 0.595  | 1.060  | 1.206  | 0.205  | 1.066  | 1.500   |
| ENSG00000087589 | CASS4     | -1.7 | 1.6E-03 | 0.00525  | 0.742  | 0.235  | 0.434  | 0.983  | 1.202  | 0.152  | 1.070  | 1.334   |
| ENSG00000249637 |           | -1.7 | 1.5E-02 | 0.03563  | 3.485  | 0.755  | 2.790  | 4.255  | 5.154  | 1.537  | 4.068  | 7.330   |
| ENSG00000214198 | TTC41P    | -1.7 | 3.5E-04 | 0.00146  | 0.658  | 0.035  | 0.613  | 0.695  | 0.955  | 0.204  | 0.835  | 1.258   |
| ENSG00000253305 | PCDHGB6   | -1.7 | 5.5E-04 | 0.00215  | 0.636  | 0.137  | 0.505  | 0.754  | 1.161  | 0.237  | 0.866  | 1.353   |
| ENSG00000284526 |           | -1.7 | 3.9E-03 | 0.01124  | 0.545  | 0.142  | 0.389  | 0.701  | 0.916  | 0.057  | 0.861  | 0.996   |
| ENSG00000136040 | PLXNC1    | -1.7 | 5.1E-03 | 0.01426  | 0.535  | 0.077  | 0.429  | 0.601  | 0.903  | 0.118  | 0.763  | 1.000   |
| ENSG00000113389 | NPR3      | -1.7 | 2.6E-03 | 0.00823  | 0.507  | 0.040  | 0.466  | 0.562  | 0.733  | 0.223  | 0.604  | 1.067   |
| ENSG00000248441 | LINC01197 | -1.7 | 1.3E-03 | 0.00445  | 0.466  | 0.080  | 0.397  | 0.579  | 0.695  | 0.187  | 0.570  | 0.967   |
| ENSG00000164309 | CMYA5     | -1.7 | 4.8E-04 | 0.00191  | 0.421  | 0.094  | 0.335  | 0.545  | 0.663  | 0.025  | 0.641  | 0.687   |
| ENSG00000169896 | ITGAM     | -1.7 | 5.3E-03 | 0.01474  | 0.390  | 0.091  | 0.302  | 0.490  | 0.573  | 0.198  | 0.422  | 0.838   |
| ENSG00000134207 | SYT6      | -1.7 | 6.2E-03 | 0.01679  | 0.291  | 0.062  | 0.240  | 0.370  | 0.452  | 0.089  | 0.375  | 0.536   |
| ENSG00000133169 | BEX1      | -1.8 | 3.2E-02 | 0.06562  | 4.760  | 4.002  | 1.820  | 10.661 | 7.382  | 0.596  | 6.893  | 8.104   |
| ENSG00000138778 | CENPE     | -1.8 | 8.0E-02 | 0.14064  | 12.317 | 4.921  | 8.096  | 17.467 | 24.546 | 10.483 | 11.527 | 33.043  |
| ENSG00000236824 | BCYRN1    | -1.8 | 1.0E-04 | 0.0005   | 55.441 | 10.695 | 44.901 | 68.215 | 92.569 | 20.031 | 63.806 | 106.253 |
| ENSG00000228314 | CYP4F29P  | -1.8 | 1.1E-02 | 0.02779  | 1.166  | 0.504  | 0.773  | 1.884  | 2.088  | 0.202  | 1.967  | 2.391   |
| ENSG00000155090 | KLF10     | -1.8 | 1.2E-14 | 1.19E-12 | 47.086 | 1.911  | 44.900 | 49.534 | 79.005 | 0.317  | 78.733 | 79.463  |
| ENSG00000140450 | ARRDC4    | -1.8 | 9.5E-12 | 3.29E-10 | 40.418 | 2.873  | 36.609 | 42.881 | 67.499 | 5.755  | 62.416 | 72.482  |
| ENSG00000158373 | HIST1H2BD | -1.8 | 1.2E-08 | 1.7E-07  | 22.507 | 2.464  | 18.978 | 24.465 | 37.180 | 2.754  | 33.364 | 39.198  |
| ENSG00000180573 | HIST1H2AC | -1.8 | 3.5E-10 | 7.8E-09  | 20.719 | 0.761  | 19.833 | 21.671 | 34.083 | 0.698  | 33.100 | 34.750  |
| ENSG00000169116 | PARM1     | -1.8 | 2.6E-12 | 1.12E-10 | 17.911 | 1.354  | 16.275 | 19.241 | 30.164 | 1.155  | 29.411 | 31.847  |
| ENSG00000168542 | COL3A1    | -1.8 | 1.6E-11 | 5.10E-10 | 9.920  | 0.447  | 9.651  | 10.586 | 16.231 | 0.762  | 15.647 | 17.251  |
| ENSG00000278238 |           | -1.8 | 6.5E-05 | 0.00034  | 8.095  | 1.717  | 6.401  | 10.446 | 13.647 | 0.936  | 12.715 | 14.947  |
| ENSG00000218069 | RSL24D1P1 | -1.8 | 1.3E-04 | 0.00063  | 6.459  | 0.953  | 5.748  | 7.815  | 10.736 | 0.979  | 10.032 | 12.108  |

|                 |           |      |         |          |        |       |        |        |        |       |        |        |
|-----------------|-----------|------|---------|----------|--------|-------|--------|--------|--------|-------|--------|--------|
| ENSG00000260077 |           | -1.8 | 1.5E-05 | 9.2E-05  | 6.234  | 0.267 | 5.944  | 6.553  | 10.712 | 1.122 | 9.743  | 11.791 |
| ENSG00000137573 | SULF1     | -1.8 | 2.8E-10 | 6.5E-09  | 5.862  | 0.272 | 5.552  | 6.160  | 10.015 | 0.154 | 9.788  | 10.111 |
| ENSG00000214243 |           | -1.8 | 5.9E-04 | 0.00228  | 4.695  | 0.554 | 4.009  | 5.273  | 7.600  | 0.529 | 6.849  | 7.971  |
| ENSG00000092421 | SEMA6A    | -1.8 | 2.4E-09 | 4.2E-08  | 4.444  | 0.549 | 3.646  | 4.827  | 7.440  | 0.221 | 7.325  | 7.772  |
| ENSG00000135116 | HRK       | -1.8 | 1.6E-08 | 2.3E-07  | 4.107  | 0.254 | 3.844  | 4.454  | 7.062  | 0.590 | 6.177  | 7.358  |
| ENSG00000234585 | CCT6P3    | -1.8 | 8.5E-09 | 1.3E-07  | 3.896  | 0.318 | 3.563  | 4.192  | 6.629  | 0.249 | 6.264  | 6.790  |
| ENSG00000128573 | FOXP2     | -1.8 | 2.1E-05 | 0.00012  | 3.361  | 0.314 | 2.891  | 3.537  | 5.641  | 0.128 | 5.495  | 5.749  |
| ENSG00000140465 | CYP1A1    | -1.8 | 1.6E-04 | 0.00073  | 2.342  | 0.329 | 1.995  | 2.675  | 3.482  | 0.965 | 2.926  | 4.920  |
| ENSG00000176046 | NUPR1     | -1.8 | 1.6E-07 | 1.8E-06  | 2.327  | 0.203 | 2.051  | 2.510  | 3.738  | 0.504 | 3.346  | 4.402  |
| ENSG00000237187 | NR2F1-AS1 | -1.8 | 3.5E-08 | 4.7E-07  | 2.265  | 0.321 | 1.813  | 2.500  | 3.683  | 0.097 | 3.561  | 3.761  |
| ENSG00000138639 | ARHGAP24  | -1.8 | 3.8E-07 | 3.8E-06  | 2.203  | 0.355 | 1.674  | 2.426  | 3.674  | 0.210 | 3.420  | 3.933  |
| ENSG00000178573 | MAF       | -1.8 | 9.1E-08 | 1.1E-06  | 1.984  | 0.243 | 1.623  | 2.130  | 3.162  | 0.052 | 3.092  | 3.202  |
| ENSG00000274290 | HIST1H2BE | -1.8 | 9.5E-04 | 0.00345  | 1.715  | 0.544 | 0.920  | 2.139  | 2.543  | 0.341 | 2.345  | 3.051  |
| ENSG00000102678 | FGF9      | -1.8 | 2.0E-05 | 0.00012  | 1.687  | 0.474 | 1.143  | 2.230  | 3.027  | 0.210 | 2.769  | 3.199  |
| ENSG00000152763 | WDR78     | -1.8 | 8.7E-05 | 0.00043  | 1.547  | 0.334 | 1.196  | 1.974  | 2.512  | 0.524 | 2.070  | 3.097  |
| ENSG00000243819 | RN7SL832P | -1.8 | 4.7E-04 | 0.00188  | 1.476  | 0.286 | 1.075  | 1.745  | 2.517  | 0.034 | 2.475  | 2.544  |
| ENSG00000109819 | PPARGC1A  | -1.8 | 7.1E-08 | 8.6E-07  | 1.372  | 0.096 | 1.232  | 1.451  | 2.343  | 0.156 | 2.162  | 2.543  |
| ENSG00000260774 |           | -1.8 | 6.2E-04 | 0.00238  | 1.287  | 0.151 | 1.116  | 1.478  | 1.912  | 0.381 | 1.341  | 2.104  |
| ENSG00000166793 | YPEL4     | -1.8 | 1.3E-05 | 8.3E-05  | 1.265  | 0.145 | 1.133  | 1.432  | 2.018  | 0.178 | 1.896  | 2.274  |
| ENSG00000182752 | PAPPA     | -1.8 | 3.7E-07 | 3.6E-06  | 1.219  | 0.146 | 1.095  | 1.429  | 1.999  | 0.224 | 1.820  | 2.281  |
| ENSG00000273038 |           | -1.8 | 7.0E-03 | 0.01867  | 1.005  | 0.352 | 0.681  | 1.452  | 1.954  | 0.214 | 1.643  | 2.094  |
| ENSG00000247809 | NR2F2-AS1 | -1.8 | 3.0E-05 | 0.00017  | 0.836  | 0.094 | 0.700  | 0.909  | 1.268  | 0.099 | 1.184  | 1.381  |
| ENSG00000186479 | RGS7BP    | -1.8 | 2.7E-04 | 0.00117  | 0.808  | 0.128 | 0.711  | 0.995  | 1.365  | 0.218 | 1.040  | 1.507  |
| ENSG00000121075 | TBX4      | -1.8 | 5.4E-04 | 0.00212  | 0.727  | 0.104 | 0.662  | 0.882  | 1.225  | 0.071 | 1.128  | 1.297  |
| ENSG00000107105 | ELAVL2    | -1.8 | 1.2E-03 | 0.00425  | 0.701  | 0.254 | 0.536  | 1.079  | 1.177  | 0.179 | 0.908  | 1.273  |
| ENSG00000269974 |           | -1.8 | 1.3E-02 | 0.03153  | 3.998  | 1.049 | 2.925  | 5.311  | 6.511  | 1.477 | 5.441  | 8.572  |
| ENSG00000185736 | ADARB2    | -1.8 | 1.3E-04 | 0.00062  | 0.556  | 0.109 | 0.481  | 0.718  | 1.016  | 0.192 | 0.747  | 1.153  |
| ENSG00000231672 | DIRC3     | -1.8 | 1.1E-03 | 0.00381  | 0.496  | 0.121 | 0.361  | 0.634  | 0.818  | 0.187 | 0.587  | 1.044  |
| ENSG00000215018 | COL28A1   | -1.8 | 3.2E-04 | 0.00135  | 0.492  | 0.079 | 0.423  | 0.579  | 0.782  | 0.152 | 0.651  | 0.926  |
| ENSG00000150394 | CDH8      | -1.8 | 3.0E-05 | 0.00017  | 0.434  | 0.040 | 0.395  | 0.487  | 0.742  | 0.124 | 0.627  | 0.849  |
| ENSG00000175197 | DDIT3     | -1.9 | 2.9E-10 | 6.7E-09  | 39.272 | 2.848 | 35.276 | 41.777 | 67.965 | 4.580 | 65.225 | 74.818 |
| ENSG00000145632 | PLK2      | -1.9 | 2.7E-12 | 1.16E-10 | 17.036 | 0.919 | 16.494 | 18.407 | 30.219 | 1.628 | 28.366 | 31.587 |
| ENSG00000228409 | CCT6P1    | -1.9 | 5.5E-08 | 6.8E-07  | 13.533 | 1.717 | 11.346 | 15.539 | 24.681 | 1.192 | 24.010 | 26.462 |
| ENSG00000078018 | MAP2      | -1.9 | 2.7E-09 | 4.7E-08  | 7.288  | 0.606 | 6.802  | 8.174  | 13.503 | 1.531 | 12.013 | 14.824 |
| ENSG00000260727 | SLC7A5P1  | -1.9 | 1.8E-03 | 0.0058   | 4.243  | 1.205 | 3.075  | 5.847  | 7.775  | 1.808 | 5.096  | 9.068  |
| ENSG00000250519 |           | -1.9 | 4.2E-04 | 0.00171  | 3.414  | 0.440 | 2.827  | 3.877  | 6.125  | 0.780 | 5.121  | 7.024  |
| ENSG00000163009 | C2orf48   | -1.9 | 1.2E-05 | 7.7E-05  | 2.949  | 0.740 | 2.134  | 3.876  | 5.305  | 0.666 | 4.837  | 6.293  |
| ENSG00000274460 |           | -1.9 | 9.2E-05 | 0.00046  | 2.742  | 0.721 | 1.849  | 3.586  | 4.698  | 0.417 | 4.387  | 5.268  |

|                 |           |      |         |          |         |       |         |         |         |       |         |         |
|-----------------|-----------|------|---------|----------|---------|-------|---------|---------|---------|-------|---------|---------|
| ENSG00000276966 | HIST1H4E  | -1.9 | 3.1E-05 | 0.00018  | 2.662   | 0.548 | 2.221   | 3.456   | 4.849   | 0.367 | 4.331   | 5.196   |
| ENSG00000224596 | ZMIZ1-AS1 | -1.9 | 2.3E-02 | 0.04957  | 0.274   | 0.114 | 0.173   | 0.391   | 0.568   | 0.143 | 0.355   | 0.649   |
| ENSG00000225793 |           | -1.9 | 2.4E-04 | 0.00103  | 1.702   | 0.120 | 1.553   | 1.845   | 2.860   | 0.661 | 2.416   | 3.815   |
| ENSG00000164440 | TXLNB     | -1.9 | 2.7E-06 | 2.1E-05  | 1.670   | 0.391 | 1.334   | 2.082   | 2.894   | 0.240 | 2.706   | 3.245   |
| ENSG00000104783 | KCNN4     | -1.9 | 7.8E-06 | 5.3E-05  | 1.255   | 0.182 | 1.118   | 1.515   | 2.264   | 0.125 | 2.183   | 2.447   |
| ENSG00000261087 |           | -1.9 | 1.3E-03 | 0.00455  | 1.124   | 0.478 | 0.542   | 1.683   | 2.057   | 0.194 | 1.766   | 2.169   |
| ENSG00000188959 | C9orf152  | -1.9 | 7.9E-04 | 0.00295  | 0.658   | 0.140 | 0.471   | 0.780   | 1.054   | 0.092 | 0.974   | 1.147   |
| ENSG00000233030 |           | -1.9 | 3.0E-03 | 0.00903  | 0.520   | 0.265 | 0.266   | 0.894   | 0.998   | 0.184 | 0.810   | 1.156   |
| ENSG00000248596 |           | -1.9 | 1.9E-03 | 0.00628  | 0.424   | 0.176 | 0.259   | 0.659   | 0.719   | 0.043 | 0.683   | 0.765   |
| ENSG00000173406 | DAB1      | -1.9 | 1.1E-03 | 0.00402  | 0.298   | 0.089 | 0.187   | 0.371   | 0.496   | 0.125 | 0.423   | 0.682   |
| ENSG00000174844 | DNAH12    | -1.9 | 2.5E-04 | 0.00107  | 0.209   | 0.045 | 0.152   | 0.249   | 0.360   | 0.044 | 0.337   | 0.426   |
| ENSG00000026025 | VIM       | -2   | 3.5E-15 | 4.10E-13 | 183.403 | 5.370 | 178.925 | 191.207 | 340.579 | 7.338 | 330.942 | 346.298 |
| ENSG00000256589 | ENPP7P5   | -2   | 1.0E-01 | 0.17299  | 0.274   | 0.134 | 0.153   | 0.453   | 0.657   | 0.083 | 0.609   | 0.781   |
| ENSG00000188738 | FSIP2     | -2   | 2.1E-02 | 0.04644  | 0.114   | 0.048 | 0.046   | 0.156   | 0.272   | 0.117 | 0.140   | 0.370   |
| ENSG00000075223 | SEMA3C    | -2   | 1.4E-08 | 2.1E-07  | 13.655  | 1.164 | 12.610  | 14.906  | 26.051  | 1.381 | 24.473  | 27.209  |
| ENSG00000130222 | GADD45G   | -2   | 1.3E-06 | 1.1E-05  | 7.112   | 0.740 | 6.361   | 7.763   | 13.920  | 0.753 | 13.189  | 14.976  |
| ENSG00000123095 | BHLHE41   | -2   | 4.0E-11 | 1.2E-09  | 6.177   | 0.388 | 5.616   | 6.469   | 11.284  | 0.357 | 10.764  | 11.517  |
| ENSG00000010030 | ETV7      | -2   | 9.1E-07 | 8.1E-06  | 4.535   | 0.980 | 3.161   | 5.424   | 8.343   | 0.975 | 6.881   | 8.882   |
| ENSG00000159208 | CIART     | -2   | 3.0E-07 | 3.1E-06  | 3.284   | 0.469 | 2.625   | 3.693   | 5.806   | 0.827 | 5.148   | 6.866   |
| ENSG00000213363 | RPS3P6    | -2   | 1.2E-03 | 0.00407  | 3.097   | 0.484 | 2.619   | 3.769   | 5.995   | 0.842 | 4.744   | 6.577   |
| ENSG00000170214 | ADRA1B    | -2   | 1.9E-04 | 0.00085  | 2.581   | 0.753 | 1.810   | 3.261   | 4.749   | 0.841 | 3.615   | 5.649   |
| ENSG00000179046 | TRIML2    | -2   | 6.8E-06 | 4.7E-05  | 1.939   | 0.432 | 1.340   | 2.298   | 3.671   | 0.786 | 3.138   | 4.803   |
| ENSG00000255471 |           | -2   | 7.6E-04 | 0.00284  | 1.648   | 0.752 | 1.162   | 2.765   | 2.842   | 0.243 | 2.511   | 3.095   |
| ENSG00000283235 |           | -2   | 1.5E-03 | 0.00508  | 1.098   | 0.625 | 0.452   | 1.789   | 2.102   | 0.156 | 1.870   | 2.214   |
| ENSG00000139269 | INHBE     | -2   | 6.0E-04 | 0.00232  | 1.026   | 0.219 | 0.854   | 1.343   | 1.598   | 0.158 | 1.482   | 1.815   |
| ENSG00000108309 | RUNDC3A   | -2   | 7.7E-05 | 0.00039  | 0.794   | 0.285 | 0.593   | 1.212   | 1.455   | 0.321 | 1.281   | 1.936   |
| ENSG00000249790 |           | -2   | 7.2E-03 | 0.01906  | 0.478   | 0.118 | 0.319   | 0.583   | 0.960   | 0.355 | 0.598   | 1.448   |
| ENSG00000273419 |           | -2   | 3.5E-03 | 0.01028  | 0.464   | 0.104 | 0.339   | 0.561   | 0.844   | 0.333 | 0.663   | 1.343   |
| ENSG00000038295 | TLL1      | -2   | 1.3E-03 | 0.00455  | 0.310   | 0.026 | 0.285   | 0.334   | 0.662   | 0.176 | 0.449   | 0.806   |
| ENSG00000272398 | CD24      | -2.1 | 4.8E-02 | 0.09193  | 2.385   | 1.846 | 1.360   | 5.149   | 4.201   | 2.674 | 2.850   | 8.212   |
| ENSG00000099251 | HSD17B7P2 | -2.1 | 1.1E-09 | 2.1E-08  | 12.832  | 1.553 | 11.168  | 14.797  | 25.578  | 2.251 | 22.530  | 27.279  |
| ENSG00000273802 | HIST1H2BG | -2.1 | 1.2E-07 | 1.4E-06  | 4.204   | 0.484 | 3.745   | 4.873   | 8.276   | 0.556 | 7.660   | 9.011   |
| ENSG00000223638 | RFPL4A    | -2.1 | 1.8E-05 | 0.00011  | 3.489   | 0.605 | 2.899   | 4.195   | 6.796   | 1.466 | 5.742   | 8.967   |
| ENSG00000236993 | GAPDHP21  | -2.1 | 1.8E-05 | 0.00011  | 2.934   | 0.564 | 2.467   | 3.640   | 5.833   | 0.260 | 5.687   | 6.221   |
| ENSG00000224294 |           | -2.1 | 7.4E-06 | 5E-05    | 2.273   | 0.302 | 1.957   | 2.681   | 4.772   | 0.536 | 4.190   | 5.227   |
| ENSG00000229292 | RFPL4AL1  | -2.1 | 2.2E-04 | 0.00095  | 2.259   | 0.395 | 1.778   | 2.736   | 4.547   | 0.515 | 4.117   | 5.140   |
| ENSG00000242689 | CNTF      | -2.1 | 9.1E-06 | 6.1E-05  | 2.240   | 0.275 | 1.987   | 2.631   | 4.493   | 0.840 | 3.824   | 5.723   |
| ENSG00000151023 | ENKUR     | -2.1 | 2.2E-03 | 0.0069   | 0.373   | 0.146 | 0.188   | 0.535   | 0.664   | 0.074 | 0.553   | 0.705   |

|                 |           |      |         |          |        |       |        |        |         |        |         |         |
|-----------------|-----------|------|---------|----------|--------|-------|--------|--------|---------|--------|---------|---------|
| ENSG00000080573 | COL5A3    | -2.1 | 3.3E-04 | 0.00138  | 0.335  | 0.119 | 0.235  | 0.508  | 0.707   | 0.149  | 0.548   | 0.908   |
| ENSG00000165186 | PTCHD1    | -2.1 | 8.0E-05 | 0.0004   | 0.173  | 0.027 | 0.145  | 0.206  | 0.366   | 0.026  | 0.329   | 0.389   |
| ENSG00000210151 | MT-TS1    | -2.2 | 3.9E-03 | 0.01129  | 61.773 | 9.410 | 54.546 | 75.605 | 140.259 | 11.803 | 131.400 | 156.330 |
| ENSG00000196787 | HIST1H2AG | -2.2 | 1.7E-09 | 3E-08    | 4.897  | 0.497 | 4.232  | 5.393  | 10.018  | 0.371  | 9.495   | 10.281  |
| ENSG00000108924 | HLF       | -2.2 | 2.3E-08 | 3.2E-07  | 1.551  | 0.121 | 1.380  | 1.643  | 3.124   | 0.454  | 2.731   | 3.535   |
| ENSG00000186517 | ARHGAP30  | -2.2 | 4.3E-08 | 5.6E-07  | 1.525  | 0.301 | 1.087  | 1.724  | 3.154   | 0.121  | 3.009   | 3.306   |
| ENSG00000188580 | NKAIN2    | -2.2 | 1.5E-04 | 0.00068  | 0.624  | 0.237 | 0.408  | 0.944  | 1.130   | 0.240  | 0.950   | 1.457   |
| ENSG00000122641 | INHBA     | -2.2 | 2.4E-04 | 0.00104  | 0.290  | 0.095 | 0.167  | 0.369  | 0.606   | 0.181  | 0.359   | 0.795   |
| ENSG00000100867 | DHRS2     | -2.3 | 5.7E-10 | 1.2E-08  | 9.467  | 0.470 | 9.000  | 9.936  | 20.462  | 0.474  | 19.874  | 20.847  |
| ENSG00000134363 | FST       | -2.3 | 3.1E-06 | 2.4E-05  | 1.606  | 0.437 | 1.201  | 2.167  | 3.594   | 0.119  | 3.416   | 3.654   |
| ENSG00000181016 | LSMEM1    | -2.3 | 1.1E-06 | 9.8E-06  | 1.466  | 0.289 | 1.182  | 1.802  | 3.286   | 0.395  | 2.732   | 3.570   |
| ENSG00000138347 | MYPN      | -2.3 | 6.6E-07 | 6.1E-06  | 0.567  | 0.149 | 0.434  | 0.780  | 1.320   | 0.098  | 1.201   | 1.401   |
| ENSG00000145087 | STXBP5L   | -2.3 | 2.1E-05 | 0.00012  | 0.341  | 0.132 | 0.249  | 0.536  | 0.690   | 0.142  | 0.604   | 0.900   |
| ENSG00000158486 | DNAH3     | -2.4 | 2.3E-07 | 2.4E-06  | 0.428  | 0.035 | 0.396  | 0.477  | 1.008   | 0.038  | 0.968   | 1.061   |
| ENSG00000265972 | TXNIP     | -2.5 | 1.1E-16 | 2.23E-14 | 79.628 | 4.790 | 74.361 | 84.802 | 181.912 | 3.734  | 176.321 | 184.098 |
| ENSG00000164746 | C7orf57   | -2.5 | 2.2E-04 | 0.00097  | 0.703  | 0.166 | 0.479  | 0.875  | 1.381   | 0.635  | 0.842   | 2.071   |
| ENSG00000056487 | PHF21B    | -2.5 | 1.1E-04 | 0.00054  | 0.437  | 0.198 | 0.271  | 0.723  | 0.954   | 0.367  | 0.638   | 1.311   |
| ENSG00000143469 | SYT14     | -2.5 | 3.8E-09 | 6.3E-08  | 0.412  | 0.065 | 0.339  | 0.498  | 0.978   | 0.115  | 0.857   | 1.077   |
| ENSG00000187775 | DNAH17    | -2.6 | 5.2E-13 | 2.84E-11 | 1.652  | 0.179 | 1.502  | 1.905  | 4.031   | 0.242  | 3.823   | 4.267   |
| ENSG00000111087 | GLI1      | -2.6 | 2.9E-09 | 5.1E-08  | 1.225  | 0.069 | 1.131  | 1.296  | 2.992   | 0.283  | 2.770   | 3.363   |
| ENSG00000255389 |           | -2.6 | 1.3E-05 | 8.1E-05  | 0.807  | 0.401 | 0.515  | 1.392  | 2.106   | 0.316  | 1.752   | 2.372   |
| ENSG00000164484 | TMEM200A  | -2.6 | 6.7E-04 | 0.00256  | 0.167  | 0.022 | 0.152  | 0.200  | 0.377   | 0.199  | 0.234   | 0.656   |
| ENSG00000234424 |           | -3.1 | 1.7E-07 | 1.9E-06  | 1.365  | 0.253 | 1.016  | 1.601  | 3.988   | 0.570  | 3.173   | 4.383   |
| ENSG00000132639 | SNAP25    | -3.1 | 2.4E-04 | 0.00105  | 1.159  | 0.961 | 0.593  | 2.596  | 3.131   | 0.323  | 2.851   | 3.416   |
| ENSG00000268756 |           | -3.2 | 1.2E-08 | 1.8E-07  | 5.762  | 0.389 | 5.412  | 6.300  | 17.527  | 2.380  | 16.067  | 21.045  |
| ENSG00000277862 | PRAMEF34P | -3.2 | 1.9E-10 | 4.7E-09  | 3.674  | 0.448 | 3.217  | 4.128  | 10.430  | 1.865  | 8.820   | 12.231  |
| ENSG00000229978 | PRAMEF36P | -3.2 | 3.2E-10 | 7.2E-09  | 3.620  | 0.635 | 2.933  | 4.290  | 10.308  | 1.690  | 8.845   | 11.846  |
| ENSG00000167995 | BEST1     | -3.2 | 3.4E-11 | 1E-09    | 0.635  | 0.098 | 0.511  | 0.750  | 1.941   | 0.162  | 1.697   | 2.028   |
| ENSG00000126368 | NR1D1     | -3.4 | 1.1E-13 | 7.24E-12 | 8.252  | 0.328 | 7.789  | 8.565  | 26.913  | 3.452  | 24.345  | 31.647  |
| ENSG00000113369 | ARRDC3    | -3.5 | 1.7E-16 | 3.40E-14 | 8.254  | 0.579 | 7.854  | 9.114  | 26.063  | 0.710  | 25.022  | 26.514  |
| ENSG00000144010 | TRIM43B   | -3.5 | 3.5E-12 | 1.46E-10 | 6.776  | 1.183 | 5.882  | 8.511  | 21.859  | 2.419  | 20.404  | 25.446  |
| ENSG00000144015 | TRIM43    | -3.6 | 1.2E-12 | 6.09E-11 | 7.297  | 1.071 | 5.925  | 8.382  | 23.274  | 2.683  | 21.373  | 27.064  |
| ENSG00000204510 | PRAMEF7   | -4   | 2.5E-08 | 3.5E-07  | 0.856  | 0.144 | 0.704  | 1.035  | 2.864   | 0.628  | 2.355   | 3.643   |
| ENSG00000249620 |           | -4.4 | 3.8E-09 | 6.4E-08  | 8.026  | 2.114 | 5.659  | 10.246 | 33.501  | 8.153  | 27.310  | 44.493  |
| ENSG00000183571 | PGPEP1L   | -4.4 | 6.0E-04 | 0.00232  | 0.150  | 0.050 | 0.094  | 0.193  | 0.588   | 0.421  | 0.294   | 1.186   |
| ENSG00000250386 |           | -4.5 | 5.1E-09 | 8.2E-08  | 15.004 | 3.352 | 10.765 | 18.646 | 59.215  | 18.192 | 44.468  | 81.805  |
| ENSG00000182330 | PRAMEF8   | -4.6 | 7.2E-08 | 8.7E-07  | 0.664  | 0.138 | 0.523  | 0.852  | 2.533   | 0.800  | 2.100   | 3.730   |
| ENSG00000268799 |           | -4.7 | 1.5E-09 | 2.8E-08  | 11.016 | 0.790 | 10.235 | 12.026 | 48.173  | 13.156 | 36.991  | 62.445  |



|                 |          |      |         |          |        |       |        |        |         |        |         |         |
|-----------------|----------|------|---------|----------|--------|-------|--------|--------|---------|--------|---------|---------|
| ENSG00000116726 | PRAMEF12 | -4.8 | 1.3E-09 | 2.5E-08  | 0.939  | 0.118 | 0.872  | 1.115  | 3.898   | 0.647  | 3.394   | 4.749   |
| ENSG00000237693 | IRGM     | -4.8 | 7.2E-07 | 6.6E-06  | 0.413  | 0.186 | 0.270  | 0.686  | 2.015   | 0.210  | 1.701   | 2.144   |
| ENSG00000144188 | TRIM43CP | -4.9 | 2.3E-12 | 1.02E-10 | 2.346  | 0.146 | 2.152  | 2.499  | 10.501  | 0.691  | 9.906   | 11.181  |
| ENSG00000283740 |          | -5   | 4.7E-14 | 3.63E-12 | 23.906 | 0.540 | 23.236 | 24.356 | 106.075 | 18.013 | 90.894  | 126.328 |
| ENSG00000171951 | SCG2     | -5.1 | 4.3E-08 | 5.6E-07  | 0.499  | 0.055 | 0.451  | 0.573  | 2.402   | 0.142  | 2.250   | 2.523   |
| ENSG00000269466 |          | -5.2 | 8.8E-12 | 3.10E-10 | 45.028 | 9.711 | 34.710 | 57.162 | 218.205 | 24.844 | 197.802 | 248.265 |
| ENSG00000204531 | POU5F1   | -5.2 | 1.1E-01 | 0.1814   | 0.132  | 0.076 | 0.027  | 0.205  | 0.701   | 1.113  | 0.000   | 2.362   |
| ENSG00000284438 |          | -5.2 | 3.0E-10 | 6.8E-09  | 3.211  | 0.927 | 2.440  | 4.459  | 15.264  | 1.291  | 14.146  | 16.398  |
| ENSG00000189325 | C6orf222 | -5.2 | 4.4E-08 | 5.7E-07  | 0.259  | 0.133 | 0.123  | 0.375  | 1.310   | 0.138  | 1.196   | 1.472   |
| ENSG00000168930 | TRIM49   | -5.3 | 3.6E-14 | 2.89E-12 | 4.679  | 0.967 | 3.462  | 5.613  | 22.602  | 3.013  | 20.010  | 25.625  |
| ENSG00000204449 | TRIM49C  | -5.3 | 7.2E-15 | 7.52E-13 | 2.854  | 0.128 | 2.692  | 3.002  | 13.557  | 1.737  | 12.121  | 15.625  |
| ENSG00000150244 | TRIM48   | -5.4 | 1.6E-10 | 3.9E-09  | 1.434  | 0.305 | 1.185  | 1.827  | 6.710   | 1.426  | 5.612   | 8.606   |
| ENSG00000250782 |          | -5.7 | 3.6E-14 | 2.9E-12  | 13.526 | 2.439 | 9.962  | 15.471 | 69.314  | 12.385 | 58.686  | 81.978  |
| ENSG00000283776 |          | -5.7 | 1.8E-13 | 1.1E-11  | 10.874 | 2.888 | 8.237  | 14.978 | 55.437  | 9.323  | 48.525  | 68.250  |
| ENSG00000180532 | ZSCAN4   | -5.7 | 9.3E-12 | 3.3E-10  | 2.984  | 0.545 | 2.587  | 3.787  | 14.940  | 2.600  | 12.698  | 17.463  |
| ENSG00000284306 |          | -5.7 | 6.2E-09 | 9.8E-08  | 1.802  | 0.717 | 0.980  | 2.728  | 9.227   | 2.293  | 7.342   | 11.994  |
| ENSG00000284546 |          | -5.7 | 9.9E-08 | 1.2E-06  | 1.137  | 0.390 | 0.804  | 1.688  | 6.185   | 1.287  | 5.214   | 7.930   |
| ENSG00000235268 | KDM4E    | -5.7 | 9.0E-12 | 3.2E-10  | 0.845  | 0.195 | 0.605  | 1.059  | 4.543   | 0.309  | 4.095   | 4.802   |
| ENSG00000204455 | TRIM51BP | -6.1 | 5.5E-12 | 2.1E-10  | 2.234  | 0.553 | 1.749  | 2.930  | 12.098  | 2.392  | 10.301  | 15.353  |
| ENSG00000157765 | SLC34A2  | -6.1 | 4.6E-11 | 1.3E-09  | 0.489  | 0.148 | 0.335  | 0.632  | 2.582   | 0.551  | 2.139   | 3.276   |
| ENSG00000255855 | KDM4F    | -6.2 | 2.5E-10 | 5.9E-09  | 0.850  | 0.325 | 0.574  | 1.292  | 4.648   | 0.841  | 4.078   | 5.859   |
| ENSG00000236175 | SSU72P6  | -6.3 | 5.0E-10 | 1.1E-08  | 1.742  | 0.309 | 1.476  | 2.135  | 10.032  | 0.459  | 9.670   | 10.626  |
| ENSG00000283873 |          | -6.5 | 7.1E-11 | 1.9E-09  | 2.276  | 0.517 | 1.645  | 2.757  | 13.044  | 1.494  | 11.760  | 14.556  |
| ENSG00000237706 | TRIM51EP | -6.5 | 6.7E-12 | 2.4E-10  | 1.845  | 0.540 | 1.331  | 2.526  | 10.516  | 2.211  | 8.919   | 13.608  |
| ENSG00000236941 |          | -6.8 | 1.3E-09 | 2.5E-08  | 0.929  | 0.459 | 0.573  | 1.602  | 5.833   | 1.162  | 5.162   | 7.565   |
| ENSG00000249156 |          | -6.9 | 1.1E-11 | 3.7E-10  | 8.935  | 0.735 | 8.384  | 9.973  | 56.141  | 10.221 | 47.843  | 68.797  |
| ENSG00000254764 | TRIM53CP | -6.9 | 4.6E-10 | 9.9E-09  | 0.965  | 0.298 | 0.731  | 1.395  | 6.115   | 1.497  | 4.438   | 8.083   |
| ENSG00000284018 |          | -7   | 1.3E-08 | 1.9E-07  | 1.326  | 0.394 | 0.948  | 1.868  | 8.278   | 2.652  | 6.000   | 10.972  |
| ENSG00000182053 | TRIM49B  | -7   | 3.1E-11 | 9.3E-10  | 0.932  | 0.229 | 0.630  | 1.150  | 5.631   | 1.486  | 4.577   | 7.729   |
| ENSG00000225581 | TRIM53AP | -7.2 | 1.9E-11 | 5.8E-10  | 1.418  | 0.241 | 1.069  | 1.600  | 8.813   | 2.795  | 6.613   | 12.440  |
| ENSG00000223417 | TRIM49D1 | -7.3 | 6.2E-15 | 6.6E-13  | 1.726  | 0.242 | 1.538  | 2.060  | 11.203  | 1.769  | 9.744   | 13.326  |
| ENSG00000233802 | TRIM49D2 | -7.4 | 5.0E-15 | 5.4E-13  | 2.227  | 0.197 | 2.016  | 2.473  | 14.759  | 2.347  | 12.844  | 17.639  |
| ENSG00000166013 | TRIM53BP | -7.7 | 8.3E-12 | 2.9E-10  | 0.993  | 0.259 | 0.709  | 1.328  | 6.755   | 1.583  | 5.589   | 8.940   |
| ENSG00000251258 | RFPL4B   | -8.3 | 4.9E-09 | 8.0E-08  | 0.559  | 0.421 | 0.083  | 0.938  | 4.084   | 0.765  | 3.443   | 4.960   |
| ENSG00000189253 | TRIM64B  | -8.5 | 5.6E-12 | 2.1E-10  | 0.576  | 0.208 | 0.427  | 0.869  | 4.465   | 0.582  | 4.020   | 5.243   |
| ENSG00000257951 |          | -8.7 | 3.3E-12 | 1.4E-10  | 2.347  | 0.911 | 1.389  | 3.534  | 18.124  | 4.011  | 15.793  | 24.130  |
| ENSG00000183813 | CCR4     | -8.8 | 3.0E-08 | 4.1E-07  | 0.120  | 0.025 | 0.099  | 0.151  | 1.017   | 0.035  | 0.964   | 1.040   |
| ENSG00000204450 | TRIM64   | -9.8 | 1.5E-08 | 2.1E-07  | 0.179  | 0.105 | 0.061  | 0.311  | 1.670   | 0.563  | 1.201   | 2.325   |

ENSG00000256779

-9.9 1.5E-10 3.8E-09 0.484 0.207 0.356 0.792 4.667 0.605 3.902 5.382

**downregulated 759**

ENSG00000238083  
ENSG00000186479  
ENSG00000061455  
ENSG00000250682  
ENSG00000167074  
ENSG00000124713  
ENSG00000279873  
ENSG00000267767  
ENSG00000145675  
ENSG00000263412  
ENSG00000250546  
ENSG00000120696  
ENSG00000259660  
ENSG00000226383  
ENSG00000187650  
ENSG00000179935  
ENSG00000141314  
ENSG00000102032  
ENSG00000198879  
ENSG00000206561  
ENSG00000230069  
ENSG00000164938  
ENSG00000268575  
ENSG00000272328  
ENSG00000260941  
ENSG00000196668  
ENSG00000127903  
ENSG00000261578  
ENSG00000275294  
ENSG00000143110  
ENSG00000214783  
ENSG00000186973  
ENSG00000125398  
ENSG00000232260  
ENSG00000002587  
ENSG00000196724  
ENSG00000270558

**downregulated 620**

ENSG00000002587  
ENSG00000002745  
ENSG00000008300  
ENSG00000010030  
ENSG00000033122  
ENSG00000044524  
ENSG00000049130  
ENSG00000049246  
ENSG00000050628  
ENSG00000054598  
ENSG00000056487  
ENSG00000061455  
ENSG00000070731  
ENSG00000075223  
ENSG00000077092  
ENSG00000077522  
ENSG00000077684  
ENSG00000078018  
ENSG00000079102  
ENSG00000080573  
ENSG00000084453  
ENSG00000087085  
ENSG00000087589  
ENSG00000092421  
ENSG00000096654  
ENSG00000099250  
ENSG00000102678  
ENSG00000104081  
ENSG00000105327  
ENSG00000106483  
ENSG00000106571  
ENSG00000106804  
ENSG00000107105  
ENSG00000107562  
ENSG00000108309  
ENSG00000109819  
ENSG00000113369

**downregulated in 759 & 620**

ENSG00000002587  
ENSG00000002745  
ENSG00000008300  
ENSG00000010030  
ENSG00000033122  
ENSG00000044524  
ENSG00000049130  
ENSG00000049246  
ENSG00000050628  
ENSG00000054598  
ENSG00000056487  
ENSG00000061455  
ENSG00000070731  
ENSG00000075223  
ENSG00000077092  
ENSG00000077522  
ENSG00000077684  
ENSG00000078018  
ENSG00000079102  
ENSG00000080573  
ENSG00000084453  
ENSG00000087085  
ENSG00000087589  
ENSG00000092421  
ENSG00000096654  
ENSG00000099250  
ENSG00000102678  
ENSG00000104081  
ENSG00000105327  
ENSG00000106483  
ENSG00000106571  
ENSG00000106804  
ENSG00000107105  
ENSG00000107562  
ENSG00000108309  
ENSG00000109819  
ENSG00000113369

**All C19MC targets enser C19MC targets & downregulated in both expts**

ENSG00000000003  
ENSG00000000938  
ENSG00000000971  
ENSG00000001036  
ENSG00000001167  
ENSG00000001460  
ENSG00000001461  
ENSG00000001561  
ENSG00000001617  
ENSG00000001626  
ENSG00000001629  
ENSG00000001630  
ENSG00000001631  
ENSG00000002016  
ENSG00000002586  
ENSG00000002587  
ENSG00000002745  
ENSG00000002746  
ENSG00000002834  
ENSG00000002919  
ENSG00000003056  
ENSG00000003096  
ENSG00000003137  
ENSG00000003147  
ENSG00000003249  
ENSG00000003393  
ENSG00000003436  
ENSG00000003509  
ENSG00000003756  
ENSG00000003987  
ENSG00000004059  
ENSG00000004139  
ENSG00000004142  
ENSG00000004399  
ENSG00000004455  
ENSG00000004468  
ENSG00000004487

ENSG00000002587  
ENSG00000002745  
ENSG00000008300  
ENSG00000010030  
ENSG00000033122  
ENSG00000044524  
ENSG00000049130  
ENSG00000049246  
ENSG00000050628  
ENSG00000054598  
ENSG00000056487  
ENSG00000061455  
ENSG00000070731  
ENSG00000075223  
ENSG00000077092  
ENSG00000077522  
ENSG00000077684  
ENSG00000078018  
ENSG00000079102  
ENSG00000080573  
ENSG00000084453  
ENSG00000087085  
ENSG00000087589  
ENSG00000092421  
ENSG00000096654  
ENSG00000099250  
ENSG00000102678  
ENSG00000104081  
ENSG00000105327  
ENSG00000106483  
ENSG00000106571  
ENSG00000106804  
ENSG00000107105  
ENSG00000107562  
ENSG00000108309  
ENSG00000109819  
ENSG00000113369

|                 |                 |                 |                 |                 |
|-----------------|-----------------|-----------------|-----------------|-----------------|
| ENSG00000273373 | ENSG00000113389 | ENSG00000113389 | ENSG00000004660 | ENSG00000113389 |
| ENSG00000176681 | ENSG00000113580 | ENSG00000113580 | ENSG00000004700 | ENSG00000113580 |
| ENSG00000114251 | ENSG00000114861 | ENSG00000114861 | ENSG00000004776 | ENSG00000114861 |
| ENSG00000118263 | ENSG00000115461 | ENSG00000115461 | ENSG00000004779 | ENSG00000115461 |
| ENSG00000269994 | ENSG00000115896 | ENSG00000115896 | ENSG00000004799 | ENSG00000115896 |
| ENSG00000258357 | ENSG00000116106 | ENSG00000116106 | ENSG00000004809 | ENSG00000116106 |
| ENSG00000250492 | ENSG00000116117 | ENSG00000116117 | ENSG00000004838 | ENSG00000116117 |
| ENSG00000253366 | ENSG00000116574 | ENSG00000116574 | ENSG00000004846 | ENSG00000116574 |
| ENSG00000135679 | ENSG00000116717 | ENSG00000116717 | ENSG00000004864 | ENSG00000116717 |
| ENSG00000248027 | ENSG00000116726 | ENSG00000116726 | ENSG00000004866 | ENSG00000116726 |
| ENSG00000272195 | ENSG00000116991 | ENSG00000116991 | ENSG00000004897 | ENSG00000116991 |
| ENSG00000171522 | ENSG00000118922 | ENSG00000118922 | ENSG00000004948 | ENSG00000118922 |
| ENSG00000227268 | ENSG00000119866 | ENSG00000119866 | ENSG00000004961 | ENSG00000119866 |
| ENSG00000215630 | ENSG00000120370 | ENSG00000120370 | ENSG00000004975 | ENSG00000120370 |
| ENSG00000174898 | ENSG00000122641 | ENSG00000122641 | ENSG00000005007 | ENSG00000122641 |
| ENSG00000263465 | ENSG00000123094 | ENSG00000123094 | ENSG00000005020 | ENSG00000123094 |
| ENSG00000258441 | ENSG00000123095 | ENSG00000123095 | ENSG00000005022 | ENSG00000123095 |
| ENSG00000119866 | ENSG00000123700 | ENSG00000123700 | ENSG00000005073 | ENSG00000123700 |
| ENSG00000210151 | ENSG00000124766 | ENSG00000124766 | ENSG00000005100 | ENSG00000124766 |
| ENSG00000101470 | ENSG00000124813 | ENSG00000124813 | ENSG00000005102 | ENSG00000124813 |
| ENSG00000267546 | ENSG00000125398 | ENSG00000125398 | ENSG00000005108 | ENSG00000125398 |
| ENSG00000177565 | ENSG00000128052 | ENSG00000128052 | ENSG00000005175 | ENSG00000128052 |
| ENSG00000256591 | ENSG00000128573 | ENSG00000128573 | ENSG00000005194 | ENSG00000128573 |
| ENSG00000225420 | ENSG00000129757 | ENSG00000129757 | ENSG00000005206 | ENSG00000129757 |
| ENSG00000178662 | ENSG00000130518 | ENSG00000130518 | ENSG00000005249 | ENSG00000130518 |
| ENSG00000225793 | ENSG00000132639 | ENSG00000132639 | ENSG00000005302 | ENSG00000132639 |
| ENSG00000116991 | ENSG00000133639 | ENSG00000133639 | ENSG00000005339 | ENSG00000133639 |
| ENSG00000176593 | ENSG00000134294 | ENSG00000134294 | ENSG00000005379 | ENSG00000134294 |
| ENSG00000011021 | ENSG00000134532 | ENSG00000134532 | ENSG00000005436 | ENSG00000134532 |
| ENSG00000248643 | ENSG00000134986 | ENSG00000134986 | ENSG00000005469 | ENSG00000134986 |
| ENSG00000235100 | ENSG00000135116 | ENSG00000135116 | ENSG00000005483 | ENSG00000135116 |
| ENSG00000151612 | ENSG00000135547 | ENSG00000135547 | ENSG00000005486 | ENSG00000135547 |
| ENSG00000213976 | ENSG00000135679 | ENSG00000135679 | ENSG00000005513 | ENSG00000135679 |
| ENSG00000257511 | ENSG00000136040 | ENSG00000136040 | ENSG00000005801 | ENSG00000136040 |
| ENSG00000236028 | ENSG00000137573 | ENSG00000137573 | ENSG00000005810 | ENSG00000137573 |
| ENSG00000104081 | ENSG00000138347 | ENSG00000138347 | ENSG00000005812 | ENSG00000138347 |
| ENSG00000248774 | ENSG00000138639 | ENSG00000138639 | ENSG00000005844 | ENSG00000138639 |
| ENSG00000183346 | ENSG00000138670 | ENSG00000138670 | ENSG00000005882 | ENSG00000138670 |

|                 |                 |                 |                 |                 |
|-----------------|-----------------|-----------------|-----------------|-----------------|
| ENSG00000124788 | ENSG00000139209 | ENSG00000139209 | ENSG00000005884 | ENSG00000139209 |
| ENSG00000122641 | ENSG00000139269 | ENSG00000139269 | ENSG00000005889 | ENSG00000139269 |
| ENSG00000162599 | ENSG00000139364 | ENSG00000139364 | ENSG00000005893 | ENSG00000139364 |
| ENSG00000115841 | ENSG00000139946 | ENSG00000139946 | ENSG00000005981 | ENSG00000139946 |
| ENSG00000170153 | ENSG00000141431 | ENSG00000141431 | ENSG00000006007 | ENSG00000141431 |
| ENSG00000262251 | ENSG00000143469 | ENSG00000143469 | ENSG00000006062 | ENSG00000143469 |
| ENSG00000105516 | ENSG00000143995 | ENSG00000143995 | ENSG00000006116 | ENSG00000143995 |
| ENSG00000066279 | ENSG00000145087 | ENSG00000145087 | ENSG00000006283 | ENSG00000145087 |
| ENSG00000206120 | ENSG00000145536 | ENSG00000145536 | ENSG00000006327 | ENSG00000145536 |
| ENSG00000229292 | ENSG00000145632 | ENSG00000145632 | ENSG00000006377 | ENSG00000145632 |
| ENSG00000254165 | ENSG00000145687 | ENSG00000145687 | ENSG00000006432 | ENSG00000145687 |
| ENSG00000134138 | ENSG00000147606 | ENSG00000147606 | ENSG00000006451 | ENSG00000147606 |
| ENSG00000223891 | ENSG00000147852 | ENSG00000147852 | ENSG00000006453 | ENSG00000147852 |
| ENSG00000168743 | ENSG00000147862 | ENSG00000147862 | ENSG00000006459 | ENSG00000147862 |
| ENSG00000177606 | ENSG00000148541 | ENSG00000148541 | ENSG00000006468 | ENSG00000148541 |
| ENSG00000267506 | ENSG00000149212 | ENSG00000149212 | ENSG00000006530 | ENSG00000149212 |
| ENSG00000166415 | ENSG00000150244 | ENSG00000150244 | ENSG00000006534 | ENSG00000150244 |
| ENSG00000225511 | ENSG00000150347 | ENSG00000150347 | ENSG00000006555 | ENSG00000150347 |
| ENSG00000185008 | ENSG00000150394 | ENSG00000150394 | ENSG00000006576 | ENSG00000150394 |
| ENSG00000118922 | ENSG00000150551 | ENSG00000150551 | ENSG00000006606 | ENSG00000150551 |
| ENSG00000271109 | ENSG00000150687 | ENSG00000150687 | ENSG00000006607 | ENSG00000150687 |
| ENSG00000263884 | ENSG00000151623 | ENSG00000151623 | ENSG00000006611 | ENSG00000151623 |
| ENSG00000105855 | ENSG00000152217 | ENSG00000152217 | ENSG00000006625 | ENSG00000152217 |
| ENSG00000258405 | ENSG00000152763 | ENSG00000152763 | ENSG00000006634 | ENSG00000152763 |
| ENSG00000155966 | ENSG00000154736 | ENSG00000154736 | ENSG00000006638 | ENSG00000154736 |
| ENSG00000116574 | ENSG00000157765 | ENSG00000157765 | ENSG00000006695 | ENSG00000157765 |
| ENSG00000188295 | ENSG00000162599 | ENSG00000162599 | ENSG00000006747 | ENSG00000162599 |
| ENSG00000139946 | ENSG00000162814 | ENSG00000162814 | ENSG00000006756 | ENSG00000162814 |
| ENSG00000262454 | ENSG00000164463 | ENSG00000164463 | ENSG00000007001 | ENSG00000164463 |
| ENSG00000148541 | ENSG00000164743 | ENSG00000164743 | ENSG00000007062 | ENSG00000164743 |
| ENSG00000161912 | ENSG00000164746 | ENSG00000164746 | ENSG00000007129 | ENSG00000164746 |
| ENSG00000258900 | ENSG00000164949 | ENSG00000164949 | ENSG00000007168 | ENSG00000164949 |
| ENSG00000176204 | ENSG00000165244 | ENSG00000165244 | ENSG00000007202 | ENSG00000165244 |
| ENSG00000279347 | ENSG00000165323 | ENSG00000165323 | ENSG00000007216 | ENSG00000165323 |
| ENSG00000180530 | ENSG00000165617 | ENSG00000165617 | ENSG00000007255 | ENSG00000165617 |
| ENSG00000261116 | ENSG00000165655 | ENSG00000165655 | ENSG00000007306 | ENSG00000165655 |
| ENSG00000188177 | ENSG00000166793 | ENSG00000166793 | ENSG00000007314 | ENSG00000166793 |
| ENSG00000185483 | ENSG00000166866 | ENSG00000166866 | ENSG00000007341 | ENSG00000166866 |

|                 |                 |                 |                 |                 |
|-----------------|-----------------|-----------------|-----------------|-----------------|
| ENSG00000236829 | ENSG00000167995 | ENSG00000167995 | ENSG00000007350 | ENSG00000167995 |
| ENSG00000266490 | ENSG00000168743 | ENSG00000168743 | ENSG00000007376 | ENSG00000168743 |
| ENSG00000204962 | ENSG00000168772 | ENSG00000168772 | ENSG00000007392 | ENSG00000168772 |
| ENSG00000005483 | ENSG00000168916 | ENSG00000168916 | ENSG00000007402 | ENSG00000168916 |
| ENSG00000231551 | ENSG00000169116 | ENSG00000169116 | ENSG00000007541 | ENSG00000169116 |
| ENSG00000234996 | ENSG00000169184 | ENSG00000169184 | ENSG00000007545 | ENSG00000169184 |
| ENSG00000255282 | ENSG00000169432 | ENSG00000169432 | ENSG00000007866 | ENSG00000169432 |
| ENSG00000127152 | ENSG00000169554 | ENSG00000169554 | ENSG00000007908 | ENSG00000169554 |
| ENSG00000271971 | ENSG00000169851 | ENSG00000169851 | ENSG00000007923 | ENSG00000169851 |
| ENSG00000231160 | ENSG00000170214 | ENSG00000170214 | ENSG00000007944 | ENSG00000170214 |
| ENSG00000251562 | ENSG00000170836 | ENSG00000170836 | ENSG00000007952 | ENSG00000170836 |
| ENSG00000274386 | ENSG00000171724 | ENSG00000171724 | ENSG00000007968 | ENSG00000171724 |
| ENSG00000151967 | ENSG00000172059 | ENSG00000172059 | ENSG00000008083 | ENSG00000172059 |
| ENSG00000182463 | ENSG00000174738 | ENSG00000174738 | ENSG00000008086 | ENSG00000174738 |
| ENSG00000141639 | ENSG00000174844 | ENSG00000174844 | ENSG00000008118 | ENSG00000174844 |
| ENSG00000248441 | ENSG00000175745 | ENSG00000175745 | ENSG00000008130 | ENSG00000175745 |
| ENSG00000272720 | ENSG00000176046 | ENSG00000176046 | ENSG00000008196 | ENSG00000176046 |
| ENSG00000186529 | ENSG00000176771 | ENSG00000176771 | ENSG00000008256 | ENSG00000176771 |
| ENSG00000196152 | ENSG00000176788 | ENSG00000176788 | ENSG00000008277 | ENSG00000176788 |
| ENSG00000213453 | ENSG00000176887 | ENSG00000176887 | ENSG00000008283 | ENSG00000176887 |
| ENSG00000246876 | ENSG00000176971 | ENSG00000176971 | ENSG00000008294 | ENSG00000176971 |
| ENSG00000168779 | ENSG00000177565 | ENSG00000177565 | ENSG00000008300 | ENSG00000177565 |
| ENSG00000177822 | ENSG00000177606 | ENSG00000177606 | ENSG00000008311 | ENSG00000177606 |
| ENSG00000106034 | ENSG00000178568 | ENSG00000178568 | ENSG00000008323 | ENSG00000178568 |
| ENSG00000235109 | ENSG00000178573 | ENSG00000178573 | ENSG00000008324 | ENSG00000178573 |
| ENSG00000163431 | ENSG00000178878 | ENSG00000178878 | ENSG00000008394 | ENSG00000178878 |
| ENSG00000265817 | ENSG00000179981 | ENSG00000179981 | ENSG00000008441 | ENSG00000179981 |
| ENSG00000231728 | ENSG00000180530 | ENSG00000180530 | ENSG00000008513 | ENSG00000180530 |
| ENSG00000117724 | ENSG00000180592 | ENSG00000180592 | ENSG00000008710 | ENSG00000180592 |
| ENSG00000133639 | ENSG00000181016 | ENSG00000181016 | ENSG00000008838 | ENSG00000181016 |
| ENSG00000272888 | ENSG00000181449 | ENSG00000181449 | ENSG00000008853 | ENSG00000181449 |
| ENSG00000174804 | ENSG00000182168 | ENSG00000182168 | ENSG00000009307 | ENSG00000182168 |
| ENSG00000244694 | ENSG00000182308 | ENSG00000182308 | ENSG00000009335 | ENSG00000182308 |
| ENSG00000278000 | ENSG00000182330 | ENSG00000182330 | ENSG00000009413 | ENSG00000182330 |
| ENSG00000226853 | ENSG00000183098 | ENSG00000183098 | ENSG00000009694 | ENSG00000183098 |
| ENSG00000260461 | ENSG00000183496 | ENSG00000183496 | ENSG00000009724 | ENSG00000183496 |
| ENSG00000239763 | ENSG00000184349 | ENSG00000184349 | ENSG00000009780 | ENSG00000184349 |
| ENSG00000278175 | ENSG00000185070 | ENSG00000185070 | ENSG00000009790 | ENSG00000185070 |

|                 |                 |                 |                 |                 |
|-----------------|-----------------|-----------------|-----------------|-----------------|
| ENSG00000255524 | ENSG00000185483 | ENSG00000185483 | ENSG00000009830 | ENSG00000185483 |
| ENSG00000172059 | ENSG00000185630 | ENSG00000185630 | ENSG00000009844 | ENSG00000185630 |
| ENSG00000084453 | ENSG00000185736 | ENSG00000185736 | ENSG00000009950 | ENSG00000185736 |
| ENSG00000139364 | ENSG00000186479 | ENSG00000186479 | ENSG00000009954 | ENSG00000186479 |
| ENSG00000185267 | ENSG00000186517 | ENSG00000186517 | ENSG00000010017 | ENSG00000186517 |
| ENSG00000002745 | ENSG00000188177 | ENSG00000188177 | ENSG00000010278 | ENSG00000188177 |
| ENSG00000228409 | ENSG00000188580 | ENSG00000188580 | ENSG00000010295 | ENSG00000188580 |
| ENSG00000188158 | ENSG00000188959 | ENSG00000188959 | ENSG00000010318 | ENSG00000188959 |
| ENSG00000050438 | ENSG00000188993 | ENSG00000188993 | ENSG00000010319 | ENSG00000188993 |
| ENSG00000164684 | ENSG00000189184 | ENSG00000189184 | ENSG00000010322 | ENSG00000189184 |
| ENSG00000168916 | ENSG00000189325 | ENSG00000189325 | ENSG00000010404 | ENSG00000189325 |
| ENSG00000187372 | ENSG00000196159 | ENSG00000196159 | ENSG00000010539 | ENSG00000196159 |
| ENSG00000135315 | ENSG00000196724 | ENSG00000196724 | ENSG00000010610 | ENSG00000196724 |
| ENSG00000176896 | ENSG00000196781 | ENSG00000196781 | ENSG00000010626 | ENSG00000196781 |
| ENSG00000172086 | ENSG00000196782 | ENSG00000196782 | ENSG00000010671 | ENSG00000196782 |
| ENSG00000105499 | ENSG00000198732 | ENSG00000198732 | ENSG00000010932 | ENSG00000198732 |
| ENSG00000245526 | ENSG00000204682 | ENSG00000204682 | ENSG00000011105 | ENSG00000204682 |
| ENSG00000196628 | ENSG00000205189 | ENSG00000205189 | ENSG00000011114 | ENSG00000205189 |
| ENSG00000137203 | ENSG00000218336 | ENSG00000218336 | ENSG00000011295 | ENSG00000218336 |
| ENSG00000168143 | ENSG00000235109 | ENSG00000235109 | ENSG00000013275 | ENSG00000235109 |
| ENSG00000168772 | ENSG00000242689 | ENSG00000242689 | ENSG00000013588 | ENSG00000242689 |
| ENSG00000145242 | ENSG00000250120 | ENSG00000250120 | ENSG00000015153 | ENSG00000250120 |
| ENSG00000236204 | ENSG00000251258 | ENSG00000251258 | ENSG00000016082 | ENSG00000251258 |
| ENSG00000213073 | ENSG00000253305 | ENSG00000253305 | ENSG00000016864 | ENSG00000253305 |
| ENSG00000111215 | ENSG00000253846 | ENSG00000253846 | ENSG00000017260 | ENSG00000253846 |
| ENSG00000145945 | ENSG00000258405 | ENSG00000258405 | ENSG00000018625 | ENSG00000258405 |
| ENSG00000125551 | ENSG00000265817 | ENSG00000265817 | ENSG00000020633 | ENSG00000265817 |
| ENSG00000230002 | ENSG00000265972 | ENSG00000265972 | ENSG00000021300 | ENSG00000265972 |
| ENSG00000239335 | ENSG00000276644 | ENSG00000276644 | ENSG00000024862 | ENSG00000276644 |
| ENSG00000182903 | ENSG00000277443 | ENSG00000277443 | ENSG00000025293 | ENSG00000277443 |
| ENSG00000196782 | ENSG0000026025  | ENSG00000026025 | ENSG00000001084 |                 |
| ENSG00000046653 | ENSG00000077063 | ENSG00000077063 | ENSG00000002330 |                 |
| ENSG00000107485 | ENSG00000099251 | ENSG00000099251 | ENSG00000003400 |                 |
| ENSG00000136040 | ENSG00000102032 | ENSG00000102032 | ENSG00000003402 |                 |
| ENSG00000009413 | ENSG00000106536 | ENSG00000106536 | ENSG00000003989 |                 |
| ENSG00000113580 | ENSG00000112175 | ENSG00000112175 | ENSG00000004478 |                 |
| ENSG00000224843 | ENSG00000113916 | ENSG00000113916 | ENSG00000004766 |                 |
| ENSG00000158321 | ENSG00000118407 | ENSG00000118407 | ENSG00000004939 |                 |

|                 |                 |                 |                 |
|-----------------|-----------------|-----------------|-----------------|
| ENSG00000253598 | ENSG00000124635 | ENSG00000124635 | ENSG00000005075 |
| ENSG00000260526 | ENSG00000126368 | ENSG00000126368 | ENSG00000005156 |
| ENSG00000261326 | ENSG00000130222 | ENSG00000130222 | ENSG00000005238 |
| ENSG00000230185 | ENSG00000134363 | ENSG00000134363 | ENSG00000005381 |
| ENSG00000143816 | ENSG00000141665 | ENSG00000141665 | ENSG00000006025 |
| ENSG00000175105 | ENSG00000143032 | ENSG00000143032 | ENSG00000006042 |
| ENSG00000178878 | ENSG00000143110 | ENSG00000143110 | ENSG00000006047 |
| ENSG00000235609 | ENSG00000144010 | ENSG00000144010 | ENSG00000006125 |
| ENSG00000272070 | ENSG00000144015 | ENSG00000144015 | ENSG00000006128 |
| ENSG00000250222 | ENSG00000144188 | ENSG00000144188 | ENSG00000006194 |
| ENSG00000267284 | ENSG00000144214 | ENSG00000144214 | ENSG00000006210 |
| ENSG00000248015 | ENSG00000157445 | ENSG00000157445 | ENSG00000006652 |
| ENSG00000272669 | ENSG00000158373 | ENSG00000158373 | ENSG00000006704 |
| ENSG00000235946 | ENSG00000158406 | ENSG00000158406 | ENSG00000006715 |
| ENSG00000138639 | ENSG00000158486 | ENSG00000158486 | ENSG00000006740 |
| ENSG00000116678 | ENSG00000159208 | ENSG00000159208 | ENSG00000006744 |
| ENSG00000109819 | ENSG00000163009 | ENSG00000163009 | ENSG00000006757 |
| ENSG00000224886 | ENSG00000164309 | ENSG00000164309 | ENSG00000006831 |
| ENSG00000150551 | ENSG00000164442 | ENSG00000164442 | ENSG00000006837 |
| ENSG00000219626 | ENSG00000164708 | ENSG00000164708 | ENSG00000007047 |
| ENSG00000137968 | ENSG00000165182 | ENSG00000165182 | ENSG00000007171 |
| ENSG00000122257 | ENSG00000165555 | ENSG00000165555 | ENSG00000007237 |
| ENSG00000226476 | ENSG00000166013 | ENSG00000166013 | ENSG00000007312 |
| ENSG00000253414 | ENSG00000168542 | ENSG00000168542 | ENSG00000007372 |
| ENSG00000166432 | ENSG00000168930 | ENSG00000168930 | ENSG00000007516 |
| ENSG00000270933 | ENSG00000171951 | ENSG00000171951 | ENSG00000008056 |
| ENSG00000121297 | ENSG00000180532 | ENSG00000180532 | ENSG00000008516 |
| ENSG00000265218 | ENSG00000180573 | ENSG00000180573 | ENSG00000008517 |
| ENSG00000008083 | ENSG00000180596 | ENSG00000180596 | ENSG00000008735 |
| ENSG00000153714 | ENSG00000182053 | ENSG00000182053 | ENSG00000008952 |
| ENSG00000184347 | ENSG00000183336 | ENSG00000183336 | ENSG00000009709 |
| ENSG00000128052 | ENSG00000183813 | ENSG00000183813 | ENSG00000009765 |
| ENSG00000224892 | ENSG00000186976 | ENSG00000186976 | ENSG00000010030 |
| ENSG00000260077 | ENSG00000187775 | ENSG00000187775 | ENSG00000010072 |
| ENSG00000196357 | ENSG00000187837 | ENSG00000187837 | ENSG00000010256 |
| ENSG00000168702 | ENSG00000188738 | ENSG00000188738 | ENSG00000010310 |
| ENSG00000250337 | ENSG00000189253 | ENSG00000189253 | ENSG00000010379 |
| ENSG00000106069 | ENSG00000196787 | ENSG00000196787 | ENSG00000010704 |



|                 |                 |                 |                 |
|-----------------|-----------------|-----------------|-----------------|
| ENSG00000271918 | ENSG00000196812 | ENSG00000196812 | ENSG00000010803 |
| ENSG00000183287 | ENSG00000196890 | ENSG00000196890 | ENSG00000010810 |
| ENSG00000250305 | ENSG00000198075 | ENSG00000198075 | ENSG00000010818 |
| ENSG00000187720 | ENSG00000203740 | ENSG00000203740 | ENSG00000011007 |
| ENSG00000129749 | ENSG00000203814 | ENSG00000203814 | ENSG00000011009 |
| ENSG00000169554 | ENSG00000204449 | ENSG00000204449 | ENSG00000011021 |
| ENSG00000272767 | ENSG00000204450 | ENSG00000204450 | ENSG00000011028 |
| ENSG00000213363 | ENSG00000204455 | ENSG00000204455 | ENSG00000011052 |
| ENSG00000262728 | ENSG00000204510 | ENSG00000204510 | ENSG00000011083 |
| ENSG00000158258 | ENSG00000210151 | ENSG00000210151 | ENSG00000011143 |
| ENSG00000124743 | ENSG00000213363 | ENSG00000213363 | ENSG00000011198 |
| ENSG00000261251 | ENSG00000213453 | ENSG00000213453 | ENSG00000011201 |
| ENSG00000272142 | ENSG00000214243 | ENSG00000214243 | ENSG00000011258 |
| ENSG00000180592 | ENSG00000215018 | ENSG00000215018 | ENSG00000011275 |
| ENSG00000247675 | ENSG00000223417 | ENSG00000223417 | ENSG00000011304 |
| ENSG00000010030 | ENSG00000223638 | ENSG00000223638 | ENSG00000011332 |
| ENSG00000151164 | ENSG00000223855 | ENSG00000223855 | ENSG00000011347 |
| ENSG00000165617 | ENSG00000224294 | ENSG00000224294 | ENSG00000011376 |
| ENSG00000153234 | ENSG00000224892 | ENSG00000224892 | ENSG00000011405 |
| ENSG00000113916 | ENSG00000225420 | ENSG00000225420 | ENSG00000011422 |
| ENSG00000254402 | ENSG00000225581 | ENSG00000225581 | ENSG00000011426 |
| ENSG00000165182 | ENSG00000225792 | ENSG00000225792 | ENSG00000011451 |
| ENSG00000081818 | ENSG00000225793 | ENSG00000225793 | ENSG00000011454 |
| ENSG00000152784 | ENSG00000226476 | ENSG00000226476 | ENSG00000011465 |
| ENSG00000280367 | ENSG00000228314 | ENSG00000228314 | ENSG00000011478 |
| ENSG00000225465 | ENSG00000228409 | ENSG00000228409 | ENSG00000011485 |
| ENSG00000100027 | ENSG00000228451 | ENSG00000228451 | ENSG00000011523 |
| ENSG00000261652 | ENSG00000229127 | ENSG00000229127 | ENSG00000011600 |
| ENSG00000106258 | ENSG00000229292 | ENSG00000229292 | ENSG00000011638 |
| ENSG00000145687 | ENSG00000229619 | ENSG00000229619 | ENSG00000011677 |
| ENSG00000260265 | ENSG00000229978 | ENSG00000229978 | ENSG00000012048 |
| ENSG00000106829 | ENSG00000230069 | ENSG00000230069 | ENSG00000012061 |
| ENSG00000116785 | ENSG00000230699 | ENSG00000230699 | ENSG00000012124 |
| ENSG00000251432 | ENSG00000231160 | ENSG00000231160 | ENSG00000012171 |
| ENSG00000147862 | ENSG00000233030 | ENSG00000233030 | ENSG00000012174 |
| ENSG00000145431 | ENSG00000233045 | ENSG00000233045 | ENSG00000012211 |
| ENSG00000110693 | ENSG00000233639 | ENSG00000233639 | ENSG00000012232 |
| ENSG00000110031 | ENSG00000233802 | ENSG00000233802 | ENSG00000012504 |

|                 |                 |                 |                 |
|-----------------|-----------------|-----------------|-----------------|
| ENSG00000186976 | ENSG00000233822 | ENSG00000233822 | ENSG00000012660 |
| ENSG00000260589 | ENSG00000233930 | ENSG00000233930 | ENSG00000012817 |
| ENSG00000223855 | ENSG00000234424 | ENSG00000234424 | ENSG00000012822 |
| ENSG00000224505 | ENSG00000234585 | ENSG00000234585 | ENSG00000012963 |
| ENSG00000221883 | ENSG00000234996 | ENSG00000234996 | ENSG00000012983 |
| ENSG00000120327 | ENSG00000235100 | ENSG00000235100 | ENSG00000013016 |
| ENSG00000166922 | ENSG00000235268 | ENSG00000235268 | ENSG00000013288 |
| ENSG00000104957 | ENSG00000235618 | ENSG00000235618 | ENSG00000013293 |
| ENSG00000077092 | ENSG00000236175 | ENSG00000236175 | ENSG00000013297 |
| ENSG00000253305 | ENSG00000236941 | ENSG00000236941 | ENSG00000013306 |
| ENSG00000178568 | ENSG00000236993 | ENSG00000236993 | ENSG00000013374 |
| ENSG00000272562 | ENSG00000237187 | ENSG00000237187 | ENSG00000013375 |
| ENSG00000274422 | ENSG00000237693 | ENSG00000237693 | ENSG00000013392 |
| ENSG00000117461 | ENSG00000237706 | ENSG00000237706 | ENSG00000013523 |
| ENSG00000170271 | ENSG00000239405 | ENSG00000239405 | ENSG00000013561 |
| ENSG00000153094 | ENSG00000240291 | ENSG00000240291 | ENSG00000013563 |
| ENSG00000147852 | ENSG00000240498 | ENSG00000240498 | ENSG00000013573 |
| ENSG00000217236 | ENSG00000241170 | ENSG00000241170 | ENSG00000013583 |
| ENSG00000198342 | ENSG00000243819 | ENSG00000243819 | ENSG00000013619 |
| ENSG00000227885 | ENSG00000245205 | ENSG00000245205 | ENSG00000013725 |
| ENSG00000173531 | ENSG00000245532 | ENSG00000245532 | ENSG00000014123 |
| ENSG00000082684 | ENSG00000246876 | ENSG00000246876 | ENSG00000014138 |
| ENSG00000117586 | ENSG00000247809 | ENSG00000247809 | ENSG00000014216 |
| ENSG00000204802 | ENSG00000248441 | ENSG00000248441 | ENSG00000014257 |
| ENSG00000185432 | ENSG00000248596 | ENSG00000248596 | ENSG00000014824 |
| ENSG00000176046 | ENSG00000248774 | ENSG00000248774 | ENSG00000014914 |
| ENSG00000116774 | ENSG00000249156 | ENSG00000249156 | ENSG00000014919 |
| ENSG00000260572 | ENSG00000249620 | ENSG00000249620 | ENSG00000015133 |
| ENSG00000198237 | ENSG00000250337 | ENSG00000250337 | ENSG00000015171 |
| ENSG00000261732 | ENSG00000250386 | ENSG00000250386 | ENSG00000015413 |
| ENSG00000138161 | ENSG00000250492 | ENSG00000250492 | ENSG00000015475 |
| ENSG00000117569 | ENSG00000250519 | ENSG00000250519 | ENSG00000015520 |
| ENSG00000106701 | ENSG00000250546 | ENSG00000250546 | ENSG00000015532 |
| ENSG00000038427 | ENSG00000250782 | ENSG00000250782 | ENSG00000015568 |
| ENSG00000033122 | ENSG00000251022 | ENSG00000251022 | ENSG00000015592 |
| ENSG00000224046 | ENSG00000251095 | ENSG00000251095 | ENSG00000015676 |
| ENSG00000188994 | ENSG00000251562 | ENSG00000251562 | ENSG00000016391 |
| ENSG00000099377 | ENSG00000251634 | ENSG00000251634 | ENSG00000016402 |

|                 |                 |                 |                 |
|-----------------|-----------------|-----------------|-----------------|
| ENSG00000149294 | ENSG00000254764 | ENSG00000254764 | ENSG00000017427 |
| ENSG00000261557 | ENSG00000255389 | ENSG00000255389 | ENSG00000017483 |
| ENSG00000162849 | ENSG00000255471 | ENSG00000255471 | ENSG00000017797 |
| ENSG00000261126 | ENSG00000255855 | ENSG00000255855 | ENSG00000018189 |
| ENSG00000177732 | ENSG00000256304 | ENSG00000256304 | ENSG00000018236 |
| ENSG00000144668 | ENSG00000256779 | ENSG00000256779 | ENSG00000018280 |
| ENSG00000120669 | ENSG00000257261 | ENSG00000257261 | ENSG00000018408 |
| ENSG00000185261 | ENSG00000257951 | ENSG00000257951 | ENSG00000018510 |
| ENSG00000107562 | ENSG00000258357 | ENSG00000258357 | ENSG00000018610 |
| ENSG00000183336 | ENSG00000258472 | ENSG00000258472 | ENSG00000018699 |
| ENSG00000169239 | ENSG00000259275 | ENSG00000259275 | ENSG00000018869 |
| ENSG00000176371 | ENSG00000259456 | ENSG00000259456 | ENSG00000019144 |
| ENSG00000275560 | ENSG00000260077 | ENSG00000260077 | ENSG00000019169 |
| ENSG00000111276 | ENSG00000260103 | ENSG00000260103 | ENSG00000019186 |
| ENSG00000169851 | ENSG00000260572 | ENSG00000260572 | ENSG00000019485 |
| ENSG00000184349 | ENSG00000260589 | ENSG00000260589 | ENSG00000019505 |
| ENSG00000138670 | ENSG00000260727 | ENSG00000260727 | ENSG00000019549 |
| ENSG00000250120 | ENSG00000261087 | ENSG00000261087 | ENSG00000019582 |
| ENSG00000233325 | ENSG00000261116 | ENSG00000261116 | ENSG00000019991 |
| ENSG00000105327 | ENSG00000261136 | ENSG00000261136 | ENSG00000019995 |
| ENSG00000114861 | ENSG00000261557 | ENSG00000261557 | ENSG00000020129 |
| ENSG00000126016 | ENSG00000262728 | ENSG00000262728 | ENSG00000020181 |
| ENSG00000109787 | ENSG00000263080 | ENSG00000263080 | ENSG00000020256 |
| ENSG00000123095 | ENSG00000263745 | ENSG00000263745 | ENSG00000020577 |
| ENSG00000269834 | ENSG00000265962 | ENSG00000265962 | ENSG00000020922 |
| ENSG00000272630 | ENSG00000266490 | ENSG00000266490 | ENSG00000021574 |
| ENSG00000197989 | ENSG00000267365 | ENSG00000267365 | ENSG00000021645 |
| ENSG00000167081 | ENSG00000267731 | ENSG00000267731 | ENSG00000021762 |
| ENSG00000276900 | ENSG00000268756 | ENSG00000268756 | ENSG00000021852 |
| ENSG00000234345 | ENSG00000268799 | ENSG00000268799 | ENSG00000022267 |
| ENSG00000281195 | ENSG00000269466 | ENSG00000269466 | ENSG00000022277 |
| ENSG00000134595 | ENSG00000269974 | ENSG00000269974 | ENSG00000022355 |
| ENSG00000189136 | ENSG00000270276 | ENSG00000270276 | ENSG00000022567 |
| ENSG00000258472 | ENSG00000270605 | ENSG00000270605 | ENSG00000022840 |
| ENSG00000204584 | ENSG00000270681 | ENSG00000270681 | ENSG00000023041 |
| ENSG00000204311 | ENSG00000270876 | ENSG00000270876 | ENSG00000023171 |
| ENSG00000169946 | ENSG00000270882 | ENSG00000270882 | ENSG00000023287 |
| ENSG00000254122 | ENSG00000271474 | ENSG00000271474 | ENSG00000023318 |

|                 |                 |                 |                 |
|-----------------|-----------------|-----------------|-----------------|
| ENSG00000176971 | ENSG00000271918 | ENSG00000271918 | ENSG00000023445 |
| ENSG00000174738 | ENSG00000272341 | ENSG00000272341 | ENSG00000023516 |
| ENSG00000183098 | ENSG00000272398 | ENSG00000272398 | ENSG00000023608 |
| ENSG00000273007 | ENSG00000272468 | ENSG00000272468 | ENSG00000023697 |
| ENSG00000241547 | ENSG00000272720 | ENSG00000272720 | ENSG00000023734 |
| ENSG00000148737 | ENSG00000272767 | ENSG00000272767 | ENSG00000023892 |
| ENSG00000248019 | ENSG00000272870 | ENSG00000272870 | ENSG00000023902 |
| ENSG00000179981 | ENSG00000273038 | ENSG00000273038 | ENSG00000023909 |
| ENSG00000141665 | ENSG00000273802 | ENSG00000273802 | ENSG00000024048 |
| ENSG00000229956 | ENSG00000274290 | ENSG00000274290 | ENSG00000024422 |
| ENSG00000184486 | ENSG00000274460 | ENSG00000274460 | ENSG00000024526 |
| ENSG00000145632 | ENSG00000276966 | ENSG00000276966 | ENSG00000025039 |
| ENSG00000185070 | ENSG00000277383 | ENSG00000277383 | ENSG00000025156 |
| ENSG00000275620 | ENSG00000277862 | ENSG00000277862 | ENSG00000025770 |
| ENSG00000259275 | ENSG00000278238 | ENSG00000278238 | ENSG00000025772 |
| ENSG00000218336 | ENSG00000279208 | ENSG00000279208 | ENSG00000025796 |
| ENSG00000196812 | ENSG00000279355 | ENSG00000279355 | ENSG00000025800 |
| ENSG00000164949 | ENSG00000279369 | ENSG00000279369 | ENSG00000026103 |
| ENSG00000112175 | ENSG00000279865 | ENSG00000279865 | ENSG00000026508 |
| ENSG00000156650 | ENSG00000283235 | ENSG00000283235 | ENSG00000026559 |
| ENSG00000234329 | ENSG00000283740 | ENSG00000283740 | ENSG00000026652 |
| ENSG00000171724 | ENSG00000283776 | ENSG00000283776 | ENSG00000026751 |
| ENSG00000166473 | ENSG00000283873 | ENSG00000283873 | ENSG00000026950 |
| ENSG00000101928 | ENSG00000284018 | ENSG00000284018 | ENSG00000027075 |
| ENSG00000198846 | ENSG00000284306 | ENSG00000284306 | ENSG00000028116 |
| ENSG00000176723 | ENSG00000284438 | ENSG00000284438 | ENSG00000028137 |
| ENSG00000253816 | ENSG00000284526 | ENSG00000284526 | ENSG00000028203 |
| ENSG00000162814 | ENSG00000284546 | ENSG00000284546 | ENSG00000028277 |
| ENSG00000196605 | ENSG00000189060 |                 | ENSG00000028310 |
| ENSG00000177599 | ENSG00000151725 |                 | ENSG00000028528 |
| ENSG00000196263 | ENSG00000148677 |                 | ENSG00000029153 |
| ENSG00000083817 | ENSG00000149201 |                 | ENSG00000029363 |
| ENSG00000186496 | ENSG00000087074 |                 | ENSG00000029364 |
| ENSG00000149050 | ENSG00000115738 |                 | ENSG00000029534 |
| ENSG00000121417 | ENSG00000135269 |                 | ENSG00000029559 |
| ENSG00000096654 | ENSG00000174371 |                 | ENSG00000029639 |
| ENSG00000205189 | ENSG00000112742 |                 | ENSG00000029725 |
| ENSG00000228775 | ENSG00000170558 |                 | ENSG00000029993 |

|                 |                 |                 |
|-----------------|-----------------|-----------------|
| ENSG00000178201 | ENSG00000149948 | ENSG00000030066 |
| ENSG00000100271 | ENSG00000105974 | ENSG00000030110 |
| ENSG00000155428 | ENSG00000170017 | ENSG00000030304 |
| ENSG00000071575 | ENSG00000168564 | ENSG00000030419 |
| ENSG00000230359 | ENSG00000174579 | ENSG00000030582 |
| ENSG00000271092 | ENSG00000248873 | ENSG00000031003 |
| ENSG00000228158 | ENSG00000138814 | ENSG00000031081 |
| ENSG00000251022 | ENSG00000236539 | ENSG00000031691 |
| ENSG00000229950 | ENSG00000171476 | ENSG00000031698 |
| ENSG00000168769 | ENSG00000143333 | ENSG00000031823 |
| ENSG00000101463 | ENSG00000137831 | ENSG00000032219 |
| ENSG00000254995 | ENSG00000116044 | ENSG00000032389 |
| ENSG00000242866 | ENSG00000248971 | ENSG00000033011 |
| ENSG00000145147 | ENSG00000214900 | ENSG00000033030 |
| ENSG00000134294 | ENSG00000138050 | ENSG00000033050 |
| ENSG00000112246 | ENSG00000165072 | ENSG00000033122 |
| ENSG00000137872 | ENSG00000165480 | ENSG00000033170 |
| ENSG00000124813 | ENSG00000168556 | ENSG00000033178 |
| ENSG00000108309 | ENSG00000066468 | ENSG00000033327 |
| ENSG00000230364 | ENSG00000197050 | ENSG00000033627 |
| ENSG00000232104 | ENSG00000259485 | ENSG00000033800 |
| ENSG00000123094 | ENSG00000123572 | ENSG00000033867 |
| ENSG00000185532 | ENSG0000023608  | ENSG00000034053 |
| ENSG00000106536 | ENSG00000121361 | ENSG00000034152 |
| ENSG00000240694 | ENSG00000164776 | ENSG00000034239 |
| ENSG00000162407 | ENSG00000100142 | ENSG00000034533 |
| ENSG00000182621 | ENSG00000228169 | ENSG00000034677 |
| ENSG00000171033 | ENSG00000229083 | ENSG00000034713 |
| ENSG00000134853 | ENSG00000239269 | ENSG00000034971 |
| ENSG00000168300 | ENSG00000146707 | ENSG00000035115 |
| ENSG00000240764 | ENSG00000134438 | ENSG00000035141 |
| ENSG00000253731 | ENSG00000249465 | ENSG00000035403 |
| ENSG00000113212 | ENSG00000168621 | ENSG00000035499 |
| ENSG00000113205 | ENSG00000064042 | ENSG00000035664 |
| ENSG00000120324 | ENSG00000259802 | ENSG00000035687 |
| ENSG00000185551 | ENSG00000237440 | ENSG00000035720 |
| ENSG00000173614 | ENSG00000203943 | ENSG00000035862 |
| ENSG00000177453 | ENSG00000196081 | ENSG00000035928 |

|                 |                 |                 |
|-----------------|-----------------|-----------------|
| ENSG00000140396 | ENSG00000220804 | ENSG00000036054 |
| ENSG00000186310 | ENSG00000188404 | ENSG00000036257 |
| ENSG00000188613 | ENSG00000226102 | ENSG00000036530 |
| ENSG00000281026 | ENSG00000240914 | ENSG00000036549 |
| ENSG00000166866 | ENSG00000163535 | ENSG00000036565 |
| ENSG00000059728 | ENSG00000180376 | ENSG00000036672 |
| ENSG00000262902 | ENSG00000139174 | ENSG00000036828 |
| ENSG00000221184 | ENSG00000085276 | ENSG00000037241 |
| ENSG00000203740 | ENSG00000004799 | ENSG00000037280 |
| ENSG00000102316 | ENSG00000158014 | ENSG00000037474 |
| ENSG00000188993 | ENSG00000011201 | ENSG00000037637 |
| ENSG00000185158 | ENSG00000235245 | ENSG00000037749 |
| ENSG00000203441 | ENSG00000112182 | ENSG00000037757 |
| ENSG00000111052 | ENSG00000226763 | ENSG00000037897 |
| ENSG00000115548 | ENSG00000229124 | ENSG00000037965 |
| ENSG00000176049 | ENSG00000242952 | ENSG00000038002 |
| ENSG00000077684 | ENSG00000234911 | ENSG00000038274 |
| ENSG00000105655 | ENSG00000185339 | ENSG00000038295 |
| ENSG00000185950 | ENSG00000180998 | ENSG00000038382 |
| ENSG00000168264 | ENSG00000267796 | ENSG00000038427 |
| ENSG00000168918 | ENSG00000114423 | ENSG00000038532 |
| ENSG00000125430 | ENSG00000275342 | ENSG00000038945 |
| ENSG00000135547 | ENSG00000146070 | ENSG00000039068 |
| ENSG00000253203 | ENSG00000119865 | ENSG00000039123 |
| ENSG00000123201 | ENSG00000218890 | ENSG00000039139 |
| ENSG00000196275 | ENSG00000249069 | ENSG00000039319 |
| ENSG00000106571 | ENSG00000138028 | ENSG00000039523 |
| ENSG00000164404 | ENSG00000277462 | ENSG00000039537 |
| ENSG00000053254 | ENSG00000218358 | ENSG00000039560 |
| ENSG00000118407 | ENSG00000221994 | ENSG00000040199 |
| ENSG00000112773 | ENSG00000214892 | ENSG00000040341 |
| ENSG00000235618 | ENSG00000153832 | ENSG00000040531 |
| ENSG00000224032 | ENSG00000270964 | ENSG00000040633 |
| ENSG00000245205 | ENSG00000272711 | ENSG00000040933 |
| ENSG00000179532 | ENSG00000183671 | ENSG00000041353 |
| ENSG00000176124 | ENSG00000166578 | ENSG00000041515 |
| ENSG00000134574 | ENSG00000187624 | ENSG00000041802 |
| ENSG00000077063 | ENSG00000137672 | ENSG00000041982 |

ENSG00000143578  
ENSG00000214575  
ENSG00000080573  
ENSG00000164442  
ENSG00000183196  
ENSG00000111860  
ENSG00000048740  
ENSG00000147883  
ENSG00000163171  
ENSG00000184305  
ENSG00000186409  
ENSG00000272168  
ENSG00000204682  
ENSG00000145349  
ENSG00000183049  
ENSG00000153956  
ENSG00000164743  
ENSG00000164746  
ENSG00000182326  
ENSG00000010671  
ENSG00000138696  
ENSG00000176788  
ENSG00000100852  
ENSG00000004777  
ENSG00000279355  
ENSG00000233435  
ENSG00000214273  
ENSG00000198221  
ENSG00000142303  
ENSG00000087085  
ENSG00000223764  
ENSG00000260293  
ENSG00000259943  
ENSG00000254815  
ENSG00000244627  
ENSG00000219665  
ENSG00000215158  
ENSG00000254701

ENSG00000146674  
ENSG00000270011  
ENSG00000049192  
ENSG00000138653  
ENSG00000150636  
ENSG00000205592  
ENSG00000103460  
ENSG00000105792  
ENSG00000157168  
ENSG00000260339  
ENSG00000141934  
ENSG00000269906  
ENSG00000231458  
ENSG00000250790  
ENSG00000166262  
ENSG00000152402  
ENSG00000169031  
ENSG00000137090  
ENSG00000109906  
ENSG00000176884  
ENSG00000247728  
ENSG00000246528  
ENSG00000254427  
ENSG00000283403  
ENSG00000226468  
ENSG00000226754  
ENSG00000271888  
ENSG00000226471  
ENSG00000251867  
ENSG00000260244  
ENSG00000279145  
ENSG00000120675  
ENSG00000148848  
ENSG00000148053  
ENSG00000271614  
ENSG00000135346  
ENSG00000230043  
ENSG00000259051

ENSG00000041988  
ENSG00000042062  
ENSG00000042088  
ENSG00000042286  
ENSG00000042429  
ENSG00000042445  
ENSG00000042493  
ENSG00000042753  
ENSG00000042781  
ENSG00000042980  
ENSG00000043039  
ENSG00000043093  
ENSG00000043143  
ENSG00000043355  
ENSG00000043462  
ENSG00000043514  
ENSG00000043591  
ENSG00000044012  
ENSG00000044115  
ENSG00000044446  
ENSG00000044459  
ENSG00000044524  
ENSG00000044574  
ENSG00000046604  
ENSG00000046647  
ENSG00000046653  
ENSG00000046889  
ENSG00000047056  
ENSG00000047188  
ENSG00000047230  
ENSG00000047249  
ENSG00000047365  
ENSG00000047410  
ENSG00000047457  
ENSG00000047578  
ENSG00000047579  
ENSG00000047597  
ENSG00000047617

ENSG00000263745  
ENSG00000269399  
ENSG00000241288  
ENSG00000272301  
ENSG00000242622  
ENSG00000272870  
ENSG00000280239  
ENSG00000260966  
ENSG00000279520  
ENSG00000262877  
ENSG00000279369  
ENSG00000276728  
ENSG00000241764  
ENSG00000279673  
ENSG00000259366  
ENSG00000241170  
ENSG00000268670  
ENSG00000228395  
ENSG00000277383  
ENSG00000279511  
ENSG00000271895  
ENSG00000280061  
ENSG00000256092  
ENSG00000259349  
ENSG00000272812  
ENSG00000269974  
ENSG00000279199  
ENSG00000183779  
ENSG00000198795  
ENSG00000165244  
ENSG00000176293  
ENSG00000143184  
ENSG00000197355  
ENSG00000154310  
ENSG00000147003  
ENSG00000261115  
ENSG00000144339  
ENSG00000239405

ENSG00000114315  
ENSG00000137193  
ENSG00000232956  
ENSG00000198734  
ENSG00000173530  
ENSG00000128610  
ENSG00000162772  
ENSG00000115414  
ENSG00000115274  
ENSG00000121621  
ENSG00000102554  
ENSG00000138182  
ENSG00000115963  
ENSG00000163659  
ENSG00000086967  
ENSG00000101384  
ENSG00000197168  
ENSG00000213315  
ENSG00000261934  
ENSG00000230847  
ENSG00000267178  
ENSG00000146592  
ENSG00000270067  
ENSG00000265254  
ENSG00000106546  
ENSG00000232368  
ENSG00000278974  
ENSG00000254480  
ENSG00000150630  
ENSG00000104313  
ENSG00000118898  
ENSG00000151012  
ENSG00000134533  
ENSG00000176697  
ENSG00000266709  
ENSG00000179546  
ENSG00000137727  
ENSG00000231154

ENSG00000047621  
ENSG00000047634  
ENSG00000047644  
ENSG00000047648  
ENSG00000047849  
ENSG00000047932  
ENSG00000048028  
ENSG00000048052  
ENSG00000048140  
ENSG00000048162  
ENSG00000048342  
ENSG00000048392  
ENSG00000048471  
ENSG00000048540  
ENSG00000048544  
ENSG00000048545  
ENSG00000048707  
ENSG00000048740  
ENSG00000048828  
ENSG00000048991  
ENSG00000049089  
ENSG00000049130  
ENSG00000049167  
ENSG00000049192  
ENSG00000049239  
ENSG00000049245  
ENSG00000049246  
ENSG00000049247  
ENSG00000049249  
ENSG00000049283  
ENSG00000049449  
ENSG00000049540  
ENSG00000049541  
ENSG00000049618  
ENSG00000049656  
ENSG00000049759  
ENSG00000049768  
ENSG00000049769



|                 |                 |                 |
|-----------------|-----------------|-----------------|
| ENSG00000135111 | ENSG00000205323 | ENSG00000049883 |
| ENSG00000198075 | ENSG00000259495 | ENSG00000050030 |
| ENSG00000149634 | ENSG00000198153 | ENSG00000050130 |
| ENSG00000228451 | ENSG00000006128 | ENSG00000050165 |
| ENSG00000225953 | ENSG00000215386 | ENSG00000050327 |
| ENSG00000004139 | ENSG00000114200 | ENSG00000050344 |
| ENSG00000079102 | ENSG00000172748 | ENSG00000050393 |
| ENSG00000100784 | ENSG00000178127 | ENSG00000050405 |
| ENSG00000177519 | ENSG00000259315 | ENSG00000050426 |
| ENSG00000140986 | ENSG00000138669 | ENSG00000050438 |
| ENSG00000223638 | ENSG00000272345 | ENSG00000050555 |
| ENSG00000050628 | ENSG00000156463 | ENSG00000050628 |
| ENSG00000150687 | ENSG00000239389 | ENSG00000050730 |
| ENSG00000118557 | ENSG00000166923 | ENSG00000050748 |
| ENSG00000120278 | ENSG00000259663 | ENSG00000050767 |
| ENSG00000134627 | ENSG00000138675 | ENSG00000051009 |
| ENSG00000262209 | ENSG00000269113 | ENSG00000051108 |
| ENSG00000081853 | ENSG00000113532 | ENSG00000051180 |
| ENSG00000267270 | ENSG00000280426 | ENSG00000051341 |
| ENSG00000116117 | ENSG00000255129 | ENSG00000051382 |
| ENSG00000180914 | ENSG00000261560 | ENSG00000051523 |
| ENSG00000198156 | ENSG00000141433 | ENSG00000051596 |
| ENSG00000245532 | ENSG00000251664 | ENSG00000052126 |
| ENSG00000249437 | ENSG00000159450 | ENSG00000052344 |
| ENSG00000255823 | ENSG00000099260 | ENSG00000052723 |
| ENSG00000003987 | ENSG00000156475 | ENSG00000052749 |
| ENSG00000171843 | ENSG00000277449 | ENSG00000052795 |
| ENSG00000277443 | ENSG00000251129 | ENSG00000052802 |
| ENSG00000253161 | ENSG00000128285 | ENSG00000052841 |
| ENSG00000250584 | ENSG00000067082 | ENSG00000052850 |
| ENSG00000196196 | ENSG00000246465 | ENSG00000053108 |
| ENSG00000120370 | ENSG00000249859 | ENSG00000053254 |
| ENSG00000143507 | ENSG00000266983 | ENSG00000053371 |
| ENSG00000134256 | ENSG00000217648 | ENSG00000053372 |
| ENSG00000256304 | ENSG00000140527 | ENSG00000053438 |
| ENSG00000204387 | ENSG00000232906 | ENSG00000053524 |
| ENSG00000105409 | ENSG00000186056 | ENSG00000053702 |
| ENSG00000171681 | ENSG00000108932 | ENSG00000053770 |

ENSG00000145536  
ENSG00000077522  
ENSG00000160179  
ENSG00000179978  
ENSG00000279208  
ENSG00000279696  
ENSG00000261754  
ENSG00000233045  
ENSG00000261136  
ENSG00000185065  
ENSG00000261879  
ENSG00000275481  
ENSG00000215022  
ENSG00000273448  
ENSG00000283757  
ENSG00000279456  
ENSG00000159915  
ENSG00000175564  
ENSG00000196781  
ENSG00000147606  
ENSG00000207081  
ENSG00000186472  
ENSG00000146001  
ENSG00000113248  
ENSG00000229619  
ENSG00000173988  
ENSG00000049130  
ENSG00000135116  
ENSG00000105996  
ENSG00000237125  
ENSG00000164463  
ENSG00000124749  
ENSG00000008300  
ENSG00000157445  
ENSG00000260103  
ENSG00000267419  
ENSG00000255471  
ENSG00000273038

ENSG00000102174  
ENSG00000154479  
ENSG00000156453  
ENSG00000230873  
ENSG00000170961  
ENSG00000249637  
ENSG00000214198  
ENSG00000169896  
ENSG00000134207  
ENSG00000133169  
ENSG00000138778  
ENSG00000236824  
ENSG00000155090  
ENSG00000140450  
ENSG00000218069  
ENSG00000140465  
ENSG00000260774  
ENSG00000182752  
ENSG00000121075  
ENSG00000231672  
ENSG00000175197  
ENSG00000224596  
ENSG00000164440  
ENSG00000104783  
ENSG00000173406  
ENSG00000256589  
ENSG00000179046  
ENSG00000249790  
ENSG00000273419  
ENSG00000038295  
ENSG00000151023  
ENSG00000165186  
ENSG00000108924  
ENSG00000100867  
ENSG00000111087  
ENSG00000164484  
ENSG00000183571  
ENSG00000204531

ENSG00000053918  
ENSG00000054116  
ENSG00000054118  
ENSG00000054179  
ENSG00000054267  
ENSG00000054356  
ENSG00000054392  
ENSG00000054523  
ENSG00000054598  
ENSG00000054611  
ENSG00000054654  
ENSG00000054690  
ENSG00000054793  
ENSG00000054796  
ENSG00000054965  
ENSG00000054967  
ENSG00000054983  
ENSG00000055070  
ENSG00000055118  
ENSG00000055147  
ENSG00000055163  
ENSG00000055332  
ENSG00000055483  
ENSG00000055609  
ENSG00000055732  
ENSG00000055917  
ENSG00000055950  
ENSG00000055955  
ENSG00000056277  
ENSG00000056291  
ENSG00000056487  
ENSG00000056558  
ENSG00000056736  
ENSG00000056972  
ENSG00000056998  
ENSG00000057019  
ENSG00000057252  
ENSG00000057294

ENSG00000236778  
ENSG00000254289  
ENSG00000270276  
ENSG00000270882  
ENSG00000274750  
ENSG00000124635  
ENSG00000214544  
ENSG00000180447  
ENSG00000130222  
ENSG00000116717  
ENSG00000054598  
ENSG00000125848  
ENSG00000102678  
ENSG00000165323  
ENSG00000283709  
ENSG00000044524  
ENSG00000128512  
ENSG00000224165  
ENSG00000276644  
ENSG00000259736  
ENSG00000215018  
ENSG00000254413  
ENSG00000159409  
ENSG00000123080  
ENSG00000164076  
ENSG00000106804  
ENSG00000163009  
ENSG00000214212  
ENSG00000143032  
ENSG00000150347  
ENSG00000103723  
ENSG00000163126  
ENSG00000215559  
ENSG00000101745  
ENSG00000170214  
ENSG00000150471  
ENSG00000185736  
ENSG00000165029

ENSG00000057593  
ENSG00000057608  
ENSG00000057657  
ENSG00000057663  
ENSG00000057704  
ENSG00000057757  
ENSG00000057935  
ENSG00000058056  
ENSG00000058063  
ENSG00000058085  
ENSG00000058091  
ENSG00000058262  
ENSG00000058272  
ENSG00000058335  
ENSG00000058404  
ENSG00000058453  
ENSG00000058600  
ENSG00000058668  
ENSG00000058673  
ENSG00000058729  
ENSG00000058799  
ENSG00000058804  
ENSG00000058866  
ENSG00000059122  
ENSG00000059145  
ENSG00000059377  
ENSG00000059378  
ENSG00000059728  
ENSG00000059758  
ENSG00000059769  
ENSG00000059804  
ENSG00000059915  
ENSG00000060069  
ENSG00000060138  
ENSG00000060140  
ENSG00000060237  
ENSG00000060339  
ENSG00000060491

ENSG00000272341  
ENSG00000251634  
ENSG00000248583  
ENSG00000279522  
ENSG00000232611  
ENSG00000279900  
ENSG00000266680  
ENSG00000263080  
ENSG00000251661  
ENSG00000214243  
ENSG00000240291  
ENSG00000271133  
ENSG00000258457  
ENSG00000229127  
ENSG00000204666  
ENSG00000267370  
ENSG00000263280  
ENSG00000249721  
ENSG00000255435  
ENSG00000237732  
ENSG00000249655  
ENSG00000259723  
ENSG00000240731  
ENSG00000272030  
ENSG00000237149  
ENSG00000152763  
ENSG00000182168  
ENSG00000133710  
ENSG00000134532  
ENSG00000124766  
ENSG00000176887  
ENSG00000148942  
ENSG00000139209  
ENSG00000106483  
ENSG00000152217  
ENSG00000243819  
ENSG00000268006  
ENSG00000164708

ENSG00000060558  
ENSG00000060566  
ENSG00000060656  
ENSG00000060709  
ENSG00000060718  
ENSG00000060749  
ENSG00000060971  
ENSG00000060982  
ENSG00000061273  
ENSG00000061337  
ENSG00000061455  
ENSG00000061492  
ENSG00000061676  
ENSG00000061794  
ENSG00000061918  
ENSG00000061938  
ENSG00000061987  
ENSG00000062038  
ENSG00000062096  
ENSG00000062194  
ENSG00000062282  
ENSG00000062370  
ENSG00000062485  
ENSG00000062582  
ENSG00000062598  
ENSG00000062650  
ENSG00000062716  
ENSG00000062725  
ENSG00000063015  
ENSG00000063046  
ENSG00000063127  
ENSG00000063169  
ENSG00000063176  
ENSG00000063241  
ENSG00000063244  
ENSG00000063245  
ENSG00000063322  
ENSG00000063438

ENSG00000049246  
ENSG000000189184  
ENSG000000185630  
ENSG000000085465  
ENSG000000099250  
ENSG000000247809  
ENSG000000176771  
ENSG000000143995  
ENSG000000130518  
ENSG000000267365  
ENSG000000090376  
ENSG000000196890  
ENSG000000187837  
ENSG000000134363  
ENSG000000168386  
ENSG000000196159  
ENSG000000116106  
ENSG000000242689  
ENSG000000240498  
ENSG000000129757  
ENSG000000150394  
ENSG000000272398  
ENSG000000234585  
ENSG000000133101  
ENSG000000179397  
ENSG000000167995  
ENSG000000162373  
ENSG000000258655  
ENSG000000259456  
ENSG000000270605  
ENSG000000279865  
ENSG000000255363  
ENSG000000236654  
ENSG000000250753  
ENSG000000273759  
ENSG000000214432  
ENSG000000279659  
ENSG000000272054

ENSG00000063587  
ENSG00000063601  
ENSG00000063660  
ENSG00000063761  
ENSG00000063854  
ENSG00000063978  
ENSG00000064042  
ENSG00000064102  
ENSG00000064115  
ENSG00000064195  
ENSG00000064199  
ENSG00000064201  
ENSG00000064205  
ENSG00000064218  
ENSG00000064225  
ENSG00000064300  
ENSG00000064309  
ENSG00000064313  
ENSG00000064393  
ENSG00000064419  
ENSG00000064545  
ENSG00000064547  
ENSG00000064601  
ENSG00000064607  
ENSG00000064651  
ENSG00000064652  
ENSG00000064655  
ENSG00000064666  
ENSG00000064687  
ENSG00000064692  
ENSG00000064726  
ENSG00000064763  
ENSG00000064961  
ENSG00000064989  
ENSG00000064995  
ENSG00000064999  
ENSG00000065029  
ENSG00000065054

ENSG00000280010  
ENSG00000026025  
ENSG00000181449  
ENSG00000198732  
ENSG00000149212  
ENSG00000257557  
ENSG00000170836  
ENSG00000151623  
ENSG00000237187  
ENSG00000165555  
ENSG00000169184  
ENSG00000255248  
ENSG00000183496  
ENSG00000233639  
ENSG00000123700  
ENSG00000233822  
ENSG00000236993  
ENSG00000128573  
ENSG00000228314  
ENSG00000183230  
ENSG00000168542  
ENSG00000213760  
ENSG00000261716  
ENSG00000251095  
ENSG00000220323  
ENSG00000203819  
ENSG00000270681  
ENSG00000257261  
ENSG00000230699  
ENSG00000234537  
ENSG00000056487  
ENSG00000262096  
ENSG00000181143  
ENSG00000233930  
ENSG00000099251  
ENSG00000180596  
ENSG00000265962  
ENSG00000107105

ENSG00000065060  
ENSG00000065135  
ENSG00000065150  
ENSG00000065183  
ENSG00000065243  
ENSG00000065308  
ENSG00000065320  
ENSG00000065325  
ENSG00000065328  
ENSG00000065357  
ENSG00000065361  
ENSG00000065457  
ENSG00000065491  
ENSG00000065518  
ENSG00000065526  
ENSG00000065534  
ENSG00000065559  
ENSG00000065600  
ENSG00000065609  
ENSG00000065613  
ENSG00000065615  
ENSG00000065618  
ENSG00000065665  
ENSG00000065675  
ENSG00000065717  
ENSG00000065802  
ENSG00000065809  
ENSG00000065833  
ENSG00000065882  
ENSG00000065883  
ENSG00000065911  
ENSG00000065923  
ENSG00000065970  
ENSG00000065978  
ENSG00000065989  
ENSG00000066027  
ENSG00000066032  
ENSG00000066044

ENSG00000164309  
ENSG00000095585  
ENSG00000141431  
ENSG00000154736  
ENSG00000272993  
ENSG00000229931  
ENSG00000267731  
ENSG00000248596  
ENSG00000165655  
ENSG00000265972  
ENSG00000092421  
ENSG00000253846  
ENSG00000188729  
ENSG00000134986  
ENSG00000015520  
ENSG00000138347  
ENSG00000144214  
ENSG00000181016  
ENSG00000148798  
ENSG00000164330  
ENSG00000158486  
ENSG00000082196  
ENSG00000213199  
ENSG00000274460  
ENSG00000271474  
ENSG00000225792  
ENSG00000255389  
ENSG00000272468  
ENSG00000139865  
ENSG00000019549  
ENSG00000115896  
ENSG00000169116  
ENSG00000175745  
ENSG00000078018  
ENSG00000203814  
ENSG00000184678  
ENSG00000196787  
ENSG00000174844

ENSG00000066084  
ENSG00000066117  
ENSG00000066135  
ENSG00000066136  
ENSG00000066185  
ENSG00000066230  
ENSG00000066248  
ENSG00000066294  
ENSG00000066322  
ENSG00000066382  
ENSG00000066405  
ENSG00000066422  
ENSG00000066427  
ENSG00000066468  
ENSG00000066557  
ENSG00000066583  
ENSG00000066629  
ENSG00000066654  
ENSG00000066697  
ENSG00000066735  
ENSG00000066739  
ENSG00000066777  
ENSG00000066813  
ENSG00000066827  
ENSG00000066855  
ENSG00000066923  
ENSG00000066926  
ENSG00000066933  
ENSG00000067048  
ENSG00000067057  
ENSG00000067064  
ENSG00000067066  
ENSG00000067082  
ENSG00000067113  
ENSG00000067141  
ENSG00000067167  
ENSG00000067177  
ENSG00000067182

ENSG00000135407  
ENSG00000186517  
ENSG00000270876  
ENSG00000137573  
ENSG00000070731  
ENSG00000178573  
ENSG00000180573  
ENSG00000087589  
ENSG00000224294  
ENSG00000278238  
ENSG00000250519  
ENSG00000284526  
ENSG00000283235  
ENSG00000272486  
ENSG00000260727  
ENSG00000075223  
ENSG00000113389  
ENSG00000163121  
ENSG00000182308  
ENSG00000145087  
ENSG00000188738  
ENSG00000164972  
ENSG00000261087  
ENSG00000143469  
ENSG00000257335  
ENSG00000158406  
ENSG00000158373  
ENSG00000132837  
ENSG00000276966  
ENSG00000274290  
ENSG00000188959  
ENSG00000268756  
ENSG00000169432  
ENSG00000237693  
ENSG00000159208  
ENSG00000115461  
ENSG00000171587  
ENSG00000187775

ENSG00000067191  
ENSG00000067208  
ENSG00000067221  
ENSG00000067225  
ENSG00000067369  
ENSG00000067445  
ENSG00000067533  
ENSG00000067560  
ENSG00000067596  
ENSG00000067606  
ENSG00000067646  
ENSG00000067715  
ENSG00000067798  
ENSG00000067836  
ENSG00000067840  
ENSG00000067842  
ENSG00000067955  
ENSG00000067992  
ENSG00000068001  
ENSG00000068024  
ENSG00000068028  
ENSG00000068078  
ENSG00000068097  
ENSG00000068305  
ENSG00000068308  
ENSG00000068323  
ENSG00000068354  
ENSG00000068366  
ENSG00000068383  
ENSG00000068394  
ENSG00000068400  
ENSG00000068489  
ENSG00000068615  
ENSG00000068650  
ENSG00000068654  
ENSG00000068697  
ENSG00000068724  
ENSG00000068745



ENSG00000113369  
ENSG00000166793  
ENSG00000188580  
ENSG00000273802  
ENSG00000233030  
ENSG00000171951  
ENSG00000126368  
ENSG00000139269  
ENSG00000183813  
ENSG00000234424  
ENSG00000015592  
ENSG00000132639  
ENSG00000256779  
ENSG00000144188  
ENSG00000144010  
ENSG00000204510  
ENSG00000284546  
ENSG00000144015  
ENSG00000284306  
ENSG00000250782  
ENSG00000182330  
ENSG00000277862  
ENSG00000283873  
ENSG00000284018  
ENSG00000229978  
ENSG00000283776  
ENSG00000235268  
ENSG00000250386  
ENSG00000283740  
ENSG00000236175  
ENSG00000189325  
ENSG00000150244  
ENSG00000284438  
ENSG00000204449  
ENSG00000168930  
ENSG00000157765  
ENSG00000249620  
ENSG00000233802

ENSG00000068781  
ENSG00000068796  
ENSG00000068878  
ENSG00000068885  
ENSG00000068903  
ENSG00000068912  
ENSG00000068971  
ENSG00000069020  
ENSG00000069122  
ENSG00000069188  
ENSG00000069248  
ENSG00000069275  
ENSG00000069329  
ENSG00000069345  
ENSG00000069399  
ENSG00000069424  
ENSG00000069493  
ENSG00000069667  
ENSG00000069696  
ENSG00000069702  
ENSG00000069812  
ENSG00000069869  
ENSG00000069956  
ENSG00000069966  
ENSG00000069974  
ENSG00000069998  
ENSG00000070010  
ENSG00000070018  
ENSG00000070019  
ENSG00000070061  
ENSG00000070081  
ENSG00000070087  
ENSG00000070159  
ENSG00000070182  
ENSG00000070190  
ENSG00000070214  
ENSG00000070269  
ENSG00000070366

ENSG00000223417  
ENSG00000237706  
ENSG00000251258  
ENSG00000204455  
ENSG00000269466  
ENSG00000249156  
ENSG00000257951  
ENSG00000189253  
ENSG00000225581  
ENSG00000180532  
ENSG00000116726  
ENSG00000166013  
ENSG00000204450  
ENSG00000254764  
ENSG00000182053  
ENSG00000268799  
ENSG00000106278  
ENSG00000236941  
ENSG00000255855

ENSG00000070367  
ENSG00000070371  
ENSG00000070404  
ENSG00000070413  
ENSG00000070423  
ENSG00000070444  
ENSG00000070476  
ENSG00000070495  
ENSG00000070540  
ENSG00000070610  
ENSG00000070614  
ENSG00000070718  
ENSG00000070729  
ENSG00000070731  
ENSG00000070759  
ENSG00000070778  
ENSG00000070785  
ENSG00000070808  
ENSG00000070814  
ENSG00000070831  
ENSG00000070882  
ENSG00000070886  
ENSG00000070915  
ENSG00000070950  
ENSG00000070961  
ENSG00000070985  
ENSG00000071051  
ENSG00000071054  
ENSG00000071073  
ENSG00000071082  
ENSG00000071127  
ENSG00000071189  
ENSG00000071205  
ENSG00000071242  
ENSG00000071243  
ENSG00000071246  
ENSG00000071282  
ENSG00000071462

ENSG00000071537  
ENSG00000071539  
ENSG00000071553  
ENSG00000071564  
ENSG00000071575  
ENSG00000071626  
ENSG00000071655  
ENSG00000071794  
ENSG00000071859  
ENSG00000071889  
ENSG00000071909  
ENSG00000071967  
ENSG00000071991  
ENSG00000071994  
ENSG00000072041  
ENSG00000072042  
ENSG00000072062  
ENSG00000072071  
ENSG00000072110  
ENSG00000072121  
ENSG00000072133  
ENSG00000072134  
ENSG00000072135  
ENSG00000072163  
ENSG00000072182  
ENSG00000072195  
ENSG00000072201  
ENSG00000072210  
ENSG00000072274  
ENSG00000072310  
ENSG00000072315  
ENSG00000072364  
ENSG00000072401  
ENSG00000072415  
ENSG00000072422  
ENSG00000072501  
ENSG00000072518  
ENSG00000072571

ENSG00000072609  
ENSG00000072657  
ENSG00000072682  
ENSG00000072694  
ENSG00000072736  
ENSG00000072778  
ENSG00000072786  
ENSG00000072803  
ENSG00000072832  
ENSG00000072840  
ENSG00000072849  
ENSG00000072858  
ENSG00000072864  
ENSG00000072952  
ENSG00000072954  
ENSG00000072958  
ENSG00000073008  
ENSG00000073060  
ENSG00000073067  
ENSG00000073150  
ENSG00000073282  
ENSG00000073331  
ENSG00000073350  
ENSG00000073417  
ENSG00000073464  
ENSG00000073536  
ENSG00000073578  
ENSG00000073584  
ENSG00000073605  
ENSG00000073614  
ENSG00000073670  
ENSG00000073711  
ENSG00000073734  
ENSG00000073754  
ENSG00000073792  
ENSG00000073803  
ENSG00000073849  
ENSG00000073861

ENSG00000073910  
ENSG00000073921  
ENSG00000073969  
ENSG00000074047  
ENSG00000074054  
ENSG00000074071  
ENSG00000074181  
ENSG00000074201  
ENSG00000074211  
ENSG00000074219  
ENSG00000074266  
ENSG00000074317  
ENSG00000074356  
ENSG00000074370  
ENSG00000074410  
ENSG00000074416  
ENSG00000074527  
ENSG00000074590  
ENSG00000074603  
ENSG00000074621  
ENSG00000074657  
ENSG00000074660  
ENSG00000074695  
ENSG00000074696  
ENSG00000074706  
ENSG00000074755  
ENSG00000074803  
ENSG00000074842  
ENSG00000074964  
ENSG00000074966  
ENSG00000075035  
ENSG00000075043  
ENSG00000075073  
ENSG00000075089  
ENSG00000075131  
ENSG00000075142  
ENSG00000075151  
ENSG00000075213

ENSG00000075223  
ENSG00000075234  
ENSG00000075239  
ENSG00000075240  
ENSG00000075275  
ENSG00000075290  
ENSG00000075292  
ENSG00000075303  
ENSG00000075336  
ENSG00000075340  
ENSG00000075388  
ENSG00000075391  
ENSG00000075399  
ENSG00000075407  
ENSG00000075420  
ENSG00000075426  
ENSG00000075461  
ENSG00000075539  
ENSG00000075618  
ENSG00000075624  
ENSG00000075651  
ENSG00000075711  
ENSG00000075785  
ENSG00000075790  
ENSG00000075826  
ENSG00000075856  
ENSG00000075891  
ENSG00000075975  
ENSG00000076053  
ENSG00000076067  
ENSG00000076108  
ENSG00000076248  
ENSG00000076258  
ENSG00000076321  
ENSG00000076344  
ENSG00000076351  
ENSG00000076356  
ENSG00000076382

ENSG00000076513  
ENSG00000076554  
ENSG00000076555  
ENSG00000076604  
ENSG00000076641  
ENSG00000076685  
ENSG00000076706  
ENSG00000076716  
ENSG00000076770  
ENSG00000076826  
ENSG00000076864  
ENSG00000076928  
ENSG00000076984  
ENSG00000077044  
ENSG00000077092  
ENSG00000077147  
ENSG00000077150  
ENSG00000077157  
ENSG00000077232  
ENSG00000077238  
ENSG00000077254  
ENSG00000077264  
ENSG00000077274  
ENSG00000077279  
ENSG00000077312  
ENSG00000077327  
ENSG00000077348  
ENSG00000077380  
ENSG00000077420  
ENSG00000077454  
ENSG00000077458  
ENSG00000077463  
ENSG00000077514  
ENSG00000077522  
ENSG00000077585  
ENSG00000077684  
ENSG00000077713  
ENSG00000077721

ENSG00000077782  
ENSG00000077800  
ENSG00000077935  
ENSG00000077942  
ENSG00000077943  
ENSG00000077984  
ENSG00000078018  
ENSG00000078043  
ENSG00000078053  
ENSG00000078061  
ENSG00000078070  
ENSG00000078081  
ENSG00000078098  
ENSG00000078114  
ENSG00000078124  
ENSG00000078140  
ENSG00000078177  
ENSG00000078237  
ENSG00000078246  
ENSG00000078269  
ENSG00000078295  
ENSG00000078304  
ENSG00000078328  
ENSG00000078369  
ENSG00000078399  
ENSG00000078401  
ENSG00000078403  
ENSG00000078487  
ENSG00000078549  
ENSG00000078589  
ENSG00000078668  
ENSG00000078674  
ENSG00000078687  
ENSG00000078699  
ENSG00000078725  
ENSG00000078747  
ENSG00000078795  
ENSG00000078804



ENSG00000078808  
ENSG00000078814  
ENSG00000078900  
ENSG00000078902  
ENSG00000078967  
ENSG00000079102  
ENSG00000079112  
ENSG00000079134  
ENSG00000079150  
ENSG00000079156  
ENSG00000079215  
ENSG00000079246  
ENSG00000079263  
ENSG00000079277  
ENSG00000079308  
ENSG00000079313  
ENSG00000079332  
ENSG00000079335  
ENSG00000079337  
ENSG00000079385  
ENSG00000079387  
ENSG00000079393  
ENSG00000079432  
ENSG00000079435  
ENSG00000079459  
ENSG00000079482  
ENSG00000079557  
ENSG00000079689  
ENSG00000079691  
ENSG00000079739  
ENSG00000079805  
ENSG00000079819  
ENSG00000079841  
ENSG00000079931  
ENSG00000079950  
ENSG00000079974  
ENSG00000079999  
ENSG00000080166

ENSG00000080189  
ENSG00000080200  
ENSG00000080224  
ENSG00000080293  
ENSG00000080298  
ENSG00000080345  
ENSG00000080371  
ENSG00000080493  
ENSG00000080503  
ENSG00000080511  
ENSG00000080546  
ENSG00000080561  
ENSG00000080572  
ENSG00000080573  
ENSG00000080603  
ENSG00000080644  
ENSG00000080802  
ENSG00000080815  
ENSG00000080819  
ENSG00000080822  
ENSG00000080824  
ENSG00000080839  
ENSG00000080845  
ENSG00000080854  
ENSG00000081014  
ENSG00000081019  
ENSG00000081026  
ENSG00000081041  
ENSG00000081052  
ENSG00000081059  
ENSG00000081087  
ENSG00000081138  
ENSG00000081148  
ENSG00000081154  
ENSG00000081177  
ENSG00000081181  
ENSG00000081189  
ENSG00000081248

ENSG00000081277  
ENSG00000081307  
ENSG00000081377  
ENSG00000081386  
ENSG00000081479  
ENSG00000081665  
ENSG00000081692  
ENSG00000081760  
ENSG00000081791  
ENSG00000081800  
ENSG00000081803  
ENSG00000081818  
ENSG00000081842  
ENSG00000081853  
ENSG00000081913  
ENSG00000081923  
ENSG00000081985  
ENSG00000082074  
ENSG00000082146  
ENSG00000082153  
ENSG00000082175  
ENSG00000082196  
ENSG00000082212  
ENSG00000082213  
ENSG00000082258  
ENSG00000082269  
ENSG00000082293  
ENSG00000082397  
ENSG00000082438  
ENSG00000082458  
ENSG00000082482  
ENSG00000082497  
ENSG00000082512  
ENSG00000082515  
ENSG00000082516  
ENSG00000082556  
ENSG00000082641  
ENSG00000082684

ENSG00000082701  
ENSG00000082781  
ENSG00000082805  
ENSG00000082898  
ENSG00000082996  
ENSG00000083067  
ENSG00000083099  
ENSG00000083123  
ENSG00000083168  
ENSG00000083223  
ENSG00000083290  
ENSG00000083307  
ENSG00000083312  
ENSG00000083444  
ENSG00000083454  
ENSG00000083520  
ENSG00000083635  
ENSG00000083642  
ENSG00000083720  
ENSG00000083799  
ENSG00000083812  
ENSG00000083814  
ENSG00000083817  
ENSG00000083828  
ENSG00000083838  
ENSG00000083844  
ENSG00000083857  
ENSG00000083896  
ENSG00000084070  
ENSG00000084072  
ENSG00000084073  
ENSG00000084090  
ENSG00000084093  
ENSG00000084110  
ENSG00000084112  
ENSG00000084207  
ENSG00000084234  
ENSG00000084444

ENSG00000084453  
ENSG00000084463  
ENSG00000084623  
ENSG00000084628  
ENSG00000084652  
ENSG00000084674  
ENSG00000084676  
ENSG00000084710  
ENSG00000084731  
ENSG00000084733  
ENSG00000084754  
ENSG00000084764  
ENSG00000084774  
ENSG00000085063  
ENSG00000085117  
ENSG00000085185  
ENSG00000085224  
ENSG00000085231  
ENSG00000085274  
ENSG00000085276  
ENSG00000085365  
ENSG00000085377  
ENSG00000085382  
ENSG00000085415  
ENSG00000085433  
ENSG00000085491  
ENSG00000085511  
ENSG00000085644  
ENSG00000085662  
ENSG00000085719  
ENSG00000085721  
ENSG00000085733  
ENSG00000085741  
ENSG00000085760  
ENSG00000085831  
ENSG00000085832  
ENSG00000085871  
ENSG00000085872

ENSG00000085978  
ENSG00000085982  
ENSG00000085998  
ENSG00000085999  
ENSG00000086061  
ENSG00000086062  
ENSG00000086065  
ENSG00000086102  
ENSG00000086159  
ENSG00000086189  
ENSG00000086200  
ENSG00000086232  
ENSG00000086289  
ENSG00000086300  
ENSG00000086475  
ENSG00000086544  
ENSG00000086548  
ENSG00000086570  
ENSG00000086589  
ENSG00000086598  
ENSG00000086619  
ENSG00000086666  
ENSG00000086712  
ENSG00000086717  
ENSG00000086730  
ENSG00000086758  
ENSG00000086827  
ENSG00000086848  
ENSG00000086967  
ENSG00000086991  
ENSG00000087008  
ENSG00000087053  
ENSG00000087076  
ENSG00000087085  
ENSG00000087086  
ENSG00000087088  
ENSG00000087095  
ENSG00000087111

ENSG00000087116  
ENSG00000087128  
ENSG00000087152  
ENSG00000087206  
ENSG00000087245  
ENSG00000087250  
ENSG00000087253  
ENSG00000087258  
ENSG00000087263  
ENSG00000087266  
ENSG00000087269  
ENSG00000087274  
ENSG00000087299  
ENSG00000087301  
ENSG00000087302  
ENSG00000087303  
ENSG00000087338  
ENSG00000087448  
ENSG00000087460  
ENSG00000087470  
ENSG00000087494  
ENSG00000087502  
ENSG00000087510  
ENSG00000087586  
ENSG00000087589  
ENSG00000087842  
ENSG00000087903  
ENSG00000087995  
ENSG00000088035  
ENSG00000088038  
ENSG00000088053  
ENSG00000088179  
ENSG00000088205  
ENSG00000088256  
ENSG00000088280  
ENSG00000088305  
ENSG00000088356  
ENSG00000088367

ENSG00000088386  
ENSG00000088387  
ENSG00000088448  
ENSG00000088538  
ENSG00000088543  
ENSG00000088726  
ENSG00000088756  
ENSG00000088766  
ENSG00000088782  
ENSG00000088808  
ENSG00000088812  
ENSG00000088826  
ENSG00000088827  
ENSG00000088832  
ENSG00000088833  
ENSG00000088836  
ENSG00000088854  
ENSG00000088876  
ENSG00000088881  
ENSG00000088888  
ENSG00000088899  
ENSG00000088926  
ENSG00000089006  
ENSG00000089012  
ENSG00000089041  
ENSG00000089050  
ENSG00000089057  
ENSG00000089060  
ENSG00000089063  
ENSG00000089094  
ENSG00000089101  
ENSG00000089116  
ENSG00000089123  
ENSG00000089154  
ENSG00000089159  
ENSG00000089163  
ENSG00000089169  
ENSG00000089177



ENSG00000089220  
ENSG00000089225  
ENSG00000089234  
ENSG00000089248  
ENSG00000089250  
ENSG00000089280  
ENSG00000089327  
ENSG00000089335  
ENSG00000089351  
ENSG00000089356  
ENSG00000089472  
ENSG00000089486  
ENSG00000089558  
ENSG00000089597  
ENSG00000089639  
ENSG00000089682  
ENSG00000089685  
ENSG00000089693  
ENSG00000089723  
ENSG00000089737  
ENSG00000089775  
ENSG00000089818  
ENSG00000089820  
ENSG00000089902  
ENSG00000089916  
ENSG00000090013  
ENSG00000090020  
ENSG00000090054  
ENSG00000090060  
ENSG00000090061  
ENSG00000090097  
ENSG00000090104  
ENSG00000090238  
ENSG00000090263  
ENSG00000090273  
ENSG00000090316  
ENSG00000090339  
ENSG00000090372

ENSG00000090376  
ENSG00000090382  
ENSG00000090432  
ENSG00000090447  
ENSG00000090470  
ENSG00000090487  
ENSG00000090512  
ENSG00000090520  
ENSG00000090530  
ENSG00000090534  
ENSG00000090554  
ENSG00000090565  
ENSG00000090581  
ENSG00000090612  
ENSG00000090615  
ENSG00000090659  
ENSG00000090661  
ENSG00000090674  
ENSG00000090686  
ENSG00000090776  
ENSG00000090857  
ENSG00000090863  
ENSG00000090889  
ENSG00000090924  
ENSG00000090932  
ENSG00000090971  
ENSG00000090975  
ENSG00000090989  
ENSG00000091073  
ENSG00000091127  
ENSG00000091129  
ENSG00000091137  
ENSG00000091138  
ENSG00000091140  
ENSG00000091164  
ENSG00000091181  
ENSG00000091262  
ENSG00000091317

ENSG00000091409  
ENSG00000091428  
ENSG00000091436  
ENSG00000091482  
ENSG00000091490  
ENSG00000091513  
ENSG00000091527  
ENSG00000091536  
ENSG00000091542  
ENSG00000091592  
ENSG00000091622  
ENSG00000091640  
ENSG00000091651  
ENSG00000091732  
ENSG00000091831  
ENSG00000091844  
ENSG00000091879  
ENSG00000091947  
ENSG00000091972  
ENSG00000091986  
ENSG00000092009  
ENSG00000092010  
ENSG00000092036  
ENSG00000092051  
ENSG00000092054  
ENSG00000092068  
ENSG00000092140  
ENSG00000092199  
ENSG00000092201  
ENSG00000092203  
ENSG00000092208  
ENSG00000092295  
ENSG00000092345  
ENSG00000092421  
ENSG00000092439  
ENSG00000092445  
ENSG00000092470  
ENSG00000092529

ENSG00000092531  
ENSG00000092607  
ENSG00000092820  
ENSG00000092841  
ENSG00000092847  
ENSG00000092853  
ENSG00000092871  
ENSG00000092929  
ENSG00000092931  
ENSG00000092964  
ENSG00000092969  
ENSG00000092978  
ENSG00000093000  
ENSG00000093072  
ENSG00000093144  
ENSG00000093167  
ENSG00000093183  
ENSG00000093217  
ENSG00000094631  
ENSG00000094755  
ENSG00000094841  
ENSG00000094880  
ENSG00000094916  
ENSG00000094963  
ENSG00000094975  
ENSG00000095015  
ENSG00000095066  
ENSG00000095110  
ENSG00000095139  
ENSG00000095203  
ENSG00000095209  
ENSG00000095261  
ENSG00000095303  
ENSG00000095319  
ENSG00000095321  
ENSG00000095383  
ENSG00000095397  
ENSG00000095485

ENSG00000095539  
ENSG00000095574  
ENSG00000095587  
ENSG00000095627  
ENSG00000095637  
ENSG00000095713  
ENSG00000095739  
ENSG00000095752  
ENSG00000095777  
ENSG00000095787  
ENSG00000095794  
ENSG00000095906  
ENSG00000095981  
ENSG00000096006  
ENSG00000096060  
ENSG00000096063  
ENSG00000096070  
ENSG00000096080  
ENSG00000096088  
ENSG00000096093  
ENSG00000096384  
ENSG00000096395  
ENSG00000096401  
ENSG00000096433  
ENSG00000096654  
ENSG00000096696  
ENSG00000096717  
ENSG00000096746  
ENSG00000096968  
ENSG00000096996  
ENSG00000097007  
ENSG00000097021  
ENSG00000097033  
ENSG00000097046  
ENSG00000097096  
ENSG00000099139  
ENSG00000099194  
ENSG00000099203

ENSG00000099204  
ENSG00000099219  
ENSG00000099246  
ENSG00000099250  
ENSG00000099256  
ENSG00000099282  
ENSG00000099284  
ENSG00000099290  
ENSG00000099308  
ENSG00000099326  
ENSG00000099331  
ENSG00000099337  
ENSG00000099364  
ENSG00000099365  
ENSG00000099377  
ENSG00000099381  
ENSG00000099385  
ENSG00000099399  
ENSG00000099617  
ENSG00000099622  
ENSG00000099624  
ENSG00000099625  
ENSG00000099715  
ENSG00000099783  
ENSG00000099785  
ENSG00000099800  
ENSG00000099804  
ENSG00000099810  
ENSG00000099812  
ENSG00000099814  
ENSG00000099817  
ENSG00000099834  
ENSG00000099840  
ENSG00000099849  
ENSG00000099860  
ENSG00000099864  
ENSG00000099866  
ENSG00000099875

ENSG00000099889  
ENSG00000099899  
ENSG00000099901  
ENSG00000099904  
ENSG00000099910  
ENSG00000099917  
ENSG00000099937  
ENSG00000099940  
ENSG00000099942  
ENSG00000099949  
ENSG00000099953  
ENSG00000099954  
ENSG00000099957  
ENSG00000099958  
ENSG00000099960  
ENSG00000099968  
ENSG00000099974  
ENSG00000099977  
ENSG00000099985  
ENSG00000099992  
ENSG00000099995  
ENSG00000099999  
ENSG00000100003  
ENSG00000100012  
ENSG00000100014  
ENSG00000100023  
ENSG00000100024  
ENSG00000100027  
ENSG00000100028  
ENSG00000100029  
ENSG00000100030  
ENSG00000100031  
ENSG00000100033  
ENSG00000100034  
ENSG00000100036  
ENSG00000100038  
ENSG00000100053  
ENSG00000100055

ENSG00000100056  
ENSG00000100060  
ENSG00000100065  
ENSG00000100068  
ENSG00000100075  
ENSG00000100077  
ENSG00000100078  
ENSG00000100083  
ENSG00000100084  
ENSG00000100095  
ENSG00000100099  
ENSG00000100100  
ENSG00000100105  
ENSG00000100106  
ENSG00000100109  
ENSG00000100116  
ENSG00000100121  
ENSG00000100124  
ENSG00000100129  
ENSG00000100138  
ENSG00000100139  
ENSG00000100142  
ENSG00000100146  
ENSG00000100147  
ENSG00000100150  
ENSG00000100151  
ENSG00000100154  
ENSG00000100156  
ENSG00000100162  
ENSG00000100167  
ENSG00000100170  
ENSG00000100196  
ENSG00000100197  
ENSG00000100201  
ENSG00000100206  
ENSG00000100207  
ENSG00000100209  
ENSG00000100211



ENSG00000100216  
ENSG00000100219  
ENSG00000100220  
ENSG00000100221  
ENSG00000100225  
ENSG00000100226  
ENSG00000100227  
ENSG00000100228  
ENSG00000100234  
ENSG00000100241  
ENSG00000100242  
ENSG00000100243  
ENSG00000100246  
ENSG00000100258  
ENSG00000100263  
ENSG00000100266  
ENSG00000100276  
ENSG00000100280  
ENSG00000100281  
ENSG00000100285  
ENSG00000100290  
ENSG00000100292  
ENSG00000100294  
ENSG00000100296  
ENSG00000100297  
ENSG00000100298  
ENSG00000100299  
ENSG00000100302  
ENSG00000100304  
ENSG00000100307  
ENSG00000100311  
ENSG00000100314  
ENSG00000100320  
ENSG00000100321  
ENSG00000100324  
ENSG00000100325  
ENSG00000100330  
ENSG00000100335

ENSG00000100336  
ENSG00000100341  
ENSG00000100342  
ENSG00000100344  
ENSG00000100345  
ENSG00000100346  
ENSG00000100348  
ENSG00000100350  
ENSG00000100351  
ENSG00000100353  
ENSG00000100354  
ENSG00000100362  
ENSG00000100364  
ENSG00000100365  
ENSG00000100368  
ENSG00000100372  
ENSG00000100373  
ENSG00000100376  
ENSG00000100379  
ENSG00000100380  
ENSG00000100385  
ENSG00000100393  
ENSG00000100395  
ENSG00000100399  
ENSG00000100401  
ENSG00000100403  
ENSG00000100410  
ENSG00000100413  
ENSG00000100417  
ENSG00000100418  
ENSG00000100422  
ENSG00000100425  
ENSG00000100427  
ENSG00000100433  
ENSG00000100439  
ENSG00000100441  
ENSG00000100442  
ENSG00000100445

ENSG00000100450  
ENSG00000100453  
ENSG00000100461  
ENSG00000100462  
ENSG00000100478  
ENSG00000100483  
ENSG00000100485  
ENSG00000100490  
ENSG00000100503  
ENSG00000100505  
ENSG00000100522  
ENSG00000100523  
ENSG00000100528  
ENSG00000100554  
ENSG00000100557  
ENSG00000100558  
ENSG00000100564  
ENSG00000100568  
ENSG00000100577  
ENSG00000100578  
ENSG00000100592  
ENSG00000100593  
ENSG00000100596  
ENSG00000100599  
ENSG00000100600  
ENSG00000100601  
ENSG00000100603  
ENSG00000100604  
ENSG00000100605  
ENSG00000100612  
ENSG00000100614  
ENSG00000100625  
ENSG00000100626  
ENSG00000100628  
ENSG00000100629  
ENSG00000100644  
ENSG00000100647  
ENSG00000100650

ENSG00000100664  
ENSG00000100665  
ENSG00000100678  
ENSG00000100697  
ENSG00000100711  
ENSG00000100721  
ENSG00000100722  
ENSG00000100726  
ENSG00000100731  
ENSG00000100744  
ENSG00000100767  
ENSG00000100784  
ENSG00000100796  
ENSG00000100802  
ENSG00000100804  
ENSG00000100811  
ENSG00000100813  
ENSG00000100815  
ENSG00000100836  
ENSG00000100842  
ENSG00000100852  
ENSG00000100865  
ENSG00000100867  
ENSG00000100884  
ENSG00000100888  
ENSG00000100889  
ENSG00000100890  
ENSG00000100897  
ENSG00000100906  
ENSG00000100916  
ENSG00000100926  
ENSG00000100938  
ENSG00000100941  
ENSG00000100949  
ENSG00000100968  
ENSG00000100983  
ENSG00000100987  
ENSG00000100991

ENSG00000100994  
ENSG00000100997  
ENSG00000101003  
ENSG00000101004  
ENSG00000101017  
ENSG00000101019  
ENSG00000101040  
ENSG00000101049  
ENSG00000101057  
ENSG00000101076  
ENSG00000101079  
ENSG00000101082  
ENSG00000101084  
ENSG00000101096  
ENSG00000101098  
ENSG00000101109  
ENSG00000101115  
ENSG00000101126  
ENSG00000101132  
ENSG00000101134  
ENSG00000101138  
ENSG00000101144  
ENSG00000101146  
ENSG00000101150  
ENSG00000101152  
ENSG00000101158  
ENSG00000101162  
ENSG00000101166  
ENSG00000101180  
ENSG00000101181  
ENSG00000101187  
ENSG00000101188  
ENSG00000101189  
ENSG00000101191  
ENSG00000101193  
ENSG00000101194  
ENSG00000101199  
ENSG00000101203

ENSG00000101204  
ENSG00000101213  
ENSG00000101216  
ENSG00000101220  
ENSG00000101224  
ENSG00000101230  
ENSG00000101236  
ENSG00000101246  
ENSG00000101247  
ENSG00000101251  
ENSG00000101255  
ENSG00000101265  
ENSG00000101266  
ENSG00000101276  
ENSG00000101280  
ENSG00000101282  
ENSG00000101290  
ENSG00000101292  
ENSG00000101294  
ENSG00000101298  
ENSG00000101306  
ENSG00000101307  
ENSG00000101310  
ENSG00000101311  
ENSG00000101323  
ENSG00000101327  
ENSG00000101331  
ENSG00000101333  
ENSG00000101335  
ENSG00000101337  
ENSG00000101342  
ENSG00000101343  
ENSG00000101346  
ENSG00000101347  
ENSG00000101350  
ENSG00000101353  
ENSG00000101361  
ENSG00000101363

ENSG00000101365  
ENSG00000101367  
ENSG00000101384  
ENSG00000101391  
ENSG00000101412  
ENSG00000101413  
ENSG00000101417  
ENSG00000101421  
ENSG00000101438  
ENSG00000101439  
ENSG00000101440  
ENSG00000101441  
ENSG00000101442  
ENSG00000101443  
ENSG00000101444  
ENSG00000101445  
ENSG00000101446  
ENSG00000101448  
ENSG00000101452  
ENSG00000101457  
ENSG00000101460  
ENSG00000101463  
ENSG00000101464  
ENSG00000101470  
ENSG00000101474  
ENSG00000101489  
ENSG00000101493  
ENSG00000101542  
ENSG00000101544  
ENSG00000101546  
ENSG00000101557  
ENSG00000101558  
ENSG00000101574  
ENSG00000101577  
ENSG00000101624  
ENSG00000101638  
ENSG00000101654  
ENSG00000101665

ENSG00000101670  
ENSG00000101680  
ENSG00000101695  
ENSG00000101745  
ENSG00000101746  
ENSG00000101751  
ENSG00000101752  
ENSG00000101773  
ENSG00000101782  
ENSG00000101811  
ENSG00000101812  
ENSG00000101825  
ENSG00000101842  
ENSG00000101844  
ENSG00000101846  
ENSG00000101849  
ENSG00000101850  
ENSG00000101868  
ENSG00000101871  
ENSG00000101888  
ENSG00000101892  
ENSG00000101901  
ENSG00000101911  
ENSG00000101916  
ENSG00000101928  
ENSG00000101935  
ENSG00000101938  
ENSG00000101945  
ENSG00000101951  
ENSG00000101958  
ENSG00000101966  
ENSG00000101972  
ENSG00000101974  
ENSG00000101981  
ENSG00000101986  
ENSG00000102003  
ENSG00000102007  
ENSG00000102021



ENSG00000102024  
ENSG00000102030  
ENSG00000102034  
ENSG00000102043  
ENSG00000102048  
ENSG00000102053  
ENSG00000102054  
ENSG00000102076  
ENSG00000102078  
ENSG00000102081  
ENSG00000102096  
ENSG00000102098  
ENSG00000102100  
ENSG00000102104  
ENSG00000102119  
ENSG00000102125  
ENSG00000102144  
ENSG00000102145  
ENSG00000102158  
ENSG00000102172  
ENSG00000102174  
ENSG00000102178  
ENSG00000102181  
ENSG00000102189  
ENSG00000102218  
ENSG00000102221  
ENSG00000102225  
ENSG00000102226  
ENSG00000102230  
ENSG00000102245  
ENSG00000102271  
ENSG00000102287  
ENSG00000102290  
ENSG00000102309  
ENSG00000102312  
ENSG00000102313  
ENSG00000102316  
ENSG00000102317

ENSG00000102349  
ENSG00000102359  
ENSG00000102362  
ENSG00000102383  
ENSG00000102384  
ENSG00000102385  
ENSG00000102387  
ENSG00000102401  
ENSG00000102409  
ENSG00000102445  
ENSG00000102452  
ENSG00000102466  
ENSG00000102468  
ENSG00000102524  
ENSG00000102531  
ENSG00000102543  
ENSG00000102547  
ENSG00000102554  
ENSG00000102572  
ENSG00000102580  
ENSG00000102606  
ENSG00000102678  
ENSG00000102683  
ENSG00000102710  
ENSG00000102743  
ENSG00000102753  
ENSG00000102755  
ENSG00000102760  
ENSG00000102763  
ENSG00000102780  
ENSG00000102781  
ENSG00000102786  
ENSG00000102794  
ENSG00000102796  
ENSG00000102802  
ENSG00000102804  
ENSG00000102837  
ENSG00000102858

ENSG00000102870  
ENSG00000102871  
ENSG00000102878  
ENSG00000102882  
ENSG00000102893  
ENSG00000102897  
ENSG00000102898  
ENSG00000102908  
ENSG00000102910  
ENSG00000102921  
ENSG00000102924  
ENSG00000102931  
ENSG00000102934  
ENSG00000102935  
ENSG00000102962  
ENSG00000102967  
ENSG00000102970  
ENSG00000102974  
ENSG00000102977  
ENSG00000102978  
ENSG00000102984  
ENSG00000102996  
ENSG00000103005  
ENSG00000103018  
ENSG00000103021  
ENSG00000103024  
ENSG00000103034  
ENSG00000103035  
ENSG00000103042  
ENSG00000103044  
ENSG00000103047  
ENSG00000103051  
ENSG00000103056  
ENSG00000103061  
ENSG00000103064  
ENSG00000103066  
ENSG00000103067  
ENSG00000103089

ENSG00000103091  
ENSG00000103111  
ENSG00000103121  
ENSG00000103126  
ENSG00000103145  
ENSG00000103148  
ENSG00000103150  
ENSG00000103154  
ENSG00000103160  
ENSG00000103168  
ENSG00000103174  
ENSG00000103175  
ENSG00000103184  
ENSG00000103187  
ENSG00000103194  
ENSG00000103196  
ENSG00000103199  
ENSG00000103202  
ENSG00000103222  
ENSG00000103226  
ENSG00000103241  
ENSG00000103245  
ENSG00000103248  
ENSG00000103253  
ENSG00000103257  
ENSG00000103260  
ENSG00000103264  
ENSG00000103266  
ENSG00000103269  
ENSG00000103274  
ENSG00000103275  
ENSG00000103313  
ENSG00000103319  
ENSG00000103326  
ENSG00000103342  
ENSG00000103343  
ENSG00000103351  
ENSG00000103353

ENSG00000103355  
ENSG00000103356  
ENSG00000103363  
ENSG00000103365  
ENSG00000103375  
ENSG00000103381  
ENSG00000103404  
ENSG00000103415  
ENSG00000103423  
ENSG00000103449  
ENSG00000103460  
ENSG00000103479  
ENSG00000103485  
ENSG00000103489  
ENSG00000103494  
ENSG00000103495  
ENSG00000103496  
ENSG00000103502  
ENSG00000103507  
ENSG00000103510  
ENSG00000103512  
ENSG00000103522  
ENSG00000103528  
ENSG00000103534  
ENSG00000103540  
ENSG00000103546  
ENSG00000103549  
ENSG00000103550  
ENSG00000103569  
ENSG00000103591  
ENSG00000103599  
ENSG00000103642  
ENSG00000103647  
ENSG00000103653  
ENSG00000103657  
ENSG00000103707  
ENSG00000103710  
ENSG00000103723

ENSG00000103740  
ENSG00000103742  
ENSG00000103769  
ENSG00000103852  
ENSG00000103855  
ENSG00000103876  
ENSG00000103888  
ENSG00000103932  
ENSG00000103942  
ENSG00000103966  
ENSG00000103978  
ENSG00000103994  
ENSG00000103995  
ENSG00000104043  
ENSG00000104044  
ENSG00000104047  
ENSG00000104055  
ENSG00000104059  
ENSG00000104064  
ENSG00000104067  
ENSG00000104081  
ENSG00000104093  
ENSG00000104112  
ENSG00000104131  
ENSG00000104140  
ENSG00000104142  
ENSG00000104147  
ENSG00000104154  
ENSG00000104164  
ENSG00000104177  
ENSG00000104205  
ENSG00000104213  
ENSG00000104218  
ENSG00000104219  
ENSG00000104221  
ENSG00000104228  
ENSG00000104231  
ENSG00000104237

ENSG00000104267  
ENSG00000104290  
ENSG00000104299  
ENSG00000104312  
ENSG00000104313  
ENSG00000104320  
ENSG00000104321  
ENSG00000104327  
ENSG00000104331  
ENSG00000104332  
ENSG00000104341  
ENSG00000104343  
ENSG00000104356  
ENSG00000104361  
ENSG00000104365  
ENSG00000104368  
ENSG00000104369  
ENSG00000104375  
ENSG00000104381  
ENSG00000104388  
ENSG00000104413  
ENSG00000104415  
ENSG00000104419  
ENSG00000104427  
ENSG00000104432  
ENSG00000104435  
ENSG00000104442  
ENSG00000104447  
ENSG00000104450  
ENSG00000104472  
ENSG00000104490  
ENSG00000104497  
ENSG00000104499  
ENSG00000104517  
ENSG00000104524  
ENSG00000104529  
ENSG00000104611  
ENSG00000104626

ENSG00000104635  
ENSG00000104643  
ENSG00000104660  
ENSG00000104671  
ENSG00000104687  
ENSG00000104691  
ENSG00000104695  
ENSG00000104722  
ENSG00000104723  
ENSG00000104728  
ENSG00000104731  
ENSG00000104738  
ENSG00000104760  
ENSG00000104763  
ENSG00000104765  
ENSG00000104783  
ENSG00000104805  
ENSG00000104812  
ENSG00000104814  
ENSG00000104824  
ENSG00000104833  
ENSG00000104835  
ENSG00000104848  
ENSG00000104853  
ENSG00000104856  
ENSG00000104859  
ENSG00000104866  
ENSG00000104870  
ENSG00000104880  
ENSG00000104881  
ENSG00000104884  
ENSG00000104885  
ENSG00000104886  
ENSG00000104888  
ENSG00000104889  
ENSG00000104894  
ENSG00000104897  
ENSG00000104903



ENSG00000104915  
ENSG00000104921  
ENSG00000104936  
ENSG00000104938  
ENSG00000104941  
ENSG00000104953  
ENSG00000104957  
ENSG00000104964  
ENSG00000104967  
ENSG00000104969  
ENSG00000104972  
ENSG00000104974  
ENSG00000104976  
ENSG00000104979  
ENSG00000104998  
ENSG00000105011  
ENSG00000105053  
ENSG00000105058  
ENSG00000105063  
ENSG00000105072  
ENSG00000105085  
ENSG00000105088  
ENSG00000105122  
ENSG00000105127  
ENSG00000105131  
ENSG00000105135  
ENSG00000105136  
ENSG00000105137  
ENSG00000105141  
ENSG00000105143  
ENSG00000105146  
ENSG00000105171  
ENSG00000105173  
ENSG00000105185  
ENSG00000105186  
ENSG00000105197  
ENSG00000105204  
ENSG00000105205

ENSG00000105219  
ENSG00000105220  
ENSG00000105221  
ENSG00000105227  
ENSG00000105229  
ENSG00000105245  
ENSG00000105278  
ENSG00000105281  
ENSG00000105287  
ENSG00000105298  
ENSG00000105321  
ENSG00000105323  
ENSG00000105325  
ENSG00000105327  
ENSG00000105329  
ENSG00000105339  
ENSG00000105341  
ENSG00000105355  
ENSG00000105357  
ENSG00000105364  
ENSG00000105366  
ENSG00000105369  
ENSG00000105370  
ENSG00000105376  
ENSG00000105388  
ENSG00000105392  
ENSG00000105397  
ENSG00000105398  
ENSG00000105401  
ENSG00000105402  
ENSG00000105409  
ENSG00000105426  
ENSG00000105428  
ENSG00000105429  
ENSG00000105438  
ENSG00000105443  
ENSG00000105447  
ENSG00000105464

ENSG00000105467  
ENSG00000105472  
ENSG00000105483  
ENSG00000105492  
ENSG00000105497  
ENSG00000105499  
ENSG00000105507  
ENSG00000105509  
ENSG00000105514  
ENSG00000105519  
ENSG00000105520  
ENSG00000105549  
ENSG00000105549  
ENSG00000105556  
ENSG00000105568  
ENSG00000105576  
ENSG00000105605  
ENSG00000105607  
ENSG00000105609  
ENSG00000105610  
ENSG00000105612  
ENSG00000105618  
ENSG00000105639  
ENSG00000105641  
ENSG00000105642  
ENSG00000105643  
ENSG00000105647  
ENSG00000105649  
ENSG00000105650  
ENSG00000105656  
ENSG00000105662  
ENSG00000105664  
ENSG00000105668  
ENSG00000105669  
ENSG00000105671  
ENSG00000105675  
ENSG00000105676  
ENSG00000105695  
ENSG00000105696

ENSG00000105698  
ENSG00000105700  
ENSG00000105701  
ENSG00000105711  
ENSG00000105717  
ENSG00000105722  
ENSG00000105723  
ENSG00000105732  
ENSG00000105737  
ENSG00000105738  
ENSG00000105750  
ENSG00000105755  
ENSG00000105767  
ENSG00000105771  
ENSG00000105778  
ENSG00000105784  
ENSG00000105792  
ENSG00000105793  
ENSG00000105808  
ENSG00000105810  
ENSG00000105819  
ENSG00000105825  
ENSG00000105835  
ENSG00000105849  
ENSG00000105851  
ENSG00000105854  
ENSG00000105855  
ENSG00000105856  
ENSG00000105865  
ENSG00000105866  
ENSG00000105875  
ENSG00000105877  
ENSG00000105879  
ENSG00000105887  
ENSG00000105889  
ENSG00000105926  
ENSG00000105928  
ENSG00000105939

ENSG00000105948  
ENSG00000105953  
ENSG00000105963  
ENSG00000105967  
ENSG00000105968  
ENSG00000105971  
ENSG00000105974  
ENSG00000105976  
ENSG00000105982  
ENSG00000105983  
ENSG00000105989  
ENSG00000105991  
ENSG00000105993  
ENSG00000105996  
ENSG00000105997  
ENSG00000106003  
ENSG00000106004  
ENSG00000106009  
ENSG00000106012  
ENSG00000106018  
ENSG00000106025  
ENSG00000106038  
ENSG00000106052  
ENSG00000106069  
ENSG00000106070  
ENSG00000106077  
ENSG00000106078  
ENSG00000106080  
ENSG00000106086  
ENSG00000106089  
ENSG00000106100  
ENSG00000106113  
ENSG00000106123  
ENSG00000106125  
ENSG00000106144  
ENSG00000106178  
ENSG00000106236  
ENSG00000106244

ENSG00000106245  
ENSG00000106246  
ENSG00000106261  
ENSG00000106263  
ENSG00000106266  
ENSG00000106268  
ENSG00000106290  
ENSG00000106299  
ENSG00000106302  
ENSG00000106304  
ENSG00000106327  
ENSG00000106331  
ENSG00000106341  
ENSG00000106344  
ENSG00000106348  
ENSG00000106351  
ENSG00000106355  
ENSG00000106366  
ENSG00000106367  
ENSG00000106392  
ENSG00000106397  
ENSG00000106399  
ENSG00000106400  
ENSG00000106404  
ENSG00000106410  
ENSG00000106415  
ENSG00000106436  
ENSG00000106459  
ENSG00000106460  
ENSG00000106462  
ENSG00000106477  
ENSG00000106479  
ENSG00000106483  
ENSG00000106484  
ENSG00000106511  
ENSG00000106524  
ENSG00000106526  
ENSG00000106537

ENSG00000106546  
ENSG00000106554  
ENSG00000106571  
ENSG00000106603  
ENSG00000106608  
ENSG00000106609  
ENSG00000106615  
ENSG00000106617  
ENSG00000106624  
ENSG00000106628  
ENSG00000106631  
ENSG00000106633  
ENSG00000106635  
ENSG00000106636  
ENSG00000106638  
ENSG00000106665  
ENSG00000106682  
ENSG00000106683  
ENSG00000106686  
ENSG00000106688  
ENSG00000106692  
ENSG00000106701  
ENSG00000106714  
ENSG00000106723  
ENSG00000106733  
ENSG00000106771  
ENSG00000106772  
ENSG00000106780  
ENSG00000106785  
ENSG00000106789  
ENSG00000106799  
ENSG00000106804  
ENSG00000106809  
ENSG00000106819  
ENSG00000106823  
ENSG00000106829  
ENSG00000106852  
ENSG00000106853

ENSG00000106868  
ENSG00000106948  
ENSG00000106952  
ENSG00000106976  
ENSG00000106991  
ENSG00000106992  
ENSG00000106993  
ENSG00000107021  
ENSG00000107099  
ENSG00000107104  
ENSG00000107105  
ENSG00000107130  
ENSG00000107140  
ENSG00000107147  
ENSG00000107159  
ENSG00000107164  
ENSG00000107185  
ENSG00000107186  
ENSG00000107187  
ENSG00000107201  
ENSG00000107223  
ENSG00000107242  
ENSG00000107249  
ENSG00000107262  
ENSG00000107263  
ENSG00000107281  
ENSG00000107282  
ENSG00000107290  
ENSG00000107295  
ENSG00000107338  
ENSG00000107341  
ENSG00000107362  
ENSG00000107371  
ENSG00000107372  
ENSG00000107404  
ENSG00000107443  
ENSG00000107447  
ENSG00000107518



ENSG00000107521  
ENSG00000107551  
ENSG00000107554  
ENSG00000107560  
ENSG00000107562  
ENSG00000107566  
ENSG00000107581  
ENSG00000107593  
ENSG00000107611  
ENSG00000107614  
ENSG00000107643  
ENSG00000107651  
ENSG00000107669  
ENSG00000107679  
ENSG00000107719  
ENSG00000107731  
ENSG00000107736  
ENSG00000107738  
ENSG00000107742  
ENSG00000107745  
ENSG00000107758  
ENSG00000107771  
ENSG00000107779  
ENSG00000107789  
ENSG00000107798  
ENSG00000107807  
ENSG00000107815  
ENSG00000107816  
ENSG00000107819  
ENSG00000107821  
ENSG00000107829  
ENSG00000107831  
ENSG00000107833  
ENSG00000107854  
ENSG00000107862  
ENSG00000107863  
ENSG00000107864  
ENSG00000107874

ENSG00000107882  
ENSG00000107890  
ENSG00000107897  
ENSG00000107902  
ENSG00000107929  
ENSG00000107937  
ENSG00000107938  
ENSG00000107949  
ENSG00000107951  
ENSG00000107954  
ENSG00000107957  
ENSG00000107960  
ENSG00000107984  
ENSG00000108001  
ENSG00000108018  
ENSG00000108039  
ENSG00000108061  
ENSG00000108064  
ENSG00000108091  
ENSG00000108094  
ENSG00000108100  
ENSG00000108107  
ENSG00000108175  
ENSG00000108176  
ENSG00000108179  
ENSG00000108187  
ENSG00000108219  
ENSG00000108231  
ENSG00000108239  
ENSG00000108242  
ENSG00000108256  
ENSG00000108262  
ENSG00000108306  
ENSG00000108309  
ENSG00000108312  
ENSG00000108342  
ENSG00000108344  
ENSG00000108349

ENSG00000108352  
ENSG00000108370  
ENSG00000108375  
ENSG00000108379  
ENSG00000108381  
ENSG00000108387  
ENSG00000108389  
ENSG00000108395  
ENSG00000108405  
ENSG00000108417  
ENSG00000108423  
ENSG00000108424  
ENSG00000108439  
ENSG00000108443  
ENSG00000108448  
ENSG00000108465  
ENSG00000108468  
ENSG00000108469  
ENSG00000108474  
ENSG00000108506  
ENSG00000108509  
ENSG00000108510  
ENSG00000108511  
ENSG00000108523  
ENSG00000108528  
ENSG00000108551  
ENSG00000108556  
ENSG00000108557  
ENSG00000108559  
ENSG00000108561  
ENSG00000108576  
ENSG00000108578  
ENSG00000108582  
ENSG00000108587  
ENSG00000108588  
ENSG00000108590  
ENSG00000108591  
ENSG00000108592

ENSG00000108599  
ENSG00000108604  
ENSG00000108622  
ENSG00000108639  
ENSG00000108641  
ENSG00000108651  
ENSG00000108654  
ENSG00000108666  
ENSG00000108669  
ENSG00000108671  
ENSG00000108679  
ENSG00000108684  
ENSG00000108691  
ENSG00000108702  
ENSG00000108733  
ENSG00000108759  
ENSG00000108773  
ENSG00000108774  
ENSG00000108784  
ENSG00000108786  
ENSG00000108788  
ENSG00000108797  
ENSG00000108798  
ENSG00000108799  
ENSG00000108813  
ENSG00000108819  
ENSG00000108821  
ENSG00000108828  
ENSG00000108829  
ENSG00000108830  
ENSG00000108840  
ENSG00000108846  
ENSG00000108848  
ENSG00000108852  
ENSG00000108854  
ENSG00000108861  
ENSG00000108878  
ENSG00000108883

ENSG00000108924  
ENSG00000108932  
ENSG00000108946  
ENSG00000108947  
ENSG00000108950  
ENSG00000108960  
ENSG00000108961  
ENSG00000108963  
ENSG00000108984  
ENSG00000109016  
ENSG00000109046  
ENSG00000109062  
ENSG00000109065  
ENSG00000109066  
ENSG00000109079  
ENSG00000109083  
ENSG00000109084  
ENSG00000109089  
ENSG00000109099  
ENSG00000109101  
ENSG00000109103  
ENSG00000109107  
ENSG00000109111  
ENSG00000109113  
ENSG00000109118  
ENSG00000109132  
ENSG00000109133  
ENSG00000109158  
ENSG00000109163  
ENSG00000109171  
ENSG00000109180  
ENSG00000109181  
ENSG00000109184  
ENSG00000109189  
ENSG00000109193  
ENSG00000109205  
ENSG00000109220  
ENSG00000109265

ENSG00000109270  
ENSG00000109321  
ENSG00000109323  
ENSG00000109332  
ENSG00000109339  
ENSG00000109381  
ENSG00000109390  
ENSG00000109452  
ENSG00000109458  
ENSG00000109466  
ENSG00000109471  
ENSG00000109475  
ENSG00000109501  
ENSG00000109519  
ENSG00000109534  
ENSG00000109572  
ENSG00000109576  
ENSG00000109586  
ENSG00000109610  
ENSG00000109618  
ENSG00000109654  
ENSG00000109670  
ENSG00000109680  
ENSG00000109684  
ENSG00000109685  
ENSG00000109686  
ENSG00000109689  
ENSG00000109705  
ENSG00000109736  
ENSG00000109756  
ENSG00000109771  
ENSG00000109787  
ENSG00000109790  
ENSG00000109794  
ENSG00000109805  
ENSG00000109819  
ENSG00000109832  
ENSG00000109854

ENSG00000109861  
ENSG00000109881  
ENSG00000109917  
ENSG00000109919  
ENSG00000109920  
ENSG00000109929  
ENSG00000109943  
ENSG00000109944  
ENSG00000109956  
ENSG00000110002  
ENSG00000110013  
ENSG00000110025  
ENSG00000110042  
ENSG00000110046  
ENSG00000110047  
ENSG00000110048  
ENSG00000110057  
ENSG00000110066  
ENSG00000110074  
ENSG00000110075  
ENSG00000110076  
ENSG00000110077  
ENSG00000110079  
ENSG00000110080  
ENSG00000110090  
ENSG00000110092  
ENSG00000110104  
ENSG00000110107  
ENSG00000110108  
ENSG00000110148  
ENSG00000110171  
ENSG00000110172  
ENSG00000110237  
ENSG00000110243  
ENSG00000110245  
ENSG00000110274  
ENSG00000110315  
ENSG00000110318

ENSG00000110324  
ENSG00000110344  
ENSG00000110367  
ENSG00000110375  
ENSG00000110395  
ENSG00000110400  
ENSG00000110422  
ENSG00000110427  
ENSG00000110429  
ENSG00000110436  
ENSG00000110442  
ENSG00000110448  
ENSG00000110492  
ENSG00000110497  
ENSG00000110514  
ENSG00000110536  
ENSG00000110583  
ENSG00000110619  
ENSG00000110660  
ENSG00000110665  
ENSG00000110675  
ENSG00000110680  
ENSG00000110693  
ENSG00000110696  
ENSG00000110697  
ENSG00000110713  
ENSG00000110719  
ENSG00000110721  
ENSG00000110723  
ENSG00000110756  
ENSG00000110768  
ENSG00000110777  
ENSG00000110786  
ENSG00000110801  
ENSG00000110841  
ENSG00000110848  
ENSG00000110851  
ENSG00000110852



ENSG00000110871  
ENSG00000110876  
ENSG00000110880  
ENSG00000110881  
ENSG00000110888  
ENSG00000110900  
ENSG00000110906  
ENSG00000110911  
ENSG00000110917  
ENSG00000110921  
ENSG00000110925  
ENSG00000110931  
ENSG00000110934  
ENSG00000110944  
ENSG00000110958  
ENSG00000110987  
ENSG00000111011  
ENSG00000111012  
ENSG00000111049  
ENSG00000111052  
ENSG00000111057  
ENSG00000111058  
ENSG00000111110  
ENSG00000111142  
ENSG00000111144  
ENSG00000111145  
ENSG00000111181  
ENSG00000111186  
ENSG00000111196  
ENSG00000111203  
ENSG00000111206  
ENSG00000111218  
ENSG00000111224  
ENSG00000111229  
ENSG00000111231  
ENSG00000111241  
ENSG00000111247  
ENSG00000111249

ENSG00000111252  
ENSG00000111261  
ENSG00000111262  
ENSG00000111266  
ENSG00000111269  
ENSG00000111275  
ENSG00000111276  
ENSG00000111300  
ENSG00000111305  
ENSG00000111319  
ENSG00000111321  
ENSG00000111325  
ENSG00000111328  
ENSG00000111331  
ENSG00000111335  
ENSG00000111341  
ENSG00000111344  
ENSG00000111348  
ENSG00000111358  
ENSG00000111361  
ENSG00000111364  
ENSG00000111371  
ENSG00000111405  
ENSG00000111412  
ENSG00000111424  
ENSG00000111432  
ENSG00000111445  
ENSG00000111450  
ENSG00000111452  
ENSG00000111481  
ENSG00000111490  
ENSG00000111530  
ENSG00000111537  
ENSG00000111540  
ENSG00000111554  
ENSG00000111596  
ENSG00000111602  
ENSG00000111605

ENSG00000111639  
ENSG00000111641  
ENSG00000111642  
ENSG00000111647  
ENSG00000111652  
ENSG00000111653  
ENSG00000111664  
ENSG00000111665  
ENSG00000111667  
ENSG00000111669  
ENSG00000111670  
ENSG00000111671  
ENSG00000111674  
ENSG00000111676  
ENSG00000111679  
ENSG00000111684  
ENSG00000111696  
ENSG00000111701  
ENSG00000111704  
ENSG00000111707  
ENSG00000111711  
ENSG00000111713  
ENSG00000111725  
ENSG00000111727  
ENSG00000111728  
ENSG00000111731  
ENSG00000111732  
ENSG00000111737  
ENSG00000111752  
ENSG00000111783  
ENSG00000111785  
ENSG00000111790  
ENSG00000111799  
ENSG00000111802  
ENSG00000111832  
ENSG00000111834  
ENSG00000111837  
ENSG00000111843

ENSG00000111846  
ENSG00000111850  
ENSG00000111859  
ENSG00000111860  
ENSG00000111863  
ENSG00000111875  
ENSG00000111877  
ENSG00000111880  
ENSG00000111885  
ENSG00000111886  
ENSG00000111906  
ENSG00000111907  
ENSG00000111911  
ENSG00000111912  
ENSG00000111913  
ENSG00000111961  
ENSG00000111962  
ENSG00000111981  
ENSG00000112031  
ENSG00000112033  
ENSG00000112038  
ENSG00000112039  
ENSG00000112041  
ENSG00000112053  
ENSG00000112062  
ENSG00000112078  
ENSG00000112079  
ENSG00000112081  
ENSG00000112096  
ENSG00000112115  
ENSG00000112118  
ENSG00000112130  
ENSG00000112137  
ENSG00000112139  
ENSG00000112144  
ENSG00000112146  
ENSG00000112149  
ENSG00000112159

ENSG00000112164  
ENSG00000112167  
ENSG00000112182  
ENSG00000112183  
ENSG00000112195  
ENSG00000112200  
ENSG00000112210  
ENSG00000112212  
ENSG00000112214  
ENSG00000112218  
ENSG00000112232  
ENSG00000112237  
ENSG00000112242  
ENSG00000112245  
ENSG00000112246  
ENSG00000112249  
ENSG00000112276  
ENSG00000112280  
ENSG00000112282  
ENSG00000112290  
ENSG00000112293  
ENSG00000112294  
ENSG00000112297  
ENSG00000112299  
ENSG00000112303  
ENSG00000112304  
ENSG00000112305  
ENSG00000112308  
ENSG00000112319  
ENSG00000112320  
ENSG00000112333  
ENSG00000112335  
ENSG00000112337  
ENSG00000112339  
ENSG00000112343  
ENSG00000112365  
ENSG00000112367  
ENSG00000112378

ENSG00000112379  
ENSG00000112394  
ENSG00000112406  
ENSG00000112414  
ENSG00000112419  
ENSG00000112425  
ENSG00000112462  
ENSG00000112473  
ENSG00000112486  
ENSG00000112494  
ENSG00000112499  
ENSG00000112514  
ENSG00000112531  
ENSG00000112541  
ENSG00000112559  
ENSG00000112561  
ENSG00000112562  
ENSG00000112576  
ENSG00000112584  
ENSG00000112592  
ENSG00000112599  
ENSG00000112619  
ENSG00000112624  
ENSG00000112640  
ENSG00000112651  
ENSG00000112655  
ENSG00000112658  
ENSG00000112667  
ENSG00000112679  
ENSG00000112685  
ENSG00000112695  
ENSG00000112697  
ENSG00000112699  
ENSG00000112715  
ENSG00000112739  
ENSG00000112742  
ENSG00000112759  
ENSG00000112763

ENSG00000112769  
ENSG00000112773  
ENSG00000112782  
ENSG00000112787  
ENSG00000112796  
ENSG00000112799  
ENSG00000112812  
ENSG00000112818  
ENSG00000112837  
ENSG00000112851  
ENSG00000112855  
ENSG00000112874  
ENSG00000112893  
ENSG00000112902  
ENSG00000112936  
ENSG00000112941  
ENSG00000112964  
ENSG00000112972  
ENSG00000112977  
ENSG00000112981  
ENSG00000112983  
ENSG00000112984  
ENSG00000113048  
ENSG00000113068  
ENSG00000113070  
ENSG00000113073  
ENSG00000113083  
ENSG00000113108  
ENSG00000113119  
ENSG00000113140  
ENSG00000113161  
ENSG00000113163  
ENSG00000113194  
ENSG00000113196  
ENSG00000113212  
ENSG00000113231  
ENSG00000113240  
ENSG00000113262

ENSG00000113263  
ENSG00000113269  
ENSG00000113272  
ENSG00000113273  
ENSG00000113300  
ENSG00000113302  
ENSG00000113303  
ENSG00000113312  
ENSG00000113318  
ENSG00000113319  
ENSG00000113327  
ENSG00000113356  
ENSG00000113360  
ENSG00000113361  
ENSG00000113368  
ENSG00000113369  
ENSG00000113384  
ENSG00000113387  
ENSG00000113389  
ENSG00000113391  
ENSG00000113396  
ENSG00000113430  
ENSG00000113441  
ENSG00000113448  
ENSG00000113456  
ENSG00000113492  
ENSG00000113494  
ENSG00000113504  
ENSG00000113522  
ENSG00000113525  
ENSG00000113532  
ENSG00000113552  
ENSG00000113555  
ENSG00000113558  
ENSG00000113578  
ENSG00000113580  
ENSG00000113583  
ENSG00000113594



ENSG00000113595  
ENSG00000113597  
ENSG00000113600  
ENSG00000113615  
ENSG00000113621  
ENSG00000113638  
ENSG00000113645  
ENSG00000113648  
ENSG00000113657  
ENSG00000113658  
ENSG00000113712  
ENSG00000113716  
ENSG00000113719  
ENSG00000113721  
ENSG00000113722  
ENSG00000113732  
ENSG00000113739  
ENSG00000113742  
ENSG00000113749  
ENSG00000113761  
ENSG00000113763  
ENSG00000113790  
ENSG00000113805  
ENSG00000113810  
ENSG00000113811  
ENSG00000113812  
ENSG00000113838  
ENSG00000113845  
ENSG00000113851  
ENSG00000113889  
ENSG00000113905  
ENSG00000113946  
ENSG00000113966  
ENSG00000114013  
ENSG00000114019  
ENSG00000114023  
ENSG00000114026  
ENSG00000114030

ENSG00000114062  
ENSG00000114098  
ENSG00000114107  
ENSG00000114113  
ENSG00000114115  
ENSG00000114120  
ENSG00000114125  
ENSG00000114126  
ENSG00000114127  
ENSG00000114166  
ENSG00000114209  
ENSG00000114248  
ENSG00000114251  
ENSG00000114268  
ENSG00000114270  
ENSG00000114279  
ENSG00000114302  
ENSG00000114315  
ENSG00000114316  
ENSG00000114331  
ENSG00000114349  
ENSG00000114353  
ENSG00000114354  
ENSG00000114374  
ENSG00000114378  
ENSG00000114383  
ENSG00000114395  
ENSG00000114405  
ENSG00000114416  
ENSG00000114423  
ENSG00000114439  
ENSG00000114446  
ENSG00000114450  
ENSG00000114455  
ENSG00000114473  
ENSG00000114480  
ENSG00000114491  
ENSG00000114503

ENSG00000114529  
ENSG00000114541  
ENSG00000114544  
ENSG00000114554  
ENSG00000114573  
ENSG00000114626  
ENSG00000114638  
ENSG00000114648  
ENSG00000114654  
ENSG00000114698  
ENSG00000114735  
ENSG00000114737  
ENSG00000114738  
ENSG00000114739  
ENSG00000114742  
ENSG00000114744  
ENSG00000114745  
ENSG00000114757  
ENSG00000114770  
ENSG00000114771  
ENSG00000114779  
ENSG00000114790  
ENSG00000114796  
ENSG00000114805  
ENSG00000114812  
ENSG00000114850  
ENSG00000114853  
ENSG00000114854  
ENSG00000114857  
ENSG00000114859  
ENSG00000114861  
ENSG00000114867  
ENSG00000114904  
ENSG00000114923  
ENSG00000114933  
ENSG00000114948  
ENSG00000114956  
ENSG00000114978

ENSG00000114982  
ENSG00000114988  
ENSG00000114999  
ENSG00000115008  
ENSG00000115009  
ENSG00000115020  
ENSG00000115041  
ENSG00000115073  
ENSG00000115084  
ENSG00000115091  
ENSG00000115107  
ENSG00000115109  
ENSG00000115112  
ENSG00000115129  
ENSG00000115137  
ENSG00000115145  
ENSG00000115159  
ENSG00000115163  
ENSG00000115165  
ENSG00000115170  
ENSG00000115194  
ENSG00000115204  
ENSG00000115207  
ENSG00000115216  
ENSG00000115221  
ENSG00000115226  
ENSG00000115232  
ENSG00000115233  
ENSG00000115234  
ENSG00000115239  
ENSG00000115241  
ENSG00000115252  
ENSG00000115263  
ENSG00000115266  
ENSG00000115271  
ENSG00000115275  
ENSG00000115282  
ENSG00000115286

ENSG00000115289  
ENSG00000115295  
ENSG00000115297  
ENSG00000115306  
ENSG00000115310  
ENSG00000115317  
ENSG00000115318  
ENSG00000115325  
ENSG00000115339  
ENSG00000115350  
ENSG00000115353  
ENSG00000115355  
ENSG00000115363  
ENSG00000115364  
ENSG00000115365  
ENSG00000115380  
ENSG00000115392  
ENSG00000115414  
ENSG00000115421  
ENSG00000115425  
ENSG00000115457  
ENSG00000115459  
ENSG00000115461  
ENSG00000115468  
ENSG00000115474  
ENSG00000115484  
ENSG00000115486  
ENSG00000115504  
ENSG00000115507  
ENSG00000115514  
ENSG00000115520  
ENSG00000115523  
ENSG00000115525  
ENSG00000115526  
ENSG00000115540  
ENSG00000115556  
ENSG00000115561  
ENSG00000115590

ENSG00000115592  
ENSG00000115593  
ENSG00000115594  
ENSG00000115596  
ENSG00000115598  
ENSG00000115602  
ENSG00000115604  
ENSG00000115607  
ENSG00000115616  
ENSG00000115641  
ENSG00000115648  
ENSG00000115652  
ENSG00000115661  
ENSG00000115665  
ENSG00000115677  
ENSG00000115687  
ENSG00000115694  
ENSG00000115705  
ENSG00000115718  
ENSG00000115738  
ENSG00000115756  
ENSG00000115758  
ENSG00000115760  
ENSG00000115761  
ENSG00000115762  
ENSG00000115806  
ENSG00000115808  
ENSG00000115825  
ENSG00000115827  
ENSG00000115839  
ENSG00000115844  
ENSG00000115875  
ENSG00000115884  
ENSG00000115896  
ENSG00000115902  
ENSG00000115904  
ENSG00000115935  
ENSG00000115942

ENSG00000115944  
ENSG00000115947  
ENSG00000115956  
ENSG00000115963  
ENSG00000115966  
ENSG00000115977  
ENSG00000115993  
ENSG00000115998  
ENSG00000116001  
ENSG00000116005  
ENSG00000116014  
ENSG00000116016  
ENSG00000116017  
ENSG00000116030  
ENSG00000116031  
ENSG00000116044  
ENSG00000116095  
ENSG00000116096  
ENSG00000116106  
ENSG00000116117  
ENSG00000116120  
ENSG00000116128  
ENSG00000116132  
ENSG00000116133  
ENSG00000116138  
ENSG00000116141  
ENSG00000116147  
ENSG00000116151  
ENSG00000116157  
ENSG00000116161  
ENSG00000116171  
ENSG00000116191  
ENSG00000116194  
ENSG00000116198  
ENSG00000116199  
ENSG00000116205  
ENSG00000116209  
ENSG00000116218

ENSG00000116237  
ENSG00000116251  
ENSG00000116254  
ENSG00000116260  
ENSG00000116266  
ENSG00000116273  
ENSG00000116285  
ENSG00000116299  
ENSG00000116329  
ENSG00000116337  
ENSG00000116350  
ENSG00000116353  
ENSG00000116396  
ENSG00000116406  
ENSG00000116455  
ENSG00000116473  
ENSG00000116478  
ENSG00000116489  
ENSG00000116497  
ENSG00000116521  
ENSG00000116525  
ENSG00000116539  
ENSG00000116574  
ENSG00000116580  
ENSG00000116584  
ENSG00000116586  
ENSG00000116604  
ENSG00000116641  
ENSG00000116649  
ENSG00000116661  
ENSG00000116663  
ENSG00000116667  
ENSG00000116668  
ENSG00000116675  
ENSG00000116678  
ENSG00000116679  
ENSG00000116685  
ENSG00000116688



ENSG00000116691  
ENSG00000116698  
ENSG00000116701  
ENSG00000116704  
ENSG00000116717  
ENSG00000116721  
ENSG00000116726  
ENSG00000116729  
ENSG00000116731  
ENSG00000116741  
ENSG00000116747  
ENSG00000116750  
ENSG00000116754  
ENSG00000116761  
ENSG00000116771  
ENSG00000116785  
ENSG00000116786  
ENSG00000116793  
ENSG00000116809  
ENSG00000116819  
ENSG00000116830  
ENSG00000116833  
ENSG00000116852  
ENSG00000116857  
ENSG00000116863  
ENSG00000116871  
ENSG00000116874  
ENSG00000116885  
ENSG00000116903  
ENSG00000116918  
ENSG00000116922  
ENSG00000116954  
ENSG00000116962  
ENSG00000116977  
ENSG00000116983  
ENSG00000116984  
ENSG00000116985  
ENSG00000116990

ENSG00000116991  
ENSG00000117009  
ENSG00000117010  
ENSG00000117013  
ENSG00000117016  
ENSG00000117020  
ENSG00000117036  
ENSG00000117054  
ENSG00000117069  
ENSG00000117090  
ENSG00000117091  
ENSG00000117114  
ENSG00000117115  
ENSG00000117122  
ENSG00000117139  
ENSG00000117143  
ENSG00000117148  
ENSG00000117151  
ENSG00000117152  
ENSG00000117153  
ENSG00000117155  
ENSG00000117174  
ENSG00000117215  
ENSG00000117222  
ENSG00000117226  
ENSG00000117228  
ENSG00000117245  
ENSG00000117262  
ENSG00000117266  
ENSG00000117280  
ENSG00000117281  
ENSG00000117298  
ENSG00000117305  
ENSG00000117318  
ENSG00000117322  
ENSG00000117335  
ENSG00000117362  
ENSG00000117385

ENSG00000117394  
ENSG00000117400  
ENSG00000117407  
ENSG00000117408  
ENSG00000117410  
ENSG00000117411  
ENSG00000117419  
ENSG00000117425  
ENSG00000117450  
ENSG00000117461  
ENSG00000117472  
ENSG00000117475  
ENSG00000117479  
ENSG00000117480  
ENSG00000117481  
ENSG00000117500  
ENSG00000117501  
ENSG00000117505  
ENSG00000117519  
ENSG00000117523  
ENSG00000117525  
ENSG00000117528  
ENSG00000117533  
ENSG00000117543  
ENSG00000117560  
ENSG00000117569  
ENSG00000117586  
ENSG00000117592  
ENSG00000117595  
ENSG00000117597  
ENSG00000117598  
ENSG00000117600  
ENSG00000117602  
ENSG00000117614  
ENSG00000117620  
ENSG00000117625  
ENSG00000117632  
ENSG00000117640

ENSG00000117643  
ENSG00000117676  
ENSG00000117682  
ENSG00000117697  
ENSG00000117707  
ENSG00000117713  
ENSG00000117724  
ENSG00000117748  
ENSG00000117751  
ENSG00000117758  
ENSG00000117859  
ENSG00000117862  
ENSG00000117868  
ENSG00000117899  
ENSG00000117971  
ENSG00000117983  
ENSG00000118004  
ENSG00000118007  
ENSG00000118017  
ENSG00000118058  
ENSG00000118096  
ENSG00000118113  
ENSG00000118160  
ENSG00000118162  
ENSG00000118193  
ENSG00000118197  
ENSG00000118200  
ENSG00000118217  
ENSG00000118242  
ENSG00000118245  
ENSG00000118246  
ENSG00000118257  
ENSG00000118260  
ENSG00000118263  
ENSG00000118276  
ENSG00000118298  
ENSG00000118307  
ENSG00000118322

ENSG00000118363  
ENSG00000118369  
ENSG00000118412  
ENSG00000118420  
ENSG00000118432  
ENSG00000118434  
ENSG00000118454  
ENSG00000118473  
ENSG00000118482  
ENSG00000118491  
ENSG00000118492  
ENSG00000118496  
ENSG00000118503  
ENSG00000118507  
ENSG00000118508  
ENSG00000118513  
ENSG00000118514  
ENSG00000118515  
ENSG00000118518  
ENSG00000118520  
ENSG00000118523  
ENSG00000118526  
ENSG00000118564  
ENSG00000118579  
ENSG00000118596  
ENSG00000118620  
ENSG00000118640  
ENSG00000118655  
ENSG00000118689  
ENSG00000118690  
ENSG00000118707  
ENSG00000118729  
ENSG00000118733  
ENSG00000118762  
ENSG00000118777  
ENSG00000118785  
ENSG00000118804  
ENSG00000118849

ENSG00000118873  
ENSG00000118894  
ENSG00000118898  
ENSG00000118900  
ENSG00000118922  
ENSG00000118946  
ENSG00000118960  
ENSG00000118961  
ENSG00000118965  
ENSG00000118971  
ENSG00000118972  
ENSG00000118985  
ENSG00000119004  
ENSG00000119042  
ENSG00000119048  
ENSG00000119121  
ENSG00000119125  
ENSG00000119138  
ENSG00000119203  
ENSG00000119227  
ENSG00000119231  
ENSG00000119242  
ENSG00000119280  
ENSG00000119283  
ENSG00000119285  
ENSG00000119314  
ENSG00000119318  
ENSG00000119321  
ENSG00000119328  
ENSG00000119335  
ENSG00000119383  
ENSG00000119396  
ENSG00000119401  
ENSG00000119402  
ENSG00000119403  
ENSG00000119408  
ENSG00000119411  
ENSG00000119414

ENSG00000119421  
ENSG00000119431  
ENSG00000119446  
ENSG00000119457  
ENSG00000119471  
ENSG00000119487  
ENSG00000119508  
ENSG00000119509  
ENSG00000119514  
ENSG00000119522  
ENSG00000119537  
ENSG00000119541  
ENSG00000119547  
ENSG00000119559  
ENSG00000119596  
ENSG00000119599  
ENSG00000119608  
ENSG00000119614  
ENSG00000119616  
ENSG00000119630  
ENSG00000119636  
ENSG00000119638  
ENSG00000119650  
ENSG00000119655  
ENSG00000119661  
ENSG00000119669  
ENSG00000119681  
ENSG00000119682  
ENSG00000119684  
ENSG00000119685  
ENSG00000119686  
ENSG00000119688  
ENSG00000119689  
ENSG00000119698  
ENSG00000119699  
ENSG00000119703  
ENSG00000119707  
ENSG00000119711

ENSG00000119714  
ENSG00000119715  
ENSG00000119720  
ENSG00000119725  
ENSG00000119729  
ENSG00000119760  
ENSG00000119771  
ENSG00000119772  
ENSG00000119777  
ENSG00000119778  
ENSG00000119782  
ENSG00000119787  
ENSG00000119801  
ENSG00000119812  
ENSG00000119820  
ENSG00000119862  
ENSG00000119865  
ENSG00000119866  
ENSG00000119878  
ENSG00000119899  
ENSG00000119900  
ENSG00000119906  
ENSG00000119912  
ENSG00000119913  
ENSG00000119915  
ENSG00000119917  
ENSG00000119919  
ENSG00000119922  
ENSG00000119927  
ENSG00000119938  
ENSG00000119943  
ENSG00000119946  
ENSG00000119950  
ENSG00000119953  
ENSG00000119965  
ENSG00000119973  
ENSG00000119977  
ENSG00000119979



ENSG00000119986  
ENSG00000120029  
ENSG00000120049  
ENSG00000120051  
ENSG00000120054  
ENSG00000120057  
ENSG00000120063  
ENSG00000120068  
ENSG00000120071  
ENSG00000120088  
ENSG00000120093  
ENSG00000120094  
ENSG00000120129  
ENSG00000120137  
ENSG00000120149  
ENSG00000120156  
ENSG00000120158  
ENSG00000120162  
ENSG00000120215  
ENSG00000120217  
ENSG00000120242  
ENSG00000120251  
ENSG00000120253  
ENSG00000120256  
ENSG00000120262  
ENSG00000120278  
ENSG00000120279  
ENSG00000120280  
ENSG00000120289  
ENSG00000120306  
ENSG00000120314  
ENSG00000120318  
ENSG00000120324  
ENSG00000120332  
ENSG00000120333  
ENSG00000120334  
ENSG00000120341  
ENSG00000120370

ENSG00000120438  
ENSG00000120440  
ENSG00000120451  
ENSG00000120457  
ENSG00000120471  
ENSG00000120509  
ENSG00000120519  
ENSG00000120526  
ENSG00000120533  
ENSG00000120539  
ENSG00000120549  
ENSG00000120594  
ENSG00000120616  
ENSG00000120645  
ENSG00000120647  
ENSG00000120656  
ENSG00000120658  
ENSG00000120659  
ENSG00000120662  
ENSG00000120669  
ENSG00000120675  
ENSG00000120686  
ENSG00000120690  
ENSG00000120693  
ENSG00000120694  
ENSG00000120705  
ENSG00000120708  
ENSG00000120709  
ENSG00000120725  
ENSG00000120727  
ENSG00000120733  
ENSG00000120738  
ENSG00000120742  
ENSG00000120756  
ENSG00000120784  
ENSG00000120798  
ENSG00000120800  
ENSG00000120802

ENSG00000120805  
ENSG00000120820  
ENSG00000120832  
ENSG00000120833  
ENSG00000120837  
ENSG00000120875  
ENSG00000120885  
ENSG00000120889  
ENSG00000120896  
ENSG00000120899  
ENSG00000120903  
ENSG00000120907  
ENSG00000120913  
ENSG00000120915  
ENSG00000120925  
ENSG00000120942  
ENSG00000120948  
ENSG00000120949  
ENSG00000120963  
ENSG00000121005  
ENSG00000121022  
ENSG00000121039  
ENSG00000121058  
ENSG00000121060  
ENSG00000121064  
ENSG00000121067  
ENSG00000121068  
ENSG00000121073  
ENSG00000121075  
ENSG00000121101  
ENSG00000121104  
ENSG00000121152  
ENSG00000121207  
ENSG00000121210  
ENSG00000121236  
ENSG00000121274  
ENSG00000121281  
ENSG00000121289

ENSG00000121297  
ENSG00000121310  
ENSG00000121350  
ENSG00000121351  
ENSG00000121361  
ENSG00000121380  
ENSG00000121381  
ENSG00000121390  
ENSG00000121406  
ENSG00000121410  
ENSG00000121413  
ENSG00000121417  
ENSG00000121446  
ENSG00000121454  
ENSG00000121481  
ENSG00000121486  
ENSG00000121542  
ENSG00000121552  
ENSG00000121570  
ENSG00000121577  
ENSG00000121578  
ENSG00000121579  
ENSG00000121594  
ENSG00000121644  
ENSG00000121653  
ENSG00000121671  
ENSG00000121680  
ENSG00000121716  
ENSG00000121741  
ENSG00000121742  
ENSG00000121743  
ENSG00000121749  
ENSG00000121753  
ENSG00000121766  
ENSG00000121769  
ENSG00000121774  
ENSG00000121807  
ENSG00000121851

ENSG00000121858  
ENSG00000121864  
ENSG00000121871  
ENSG00000121879  
ENSG00000121892  
ENSG00000121895  
ENSG00000121897  
ENSG00000121898  
ENSG00000121903  
ENSG00000121904  
ENSG00000121905  
ENSG00000121933  
ENSG00000121940  
ENSG00000121957  
ENSG00000121964  
ENSG00000121966  
ENSG00000121988  
ENSG00000121989  
ENSG00000122008  
ENSG00000122012  
ENSG00000122025  
ENSG00000122034  
ENSG00000122042  
ENSG00000122068  
ENSG00000122085  
ENSG00000122121  
ENSG00000122122  
ENSG00000122126  
ENSG00000122133  
ENSG00000122136  
ENSG00000122140  
ENSG00000122176  
ENSG00000122180  
ENSG00000122188  
ENSG00000122194  
ENSG00000122203  
ENSG00000122223  
ENSG00000122224

ENSG00000122254  
ENSG00000122299  
ENSG00000122304  
ENSG00000122335  
ENSG00000122359  
ENSG00000122367  
ENSG00000122375  
ENSG00000122376  
ENSG00000122378  
ENSG00000122386  
ENSG00000122390  
ENSG00000122417  
ENSG00000122420  
ENSG00000122477  
ENSG00000122481  
ENSG00000122482  
ENSG00000122484  
ENSG00000122490  
ENSG00000122507  
ENSG00000122512  
ENSG00000122515  
ENSG00000122543  
ENSG00000122545  
ENSG00000122547  
ENSG00000122550  
ENSG00000122557  
ENSG00000122565  
ENSG00000122566  
ENSG00000122574  
ENSG00000122584  
ENSG00000122585  
ENSG00000122591  
ENSG00000122592  
ENSG00000122641  
ENSG00000122642  
ENSG00000122643  
ENSG00000122644  
ENSG00000122678

ENSG00000122679  
ENSG00000122687  
ENSG00000122691  
ENSG00000122692  
ENSG00000122694  
ENSG00000122696  
ENSG00000122705  
ENSG00000122707  
ENSG00000122728  
ENSG00000122729  
ENSG00000122733  
ENSG00000122741  
ENSG00000122756  
ENSG00000122778  
ENSG00000122779  
ENSG00000122783  
ENSG00000122786  
ENSG00000122787  
ENSG00000122824  
ENSG00000122852  
ENSG00000122859  
ENSG00000122861  
ENSG00000122862  
ENSG00000122863  
ENSG00000122870  
ENSG00000122873  
ENSG00000122877  
ENSG00000122952  
ENSG00000122958  
ENSG00000122965  
ENSG00000122966  
ENSG00000122986  
ENSG00000123064  
ENSG00000123066  
ENSG00000123080  
ENSG00000123091  
ENSG00000123094  
ENSG00000123095

ENSG00000123096  
ENSG00000123104  
ENSG00000123106  
ENSG00000123119  
ENSG00000123124  
ENSG00000123130  
ENSG00000123144  
ENSG00000123146  
ENSG00000123154  
ENSG00000123159  
ENSG00000123165  
ENSG00000123178  
ENSG00000123179  
ENSG00000123191  
ENSG00000123200  
ENSG00000123213  
ENSG00000123219  
ENSG00000123240  
ENSG00000123243  
ENSG00000123268  
ENSG00000123297  
ENSG00000123307  
ENSG00000123329  
ENSG00000123338  
ENSG00000123342  
ENSG00000123349  
ENSG00000123352  
ENSG00000123353  
ENSG00000123360  
ENSG00000123364  
ENSG00000123374  
ENSG00000123388  
ENSG00000123405  
ENSG00000123411  
ENSG00000123415  
ENSG00000123427  
ENSG00000123444  
ENSG00000123453



ENSG00000123454  
ENSG00000123472  
ENSG00000123473  
ENSG00000123485  
ENSG00000123500  
ENSG00000123505  
ENSG00000123545  
ENSG00000123552  
ENSG00000123560  
ENSG00000123562  
ENSG00000123569  
ENSG00000123570  
ENSG00000123572  
ENSG00000123575  
ENSG00000123576  
ENSG00000123584  
ENSG00000123600  
ENSG00000123607  
ENSG00000123612  
ENSG00000123636  
ENSG00000123643  
ENSG00000123684  
ENSG00000123685  
ENSG00000123689  
ENSG00000123700  
ENSG00000123728  
ENSG00000123739  
ENSG00000123810  
ENSG00000123815  
ENSG00000123836  
ENSG00000123892  
ENSG00000123901  
ENSG00000123908  
ENSG00000123933  
ENSG00000123983  
ENSG00000123989  
ENSG00000123992  
ENSG00000124006

ENSG00000124019  
ENSG00000124067  
ENSG00000124092  
ENSG00000124098  
ENSG00000124104  
ENSG00000124116  
ENSG00000124120  
ENSG00000124126  
ENSG00000124134  
ENSG00000124140  
ENSG00000124143  
ENSG00000124145  
ENSG00000124151  
ENSG00000124155  
ENSG00000124160  
ENSG00000124164  
ENSG00000124171  
ENSG00000124177  
ENSG00000124181  
ENSG00000124191  
ENSG00000124193  
ENSG00000124194  
ENSG00000124198  
ENSG00000124201  
ENSG00000124203  
ENSG00000124205  
ENSG00000124208  
ENSG00000124209  
ENSG00000124212  
ENSG00000124214  
ENSG00000124215  
ENSG00000124216  
ENSG00000124217  
ENSG00000124222  
ENSG00000124225  
ENSG00000124226  
ENSG00000124227  
ENSG00000124237

ENSG00000124243  
ENSG00000124249  
ENSG00000124253  
ENSG00000124256  
ENSG00000124260  
ENSG00000124275  
ENSG00000124299  
ENSG00000124302  
ENSG00000124313  
ENSG00000124333  
ENSG00000124334  
ENSG00000124343  
ENSG00000124356  
ENSG00000124357  
ENSG00000124370  
ENSG00000124374  
ENSG00000124406  
ENSG00000124422  
ENSG00000124429  
ENSG00000124440  
ENSG00000124444  
ENSG00000124459  
ENSG00000124467  
ENSG00000124469  
ENSG00000124479  
ENSG00000124486  
ENSG00000124491  
ENSG00000124493  
ENSG00000124496  
ENSG00000124507  
ENSG00000124508  
ENSG00000124523  
ENSG00000124532  
ENSG00000124535  
ENSG00000124557  
ENSG00000124562  
ENSG00000124568  
ENSG00000124570

ENSG00000124571  
ENSG00000124574  
ENSG00000124593  
ENSG00000124596  
ENSG00000124602  
ENSG00000124608  
ENSG00000124613  
ENSG00000124615  
ENSG00000124641  
ENSG00000124659  
ENSG00000124664  
ENSG00000124688  
ENSG00000124701  
ENSG00000124702  
ENSG00000124713  
ENSG00000124731  
ENSG00000124743  
ENSG00000124749  
ENSG00000124762  
ENSG00000124766  
ENSG00000124767  
ENSG00000124772  
ENSG00000124782  
ENSG00000124783  
ENSG00000124784  
ENSG00000124785  
ENSG00000124786  
ENSG00000124788  
ENSG00000124795  
ENSG00000124812  
ENSG00000124813  
ENSG00000124818  
ENSG00000124827  
ENSG00000124831  
ENSG00000124839  
ENSG00000124875  
ENSG00000124882  
ENSG00000124920

ENSG00000124942  
ENSG00000125037  
ENSG00000125046  
ENSG00000125084  
ENSG00000125107  
ENSG00000125149  
ENSG00000125166  
ENSG00000125170  
ENSG00000125246  
ENSG00000125249  
ENSG00000125255  
ENSG00000125257  
ENSG00000125266  
ENSG00000125285  
ENSG00000125304  
ENSG00000125319  
ENSG00000125347  
ENSG00000125351  
ENSG00000125354  
ENSG00000125355  
ENSG00000125375  
ENSG00000125378  
ENSG00000125384  
ENSG00000125386  
ENSG00000125398  
ENSG00000125409  
ENSG00000125430  
ENSG00000125434  
ENSG00000125445  
ENSG00000125447  
ENSG00000125449  
ENSG00000125454  
ENSG00000125457  
ENSG00000125458  
ENSG00000125459  
ENSG00000125462  
ENSG00000125482  
ENSG00000125484

ENSG00000125485  
ENSG00000125498  
ENSG00000125503  
ENSG00000125505  
ENSG00000125508  
ENSG00000125510  
ENSG00000125520  
ENSG00000125538  
ENSG00000125551  
ENSG00000125611  
ENSG00000125618  
ENSG00000125629  
ENSG00000125630  
ENSG00000125633  
ENSG00000125637  
ENSG00000125648  
ENSG00000125651  
ENSG00000125657  
ENSG00000125675  
ENSG00000125686  
ENSG00000125726  
ENSG00000125733  
ENSG00000125735  
ENSG00000125740  
ENSG00000125741  
ENSG00000125744  
ENSG00000125746  
ENSG00000125753  
ENSG00000125772  
ENSG00000125775  
ENSG00000125779  
ENSG00000125780  
ENSG00000125788  
ENSG00000125798  
ENSG00000125810  
ENSG00000125812  
ENSG00000125813  
ENSG00000125814

ENSG00000125816  
ENSG00000125817  
ENSG00000125818  
ENSG00000125820  
ENSG00000125821  
ENSG00000125826  
ENSG00000125827  
ENSG00000125834  
ENSG00000125841  
ENSG00000125843  
ENSG00000125848  
ENSG00000125850  
ENSG00000125851  
ENSG00000125861  
ENSG00000125863  
ENSG00000125868  
ENSG00000125869  
ENSG00000125870  
ENSG00000125871  
ENSG00000125872  
ENSG00000125875  
ENSG00000125877  
ENSG00000125878  
ENSG00000125879  
ENSG00000125885  
ENSG00000125898  
ENSG00000125900  
ENSG00000125901  
ENSG00000125903  
ENSG00000125910  
ENSG00000125912  
ENSG00000125931  
ENSG00000125944  
ENSG00000125945  
ENSG00000125952  
ENSG00000125954  
ENSG00000125965  
ENSG00000125966

ENSG00000125967  
ENSG00000125968  
ENSG00000125970  
ENSG00000125971  
ENSG00000125975  
ENSG00000125977  
ENSG00000125991  
ENSG00000125998  
ENSG00000126001  
ENSG00000126003  
ENSG00000126012  
ENSG00000126016  
ENSG00000126062  
ENSG00000126067  
ENSG00000126070  
ENSG00000126091  
ENSG00000126106  
ENSG00000126214  
ENSG00000126215  
ENSG00000126216  
ENSG00000126217  
ENSG00000126218  
ENSG00000126226  
ENSG00000126231  
ENSG00000126233  
ENSG00000126243  
ENSG00000126247  
ENSG00000126259  
ENSG00000126261  
ENSG00000126262  
ENSG00000126337  
ENSG00000126351  
ENSG00000126353  
ENSG00000126391  
ENSG00000126453  
ENSG00000126458  
ENSG00000126460  
ENSG00000126464



ENSG00000126500  
ENSG00000126524  
ENSG00000126545  
ENSG00000126561  
ENSG00000126562  
ENSG00000126581  
ENSG00000126603  
ENSG00000126698  
ENSG00000126705  
ENSG00000126733  
ENSG00000126746  
ENSG00000126767  
ENSG00000126768  
ENSG00000126773  
ENSG00000126775  
ENSG00000126777  
ENSG00000126778  
ENSG00000126785  
ENSG00000126787  
ENSG00000126803  
ENSG00000126804  
ENSG00000126814  
ENSG00000126821  
ENSG00000126822  
ENSG00000126856  
ENSG00000126858  
ENSG00000126860  
ENSG00000126878  
ENSG00000126882  
ENSG00000126883  
ENSG00000126890  
ENSG00000126895  
ENSG00000126903  
ENSG00000126934  
ENSG00000126945  
ENSG00000126950  
ENSG00000126953  
ENSG00000126970

ENSG00000127022  
ENSG00000127074  
ENSG00000127080  
ENSG00000127081  
ENSG00000127083  
ENSG00000127084  
ENSG00000127124  
ENSG00000127125  
ENSG00000127129  
ENSG00000127152  
ENSG00000127184  
ENSG00000127191  
ENSG00000127241  
ENSG00000127249  
ENSG00000127311  
ENSG00000127314  
ENSG00000127318  
ENSG00000127325  
ENSG00000127328  
ENSG00000127329  
ENSG00000127334  
ENSG00000127362  
ENSG00000127366  
ENSG00000127377  
ENSG00000127418  
ENSG00000127423  
ENSG00000127445  
ENSG00000127452  
ENSG00000127463  
ENSG00000127472  
ENSG00000127483  
ENSG00000127507  
ENSG00000127511  
ENSG00000127526  
ENSG00000127527  
ENSG00000127528  
ENSG00000127533  
ENSG00000127554

ENSG00000127561  
ENSG00000127580  
ENSG00000127585  
ENSG00000127603  
ENSG00000127663  
ENSG00000127804  
ENSG00000127837  
ENSG00000127838  
ENSG00000127863  
ENSG00000127884  
ENSG00000127903  
ENSG00000127914  
ENSG00000127922  
ENSG00000127946  
ENSG00000127947  
ENSG00000127951  
ENSG00000127952  
ENSG00000127954  
ENSG00000127955  
ENSG00000127989  
ENSG00000127993  
ENSG00000128000  
ENSG00000128011  
ENSG00000128016  
ENSG00000128039  
ENSG00000128045  
ENSG00000128050  
ENSG00000128052  
ENSG00000128059  
ENSG00000128165  
ENSG00000128185  
ENSG00000128191  
ENSG00000128203  
ENSG00000128242  
ENSG00000128245  
ENSG00000128266  
ENSG00000128268  
ENSG00000128271

ENSG00000128274  
ENSG00000128283  
ENSG00000128284  
ENSG00000128285  
ENSG00000128309  
ENSG00000128313  
ENSG00000128335  
ENSG00000128340  
ENSG00000128342  
ENSG00000128346  
ENSG00000128383  
ENSG00000128394  
ENSG00000128463  
ENSG00000128482  
ENSG00000128487  
ENSG00000128510  
ENSG00000128512  
ENSG00000128513  
ENSG00000128524  
ENSG00000128534  
ENSG00000128536  
ENSG00000128563  
ENSG00000128564  
ENSG00000128567  
ENSG00000128573  
ENSG00000128578  
ENSG00000128581  
ENSG00000128585  
ENSG00000128590  
ENSG00000128591  
ENSG00000128594  
ENSG00000128595  
ENSG00000128596  
ENSG00000128602  
ENSG00000128604  
ENSG00000128607  
ENSG00000128609  
ENSG00000128610

ENSG00000128626  
ENSG00000128654  
ENSG00000128655  
ENSG00000128656  
ENSG00000128683  
ENSG00000128694  
ENSG00000128699  
ENSG00000128708  
ENSG00000128709  
ENSG00000128710  
ENSG00000128713  
ENSG00000128714  
ENSG00000128731  
ENSG00000128789  
ENSG00000128791  
ENSG00000128805  
ENSG00000128815  
ENSG00000128829  
ENSG00000128833  
ENSG00000128849  
ENSG00000128872  
ENSG00000128881  
ENSG00000128891  
ENSG00000128908  
ENSG00000128915  
ENSG00000128917  
ENSG00000128918  
ENSG00000128923  
ENSG00000128928  
ENSG00000128944  
ENSG00000128951  
ENSG00000128965  
ENSG00000128973  
ENSG00000128989  
ENSG00000129003  
ENSG00000129007  
ENSG00000129009  
ENSG00000129028

ENSG00000129055  
ENSG00000129071  
ENSG00000129103  
ENSG00000129116  
ENSG00000129128  
ENSG00000129152  
ENSG00000129159  
ENSG00000129167  
ENSG00000129170  
ENSG00000129187  
ENSG00000129195  
ENSG00000129197  
ENSG00000129204  
ENSG00000129219  
ENSG00000129221  
ENSG00000129226  
ENSG00000129235  
ENSG00000129244  
ENSG00000129245  
ENSG00000129250  
ENSG00000129255  
ENSG00000129292  
ENSG00000129295  
ENSG00000129315  
ENSG00000129347  
ENSG00000129351  
ENSG00000129353  
ENSG00000129354  
ENSG00000129355  
ENSG00000129422  
ENSG00000129451  
ENSG00000129460  
ENSG00000129465  
ENSG00000129472  
ENSG00000129473  
ENSG00000129474  
ENSG00000129493  
ENSG00000129514

ENSG00000129515  
ENSG00000129521  
ENSG00000129534  
ENSG00000129535  
ENSG00000129538  
ENSG00000129559  
ENSG00000129595  
ENSG00000129596  
ENSG00000129625  
ENSG00000129654  
ENSG00000129657  
ENSG00000129667  
ENSG00000129675  
ENSG00000129680  
ENSG00000129682  
ENSG00000129691  
ENSG00000129696  
ENSG00000129749  
ENSG00000129757  
ENSG00000129810  
ENSG00000129910  
ENSG00000129911  
ENSG00000129925  
ENSG00000129932  
ENSG00000129933  
ENSG00000129946  
ENSG00000129988  
ENSG00000129990  
ENSG00000129991  
ENSG00000129993  
ENSG00000130005  
ENSG00000130021  
ENSG00000130032  
ENSG00000130035  
ENSG00000130037  
ENSG00000130038  
ENSG00000130045  
ENSG00000130052

ENSG00000130054  
ENSG00000130055  
ENSG00000130119  
ENSG00000130147  
ENSG00000130150  
ENSG00000130159  
ENSG00000130164  
ENSG00000130165  
ENSG00000130167  
ENSG00000130173  
ENSG00000130175  
ENSG00000130176  
ENSG00000130193  
ENSG00000130201  
ENSG00000130202  
ENSG00000130204  
ENSG00000130224  
ENSG00000130226  
ENSG00000130227  
ENSG00000130234  
ENSG00000130270  
ENSG00000130287  
ENSG00000130294  
ENSG00000130303  
ENSG00000130304  
ENSG00000130305  
ENSG00000130309  
ENSG00000130311  
ENSG00000130312  
ENSG00000130313  
ENSG00000130332  
ENSG00000130338  
ENSG00000130340  
ENSG00000130347  
ENSG00000130348  
ENSG00000130349  
ENSG00000130368  
ENSG00000130377



ENSG00000130382  
ENSG00000130383  
ENSG00000130396  
ENSG00000130402  
ENSG00000130413  
ENSG00000130414  
ENSG00000130427  
ENSG00000130429  
ENSG00000130449  
ENSG00000130475  
ENSG00000130477  
ENSG00000130487  
ENSG00000130508  
ENSG00000130513  
ENSG00000130517  
ENSG00000130518  
ENSG00000130520  
ENSG00000130522  
ENSG00000130529  
ENSG00000130540  
ENSG00000130544  
ENSG00000130545  
ENSG00000130558  
ENSG00000130559  
ENSG00000130560  
ENSG00000130584  
ENSG00000130589  
ENSG00000130590  
ENSG00000130592  
ENSG00000130595  
ENSG00000130598  
ENSG00000130635  
ENSG00000130638  
ENSG00000130640  
ENSG00000130653  
ENSG00000130675  
ENSG00000130684  
ENSG00000130695

ENSG00000130700  
ENSG00000130701  
ENSG00000130703  
ENSG00000130706  
ENSG00000130707  
ENSG00000130711  
ENSG00000130713  
ENSG00000130714  
ENSG00000130717  
ENSG00000130720  
ENSG00000130723  
ENSG00000130725  
ENSG00000130731  
ENSG00000130741  
ENSG00000130749  
ENSG00000130751  
ENSG00000130758  
ENSG00000130766  
ENSG00000130768  
ENSG00000130770  
ENSG00000130772  
ENSG00000130775  
ENSG00000130779  
ENSG00000130783  
ENSG00000130787  
ENSG00000130803  
ENSG00000130810  
ENSG00000130813  
ENSG00000130818  
ENSG00000130821  
ENSG00000130822  
ENSG00000130826  
ENSG00000130827  
ENSG00000130829  
ENSG00000130830  
ENSG00000130844  
ENSG00000130856  
ENSG00000130881

ENSG00000130921  
ENSG00000130940  
ENSG00000130943  
ENSG00000130948  
ENSG00000130950  
ENSG00000130956  
ENSG00000130957  
ENSG00000130958  
ENSG00000130962  
ENSG00000130988  
ENSG00000130997  
ENSG00000131018  
ENSG00000131019  
ENSG00000131023  
ENSG00000131037  
ENSG00000131043  
ENSG00000131044  
ENSG00000131051  
ENSG00000131059  
ENSG00000131061  
ENSG00000131067  
ENSG00000131068  
ENSG00000131069  
ENSG00000131080  
ENSG00000131089  
ENSG00000131094  
ENSG00000131095  
ENSG00000131100  
ENSG00000131116  
ENSG00000131142  
ENSG00000131143  
ENSG00000131148  
ENSG00000131149  
ENSG00000131153  
ENSG00000131165  
ENSG00000131171  
ENSG00000131183  
ENSG00000131187

ENSG00000131188  
ENSG00000131196  
ENSG00000131233  
ENSG00000131236  
ENSG00000131238  
ENSG00000131242  
ENSG00000131263  
ENSG00000131323  
ENSG00000131368  
ENSG00000131370  
ENSG00000131374  
ENSG00000131375  
ENSG00000131378  
ENSG00000131381  
ENSG00000131386  
ENSG00000131389  
ENSG00000131398  
ENSG00000131409  
ENSG00000131435  
ENSG00000131437  
ENSG00000131446  
ENSG00000131459  
ENSG00000131467  
ENSG00000131470  
ENSG00000131471  
ENSG00000131475  
ENSG00000131482  
ENSG00000131495  
ENSG00000131503  
ENSG00000131504  
ENSG00000131507  
ENSG00000131508  
ENSG00000131558  
ENSG00000131584  
ENSG00000131591  
ENSG00000131620  
ENSG00000131626  
ENSG00000131634

ENSG00000131650  
ENSG00000131652  
ENSG00000131653  
ENSG00000131669  
ENSG00000131697  
ENSG00000131711  
ENSG00000131724  
ENSG00000131737  
ENSG00000131738  
ENSG00000131746  
ENSG00000131747  
ENSG00000131748  
ENSG00000131759  
ENSG00000131771  
ENSG00000131773  
ENSG00000131779  
ENSG00000131781  
ENSG00000131788  
ENSG00000131791  
ENSG00000131808  
ENSG00000131828  
ENSG00000131831  
ENSG00000131844  
ENSG00000131845  
ENSG00000131848  
ENSG00000131849  
ENSG00000131871  
ENSG00000131873  
ENSG00000131899  
ENSG00000131910  
ENSG00000131914  
ENSG00000131931  
ENSG00000131941  
ENSG00000131943  
ENSG00000131944  
ENSG00000131966  
ENSG00000131979  
ENSG00000132000

ENSG00000132002  
ENSG00000132003  
ENSG00000132004  
ENSG00000132005  
ENSG00000132010  
ENSG00000132016  
ENSG00000132017  
ENSG00000132026  
ENSG00000132109  
ENSG00000132122  
ENSG00000132128  
ENSG00000132155  
ENSG00000132164  
ENSG00000132170  
ENSG00000132182  
ENSG00000132185  
ENSG00000132196  
ENSG00000132199  
ENSG00000132205  
ENSG00000132254  
ENSG00000132274  
ENSG00000132275  
ENSG00000132286  
ENSG00000132294  
ENSG00000132297  
ENSG00000132300  
ENSG00000132305  
ENSG00000132313  
ENSG00000132321  
ENSG00000132326  
ENSG00000132329  
ENSG00000132330  
ENSG00000132334  
ENSG00000132341  
ENSG00000132356  
ENSG00000132357  
ENSG00000132359  
ENSG00000132361

ENSG00000132376  
ENSG00000132382  
ENSG00000132383  
ENSG00000132388  
ENSG00000132394  
ENSG00000132405  
ENSG00000132406  
ENSG00000132424  
ENSG00000132434  
ENSG00000132436  
ENSG00000132437  
ENSG00000132463  
ENSG00000132464  
ENSG00000132465  
ENSG00000132466  
ENSG00000132467  
ENSG00000132471  
ENSG00000132475  
ENSG00000132478  
ENSG00000132481  
ENSG00000132485  
ENSG00000132507  
ENSG00000132510  
ENSG00000132517  
ENSG00000132518  
ENSG00000132530  
ENSG00000132535  
ENSG00000132541  
ENSG00000132549  
ENSG00000132563  
ENSG00000132570  
ENSG00000132581  
ENSG00000132589  
ENSG00000132591  
ENSG00000132603  
ENSG00000132604  
ENSG00000132612  
ENSG00000132613

ENSG00000132622  
ENSG00000132623  
ENSG00000132631  
ENSG00000132639  
ENSG00000132640  
ENSG00000132664  
ENSG00000132669  
ENSG00000132670  
ENSG00000132676  
ENSG00000132677  
ENSG00000132680  
ENSG00000132681  
ENSG00000132692  
ENSG00000132693  
ENSG00000132694  
ENSG00000132704  
ENSG00000132716  
ENSG00000132718  
ENSG00000132740  
ENSG00000132746  
ENSG00000132749  
ENSG00000132763  
ENSG00000132768  
ENSG00000132780  
ENSG00000132793  
ENSG00000132801  
ENSG00000132819  
ENSG00000132821  
ENSG00000132823  
ENSG00000132824  
ENSG00000132825  
ENSG00000132840  
ENSG00000132842  
ENSG00000132846  
ENSG00000132849  
ENSG00000132854  
ENSG00000132872  
ENSG00000132874



ENSG00000132879  
ENSG00000132906  
ENSG00000132911  
ENSG00000132912  
ENSG00000132915  
ENSG00000132932  
ENSG00000132938  
ENSG00000132950  
ENSG00000132952  
ENSG00000132953  
ENSG00000132964  
ENSG00000132970  
ENSG00000132975  
ENSG00000133020  
ENSG00000133026  
ENSG00000133027  
ENSG00000133030  
ENSG00000133055  
ENSG00000133056  
ENSG00000133059  
ENSG00000133063  
ENSG00000133065  
ENSG00000133067  
ENSG00000133069  
ENSG00000133083  
ENSG00000133103  
ENSG00000133104  
ENSG00000133105  
ENSG00000133106  
ENSG00000133107  
ENSG00000133110  
ENSG00000133111  
ENSG00000133112  
ENSG00000133114  
ENSG00000133116  
ENSG00000133119  
ENSG00000133121  
ENSG00000133131

ENSG00000133134  
ENSG00000133135  
ENSG00000133138  
ENSG00000133193  
ENSG00000133195  
ENSG00000133216  
ENSG00000133226  
ENSG00000133247  
ENSG00000133250  
ENSG00000133265  
ENSG00000133313  
ENSG00000133317  
ENSG00000133318  
ENSG00000133392  
ENSG00000133393  
ENSG00000133398  
ENSG00000133401  
ENSG00000133422  
ENSG00000133424  
ENSG00000133433  
ENSG00000133454  
ENSG00000133460  
ENSG00000133466  
ENSG00000133475  
ENSG00000133477  
ENSG00000133488  
ENSG00000133561  
ENSG00000133574  
ENSG00000133606  
ENSG00000133612  
ENSG00000133619  
ENSG00000133627  
ENSG00000133639  
ENSG00000133641  
ENSG00000133657  
ENSG00000133678  
ENSG00000133687  
ENSG00000133703

ENSG00000133704  
ENSG00000133706  
ENSG00000133740  
ENSG00000133773  
ENSG00000133789  
ENSG00000133794  
ENSG00000133800  
ENSG00000133805  
ENSG00000133808  
ENSG00000133812  
ENSG00000133816  
ENSG00000133835  
ENSG00000133872  
ENSG00000133874  
ENSG00000133878  
ENSG00000133884  
ENSG00000133935  
ENSG00000133943  
ENSG00000133961  
ENSG00000133980  
ENSG00000133983  
ENSG00000133985  
ENSG00000133997  
ENSG00000134001  
ENSG00000134013  
ENSG00000134014  
ENSG00000134020  
ENSG00000134028  
ENSG00000134030  
ENSG00000134042  
ENSG00000134046  
ENSG00000134049  
ENSG00000134057  
ENSG00000134061  
ENSG00000134070  
ENSG00000134072  
ENSG00000134077  
ENSG00000134086

ENSG00000134107  
ENSG00000134108  
ENSG00000134109  
ENSG00000134115  
ENSG00000134121  
ENSG00000134138  
ENSG00000134146  
ENSG00000134160  
ENSG00000134186  
ENSG00000134193  
ENSG00000134198  
ENSG00000134200  
ENSG00000134201  
ENSG00000134202  
ENSG00000134207  
ENSG00000134215  
ENSG00000134240  
ENSG00000134243  
ENSG00000134245  
ENSG00000134247  
ENSG00000134249  
ENSG00000134250  
ENSG00000134253  
ENSG00000134255  
ENSG00000134256  
ENSG00000134258  
ENSG00000134265  
ENSG00000134278  
ENSG00000134283  
ENSG00000134285  
ENSG00000134287  
ENSG00000134291  
ENSG00000134294  
ENSG00000134308  
ENSG00000134317  
ENSG00000134318  
ENSG00000134321  
ENSG00000134323

ENSG00000134324  
ENSG00000134326  
ENSG00000134333  
ENSG00000134339  
ENSG00000134343  
ENSG00000134352  
ENSG00000134369  
ENSG00000134371  
ENSG00000134375  
ENSG00000134389  
ENSG00000134398  
ENSG00000134419  
ENSG00000134438  
ENSG00000134444  
ENSG00000134452  
ENSG00000134453  
ENSG00000134460  
ENSG00000134461  
ENSG00000134470  
ENSG00000134489  
ENSG00000134490  
ENSG00000134504  
ENSG00000134508  
ENSG00000134516  
ENSG00000134531  
ENSG00000134532  
ENSG00000134533  
ENSG00000134538  
ENSG00000134539  
ENSG00000134548  
ENSG00000134551  
ENSG00000134569  
ENSG00000134574  
ENSG00000134575  
ENSG00000134590  
ENSG00000134602  
ENSG00000134627  
ENSG00000134640

ENSG00000134644  
ENSG00000134668  
ENSG00000134684  
ENSG00000134686  
ENSG00000134690  
ENSG00000134698  
ENSG00000134709  
ENSG00000134716  
ENSG00000134717  
ENSG00000134744  
ENSG00000134748  
ENSG00000134755  
ENSG00000134757  
ENSG00000134758  
ENSG00000134760  
ENSG00000134762  
ENSG00000134765  
ENSG00000134769  
ENSG00000134775  
ENSG00000134779  
ENSG00000134780  
ENSG00000134802  
ENSG00000134809  
ENSG00000134815  
ENSG00000134817  
ENSG00000134824  
ENSG00000134851  
ENSG00000134852  
ENSG00000134853  
ENSG00000134864  
ENSG00000134873  
ENSG00000134874  
ENSG00000134882  
ENSG00000134897  
ENSG00000134899  
ENSG00000134909  
ENSG00000134910  
ENSG00000134917

ENSG00000134954  
ENSG00000134962  
ENSG00000134970  
ENSG00000134982  
ENSG00000134986  
ENSG00000134987  
ENSG00000134996  
ENSG00000135002  
ENSG00000135018  
ENSG00000135040  
ENSG00000135045  
ENSG00000135047  
ENSG00000135048  
ENSG00000135049  
ENSG00000135052  
ENSG00000135063  
ENSG00000135069  
ENSG00000135070  
ENSG00000135074  
ENSG00000135077  
ENSG00000135083  
ENSG00000135090  
ENSG00000135093  
ENSG00000135094  
ENSG00000135097  
ENSG00000135100  
ENSG00000135108  
ENSG00000135111  
ENSG00000135114  
ENSG00000135116  
ENSG00000135119  
ENSG00000135124  
ENSG00000135127  
ENSG00000135144  
ENSG00000135148  
ENSG00000135164  
ENSG00000135185  
ENSG00000135218

ENSG00000135220  
ENSG00000135226  
ENSG00000135241  
ENSG00000135245  
ENSG00000135248  
ENSG00000135250  
ENSG00000135272  
ENSG00000135297  
ENSG00000135299  
ENSG00000135312  
ENSG00000135315  
ENSG00000135316  
ENSG00000135318  
ENSG00000135324  
ENSG00000135334  
ENSG00000135338  
ENSG00000135341  
ENSG00000135362  
ENSG00000135363  
ENSG00000135365  
ENSG00000135372  
ENSG00000135373  
ENSG00000135374  
ENSG00000135378  
ENSG00000135387  
ENSG00000135392  
ENSG00000135404  
ENSG00000135406  
ENSG00000135409  
ENSG00000135414  
ENSG00000135423  
ENSG00000135424  
ENSG00000135426  
ENSG00000135436  
ENSG00000135439  
ENSG00000135443  
ENSG00000135446  
ENSG00000135447



ENSG00000135452  
ENSG00000135454  
ENSG00000135457  
ENSG00000135469  
ENSG00000135472  
ENSG00000135473  
ENSG00000135482  
ENSG00000135502  
ENSG00000135503  
ENSG00000135506  
ENSG00000135517  
ENSG00000135519  
ENSG00000135521  
ENSG00000135525  
ENSG00000135535  
ENSG00000135537  
ENSG00000135540  
ENSG00000135541  
ENSG00000135547  
ENSG00000135597  
ENSG00000135604  
ENSG00000135605  
ENSG00000135622  
ENSG00000135624  
ENSG00000135625  
ENSG00000135631  
ENSG00000135632  
ENSG00000135637  
ENSG00000135638  
ENSG00000135643  
ENSG00000135655  
ENSG00000135677  
ENSG00000135678  
ENSG00000135679  
ENSG00000135686  
ENSG00000135697  
ENSG00000135702  
ENSG00000135709

ENSG00000135720  
ENSG00000135722  
ENSG00000135736  
ENSG00000135740  
ENSG00000135744  
ENSG00000135766  
ENSG00000135775  
ENSG00000135776  
ENSG00000135778  
ENSG00000135801  
ENSG00000135821  
ENSG00000135823  
ENSG00000135824  
ENSG00000135828  
ENSG00000135837  
ENSG00000135838  
ENSG00000135842  
ENSG00000135845  
ENSG00000135862  
ENSG00000135870  
ENSG00000135898  
ENSG00000135902  
ENSG00000135903  
ENSG00000135905  
ENSG00000135912  
ENSG00000135913  
ENSG00000135916  
ENSG00000135917  
ENSG00000135919  
ENSG00000135924  
ENSG00000135925  
ENSG00000135926  
ENSG00000135930  
ENSG00000135931  
ENSG00000135932  
ENSG00000135940  
ENSG00000135951  
ENSG00000135953

ENSG00000135956  
ENSG00000135960  
ENSG00000135966  
ENSG00000135968  
ENSG00000135973  
ENSG00000135974  
ENSG00000135999  
ENSG00000136002  
ENSG00000136003  
ENSG00000136010  
ENSG00000136014  
ENSG00000136021  
ENSG00000136026  
ENSG00000136040  
ENSG00000136044  
ENSG00000136045  
ENSG00000136048  
ENSG00000136051  
ENSG00000136068  
ENSG00000136098  
ENSG00000136099  
ENSG00000136100  
ENSG00000136104  
ENSG00000136108  
ENSG00000136111  
ENSG00000136114  
ENSG00000136122  
ENSG00000136141  
ENSG00000136143  
ENSG00000136144  
ENSG00000136146  
ENSG00000136152  
ENSG00000136153  
ENSG00000136155  
ENSG00000136158  
ENSG00000136159  
ENSG00000136160  
ENSG00000136161

ENSG00000136167  
ENSG00000136169  
ENSG00000136193  
ENSG00000136197  
ENSG00000136205  
ENSG00000136206  
ENSG00000136213  
ENSG00000136235  
ENSG00000136237  
ENSG00000136238  
ENSG00000136240  
ENSG00000136244  
ENSG00000136250  
ENSG00000136261  
ENSG00000136267  
ENSG00000136270  
ENSG00000136271  
ENSG00000136273  
ENSG00000136279  
ENSG00000136280  
ENSG00000136295  
ENSG00000136297  
ENSG00000136319  
ENSG00000136327  
ENSG00000136352  
ENSG00000136367  
ENSG00000136371  
ENSG00000136379  
ENSG00000136381  
ENSG00000136383  
ENSG00000136404  
ENSG00000136425  
ENSG00000136436  
ENSG00000136444  
ENSG00000136448  
ENSG00000136450  
ENSG00000136451  
ENSG00000136457

ENSG00000136478  
ENSG00000136485  
ENSG00000136487  
ENSG00000136490  
ENSG00000136492  
ENSG00000136504  
ENSG00000136518  
ENSG00000136521  
ENSG00000136527  
ENSG00000136531  
ENSG00000136535  
ENSG00000136536  
ENSG00000136541  
ENSG00000136546  
ENSG00000136574  
ENSG00000136603  
ENSG00000136634  
ENSG00000136643  
ENSG00000136688  
ENSG00000136689  
ENSG00000136695  
ENSG00000136696  
ENSG00000136697  
ENSG00000136698  
ENSG00000136699  
ENSG00000136709  
ENSG00000136710  
ENSG00000136715  
ENSG00000136718  
ENSG00000136720  
ENSG00000136731  
ENSG00000136732  
ENSG00000136738  
ENSG00000136750  
ENSG00000136754  
ENSG00000136758  
ENSG00000136783  
ENSG00000136802

ENSG00000136811  
ENSG00000136813  
ENSG00000136816  
ENSG00000136819  
ENSG00000136824  
ENSG00000136827  
ENSG00000136828  
ENSG00000136830  
ENSG00000136840  
ENSG00000136842  
ENSG00000136848  
ENSG00000136854  
ENSG00000136856  
ENSG00000136859  
ENSG00000136861  
ENSG00000136867  
ENSG00000136868  
ENSG00000136869  
ENSG00000136870  
ENSG00000136872  
ENSG00000136874  
ENSG00000136875  
ENSG00000136877  
ENSG00000136878  
ENSG00000136881  
ENSG00000136883  
ENSG00000136888  
ENSG00000136897  
ENSG00000136908  
ENSG00000136925  
ENSG00000136928  
ENSG00000136931  
ENSG00000136932  
ENSG00000136935  
ENSG00000136936  
ENSG00000136940  
ENSG00000136943  
ENSG00000136944

ENSG00000136950  
ENSG00000136960  
ENSG00000136986  
ENSG00000136999  
ENSG00000137033  
ENSG00000137038  
ENSG00000137040  
ENSG00000137054  
ENSG00000137055  
ENSG00000137070  
ENSG00000137073  
ENSG00000137074  
ENSG00000137075  
ENSG00000137077  
ENSG00000137094  
ENSG00000137100  
ENSG00000137101  
ENSG00000137103  
ENSG00000137106  
ENSG00000137124  
ENSG00000137135  
ENSG00000137142  
ENSG00000137145  
ENSG00000137161  
ENSG00000137166  
ENSG00000137168  
ENSG00000137171  
ENSG00000137177  
ENSG00000137193  
ENSG00000137198  
ENSG00000137200  
ENSG00000137203  
ENSG00000137204  
ENSG00000137210  
ENSG00000137216  
ENSG00000137221  
ENSG00000137225  
ENSG00000137261

ENSG00000137265  
ENSG00000137266  
ENSG00000137269  
ENSG00000137270  
ENSG00000137273  
ENSG00000137274  
ENSG00000137275  
ENSG00000137288  
ENSG00000137309  
ENSG00000137310  
ENSG00000137331  
ENSG00000137337  
ENSG00000137343  
ENSG00000137364  
ENSG00000137393  
ENSG00000137404  
ENSG00000137409  
ENSG00000137413  
ENSG00000137414  
ENSG00000137440  
ENSG00000137441  
ENSG00000137449  
ENSG00000137460  
ENSG00000137462  
ENSG00000137473  
ENSG00000137474  
ENSG00000137478  
ENSG00000137486  
ENSG00000137491  
ENSG00000137492  
ENSG00000137494  
ENSG00000137496  
ENSG00000137500  
ENSG00000137501  
ENSG00000137502  
ENSG00000137504  
ENSG00000137507  
ENSG00000137509



ENSG00000137513  
ENSG00000137522  
ENSG00000137547  
ENSG00000137558  
ENSG00000137561  
ENSG00000137571  
ENSG00000137573  
ENSG00000137574  
ENSG00000137575  
ENSG00000137628  
ENSG00000137642  
ENSG00000137648  
ENSG00000137656  
ENSG00000137691  
ENSG00000137692  
ENSG00000137693  
ENSG00000137699  
ENSG00000137707  
ENSG00000137709  
ENSG00000137710  
ENSG00000137713  
ENSG00000137714  
ENSG00000137720  
ENSG00000137726  
ENSG00000137727  
ENSG00000137731  
ENSG00000137745  
ENSG00000137747  
ENSG00000137752  
ENSG00000137760  
ENSG00000137764  
ENSG00000137770  
ENSG00000137776  
ENSG00000137801  
ENSG00000137802  
ENSG00000137807  
ENSG00000137809  
ENSG00000137814

ENSG00000137815  
ENSG00000137817  
ENSG00000137819  
ENSG00000137822  
ENSG00000137824  
ENSG00000137825  
ENSG00000137831  
ENSG00000137841  
ENSG00000137842  
ENSG00000137843  
ENSG00000137845  
ENSG00000137868  
ENSG00000137869  
ENSG00000137871  
ENSG00000137872  
ENSG00000137875  
ENSG00000137876  
ENSG00000137877  
ENSG00000137936  
ENSG00000137941  
ENSG00000137942  
ENSG00000137944  
ENSG00000137947  
ENSG00000137959  
ENSG00000137960  
ENSG00000137962  
ENSG00000137965  
ENSG00000137968  
ENSG00000137975  
ENSG00000137992  
ENSG00000137996  
ENSG00000138018  
ENSG00000138028  
ENSG00000138030  
ENSG00000138031  
ENSG00000138032  
ENSG00000138036  
ENSG00000138039

ENSG00000138050  
ENSG00000138061  
ENSG00000138069  
ENSG00000138071  
ENSG00000138073  
ENSG00000138074  
ENSG00000138075  
ENSG00000138078  
ENSG00000138079  
ENSG00000138081  
ENSG00000138083  
ENSG00000138085  
ENSG00000138092  
ENSG00000138095  
ENSG00000138100  
ENSG00000138101  
ENSG00000138107  
ENSG00000138109  
ENSG00000138111  
ENSG00000138138  
ENSG00000138152  
ENSG00000138160  
ENSG00000138166  
ENSG00000138172  
ENSG00000138175  
ENSG00000138180  
ENSG00000138185  
ENSG00000138193  
ENSG00000138246  
ENSG00000138279  
ENSG00000138286  
ENSG00000138303  
ENSG00000138308  
ENSG00000138311  
ENSG00000138316  
ENSG00000138326  
ENSG00000138336  
ENSG00000138346

ENSG00000138347  
ENSG00000138356  
ENSG00000138376  
ENSG00000138380  
ENSG00000138395  
ENSG00000138398  
ENSG00000138399  
ENSG00000138400  
ENSG00000138413  
ENSG00000138430  
ENSG00000138434  
ENSG00000138435  
ENSG00000138439  
ENSG00000138443  
ENSG00000138448  
ENSG00000138449  
ENSG00000138463  
ENSG00000138468  
ENSG00000138472  
ENSG00000138496  
ENSG00000138592  
ENSG00000138593  
ENSG00000138594  
ENSG00000138604  
ENSG00000138606  
ENSG00000138613  
ENSG00000138614  
ENSG00000138617  
ENSG00000138621  
ENSG00000138622  
ENSG00000138623  
ENSG00000138629  
ENSG00000138639  
ENSG00000138640  
ENSG00000138641  
ENSG00000138642  
ENSG00000138650  
ENSG00000138660

ENSG00000138663  
ENSG00000138668  
ENSG00000138669  
ENSG00000138670  
ENSG00000138675  
ENSG00000138678  
ENSG00000138684  
ENSG00000138685  
ENSG00000138696  
ENSG00000138698  
ENSG00000138709  
ENSG00000138722  
ENSG00000138735  
ENSG00000138738  
ENSG00000138741  
ENSG00000138744  
ENSG00000138750  
ENSG00000138755  
ENSG00000138756  
ENSG00000138757  
ENSG00000138758  
ENSG00000138759  
ENSG00000138760  
ENSG00000138764  
ENSG00000138767  
ENSG00000138768  
ENSG00000138769  
ENSG00000138771  
ENSG00000138777  
ENSG00000138780  
ENSG00000138792  
ENSG00000138794  
ENSG00000138795  
ENSG00000138796  
ENSG00000138801  
ENSG00000138802  
ENSG00000138814  
ENSG00000138821

ENSG00000138823  
ENSG00000138829  
ENSG00000138834  
ENSG00000138835  
ENSG00000138867  
ENSG00000138892  
ENSG00000138942  
ENSG00000138944  
ENSG00000138964  
ENSG00000139044  
ENSG00000139055  
ENSG00000139083  
ENSG00000139112  
ENSG00000139117  
ENSG00000139131  
ENSG00000139132  
ENSG00000139133  
ENSG00000139146  
ENSG00000139151  
ENSG00000139154  
ENSG00000139155  
ENSG00000139160  
ENSG00000139163  
ENSG00000139168  
ENSG00000139173  
ENSG00000139174  
ENSG00000139178  
ENSG00000139180  
ENSG00000139182  
ENSG00000139187  
ENSG00000139190  
ENSG00000139192  
ENSG00000139193  
ENSG00000139194  
ENSG00000139197  
ENSG00000139200  
ENSG00000139209  
ENSG00000139211

ENSG00000139218  
ENSG00000139220  
ENSG00000139233  
ENSG00000139266  
ENSG00000139269  
ENSG00000139278  
ENSG00000139287  
ENSG00000139289  
ENSG00000139291  
ENSG00000139292  
ENSG00000139304  
ENSG00000139318  
ENSG00000139323  
ENSG00000139324  
ENSG00000139329  
ENSG00000139344  
ENSG00000139350  
ENSG00000139352  
ENSG00000139354  
ENSG00000139364  
ENSG00000139370  
ENSG00000139372  
ENSG00000139405  
ENSG00000139410  
ENSG00000139428  
ENSG00000139433  
ENSG00000139436  
ENSG00000139437  
ENSG00000139438  
ENSG00000139445  
ENSG00000139496  
ENSG00000139505  
ENSG00000139508  
ENSG00000139514  
ENSG00000139515  
ENSG00000139517  
ENSG00000139531  
ENSG00000139546

ENSG00000139547  
ENSG00000139549  
ENSG00000139567  
ENSG00000139579  
ENSG00000139597  
ENSG00000139613  
ENSG00000139618  
ENSG00000139620  
ENSG00000139624  
ENSG00000139625  
ENSG00000139626  
ENSG00000139629  
ENSG00000139631  
ENSG00000139636  
ENSG00000139641  
ENSG00000139644  
ENSG00000139645  
ENSG00000139648  
ENSG00000139651  
ENSG00000139656  
ENSG00000139668  
ENSG00000139687  
ENSG00000139697  
ENSG00000139718  
ENSG00000139719  
ENSG00000139722  
ENSG00000139725  
ENSG00000139726  
ENSG00000139734  
ENSG00000139737  
ENSG00000139746  
ENSG00000139767  
ENSG00000139793  
ENSG00000139797  
ENSG00000139800  
ENSG00000139826  
ENSG00000139835  
ENSG00000139842



ENSG00000139874  
ENSG00000139880  
ENSG00000139890  
ENSG00000139899  
ENSG00000139908  
ENSG00000139910  
ENSG00000139915  
ENSG00000139926  
ENSG00000139946  
ENSG00000139970  
ENSG00000139974  
ENSG00000139977  
ENSG00000139985  
ENSG00000139988  
ENSG00000139990  
ENSG00000139998  
ENSG00000140006  
ENSG00000140009  
ENSG00000140015  
ENSG00000140022  
ENSG00000140025  
ENSG00000140030  
ENSG00000140043  
ENSG00000140044  
ENSG00000140067  
ENSG00000140090  
ENSG00000140092  
ENSG00000140093  
ENSG00000140104  
ENSG00000140105  
ENSG00000140107  
ENSG00000140153  
ENSG00000140157  
ENSG00000140199  
ENSG00000140254  
ENSG00000140259  
ENSG00000140262  
ENSG00000140263

ENSG00000140264  
ENSG00000140265  
ENSG00000140279  
ENSG00000140280  
ENSG00000140285  
ENSG00000140297  
ENSG00000140299  
ENSG00000140307  
ENSG00000140319  
ENSG00000140320  
ENSG00000140323  
ENSG00000140326  
ENSG00000140332  
ENSG00000140350  
ENSG00000140365  
ENSG00000140367  
ENSG00000140368  
ENSG00000140374  
ENSG00000140382  
ENSG00000140386  
ENSG00000140391  
ENSG00000140396  
ENSG00000140400  
ENSG00000140403  
ENSG00000140406  
ENSG00000140416  
ENSG00000140443  
ENSG00000140450  
ENSG00000140451  
ENSG00000140455  
ENSG00000140463  
ENSG00000140464  
ENSG00000140465  
ENSG00000140470  
ENSG00000140474  
ENSG00000140478  
ENSG00000140479  
ENSG00000140481

ENSG00000140488  
ENSG00000140497  
ENSG00000140511  
ENSG00000140521  
ENSG00000140525  
ENSG00000140526  
ENSG00000140527  
ENSG00000140538  
ENSG00000140543  
ENSG00000140545  
ENSG00000140548  
ENSG00000140553  
ENSG00000140557  
ENSG00000140563  
ENSG00000140564  
ENSG00000140575  
ENSG00000140577  
ENSG00000140598  
ENSG00000140600  
ENSG00000140612  
ENSG00000140632  
ENSG00000140650  
ENSG00000140678  
ENSG00000140682  
ENSG00000140688  
ENSG00000140691  
ENSG00000140694  
ENSG00000140718  
ENSG00000140743  
ENSG00000140750  
ENSG00000140795  
ENSG00000140807  
ENSG00000140829  
ENSG00000140830  
ENSG00000140832  
ENSG00000140835  
ENSG00000140836  
ENSG00000140839

ENSG00000140848  
ENSG00000140853  
ENSG00000140859  
ENSG00000140873  
ENSG00000140905  
ENSG00000140931  
ENSG00000140932  
ENSG00000140937  
ENSG00000140939  
ENSG00000140941  
ENSG00000140943  
ENSG00000140945  
ENSG00000140948  
ENSG00000140950  
ENSG00000140955  
ENSG00000140961  
ENSG00000140968  
ENSG00000140983  
ENSG00000140987  
ENSG00000140992  
ENSG00000140995  
ENSG00000141002  
ENSG00000141012  
ENSG00000141013  
ENSG00000141026  
ENSG00000141027  
ENSG00000141030  
ENSG00000141034  
ENSG00000141040  
ENSG00000141052  
ENSG00000141068  
ENSG00000141084  
ENSG00000141086  
ENSG00000141098  
ENSG00000141101  
ENSG00000141161  
ENSG00000141179  
ENSG00000141219

ENSG00000141252  
ENSG00000141258  
ENSG00000141293  
ENSG00000141294  
ENSG00000141295  
ENSG00000141298  
ENSG00000141314  
ENSG00000141337  
ENSG00000141349  
ENSG00000141367  
ENSG00000141376  
ENSG00000141380  
ENSG00000141384  
ENSG00000141385  
ENSG00000141391  
ENSG00000141401  
ENSG00000141404  
ENSG00000141424  
ENSG00000141425  
ENSG00000141428  
ENSG00000141429  
ENSG00000141431  
ENSG00000141433  
ENSG00000141437  
ENSG00000141441  
ENSG00000141446  
ENSG00000141447  
ENSG00000141448  
ENSG00000141458  
ENSG00000141469  
ENSG00000141480  
ENSG00000141485  
ENSG00000141497  
ENSG00000141503  
ENSG00000141504  
ENSG00000141505  
ENSG00000141506  
ENSG00000141510

ENSG00000141519  
ENSG00000141522  
ENSG00000141524  
ENSG00000141526  
ENSG00000141527  
ENSG00000141540  
ENSG00000141542  
ENSG00000141551  
ENSG00000141552  
ENSG00000141556  
ENSG00000141562  
ENSG00000141564  
ENSG00000141568  
ENSG00000141569  
ENSG00000141570  
ENSG00000141574  
ENSG00000141576  
ENSG00000141577  
ENSG00000141579  
ENSG00000141580  
ENSG00000141622  
ENSG00000141627  
ENSG00000141639  
ENSG00000141642  
ENSG00000141644  
ENSG00000141646  
ENSG00000141655  
ENSG00000141664  
ENSG00000141668  
ENSG00000141682  
ENSG00000141696  
ENSG00000141698  
ENSG00000141699  
ENSG00000141736  
ENSG00000141738  
ENSG00000141741  
ENSG00000141750  
ENSG00000141753

ENSG00000141756  
ENSG00000141759  
ENSG00000141837  
ENSG00000141867  
ENSG00000141873  
ENSG00000141905  
ENSG00000141946  
ENSG00000141956  
ENSG00000141959  
ENSG00000141965  
ENSG00000141971  
ENSG00000141985  
ENSG00000142002  
ENSG00000142025  
ENSG00000142039  
ENSG00000142046  
ENSG00000142065  
ENSG00000142082  
ENSG00000142089  
ENSG00000142102  
ENSG00000142149  
ENSG00000142156  
ENSG00000142166  
ENSG00000142173  
ENSG00000142178  
ENSG00000142185  
ENSG00000142188  
ENSG00000142192  
ENSG00000142207  
ENSG00000142208  
ENSG00000142224  
ENSG00000142230  
ENSG00000142235  
ENSG00000142252  
ENSG00000142273  
ENSG00000142319  
ENSG00000142405  
ENSG00000142408

ENSG00000142409  
ENSG00000142444  
ENSG00000142449  
ENSG00000142453  
ENSG00000142459  
ENSG00000142494  
ENSG00000142512  
ENSG00000142515  
ENSG00000142530  
ENSG00000142541  
ENSG00000142544  
ENSG00000142546  
ENSG00000142549  
ENSG00000142552  
ENSG00000142556  
ENSG00000142583  
ENSG00000142599  
ENSG00000142611  
ENSG00000142619  
ENSG00000142621  
ENSG00000142623  
ENSG00000142634  
ENSG00000142657  
ENSG00000142661  
ENSG00000142675  
ENSG00000142677  
ENSG00000142684  
ENSG00000142686  
ENSG00000142687  
ENSG00000142694  
ENSG00000142700  
ENSG00000142751  
ENSG00000142784  
ENSG00000142794  
ENSG00000142856  
ENSG00000142864  
ENSG00000142867  
ENSG00000142871



ENSG00000142875  
ENSG00000142892  
ENSG00000142920  
ENSG00000142949  
ENSG00000142959  
ENSG00000142961  
ENSG00000142973  
ENSG00000143006  
ENSG00000143013  
ENSG00000143028  
ENSG00000143036  
ENSG00000143061  
ENSG00000143067  
ENSG00000143079  
ENSG00000143093  
ENSG00000143106  
ENSG00000143107  
ENSG00000143119  
ENSG00000143126  
ENSG00000143127  
ENSG00000143147  
ENSG00000143153  
ENSG00000143155  
ENSG00000143157  
ENSG00000143158  
ENSG00000143162  
ENSG00000143164  
ENSG00000143167  
ENSG00000143171  
ENSG00000143178  
ENSG00000143179  
ENSG00000143183  
ENSG00000143184  
ENSG00000143185  
ENSG00000143190  
ENSG00000143194  
ENSG00000143195  
ENSG00000143196

ENSG00000143199  
ENSG00000143217  
ENSG00000143222  
ENSG00000143226  
ENSG00000143252  
ENSG00000143257  
ENSG00000143258  
ENSG00000143294  
ENSG00000143297  
ENSG00000143314  
ENSG00000143315  
ENSG00000143318  
ENSG00000143319  
ENSG00000143320  
ENSG00000143321  
ENSG00000143322  
ENSG00000143324  
ENSG00000143333  
ENSG00000143337  
ENSG00000143340  
ENSG00000143344  
ENSG00000143355  
ENSG00000143363  
ENSG00000143365  
ENSG00000143367  
ENSG00000143369  
ENSG00000143374  
ENSG00000143375  
ENSG00000143376  
ENSG00000143382  
ENSG00000143384  
ENSG00000143387  
ENSG00000143390  
ENSG00000143393  
ENSG00000143398  
ENSG00000143401  
ENSG00000143409  
ENSG00000143418

ENSG00000143420  
ENSG00000143434  
ENSG00000143437  
ENSG00000143442  
ENSG00000143443  
ENSG00000143450  
ENSG00000143452  
ENSG00000143457  
ENSG00000143458  
ENSG00000143469  
ENSG00000143473  
ENSG00000143476  
ENSG00000143493  
ENSG00000143494  
ENSG00000143498  
ENSG00000143502  
ENSG00000143512  
ENSG00000143514  
ENSG00000143515  
ENSG00000143520  
ENSG00000143536  
ENSG00000143537  
ENSG00000143545  
ENSG00000143549  
ENSG00000143553  
ENSG00000143569  
ENSG00000143570  
ENSG00000143575  
ENSG00000143578  
ENSG00000143590  
ENSG00000143595  
ENSG00000143603  
ENSG00000143612  
ENSG00000143614  
ENSG00000143622  
ENSG00000143624  
ENSG00000143627  
ENSG00000143630

ENSG00000143633  
ENSG00000143641  
ENSG00000143643  
ENSG00000143653  
ENSG00000143669  
ENSG00000143674  
ENSG00000143702  
ENSG00000143740  
ENSG00000143742  
ENSG00000143748  
ENSG00000143751  
ENSG00000143753  
ENSG00000143756  
ENSG00000143761  
ENSG00000143768  
ENSG00000143771  
ENSG00000143772  
ENSG00000143776  
ENSG00000143786  
ENSG00000143793  
ENSG00000143797  
ENSG00000143799  
ENSG00000143801  
ENSG00000143811  
ENSG00000143815  
ENSG00000143819  
ENSG00000143842  
ENSG00000143845  
ENSG00000143847  
ENSG00000143850  
ENSG00000143851  
ENSG00000143858  
ENSG00000143862  
ENSG00000143867  
ENSG00000143870  
ENSG00000143878  
ENSG00000143882  
ENSG00000143891

ENSG00000143919  
ENSG00000143921  
ENSG00000143924  
ENSG00000143947  
ENSG00000143952  
ENSG00000143970  
ENSG00000143977  
ENSG00000143994  
ENSG00000143995  
ENSG00000144021  
ENSG00000144026  
ENSG00000144028  
ENSG00000144029  
ENSG00000144031  
ENSG00000144035  
ENSG00000144036  
ENSG00000144040  
ENSG00000144043  
ENSG00000144048  
ENSG00000144057  
ENSG00000144063  
ENSG00000144115  
ENSG00000144118  
ENSG00000144119  
ENSG00000144130  
ENSG00000144134  
ENSG00000144136  
ENSG00000144152  
ENSG00000144161  
ENSG00000144191  
ENSG00000144218  
ENSG00000144224  
ENSG00000144227  
ENSG00000144228  
ENSG00000144229  
ENSG00000144230  
ENSG00000144231  
ENSG00000144233

ENSG00000144278  
ENSG00000144285  
ENSG00000144290  
ENSG00000144306  
ENSG00000144320  
ENSG00000144331  
ENSG00000144354  
ENSG00000144355  
ENSG00000144357  
ENSG00000144366  
ENSG00000144369  
ENSG00000144381  
ENSG00000144401  
ENSG00000144406  
ENSG00000144407  
ENSG00000144445  
ENSG00000144451  
ENSG00000144452  
ENSG00000144455  
ENSG00000144460  
ENSG00000144468  
ENSG00000144476  
ENSG00000144481  
ENSG00000144485  
ENSG00000144488  
ENSG00000144524  
ENSG00000144535  
ENSG00000144550  
ENSG00000144554  
ENSG00000144559  
ENSG00000144560  
ENSG00000144566  
ENSG00000144567  
ENSG00000144579  
ENSG00000144580  
ENSG00000144583  
ENSG00000144591  
ENSG00000144596

ENSG00000144597  
ENSG00000144619  
ENSG00000144642  
ENSG00000144644  
ENSG00000144645  
ENSG00000144647  
ENSG00000144648  
ENSG00000144649  
ENSG00000144655  
ENSG00000144659  
ENSG00000144674  
ENSG00000144677  
ENSG00000144681  
ENSG00000144711  
ENSG00000144712  
ENSG00000144713  
ENSG00000144724  
ENSG00000144730  
ENSG00000144736  
ENSG00000144744  
ENSG00000144746  
ENSG00000144749  
ENSG00000144791  
ENSG00000144792  
ENSG00000144815  
ENSG00000144820  
ENSG00000144821  
ENSG00000144824  
ENSG00000144827  
ENSG00000144834  
ENSG00000144837  
ENSG00000144840  
ENSG00000144843  
ENSG00000144847  
ENSG00000144848  
ENSG00000144852  
ENSG00000144857  
ENSG00000144867

ENSG00000144868  
ENSG00000144891  
ENSG00000144895  
ENSG00000144908  
ENSG00000144909  
ENSG00000144935  
ENSG00000144959  
ENSG00000145002  
ENSG00000145012  
ENSG00000145014  
ENSG00000145016  
ENSG00000145020  
ENSG00000145022  
ENSG00000145029  
ENSG00000145040  
ENSG00000145041  
ENSG00000145050  
ENSG00000145087  
ENSG00000145088  
ENSG00000145103  
ENSG00000145113  
ENSG00000145147  
ENSG00000145191  
ENSG00000145192  
ENSG00000145194  
ENSG00000145214  
ENSG00000145216  
ENSG00000145217  
ENSG00000145242  
ENSG00000145244  
ENSG00000145246  
ENSG00000145248  
ENSG00000145283  
ENSG00000145284  
ENSG00000145287  
ENSG00000145293  
ENSG00000145331  
ENSG00000145332



ENSG00000145335  
ENSG00000145337  
ENSG00000145348  
ENSG00000145349  
ENSG00000145354  
ENSG00000145358  
ENSG00000145362  
ENSG00000145365  
ENSG00000145375  
ENSG00000145384  
ENSG00000145386  
ENSG00000145388  
ENSG00000145390  
ENSG00000145391  
ENSG00000145416  
ENSG00000145431  
ENSG00000145439  
ENSG00000145451  
ENSG00000145495  
ENSG00000145506  
ENSG00000145526  
ENSG00000145536  
ENSG00000145545  
ENSG00000145555  
ENSG00000145569  
ENSG00000145592  
ENSG00000145604  
ENSG00000145623  
ENSG00000145626  
ENSG00000145632  
ENSG00000145675  
ENSG00000145681  
ENSG00000145685  
ENSG00000145687  
ENSG00000145692  
ENSG00000145703  
ENSG00000145715  
ENSG00000145723

ENSG00000145725  
ENSG00000145730  
ENSG00000145734  
ENSG00000145740  
ENSG00000145743  
ENSG00000145757  
ENSG00000145777  
ENSG00000145779  
ENSG00000145780  
ENSG00000145782  
ENSG00000145794  
ENSG00000145817  
ENSG00000145819  
ENSG00000145824  
ENSG00000145832  
ENSG00000145833  
ENSG00000145860  
ENSG00000145861  
ENSG00000145863  
ENSG00000145864  
ENSG00000145879  
ENSG00000145882  
ENSG00000145888  
ENSG00000145901  
ENSG00000145907  
ENSG00000145908  
ENSG00000145911  
ENSG00000145916  
ENSG00000145919  
ENSG00000145920  
ENSG00000145945  
ENSG00000145949  
ENSG00000145979  
ENSG00000145990  
ENSG00000145996  
ENSG00000146005  
ENSG00000146006  
ENSG00000146007

ENSG00000146021  
ENSG00000146038  
ENSG00000146039  
ENSG00000146049  
ENSG00000146054  
ENSG00000146063  
ENSG00000146066  
ENSG00000146070  
ENSG00000146072  
ENSG00000146083  
ENSG00000146085  
ENSG00000146109  
ENSG00000146112  
ENSG00000146122  
ENSG00000146147  
ENSG00000146151  
ENSG00000146166  
ENSG00000146192  
ENSG00000146197  
ENSG00000146205  
ENSG00000146215  
ENSG00000146216  
ENSG00000146223  
ENSG00000146232  
ENSG00000146233  
ENSG00000146242  
ENSG00000146243  
ENSG00000146247  
ENSG00000146250  
ENSG00000146263  
ENSG00000146267  
ENSG00000146276  
ENSG00000146278  
ENSG00000146281  
ENSG00000146282  
ENSG00000146285  
ENSG00000146350  
ENSG00000146352

ENSG00000146360  
ENSG00000146373  
ENSG00000146374  
ENSG00000146409  
ENSG00000146410  
ENSG00000146411  
ENSG00000146414  
ENSG00000146416  
ENSG00000146426  
ENSG00000146433  
ENSG00000146453  
ENSG00000146457  
ENSG00000146463  
ENSG00000146469  
ENSG00000146476  
ENSG00000146477  
ENSG00000146535  
ENSG00000146540  
ENSG00000146555  
ENSG00000146576  
ENSG00000146587  
ENSG00000146592  
ENSG00000146648  
ENSG00000146670  
ENSG00000146674  
ENSG00000146676  
ENSG00000146678  
ENSG00000146700  
ENSG00000146701  
ENSG00000146707  
ENSG00000146731  
ENSG00000146733  
ENSG00000146755  
ENSG00000146776  
ENSG00000146802  
ENSG00000146809  
ENSG00000146826  
ENSG00000146828

ENSG00000146830  
ENSG00000146833  
ENSG00000146834  
ENSG00000146842  
ENSG00000146856  
ENSG00000146858  
ENSG00000146859  
ENSG00000146872  
ENSG00000146904  
ENSG00000146909  
ENSG00000146910  
ENSG00000146918  
ENSG00000146926  
ENSG00000146938  
ENSG00000146950  
ENSG00000146955  
ENSG00000146963  
ENSG00000146966  
ENSG00000147003  
ENSG00000147010  
ENSG00000147027  
ENSG00000147036  
ENSG00000147041  
ENSG00000147044  
ENSG00000147059  
ENSG00000147065  
ENSG00000147099  
ENSG00000147100  
ENSG00000147113  
ENSG00000147117  
ENSG00000147118  
ENSG00000147121  
ENSG00000147124  
ENSG00000147130  
ENSG00000147133  
ENSG00000147138  
ENSG00000147140  
ENSG00000147144

ENSG00000147145  
ENSG00000147155  
ENSG00000147160  
ENSG00000147162  
ENSG00000147164  
ENSG00000147168  
ENSG00000147183  
ENSG00000147202  
ENSG00000147223  
ENSG00000147234  
ENSG00000147246  
ENSG00000147251  
ENSG00000147255  
ENSG00000147256  
ENSG00000147257  
ENSG00000147262  
ENSG00000147274  
ENSG00000147316  
ENSG00000147324  
ENSG00000147364  
ENSG00000147378  
ENSG00000147383  
ENSG00000147394  
ENSG00000147400  
ENSG00000147403  
ENSG00000147408  
ENSG00000147416  
ENSG00000147419  
ENSG00000147421  
ENSG00000147434  
ENSG00000147439  
ENSG00000147443  
ENSG00000147454  
ENSG00000147457  
ENSG00000147459  
ENSG00000147465  
ENSG00000147471  
ENSG00000147475

ENSG00000147481  
ENSG00000147488  
ENSG00000147509  
ENSG00000147526  
ENSG00000147533  
ENSG00000147535  
ENSG00000147536  
ENSG00000147548  
ENSG00000147570  
ENSG00000147588  
ENSG00000147596  
ENSG00000147601  
ENSG00000147606  
ENSG00000147614  
ENSG00000147647  
ENSG00000147649  
ENSG00000147650  
ENSG00000147655  
ENSG00000147669  
ENSG00000147676  
ENSG00000147679  
ENSG00000147689  
ENSG00000147697  
ENSG00000147724  
ENSG00000147789  
ENSG00000147799  
ENSG00000147852  
ENSG00000147853  
ENSG00000147854  
ENSG00000147862  
ENSG00000147872  
ENSG00000147874  
ENSG00000147883  
ENSG00000147889  
ENSG00000147894  
ENSG00000147905  
ENSG00000147912  
ENSG00000147955

ENSG00000147996  
ENSG00000148019  
ENSG00000148053  
ENSG00000148082  
ENSG00000148090  
ENSG00000148110  
ENSG00000148120  
ENSG00000148123  
ENSG00000148143  
ENSG00000148154  
ENSG00000148158  
ENSG00000148175  
ENSG00000148180  
ENSG00000148187  
ENSG00000148200  
ENSG00000148204  
ENSG00000148218  
ENSG00000148219  
ENSG00000148225  
ENSG00000148229  
ENSG00000148248  
ENSG00000148288  
ENSG00000148296  
ENSG00000148297  
ENSG00000148300  
ENSG00000148308  
ENSG00000148331  
ENSG00000148334  
ENSG00000148335  
ENSG00000148339  
ENSG00000148341  
ENSG00000148343  
ENSG00000148344  
ENSG00000148356  
ENSG00000148358  
ENSG00000148362  
ENSG00000148377  
ENSG00000148384



ENSG00000148396  
ENSG00000148399  
ENSG00000148400  
ENSG00000148408  
ENSG00000148411  
ENSG00000148426  
ENSG00000148429  
ENSG00000148444  
ENSG00000148450  
ENSG00000148468  
ENSG00000148483  
ENSG00000148484  
ENSG00000148488  
ENSG00000148498  
ENSG00000148513  
ENSG00000148516  
ENSG00000148541  
ENSG00000148572  
ENSG00000148584  
ENSG00000148600  
ENSG00000148604  
ENSG00000148606  
ENSG00000148634  
ENSG00000148660  
ENSG00000148672  
ENSG00000148677  
ENSG00000148680  
ENSG00000148688  
ENSG00000148690  
ENSG00000148700  
ENSG00000148702  
ENSG00000148704  
ENSG00000148719  
ENSG00000148730  
ENSG00000148735  
ENSG00000148737  
ENSG00000148773  
ENSG00000148798

ENSG00000148803  
ENSG00000148814  
ENSG00000148824  
ENSG00000148826  
ENSG00000148832  
ENSG00000148835  
ENSG00000148840  
ENSG00000148841  
ENSG00000148843  
ENSG00000148848  
ENSG00000148908  
ENSG00000148925  
ENSG00000148926  
ENSG00000148935  
ENSG00000148942  
ENSG00000148943  
ENSG00000148948  
ENSG00000148950  
ENSG00000148985  
ENSG00000149054  
ENSG00000149090  
ENSG00000149091  
ENSG00000149115  
ENSG00000149124  
ENSG00000149150  
ENSG00000149177  
ENSG00000149179  
ENSG00000149182  
ENSG00000149187  
ENSG00000149196  
ENSG00000149212  
ENSG00000149218  
ENSG00000149256  
ENSG00000149257  
ENSG00000149260  
ENSG00000149269  
ENSG00000149273  
ENSG00000149289

ENSG00000149294  
ENSG00000149295  
ENSG00000149300  
ENSG00000149305  
ENSG00000149308  
ENSG00000149311  
ENSG00000149313  
ENSG00000149328  
ENSG00000149346  
ENSG00000149357  
ENSG00000149380  
ENSG00000149403  
ENSG00000149418  
ENSG00000149428  
ENSG00000149451  
ENSG00000149452  
ENSG00000149474  
ENSG00000149476  
ENSG00000149480  
ENSG00000149483  
ENSG00000149485  
ENSG00000149503  
ENSG00000149516  
ENSG00000149527  
ENSG00000149532  
ENSG00000149534  
ENSG00000149541  
ENSG00000149547  
ENSG00000149548  
ENSG00000149554  
ENSG00000149557  
ENSG00000149571  
ENSG00000149573  
ENSG00000149575  
ENSG00000149577  
ENSG00000149582  
ENSG00000149591  
ENSG00000149596

ENSG00000149599  
ENSG00000149600  
ENSG00000149633  
ENSG00000149635  
ENSG00000149636  
ENSG00000149639  
ENSG00000149646  
ENSG00000149654  
ENSG00000149657  
ENSG00000149658  
ENSG00000149679  
ENSG00000149716  
ENSG00000149742  
ENSG00000149781  
ENSG00000149782  
ENSG00000149792  
ENSG00000149798  
ENSG00000149823  
ENSG00000149922  
ENSG00000149923  
ENSG00000149925  
ENSG00000149926  
ENSG00000149927  
ENSG00000149929  
ENSG00000149930  
ENSG00000149948  
ENSG00000149968  
ENSG00000149970  
ENSG00000149972  
ENSG00000150048  
ENSG00000150054  
ENSG00000150076  
ENSG00000150093  
ENSG00000150201  
ENSG00000150244  
ENSG00000150275  
ENSG00000150281  
ENSG00000150316

ENSG00000150337  
ENSG00000150347  
ENSG00000150394  
ENSG00000150401  
ENSG00000150403  
ENSG00000150433  
ENSG00000150455  
ENSG00000150457  
ENSG00000150459  
ENSG00000150471  
ENSG00000150477  
ENSG00000150510  
ENSG00000150526  
ENSG00000150540  
ENSG00000150551  
ENSG00000150556  
ENSG00000150593  
ENSG00000150594  
ENSG00000150625  
ENSG00000150627  
ENSG00000150636  
ENSG00000150637  
ENSG00000150656  
ENSG00000150667  
ENSG00000150672  
ENSG00000150676  
ENSG00000150681  
ENSG00000150687  
ENSG00000150712  
ENSG00000150722  
ENSG00000150753  
ENSG00000150756  
ENSG00000150760  
ENSG00000150764  
ENSG00000150768  
ENSG00000150776  
ENSG00000150779  
ENSG00000150782

ENSG00000150787  
ENSG00000150867  
ENSG00000150873  
ENSG00000150893  
ENSG00000150907  
ENSG00000150938  
ENSG00000150967  
ENSG00000150977  
ENSG00000150990  
ENSG00000150995  
ENSG00000151005  
ENSG00000151012  
ENSG00000151014  
ENSG00000151023  
ENSG00000151025  
ENSG00000151062  
ENSG00000151065  
ENSG00000151067  
ENSG00000151090  
ENSG00000151092  
ENSG00000151116  
ENSG00000151117  
ENSG00000151135  
ENSG00000151136  
ENSG00000151148  
ENSG00000151150  
ENSG00000151151  
ENSG00000151164  
ENSG00000151176  
ENSG00000151208  
ENSG00000151224  
ENSG00000151229  
ENSG00000151233  
ENSG00000151239  
ENSG00000151240  
ENSG00000151247  
ENSG00000151276  
ENSG00000151292

ENSG00000151304  
ENSG00000151320  
ENSG00000151322  
ENSG00000151327  
ENSG00000151332  
ENSG00000151338  
ENSG00000151348  
ENSG00000151353  
ENSG00000151364  
ENSG00000151365  
ENSG00000151366  
ENSG00000151413  
ENSG00000151414  
ENSG00000151422  
ENSG00000151445  
ENSG00000151458  
ENSG00000151461  
ENSG00000151465  
ENSG00000151466  
ENSG00000151468  
ENSG00000151470  
ENSG00000151474  
ENSG00000151490  
ENSG00000151491  
ENSG00000151498  
ENSG00000151500  
ENSG00000151502  
ENSG00000151503  
ENSG00000151532  
ENSG00000151552  
ENSG00000151553  
ENSG00000151572  
ENSG00000151575  
ENSG00000151576  
ENSG00000151577  
ENSG00000151611  
ENSG00000151612  
ENSG00000151615

ENSG00000151617  
ENSG00000151623  
ENSG00000151632  
ENSG00000151640  
ENSG00000151650  
ENSG00000151651  
ENSG00000151657  
ENSG00000151665  
ENSG00000151687  
ENSG00000151692  
ENSG00000151693  
ENSG00000151694  
ENSG00000151702  
ENSG00000151704  
ENSG00000151715  
ENSG00000151718  
ENSG00000151726  
ENSG00000151729  
ENSG00000151743  
ENSG00000151746  
ENSG00000151748  
ENSG00000151778  
ENSG00000151789  
ENSG00000151806  
ENSG00000151834  
ENSG00000151849  
ENSG00000151876  
ENSG00000151881  
ENSG00000151882  
ENSG00000151883  
ENSG00000151892  
ENSG00000151893  
ENSG00000151914  
ENSG00000151917  
ENSG00000151923  
ENSG00000151929  
ENSG00000151948  
ENSG00000151952



ENSG00000151962  
ENSG00000152034  
ENSG00000152049  
ENSG00000152056  
ENSG00000152061  
ENSG00000152078  
ENSG00000152086  
ENSG00000152092  
ENSG00000152102  
ENSG00000152104  
ENSG00000152127  
ENSG00000152128  
ENSG00000152133  
ENSG00000152137  
ENSG00000152154  
ENSG00000152192  
ENSG00000152193  
ENSG00000152207  
ENSG00000152208  
ENSG00000152213  
ENSG00000152217  
ENSG00000152219  
ENSG00000152223  
ENSG00000152229  
ENSG00000152242  
ENSG00000152254  
ENSG00000152256  
ENSG00000152270  
ENSG00000152284  
ENSG00000152291  
ENSG00000152315  
ENSG00000152332  
ENSG00000152348  
ENSG00000152359  
ENSG00000152377  
ENSG00000152380  
ENSG00000152382  
ENSG00000152402

ENSG00000152404  
ENSG00000152409  
ENSG00000152413  
ENSG00000152430  
ENSG00000152433  
ENSG00000152439  
ENSG00000152443  
ENSG00000152455  
ENSG00000152457  
ENSG00000152463  
ENSG00000152465  
ENSG00000152467  
ENSG00000152475  
ENSG00000152484  
ENSG00000152492  
ENSG00000152495  
ENSG00000152503  
ENSG00000152518  
ENSG00000152520  
ENSG00000152527  
ENSG00000152556  
ENSG00000152558  
ENSG00000152578  
ENSG00000152582  
ENSG00000152592  
ENSG00000152601  
ENSG00000152620  
ENSG00000152642  
ENSG00000152661  
ENSG00000152669  
ENSG00000152670  
ENSG00000152683  
ENSG00000152684  
ENSG00000152689  
ENSG00000152700  
ENSG00000152749  
ENSG00000152760  
ENSG00000152763

ENSG00000152766  
ENSG00000152767  
ENSG00000152778  
ENSG00000152779  
ENSG00000152782  
ENSG00000152784  
ENSG00000152785  
ENSG00000152795  
ENSG00000152804  
ENSG00000152818  
ENSG00000152822  
ENSG00000152894  
ENSG00000152904  
ENSG00000152910  
ENSG00000152926  
ENSG00000152932  
ENSG00000152936  
ENSG00000152944  
ENSG00000152952  
ENSG00000152953  
ENSG00000152954  
ENSG00000152969  
ENSG00000152977  
ENSG00000152990  
ENSG00000153006  
ENSG00000153012  
ENSG00000153015  
ENSG00000153029  
ENSG00000153037  
ENSG00000153044  
ENSG00000153046  
ENSG00000153048  
ENSG00000153064  
ENSG00000153071  
ENSG00000153093  
ENSG00000153094  
ENSG00000153107  
ENSG00000153113

ENSG00000153130  
ENSG00000153147  
ENSG00000153162  
ENSG00000153165  
ENSG00000153179  
ENSG00000153187  
ENSG00000153201  
ENSG00000153207  
ENSG00000153214  
ENSG00000153233  
ENSG00000153234  
ENSG00000153246  
ENSG00000153250  
ENSG00000153253  
ENSG00000153266  
ENSG00000153283  
ENSG00000153291  
ENSG00000153292  
ENSG00000153294  
ENSG00000153303  
ENSG00000153310  
ENSG00000153317  
ENSG00000153339  
ENSG00000153391  
ENSG00000153395  
ENSG00000153404  
ENSG00000153406  
ENSG00000153443  
ENSG00000153446  
ENSG00000153485  
ENSG00000153487  
ENSG00000153531  
ENSG00000153551  
ENSG00000153558  
ENSG00000153560  
ENSG00000153561  
ENSG00000153563  
ENSG00000153574

ENSG00000153707  
ENSG00000153714  
ENSG00000153721  
ENSG00000153767  
ENSG00000153786  
ENSG00000153789  
ENSG00000153790  
ENSG00000153802  
ENSG00000153814  
ENSG00000153815  
ENSG00000153822  
ENSG00000153823  
ENSG00000153827  
ENSG00000153832  
ENSG00000153879  
ENSG00000153885  
ENSG00000153896  
ENSG00000153898  
ENSG00000153902  
ENSG00000153904  
ENSG00000153914  
ENSG00000153930  
ENSG00000153933  
ENSG00000153936  
ENSG00000153944  
ENSG00000153956  
ENSG00000153982  
ENSG00000153989  
ENSG00000153993  
ENSG00000154001  
ENSG00000154016  
ENSG00000154025  
ENSG00000154027  
ENSG00000154040  
ENSG00000154059  
ENSG00000154065  
ENSG00000154080  
ENSG00000154096

ENSG00000154102  
ENSG00000154114  
ENSG00000154118  
ENSG00000154122  
ENSG00000154124  
ENSG00000154127  
ENSG00000154133  
ENSG00000154134  
ENSG00000154143  
ENSG00000154144  
ENSG00000154146  
ENSG00000154153  
ENSG00000154162  
ENSG00000154165  
ENSG00000154174  
ENSG00000154175  
ENSG00000154188  
ENSG00000154217  
ENSG00000154222  
ENSG00000154227  
ENSG00000154229  
ENSG00000154237  
ENSG00000154265  
ENSG00000154269  
ENSG00000154274  
ENSG00000154277  
ENSG00000154310  
ENSG00000154319  
ENSG00000154328  
ENSG00000154330  
ENSG00000154359  
ENSG00000154370  
ENSG00000154380  
ENSG00000154415  
ENSG00000154429  
ENSG00000154447  
ENSG00000154451  
ENSG00000154473

ENSG00000154478  
ENSG00000154479  
ENSG00000154493  
ENSG00000154511  
ENSG00000154518  
ENSG00000154529  
ENSG00000154545  
ENSG00000154553  
ENSG00000154556  
ENSG00000154582  
ENSG00000154611  
ENSG00000154639  
ENSG00000154642  
ENSG00000154645  
ENSG00000154646  
ENSG00000154654  
ENSG00000154655  
ENSG00000154678  
ENSG00000154710  
ENSG00000154721  
ENSG00000154727  
ENSG00000154734  
ENSG00000154736  
ENSG00000154743  
ENSG00000154760  
ENSG00000154764  
ENSG00000154767  
ENSG00000154781  
ENSG00000154783  
ENSG00000154803  
ENSG00000154813  
ENSG00000154814  
ENSG00000154839  
ENSG00000154845  
ENSG00000154856  
ENSG00000154864  
ENSG00000154889  
ENSG00000154917

ENSG00000154928  
ENSG00000154930  
ENSG00000154945  
ENSG00000154957  
ENSG00000154975  
ENSG00000154978  
ENSG00000154997  
ENSG00000155008  
ENSG00000155011  
ENSG00000155016  
ENSG00000155034  
ENSG00000155052  
ENSG00000155066  
ENSG00000155085  
ENSG00000155090  
ENSG00000155093  
ENSG00000155096  
ENSG00000155097  
ENSG00000155099  
ENSG00000155100  
ENSG00000155111  
ENSG00000155158  
ENSG00000155189  
ENSG00000155252  
ENSG00000155254  
ENSG00000155256  
ENSG00000155265  
ENSG00000155269  
ENSG00000155287  
ENSG00000155324  
ENSG00000155329  
ENSG00000155330  
ENSG00000155366  
ENSG00000155380  
ENSG00000155438  
ENSG00000155465  
ENSG00000155495  
ENSG00000155506



ENSG00000155508  
ENSG00000155511  
ENSG00000155542  
ENSG00000155545  
ENSG00000155592  
ENSG00000155621  
ENSG00000155622  
ENSG00000155629  
ENSG00000155636  
ENSG00000155659  
ENSG00000155660  
ENSG00000155666  
ENSG00000155719  
ENSG00000155729  
ENSG00000155744  
ENSG00000155749  
ENSG00000155754  
ENSG00000155755  
ENSG00000155760  
ENSG00000155761  
ENSG00000155792  
ENSG00000155827  
ENSG00000155833  
ENSG00000155846  
ENSG00000155849  
ENSG00000155850  
ENSG00000155858  
ENSG00000155875  
ENSG00000155876  
ENSG00000155886  
ENSG00000155890  
ENSG00000155893  
ENSG00000155903  
ENSG00000155906  
ENSG00000155918  
ENSG00000155926  
ENSG00000155959  
ENSG00000155961

ENSG00000155962  
ENSG00000155966  
ENSG00000155970  
ENSG00000155974  
ENSG00000155975  
ENSG00000156006  
ENSG00000156009  
ENSG00000156011  
ENSG00000156017  
ENSG00000156026  
ENSG00000156030  
ENSG00000156049  
ENSG00000156050  
ENSG00000156052  
ENSG00000156097  
ENSG00000156103  
ENSG00000156113  
ENSG00000156127  
ENSG00000156136  
ENSG00000156140  
ENSG00000156150  
ENSG00000156162  
ENSG00000156170  
ENSG00000156171  
ENSG00000156172  
ENSG00000156206  
ENSG00000156218  
ENSG00000156222  
ENSG00000156232  
ENSG00000156234  
ENSG00000156253  
ENSG00000156265  
ENSG00000156269  
ENSG00000156273  
ENSG00000156304  
ENSG00000156313  
ENSG00000156345  
ENSG00000156374

ENSG00000156381  
ENSG00000156384  
ENSG00000156395  
ENSG00000156398  
ENSG00000156411  
ENSG00000156413  
ENSG00000156414  
ENSG00000156427  
ENSG00000156453  
ENSG00000156463  
ENSG00000156466  
ENSG00000156467  
ENSG00000156471  
ENSG00000156475  
ENSG00000156486  
ENSG00000156500  
ENSG00000156504  
ENSG00000156508  
ENSG00000156510  
ENSG00000156515  
ENSG00000156521  
ENSG00000156531  
ENSG00000156535  
ENSG00000156574  
ENSG00000156587  
ENSG00000156599  
ENSG00000156603  
ENSG00000156639  
ENSG00000156642  
ENSG00000156650  
ENSG00000156671  
ENSG00000156675  
ENSG00000156687  
ENSG00000156689  
ENSG00000156709  
ENSG00000156711  
ENSG00000156735  
ENSG00000156738

ENSG00000156795  
ENSG00000156802  
ENSG00000156804  
ENSG00000156853  
ENSG00000156858  
ENSG00000156860  
ENSG00000156869  
ENSG00000156873  
ENSG00000156876  
ENSG00000156886  
ENSG00000156925  
ENSG00000156958  
ENSG00000156959  
ENSG00000156966  
ENSG00000156968  
ENSG00000156973  
ENSG00000156976  
ENSG00000156983  
ENSG00000157017  
ENSG00000157036  
ENSG00000157045  
ENSG00000157064  
ENSG00000157087  
ENSG00000157093  
ENSG00000157103  
ENSG00000157106  
ENSG00000157107  
ENSG00000157110  
ENSG00000157119  
ENSG00000157150  
ENSG00000157152  
ENSG00000157168  
ENSG00000157181  
ENSG00000157191  
ENSG00000157193  
ENSG00000157211  
ENSG00000157212  
ENSG00000157214

ENSG00000157216  
ENSG00000157219  
ENSG00000157224  
ENSG00000157227  
ENSG00000157240  
ENSG00000157259  
ENSG00000157303  
ENSG00000157315  
ENSG00000157322  
ENSG00000157326  
ENSG00000157335  
ENSG00000157349  
ENSG00000157350  
ENSG00000157368  
ENSG00000157379  
ENSG00000157388  
ENSG00000157399  
ENSG00000157404  
ENSG00000157423  
ENSG00000157429  
ENSG00000157450  
ENSG00000157470  
ENSG00000157483  
ENSG00000157500  
ENSG00000157502  
ENSG00000157510  
ENSG00000157514  
ENSG00000157538  
ENSG00000157540  
ENSG00000157542  
ENSG00000157551  
ENSG00000157554  
ENSG00000157557  
ENSG00000157570  
ENSG00000157593  
ENSG00000157600  
ENSG00000157613  
ENSG00000157617

ENSG00000157625  
ENSG00000157637  
ENSG00000157653  
ENSG00000157654  
ENSG00000157657  
ENSG00000157680  
ENSG00000157693  
ENSG00000157703  
ENSG00000157734  
ENSG00000157741  
ENSG00000157765  
ENSG00000157766  
ENSG00000157778  
ENSG00000157782  
ENSG00000157796  
ENSG00000157800  
ENSG00000157823  
ENSG00000157827  
ENSG00000157833  
ENSG00000157837  
ENSG00000157851  
ENSG00000157869  
ENSG00000157870  
ENSG00000157873  
ENSG00000157895  
ENSG00000157911  
ENSG00000157916  
ENSG00000157933  
ENSG00000157954  
ENSG00000157978  
ENSG00000157985  
ENSG00000157999  
ENSG00000158006  
ENSG00000158014  
ENSG00000158023  
ENSG00000158042  
ENSG00000158050  
ENSG00000158055

ENSG00000158077  
ENSG00000158079  
ENSG00000158089  
ENSG00000158092  
ENSG00000158104  
ENSG00000158109  
ENSG00000158122  
ENSG00000158156  
ENSG00000158158  
ENSG00000158161  
ENSG00000158163  
ENSG00000158164  
ENSG00000158169  
ENSG00000158186  
ENSG00000158195  
ENSG00000158220  
ENSG00000158246  
ENSG00000158258  
ENSG00000158270  
ENSG00000158286  
ENSG00000158290  
ENSG00000158292  
ENSG00000158296  
ENSG00000158301  
ENSG00000158315  
ENSG00000158321  
ENSG00000158352  
ENSG00000158402  
ENSG00000158417  
ENSG00000158423  
ENSG00000158427  
ENSG00000158435  
ENSG00000158445  
ENSG00000158457  
ENSG00000158458  
ENSG00000158467  
ENSG00000158470  
ENSG00000158473

ENSG00000158480  
ENSG00000158481  
ENSG00000158483  
ENSG00000158485  
ENSG00000158488  
ENSG00000158526  
ENSG00000158528  
ENSG00000158545  
ENSG00000158552  
ENSG00000158555  
ENSG00000158571  
ENSG00000158604  
ENSG00000158615  
ENSG00000158623  
ENSG00000158636  
ENSG00000158669  
ENSG00000158691  
ENSG00000158710  
ENSG00000158711  
ENSG00000158714  
ENSG00000158715  
ENSG00000158716  
ENSG00000158717  
ENSG00000158747  
ENSG00000158748  
ENSG00000158769  
ENSG00000158773  
ENSG00000158786  
ENSG00000158792  
ENSG00000158793  
ENSG00000158796  
ENSG00000158805  
ENSG00000158806  
ENSG00000158813  
ENSG00000158815  
ENSG00000158816  
ENSG00000158828  
ENSG00000158850



ENSG00000158856  
ENSG00000158859  
ENSG00000158863  
ENSG00000158864  
ENSG00000158869  
ENSG00000158874  
ENSG00000158882  
ENSG00000158887  
ENSG00000158941  
ENSG00000158955  
ENSG00000158966  
ENSG00000158985  
ENSG00000159023  
ENSG00000159063  
ENSG00000159069  
ENSG00000159082  
ENSG00000159110  
ENSG00000159111  
ENSG00000159128  
ENSG00000159140  
ENSG00000159147  
ENSG00000159164  
ENSG00000159166  
ENSG00000159167  
ENSG00000159173  
ENSG00000159176  
ENSG00000159184  
ENSG00000159200  
ENSG00000159202  
ENSG00000159212  
ENSG00000159216  
ENSG00000159217  
ENSG00000159224  
ENSG00000159228  
ENSG00000159251  
ENSG00000159256  
ENSG00000159259  
ENSG00000159261

ENSG00000159263  
ENSG00000159267  
ENSG00000159289  
ENSG00000159307  
ENSG00000159314  
ENSG00000159322  
ENSG00000159335  
ENSG00000159339  
ENSG00000159346  
ENSG00000159348  
ENSG00000159352  
ENSG00000159363  
ENSG00000159374  
ENSG00000159387  
ENSG00000159388  
ENSG00000159399  
ENSG00000159409  
ENSG00000159423  
ENSG00000159433  
ENSG00000159445  
ENSG00000159450  
ENSG00000159455  
ENSG00000159459  
ENSG00000159461  
ENSG00000159479  
ENSG00000159516  
ENSG00000159579  
ENSG00000159592  
ENSG00000159593  
ENSG00000159596  
ENSG00000159618  
ENSG00000159648  
ENSG00000159658  
ENSG00000159674  
ENSG00000159685  
ENSG00000159692  
ENSG00000159720  
ENSG00000159733

ENSG00000159763  
ENSG00000159784  
ENSG00000159788  
ENSG00000159792  
ENSG00000159840  
ENSG00000159842  
ENSG00000159871  
ENSG00000159873  
ENSG00000159882  
ENSG00000159884  
ENSG00000159899  
ENSG00000159905  
ENSG00000159915  
ENSG00000159917  
ENSG00000159921  
ENSG00000159958  
ENSG00000160007  
ENSG00000160013  
ENSG00000160014  
ENSG00000160049  
ENSG00000160050  
ENSG00000160051  
ENSG00000160055  
ENSG00000160058  
ENSG00000160062  
ENSG00000160075  
ENSG00000160087  
ENSG00000160094  
ENSG00000160097  
ENSG00000160113  
ENSG00000160117  
ENSG00000160131  
ENSG00000160145  
ENSG00000160161  
ENSG00000160179  
ENSG00000160180  
ENSG00000160183  
ENSG00000160185

ENSG00000160190  
ENSG00000160191  
ENSG00000160193  
ENSG00000160199  
ENSG00000160200  
ENSG00000160202  
ENSG00000160207  
ENSG00000160209  
ENSG00000160211  
ENSG00000160213  
ENSG00000160214  
ENSG00000160216  
ENSG00000160218  
ENSG00000160219  
ENSG00000160221  
ENSG00000160223  
ENSG00000160224  
ENSG00000160226  
ENSG00000160233  
ENSG00000160255  
ENSG00000160256  
ENSG00000160271  
ENSG00000160282  
ENSG00000160284  
ENSG00000160285  
ENSG00000160293  
ENSG00000160298  
ENSG00000160305  
ENSG00000160307  
ENSG00000160310  
ENSG00000160321  
ENSG00000160323  
ENSG00000160325  
ENSG00000160326  
ENSG00000160336  
ENSG00000160345  
ENSG00000160352  
ENSG00000160360

ENSG00000160392  
ENSG00000160396  
ENSG00000160401  
ENSG00000160404  
ENSG00000160408  
ENSG00000160439  
ENSG00000160445  
ENSG00000160460  
ENSG00000160471  
ENSG00000160539  
ENSG00000160551  
ENSG00000160563  
ENSG00000160570  
ENSG00000160584  
ENSG00000160588  
ENSG00000160593  
ENSG00000160602  
ENSG00000160613  
ENSG00000160654  
ENSG00000160679  
ENSG00000160683  
ENSG00000160685  
ENSG00000160691  
ENSG00000160703  
ENSG00000160710  
ENSG00000160712  
ENSG00000160714  
ENSG00000160716  
ENSG00000160741  
ENSG00000160746  
ENSG00000160753  
ENSG00000160767  
ENSG00000160781  
ENSG00000160783  
ENSG00000160785  
ENSG00000160789  
ENSG00000160791  
ENSG00000160803

ENSG00000160808  
ENSG00000160818  
ENSG00000160856  
ENSG00000160868  
ENSG00000160870  
ENSG00000160877  
ENSG00000160882  
ENSG00000160886  
ENSG00000160888  
ENSG00000160908  
ENSG00000160917  
ENSG00000160948  
ENSG00000160953  
ENSG00000160959  
ENSG00000160961  
ENSG00000160963  
ENSG00000160973  
ENSG00000160991  
ENSG00000160993  
ENSG00000161010  
ENSG00000161011  
ENSG00000161021  
ENSG00000161040  
ENSG00000161048  
ENSG00000161055  
ENSG00000161082  
ENSG00000161091  
ENSG00000161179  
ENSG00000161180  
ENSG00000161202  
ENSG00000161203  
ENSG00000161204  
ENSG00000161217  
ENSG00000161243  
ENSG00000161249  
ENSG00000161267  
ENSG00000161270  
ENSG00000161277

ENSG00000161298  
ENSG00000161328  
ENSG00000161381  
ENSG00000161395  
ENSG00000161405  
ENSG00000161513  
ENSG00000161526  
ENSG00000161533  
ENSG00000161542  
ENSG00000161544  
ENSG00000161547  
ENSG00000161551  
ENSG00000161609  
ENSG00000161618  
ENSG00000161638  
ENSG00000161640  
ENSG00000161642  
ENSG00000161647  
ENSG00000161649  
ENSG00000161653  
ENSG00000161654  
ENSG00000161664  
ENSG00000161671  
ENSG00000161681  
ENSG00000161692  
ENSG00000161714  
ENSG00000161791  
ENSG00000161798  
ENSG00000161800  
ENSG00000161813  
ENSG00000161835  
ENSG00000161847  
ENSG00000161849  
ENSG00000161850  
ENSG00000161888  
ENSG00000161896  
ENSG00000161904  
ENSG00000161905

ENSG00000161911  
ENSG00000161921  
ENSG00000161929  
ENSG00000161940  
ENSG00000161944  
ENSG00000161955  
ENSG00000161958  
ENSG00000161960  
ENSG00000161973  
ENSG00000161980  
ENSG00000161981  
ENSG00000161999  
ENSG00000162009  
ENSG00000162032  
ENSG00000162062  
ENSG00000162063  
ENSG00000162065  
ENSG00000162066  
ENSG00000162073  
ENSG00000162086  
ENSG00000162104  
ENSG00000162105  
ENSG00000162129  
ENSG00000162139  
ENSG00000162144  
ENSG00000162174  
ENSG00000162188  
ENSG00000162194  
ENSG00000162231  
ENSG00000162236  
ENSG00000162241  
ENSG00000162267  
ENSG00000162298  
ENSG00000162300  
ENSG00000162302  
ENSG00000162341  
ENSG00000162344  
ENSG00000162365



ENSG00000162366  
ENSG00000162367  
ENSG00000162368  
ENSG00000162373  
ENSG00000162374  
ENSG00000162377  
ENSG00000162378  
ENSG00000162383  
ENSG00000162390  
ENSG00000162391  
ENSG00000162396  
ENSG00000162398  
ENSG00000162407  
ENSG00000162408  
ENSG00000162409  
ENSG00000162413  
ENSG00000162415  
ENSG00000162419  
ENSG00000162426  
ENSG00000162430  
ENSG00000162433  
ENSG00000162434  
ENSG00000162441  
ENSG00000162456  
ENSG00000162458  
ENSG00000162490  
ENSG00000162493  
ENSG00000162494  
ENSG00000162496  
ENSG00000162510  
ENSG00000162511  
ENSG00000162512  
ENSG00000162517  
ENSG00000162520  
ENSG00000162521  
ENSG00000162522  
ENSG00000162542  
ENSG00000162543

ENSG00000162545  
ENSG00000162551  
ENSG00000162552  
ENSG00000162571  
ENSG00000162576  
ENSG00000162585  
ENSG00000162591  
ENSG00000162594  
ENSG00000162595  
ENSG00000162598  
ENSG00000162599  
ENSG00000162601  
ENSG00000162607  
ENSG00000162613  
ENSG00000162614  
ENSG00000162618  
ENSG00000162621  
ENSG00000162623  
ENSG00000162627  
ENSG00000162630  
ENSG00000162631  
ENSG00000162636  
ENSG00000162639  
ENSG00000162642  
ENSG00000162645  
ENSG00000162650  
ENSG00000162654  
ENSG00000162664  
ENSG00000162670  
ENSG00000162676  
ENSG00000162687  
ENSG00000162688  
ENSG00000162692  
ENSG00000162694  
ENSG00000162695  
ENSG00000162702  
ENSG00000162704  
ENSG00000162706

ENSG00000162714  
ENSG00000162722  
ENSG00000162723  
ENSG00000162728  
ENSG00000162729  
ENSG00000162734  
ENSG00000162735  
ENSG00000162736  
ENSG00000162738  
ENSG00000162739  
ENSG00000162745  
ENSG00000162746  
ENSG00000162747  
ENSG00000162757  
ENSG00000162761  
ENSG00000162769  
ENSG00000162772  
ENSG00000162777  
ENSG00000162779  
ENSG00000162783  
ENSG00000162813  
ENSG00000162814  
ENSG00000162817  
ENSG00000162819  
ENSG00000162825  
ENSG00000162852  
ENSG00000162869  
ENSG00000162873  
ENSG00000162877  
ENSG00000162878  
ENSG00000162885  
ENSG00000162889  
ENSG00000162892  
ENSG00000162894  
ENSG00000162896  
ENSG00000162897  
ENSG00000162909  
ENSG00000162923

ENSG00000162924  
ENSG00000162927  
ENSG00000162928  
ENSG00000162929  
ENSG00000162931  
ENSG00000162944  
ENSG00000162946  
ENSG00000162949  
ENSG00000162959  
ENSG00000162971  
ENSG00000162972  
ENSG00000162975  
ENSG00000162976  
ENSG00000162981  
ENSG00000162989  
ENSG00000162992  
ENSG00000162994  
ENSG00000162998  
ENSG00000162999  
ENSG00000163002  
ENSG00000163006  
ENSG00000163013  
ENSG00000163026  
ENSG00000163029  
ENSG00000163032  
ENSG00000163040  
ENSG00000163050  
ENSG00000163053  
ENSG00000163060  
ENSG00000163064  
ENSG00000163069  
ENSG00000163071  
ENSG00000163072  
ENSG00000163082  
ENSG00000163083  
ENSG00000163092  
ENSG00000163093  
ENSG00000163104

ENSG00000163106  
ENSG00000163110  
ENSG00000163121  
ENSG00000163125  
ENSG00000163126  
ENSG00000163131  
ENSG00000163132  
ENSG00000163138  
ENSG00000163141  
ENSG00000163145  
ENSG00000163154  
ENSG00000163155  
ENSG00000163156  
ENSG00000163157  
ENSG00000163161  
ENSG00000163162  
ENSG00000163170  
ENSG00000163171  
ENSG00000163202  
ENSG00000163206  
ENSG00000163214  
ENSG00000163216  
ENSG00000163219  
ENSG00000163235  
ENSG00000163239  
ENSG00000163249  
ENSG00000163251  
ENSG00000163257  
ENSG00000163263  
ENSG00000163281  
ENSG00000163285  
ENSG00000163288  
ENSG00000163291  
ENSG00000163293  
ENSG00000163295  
ENSG00000163297  
ENSG00000163319  
ENSG00000163320

ENSG00000163322  
ENSG00000163328  
ENSG00000163331  
ENSG00000163344  
ENSG00000163346  
ENSG00000163347  
ENSG00000163348  
ENSG00000163349  
ENSG00000163359  
ENSG00000163362  
ENSG00000163374  
ENSG00000163376  
ENSG00000163377  
ENSG00000163378  
ENSG00000163380  
ENSG00000163389  
ENSG00000163393  
ENSG00000163394  
ENSG00000163399  
ENSG00000163406  
ENSG00000163412  
ENSG00000163421  
ENSG00000163428  
ENSG00000163430  
ENSG00000163431  
ENSG00000163435  
ENSG00000163444  
ENSG00000163449  
ENSG00000163462  
ENSG00000163464  
ENSG00000163466  
ENSG00000163472  
ENSG00000163479  
ENSG00000163481  
ENSG00000163482  
ENSG00000163485  
ENSG00000163491  
ENSG00000163492

ENSG00000163497  
ENSG00000163501  
ENSG00000163507  
ENSG00000163508  
ENSG00000163510  
ENSG00000163512  
ENSG00000163513  
ENSG00000163516  
ENSG00000163517  
ENSG00000163518  
ENSG00000163521  
ENSG00000163527  
ENSG00000163528  
ENSG00000163530  
ENSG00000163531  
ENSG00000163534  
ENSG00000163539  
ENSG00000163558  
ENSG00000163564  
ENSG00000163565  
ENSG00000163577  
ENSG00000163581  
ENSG00000163584  
ENSG00000163590  
ENSG00000163596  
ENSG00000163599  
ENSG00000163600  
ENSG00000163605  
ENSG00000163606  
ENSG00000163607  
ENSG00000163608  
ENSG00000163611  
ENSG00000163617  
ENSG00000163618  
ENSG00000163624  
ENSG00000163625  
ENSG00000163626  
ENSG00000163630

ENSG00000163633  
ENSG00000163635  
ENSG00000163637  
ENSG00000163638  
ENSG00000163644  
ENSG00000163646  
ENSG00000163659  
ENSG00000163673  
ENSG00000163681  
ENSG00000163683  
ENSG00000163684  
ENSG00000163689  
ENSG00000163694  
ENSG00000163697  
ENSG00000163701  
ENSG00000163703  
ENSG00000163704  
ENSG00000163705  
ENSG00000163710  
ENSG00000163714  
ENSG00000163719  
ENSG00000163728  
ENSG00000163734  
ENSG00000163735  
ENSG00000163736  
ENSG00000163737  
ENSG00000163738  
ENSG00000163743  
ENSG00000163751  
ENSG00000163754  
ENSG00000163755  
ENSG00000163762  
ENSG00000163788  
ENSG00000163793  
ENSG00000163795  
ENSG00000163798  
ENSG00000163803  
ENSG00000163806



ENSG00000163807  
ENSG00000163810  
ENSG00000163811  
ENSG00000163812  
ENSG00000163814  
ENSG00000163815  
ENSG00000163817  
ENSG00000163818  
ENSG00000163820  
ENSG00000163823  
ENSG00000163827  
ENSG00000163832  
ENSG00000163833  
ENSG00000163840  
ENSG00000163848  
ENSG00000163864  
ENSG00000163866  
ENSG00000163867  
ENSG00000163870  
ENSG00000163872  
ENSG00000163873  
ENSG00000163874  
ENSG00000163875  
ENSG00000163877  
ENSG00000163879  
ENSG00000163884  
ENSG00000163888  
ENSG00000163898  
ENSG00000163900  
ENSG00000163902  
ENSG00000163904  
ENSG00000163909  
ENSG00000163913  
ENSG00000163914  
ENSG00000163930  
ENSG00000163931  
ENSG00000163932  
ENSG00000163933

ENSG00000163939  
ENSG00000163945  
ENSG00000163946  
ENSG00000163947  
ENSG00000163950  
ENSG00000163956  
ENSG00000163958  
ENSG00000163959  
ENSG00000163960  
ENSG00000163961  
ENSG00000163964  
ENSG00000163975  
ENSG00000163995  
ENSG00000164002  
ENSG00000164007  
ENSG00000164008  
ENSG00000164010  
ENSG00000164011  
ENSG00000164022  
ENSG00000164023  
ENSG00000164024  
ENSG00000164031  
ENSG00000164032  
ENSG00000164035  
ENSG00000164038  
ENSG00000164039  
ENSG00000164040  
ENSG00000164045  
ENSG00000164048  
ENSG00000164051  
ENSG00000164054  
ENSG00000164056  
ENSG00000164061  
ENSG00000164066  
ENSG00000164070  
ENSG00000164073  
ENSG00000164074  
ENSG00000164076

ENSG00000164077  
ENSG00000164078  
ENSG00000164080  
ENSG00000164081  
ENSG00000164082  
ENSG00000164086  
ENSG00000164087  
ENSG00000164088  
ENSG00000164089  
ENSG00000164091  
ENSG00000164093  
ENSG00000164096  
ENSG00000164100  
ENSG00000164104  
ENSG00000164107  
ENSG00000164111  
ENSG00000164112  
ENSG00000164114  
ENSG00000164116  
ENSG00000164117  
ENSG00000164118  
ENSG00000164120  
ENSG00000164122  
ENSG00000164124  
ENSG00000164125  
ENSG00000164128  
ENSG00000164129  
ENSG00000164134  
ENSG00000164142  
ENSG00000164144  
ENSG00000164151  
ENSG00000164162  
ENSG00000164163  
ENSG00000164164  
ENSG00000164168  
ENSG00000164169  
ENSG00000164171  
ENSG00000164172

ENSG00000164175  
ENSG00000164176  
ENSG00000164180  
ENSG00000164181  
ENSG00000164188  
ENSG00000164190  
ENSG00000164197  
ENSG00000164209  
ENSG00000164211  
ENSG00000164219  
ENSG00000164220  
ENSG00000164236  
ENSG00000164237  
ENSG00000164241  
ENSG00000164244  
ENSG00000164251  
ENSG00000164252  
ENSG00000164253  
ENSG00000164256  
ENSG00000164270  
ENSG00000164283  
ENSG00000164284  
ENSG00000164287  
ENSG00000164291  
ENSG00000164292  
ENSG00000164294  
ENSG00000164296  
ENSG00000164300  
ENSG00000164303  
ENSG00000164305  
ENSG00000164306  
ENSG00000164307  
ENSG00000164308  
ENSG00000164318  
ENSG00000164323  
ENSG00000164325  
ENSG00000164326  
ENSG00000164327

ENSG00000164329  
ENSG00000164330  
ENSG00000164332  
ENSG00000164334  
ENSG00000164338  
ENSG00000164342  
ENSG00000164347  
ENSG00000164362  
ENSG00000164366  
ENSG00000164393  
ENSG00000164399  
ENSG00000164400  
ENSG00000164402  
ENSG00000164404  
ENSG00000164405  
ENSG00000164406  
ENSG00000164411  
ENSG00000164418  
ENSG00000164434  
ENSG00000164438  
ENSG00000164440  
ENSG00000164451  
ENSG00000164458  
ENSG00000164463  
ENSG00000164465  
ENSG00000164466  
ENSG00000164485  
ENSG00000164488  
ENSG00000164494  
ENSG00000164500  
ENSG00000164506  
ENSG00000164509  
ENSG00000164520  
ENSG00000164530  
ENSG00000164535  
ENSG00000164542  
ENSG00000164543  
ENSG00000164574

ENSG00000164576  
ENSG00000164588  
ENSG00000164591  
ENSG00000164597  
ENSG00000164600  
ENSG00000164603  
ENSG00000164604  
ENSG00000164609  
ENSG00000164610  
ENSG00000164615  
ENSG00000164619  
ENSG00000164620  
ENSG00000164626  
ENSG00000164627  
ENSG00000164631  
ENSG00000164638  
ENSG00000164649  
ENSG00000164651  
ENSG00000164659  
ENSG00000164663  
ENSG00000164675  
ENSG00000164683  
ENSG00000164684  
ENSG00000164687  
ENSG00000164690  
ENSG00000164695  
ENSG00000164713  
ENSG00000164715  
ENSG00000164729  
ENSG00000164733  
ENSG00000164741  
ENSG00000164742  
ENSG00000164743  
ENSG00000164746  
ENSG00000164749  
ENSG00000164751  
ENSG00000164756  
ENSG00000164758

ENSG00000164761  
ENSG00000164764  
ENSG00000164776  
ENSG00000164778  
ENSG00000164794  
ENSG00000164796  
ENSG00000164808  
ENSG00000164815  
ENSG00000164818  
ENSG00000164823  
ENSG00000164828  
ENSG00000164830  
ENSG00000164841  
ENSG00000164849  
ENSG00000164850  
ENSG00000164855  
ENSG00000164867  
ENSG00000164871  
ENSG00000164877  
ENSG00000164879  
ENSG00000164885  
ENSG00000164889  
ENSG00000164897  
ENSG00000164898  
ENSG00000164902  
ENSG00000164904  
ENSG00000164916  
ENSG00000164920  
ENSG00000164924  
ENSG00000164929  
ENSG00000164930  
ENSG00000164933  
ENSG00000164935  
ENSG00000164938  
ENSG00000164944  
ENSG00000164946  
ENSG00000164949  
ENSG00000164951

ENSG00000164953  
ENSG00000164967  
ENSG00000164970  
ENSG00000164975  
ENSG00000164976  
ENSG00000164978  
ENSG00000164983  
ENSG00000164985  
ENSG00000165006  
ENSG00000165023  
ENSG00000165025  
ENSG00000165028  
ENSG00000165029  
ENSG00000165030  
ENSG00000165046  
ENSG00000165055  
ENSG00000165059  
ENSG00000165060  
ENSG00000165061  
ENSG00000165066  
ENSG00000165071  
ENSG00000165091  
ENSG00000165092  
ENSG00000165097  
ENSG00000165102  
ENSG00000165105  
ENSG00000165118  
ENSG00000165119  
ENSG00000165124  
ENSG00000165125  
ENSG00000165138  
ENSG00000165152  
ENSG00000165168  
ENSG00000165169  
ENSG00000165175  
ENSG00000165185  
ENSG00000165186  
ENSG00000165188



ENSG00000165192  
ENSG00000165194  
ENSG00000165195  
ENSG00000165209  
ENSG00000165215  
ENSG00000165219  
ENSG00000165233  
ENSG00000165238  
ENSG00000165240  
ENSG00000165244  
ENSG00000165246  
ENSG00000165259  
ENSG00000165269  
ENSG00000165271  
ENSG00000165272  
ENSG00000165275  
ENSG00000165280  
ENSG00000165282  
ENSG00000165283  
ENSG00000165288  
ENSG00000165309  
ENSG00000165312  
ENSG00000165322  
ENSG00000165323  
ENSG00000165325  
ENSG00000165338  
ENSG00000165355  
ENSG00000165359  
ENSG00000165376  
ENSG00000165383  
ENSG00000165389  
ENSG00000165406  
ENSG00000165409  
ENSG00000165410  
ENSG00000165417  
ENSG00000165424  
ENSG00000165434  
ENSG00000165443

ENSG00000165449  
ENSG00000165457  
ENSG00000165458  
ENSG00000165462  
ENSG00000165471  
ENSG00000165474  
ENSG00000165475  
ENSG00000165476  
ENSG00000165478  
ENSG00000165480  
ENSG00000165490  
ENSG00000165495  
ENSG00000165501  
ENSG00000165506  
ENSG00000165507  
ENSG00000165512  
ENSG00000165516  
ENSG00000165521  
ENSG00000165526  
ENSG00000165527  
ENSG00000165533  
ENSG00000165548  
ENSG00000165553  
ENSG00000165556  
ENSG00000165566  
ENSG00000165568  
ENSG00000165572  
ENSG00000165584  
ENSG00000165588  
ENSG00000165609  
ENSG00000165617  
ENSG00000165621  
ENSG00000165623  
ENSG00000165626  
ENSG00000165632  
ENSG00000165633  
ENSG00000165643  
ENSG00000165646

ENSG00000165650  
ENSG00000165655  
ENSG00000165660  
ENSG00000165661  
ENSG00000165669  
ENSG00000165671  
ENSG00000165675  
ENSG00000165678  
ENSG00000165682  
ENSG00000165685  
ENSG00000165688  
ENSG00000165689  
ENSG00000165694  
ENSG00000165695  
ENSG00000165698  
ENSG00000165699  
ENSG00000165702  
ENSG00000165704  
ENSG00000165714  
ENSG00000165716  
ENSG00000165724  
ENSG00000165731  
ENSG00000165732  
ENSG00000165733  
ENSG00000165752  
ENSG00000165757  
ENSG00000165775  
ENSG00000165782  
ENSG00000165792  
ENSG00000165794  
ENSG00000165795  
ENSG00000165799  
ENSG00000165801  
ENSG00000165802  
ENSG00000165804  
ENSG00000165806  
ENSG00000165810  
ENSG00000165813

ENSG00000165816  
ENSG00000165821  
ENSG00000165832  
ENSG00000165861  
ENSG00000165863  
ENSG00000165868  
ENSG00000165879  
ENSG00000165891  
ENSG00000165895  
ENSG00000165898  
ENSG00000165899  
ENSG00000165905  
ENSG00000165912  
ENSG00000165914  
ENSG00000165915  
ENSG00000165917  
ENSG00000165923  
ENSG00000165929  
ENSG00000165934  
ENSG00000165943  
ENSG00000165948  
ENSG00000165949  
ENSG00000165959  
ENSG00000165966  
ENSG00000165973  
ENSG00000165983  
ENSG00000165985  
ENSG00000165995  
ENSG00000165996  
ENSG00000165997  
ENSG00000166002  
ENSG00000166006  
ENSG00000166016  
ENSG00000166024  
ENSG00000166025  
ENSG00000166037  
ENSG00000166049  
ENSG00000166068

ENSG00000166069  
ENSG00000166073  
ENSG00000166086  
ENSG00000166090  
ENSG00000166106  
ENSG00000166111  
ENSG00000166118  
ENSG00000166123  
ENSG00000166128  
ENSG00000166130  
ENSG00000166133  
ENSG00000166135  
ENSG00000166140  
ENSG00000166143  
ENSG00000166145  
ENSG00000166148  
ENSG00000166152  
ENSG00000166159  
ENSG00000166160  
ENSG00000166164  
ENSG00000166166  
ENSG00000166167  
ENSG00000166169  
ENSG00000166170  
ENSG00000166171  
ENSG00000166173  
ENSG00000166181  
ENSG00000166188  
ENSG00000166192  
ENSG00000166197  
ENSG00000166200  
ENSG00000166206  
ENSG00000166220  
ENSG00000166224  
ENSG00000166225  
ENSG00000166233  
ENSG00000166246  
ENSG00000166250

ENSG00000166257  
ENSG00000166260  
ENSG00000166261  
ENSG00000166263  
ENSG00000166266  
ENSG00000166272  
ENSG00000166275  
ENSG00000166278  
ENSG00000166289  
ENSG00000166292  
ENSG00000166295  
ENSG00000166313  
ENSG00000166317  
ENSG00000166321  
ENSG00000166323  
ENSG00000166326  
ENSG00000166329  
ENSG00000166340  
ENSG00000166342  
ENSG00000166343  
ENSG00000166348  
ENSG00000166349  
ENSG00000166351  
ENSG00000166359  
ENSG00000166387  
ENSG00000166391  
ENSG00000166396  
ENSG00000166398  
ENSG00000166402  
ENSG00000166405  
ENSG00000166411  
ENSG00000166415  
ENSG00000166426  
ENSG00000166432  
ENSG00000166435  
ENSG00000166436  
ENSG00000166439  
ENSG00000166441

ENSG00000166444  
ENSG00000166446  
ENSG00000166448  
ENSG00000166450  
ENSG00000166451  
ENSG00000166452  
ENSG00000166454  
ENSG00000166455  
ENSG00000166471  
ENSG00000166478  
ENSG00000166479  
ENSG00000166482  
ENSG00000166483  
ENSG00000166484  
ENSG00000166501  
ENSG00000166503  
ENSG00000166508  
ENSG00000166509  
ENSG00000166510  
ENSG00000166523  
ENSG00000166526  
ENSG00000166527  
ENSG00000166529  
ENSG00000166532  
ENSG00000166535  
ENSG00000166546  
ENSG00000166548  
ENSG00000166557  
ENSG00000166562  
ENSG00000166569  
ENSG00000166573  
ENSG00000166575  
ENSG00000166578  
ENSG00000166579  
ENSG00000166592  
ENSG00000166619  
ENSG00000166634  
ENSG00000166664

ENSG00000166669  
ENSG00000166676  
ENSG00000166682  
ENSG00000166689  
ENSG00000166704  
ENSG00000166707  
ENSG00000166710  
ENSG00000166716  
ENSG00000166734  
ENSG00000166736  
ENSG00000166747  
ENSG00000166750  
ENSG00000166762  
ENSG00000166780  
ENSG00000166783  
ENSG00000166793  
ENSG00000166796  
ENSG00000166797  
ENSG00000166800  
ENSG00000166801  
ENSG00000166813  
ENSG00000166819  
ENSG00000166821  
ENSG00000166822  
ENSG00000166823  
ENSG00000166828  
ENSG00000166831  
ENSG00000166833  
ENSG00000166839  
ENSG00000166840  
ENSG00000166845  
ENSG00000166847  
ENSG00000166848  
ENSG00000166851  
ENSG00000166855  
ENSG00000166856  
ENSG00000166860  
ENSG00000166862



ENSG00000166866  
ENSG00000166869  
ENSG00000166881  
ENSG00000166886  
ENSG00000166887  
ENSG00000166888  
ENSG00000166889  
ENSG00000166900  
ENSG00000166902  
ENSG00000166908  
ENSG00000166912  
ENSG00000166913  
ENSG00000166922  
ENSG00000166923  
ENSG00000166924  
ENSG00000166925  
ENSG00000166927  
ENSG00000166946  
ENSG00000166949  
ENSG00000166959  
ENSG00000166961  
ENSG00000166963  
ENSG00000166974  
ENSG00000166979  
ENSG00000166986  
ENSG00000166987  
ENSG00000166997  
ENSG00000167004  
ENSG00000167005  
ENSG00000167011  
ENSG00000167034  
ENSG00000167037  
ENSG00000167065  
ENSG00000167074  
ENSG00000167080  
ENSG00000167081  
ENSG00000167083  
ENSG00000167085

ENSG00000167088  
ENSG00000167100  
ENSG00000167103  
ENSG00000167105  
ENSG00000167106  
ENSG00000167110  
ENSG00000167112  
ENSG00000167113  
ENSG00000167114  
ENSG00000167118  
ENSG00000167123  
ENSG00000167130  
ENSG00000167131  
ENSG00000167157  
ENSG00000167165  
ENSG00000167173  
ENSG00000167178  
ENSG00000167182  
ENSG00000167183  
ENSG00000167186  
ENSG00000167191  
ENSG00000167193  
ENSG00000167195  
ENSG00000167196  
ENSG00000167202  
ENSG00000167207  
ENSG00000167208  
ENSG00000167210  
ENSG00000167216  
ENSG00000167220  
ENSG00000167232  
ENSG00000167244  
ENSG00000167257  
ENSG00000167258  
ENSG00000167272  
ENSG00000167280  
ENSG00000167281  
ENSG00000167283

ENSG00000167291  
ENSG00000167302  
ENSG00000167306  
ENSG00000167323  
ENSG00000167332  
ENSG00000167333  
ENSG00000167371  
ENSG00000167378  
ENSG00000167384  
ENSG00000167395  
ENSG00000167397  
ENSG00000167419  
ENSG00000167460  
ENSG00000167461  
ENSG00000167470  
ENSG00000167483  
ENSG00000167487  
ENSG00000167491  
ENSG00000167508  
ENSG00000167513  
ENSG00000167515  
ENSG00000167523  
ENSG00000167524  
ENSG00000167525  
ENSG00000167526  
ENSG00000167528  
ENSG00000167531  
ENSG00000167535  
ENSG00000167536  
ENSG00000167543  
ENSG00000167548  
ENSG00000167549  
ENSG00000167552  
ENSG00000167562  
ENSG00000167565  
ENSG00000167580  
ENSG00000167588  
ENSG00000167595

ENSG00000167600  
ENSG00000167601  
ENSG00000167604  
ENSG00000167612  
ENSG00000167613  
ENSG00000167614  
ENSG00000167615  
ENSG00000167619  
ENSG00000167625  
ENSG00000167632  
ENSG00000167633  
ENSG00000167635  
ENSG00000167635  
ENSG00000167642  
ENSG00000167645  
ENSG00000167653  
ENSG00000167654  
ENSG00000167656  
ENSG00000167658  
ENSG00000167670  
ENSG00000167671  
ENSG00000167676  
ENSG00000167680  
ENSG00000167693  
ENSG00000167695  
ENSG00000167701  
ENSG00000167702  
ENSG00000167703  
ENSG00000167705  
ENSG00000167711  
ENSG00000167716  
ENSG00000167720  
ENSG00000167721  
ENSG00000167723  
ENSG00000167733  
ENSG00000167740  
ENSG00000167741  
ENSG00000167747  
ENSG00000167751

ENSG00000167754  
ENSG00000167755  
ENSG00000167759  
ENSG00000167767  
ENSG00000167768  
ENSG00000167769  
ENSG00000167770  
ENSG00000167771  
ENSG00000167772  
ENSG00000167778  
ENSG00000167779  
ENSG00000167780  
ENSG00000167785  
ENSG00000167797  
ENSG00000167799  
ENSG00000167800  
ENSG00000167815  
ENSG00000167842  
ENSG00000167850  
ENSG00000167851  
ENSG00000167861  
ENSG00000167862  
ENSG00000167880  
ENSG00000167889  
ENSG00000167895  
ENSG00000167900  
ENSG00000167904  
ENSG00000167914  
ENSG00000167916  
ENSG00000167920  
ENSG00000167925  
ENSG00000167930  
ENSG00000167941  
ENSG00000167962  
ENSG00000167964  
ENSG00000167965  
ENSG00000167967  
ENSG00000167969

ENSG00000167971  
ENSG00000167972  
ENSG00000167977  
ENSG00000167978  
ENSG00000167981  
ENSG00000167984  
ENSG00000167985  
ENSG00000167986  
ENSG00000167987  
ENSG00000167994  
ENSG00000167995  
ENSG00000167996  
ENSG00000168000  
ENSG00000168002  
ENSG00000168003  
ENSG00000168004  
ENSG00000168005  
ENSG00000168014  
ENSG00000168016  
ENSG00000168032  
ENSG00000168036  
ENSG00000168040  
ENSG00000168056  
ENSG00000168060  
ENSG00000168062  
ENSG00000168065  
ENSG00000168066  
ENSG00000168067  
ENSG00000168077  
ENSG00000168079  
ENSG00000168090  
ENSG00000168092  
ENSG00000168096  
ENSG00000168101  
ENSG00000168118  
ENSG00000168135  
ENSG00000168137  
ENSG00000168140

ENSG00000168143  
ENSG00000168148  
ENSG00000168152  
ENSG00000168159  
ENSG00000168172  
ENSG00000168175  
ENSG00000168209  
ENSG00000168214  
ENSG00000168216  
ENSG00000168228  
ENSG00000168229  
ENSG00000168234  
ENSG00000168237  
ENSG00000168243  
ENSG00000168246  
ENSG00000168255  
ENSG00000168256  
ENSG00000168259  
ENSG00000168263  
ENSG00000168264  
ENSG00000168269  
ENSG00000168280  
ENSG00000168282  
ENSG00000168283  
ENSG00000168286  
ENSG00000168291  
ENSG00000168297  
ENSG00000168300  
ENSG00000168301  
ENSG00000168303  
ENSG00000168309  
ENSG00000168310  
ENSG00000168314  
ENSG00000168329  
ENSG00000168333  
ENSG00000168334  
ENSG00000168348  
ENSG00000168350

ENSG00000168356  
ENSG00000168374  
ENSG00000168385  
ENSG00000168389  
ENSG00000168393  
ENSG00000168394  
ENSG00000168395  
ENSG00000168397  
ENSG00000168398  
ENSG00000168411  
ENSG00000168418  
ENSG00000168421  
ENSG00000168438  
ENSG00000168439  
ENSG00000168447  
ENSG00000168453  
ENSG00000168461  
ENSG00000168476  
ENSG00000168477  
ENSG00000168481  
ENSG00000168484  
ENSG00000168487  
ENSG00000168488  
ENSG00000168490  
ENSG00000168491  
ENSG00000168495  
ENSG00000168496  
ENSG00000168505  
ENSG00000168509  
ENSG00000168522  
ENSG00000168530  
ENSG00000168538  
ENSG00000168539  
ENSG00000168546  
ENSG00000168556  
ENSG00000168564  
ENSG00000168566  
ENSG00000168569



ENSG00000168575  
ENSG00000168591  
ENSG00000168610  
ENSG00000168612  
ENSG00000168615  
ENSG00000168619  
ENSG00000168621  
ENSG00000168631  
ENSG00000168634  
ENSG00000168661  
ENSG00000168672  
ENSG00000168675  
ENSG00000168679  
ENSG00000168685  
ENSG00000168701  
ENSG00000168702  
ENSG00000168703  
ENSG00000168710  
ENSG00000168724  
ENSG00000168734  
ENSG00000168743  
ENSG00000168748  
ENSG00000168754  
ENSG00000168758  
ENSG00000168763  
ENSG00000168765  
ENSG00000168769  
ENSG00000168772  
ENSG00000168778  
ENSG00000168779  
ENSG00000168781  
ENSG00000168785  
ENSG00000168792  
ENSG00000168795  
ENSG00000168802  
ENSG00000168803  
ENSG00000168806  
ENSG00000168807

ENSG00000168813  
ENSG00000168818  
ENSG00000168824  
ENSG00000168826  
ENSG00000168827  
ENSG00000168843  
ENSG00000168872  
ENSG00000168874  
ENSG00000168875  
ENSG00000168876  
ENSG00000168878  
ENSG00000168883  
ENSG00000168884  
ENSG00000168887  
ENSG00000168890  
ENSG00000168894  
ENSG00000168903  
ENSG00000168904  
ENSG00000168906  
ENSG00000168907  
ENSG00000168913  
ENSG00000168916  
ENSG00000168918  
ENSG00000168924  
ENSG00000168936  
ENSG00000168938  
ENSG00000168939  
ENSG00000168944  
ENSG00000168952  
ENSG00000168958  
ENSG00000168959  
ENSG00000168961  
ENSG00000168993  
ENSG00000168994  
ENSG00000168995  
ENSG00000169006  
ENSG00000169016  
ENSG00000169018

ENSG00000169019  
ENSG00000169021  
ENSG00000169031  
ENSG00000169032  
ENSG00000169035  
ENSG00000169045  
ENSG00000169047  
ENSG00000169057  
ENSG00000169067  
ENSG00000169071  
ENSG00000169083  
ENSG00000169084  
ENSG00000169085  
ENSG00000169100  
ENSG00000169105  
ENSG00000169116  
ENSG00000169118  
ENSG00000169122  
ENSG00000169129  
ENSG00000169131  
ENSG00000169136  
ENSG00000169139  
ENSG00000169155  
ENSG00000169174  
ENSG00000169180  
ENSG00000169181  
ENSG00000169184  
ENSG00000169188  
ENSG00000169193  
ENSG00000169194  
ENSG00000169213  
ENSG00000169217  
ENSG00000169218  
ENSG00000169221  
ENSG00000169223  
ENSG00000169224  
ENSG00000169228  
ENSG00000169230

ENSG00000169239  
ENSG00000169241  
ENSG00000169242  
ENSG00000169245  
ENSG00000169247  
ENSG00000169248  
ENSG00000169251  
ENSG00000169252  
ENSG00000169255  
ENSG00000169282  
ENSG00000169291  
ENSG00000169302  
ENSG00000169313  
ENSG00000169314  
ENSG00000169330  
ENSG00000169340  
ENSG00000169347  
ENSG00000169359  
ENSG00000169372  
ENSG00000169375  
ENSG00000169379  
ENSG00000169398  
ENSG00000169403  
ENSG00000169410  
ENSG00000169413  
ENSG00000169418  
ENSG00000169427  
ENSG00000169429  
ENSG00000169432  
ENSG00000169435  
ENSG00000169439  
ENSG00000169446  
ENSG00000169474  
ENSG00000169490  
ENSG00000169495  
ENSG00000169499  
ENSG00000169504  
ENSG00000169507

ENSG00000169508  
ENSG00000169515  
ENSG00000169519  
ENSG00000169548  
ENSG00000169550  
ENSG00000169554  
ENSG00000169562  
ENSG00000169567  
ENSG00000169570  
ENSG00000169575  
ENSG00000169592  
ENSG00000169594  
ENSG00000169598  
ENSG00000169604  
ENSG00000169607  
ENSG00000169609  
ENSG00000169612  
ENSG00000169618  
ENSG00000169629  
ENSG00000169635  
ENSG00000169641  
ENSG00000169660  
ENSG00000169679  
ENSG00000169682  
ENSG00000169683  
ENSG00000169684  
ENSG00000169689  
ENSG00000169692  
ENSG00000169696  
ENSG00000169714  
ENSG00000169715  
ENSG00000169718  
ENSG00000169727  
ENSG00000169733  
ENSG00000169740  
ENSG00000169744  
ENSG00000169750  
ENSG00000169752

ENSG00000169756  
ENSG00000169758  
ENSG00000169760  
ENSG00000169762  
ENSG00000169764  
ENSG00000169777  
ENSG00000169789  
ENSG00000169807  
ENSG00000169813  
ENSG00000169814  
ENSG00000169826  
ENSG00000169836  
ENSG00000169851  
ENSG00000169855  
ENSG00000169856  
ENSG00000169857  
ENSG00000169860  
ENSG00000169862  
ENSG00000169871  
ENSG00000169877  
ENSG00000169884  
ENSG00000169891  
ENSG00000169895  
ENSG00000169896  
ENSG00000169900  
ENSG00000169903  
ENSG00000169905  
ENSG00000169908  
ENSG00000169914  
ENSG00000169919  
ENSG00000169925  
ENSG00000169926  
ENSG00000169933  
ENSG00000169951  
ENSG00000169953  
ENSG00000169957  
ENSG00000169964  
ENSG00000169967

ENSG00000169976  
ENSG00000169981  
ENSG00000169991  
ENSG00000169992  
ENSG00000170004  
ENSG00000170006  
ENSG00000170011  
ENSG00000170017  
ENSG00000170027  
ENSG00000170035  
ENSG00000170043  
ENSG00000170044  
ENSG00000170049  
ENSG00000170054  
ENSG00000170074  
ENSG00000170075  
ENSG00000170085  
ENSG00000170088  
ENSG00000170091  
ENSG00000170092  
ENSG00000170099  
ENSG00000170100  
ENSG00000170113  
ENSG00000170144  
ENSG00000170145  
ENSG00000170153  
ENSG00000170166  
ENSG00000170175  
ENSG00000170180  
ENSG00000170185  
ENSG00000170191  
ENSG00000170209  
ENSG00000170214  
ENSG00000170222  
ENSG00000170234  
ENSG00000170242  
ENSG00000170248  
ENSG00000170260

ENSG00000170262  
ENSG00000170264  
ENSG00000170265  
ENSG00000170271  
ENSG00000170275  
ENSG00000170276  
ENSG00000170279  
ENSG00000170289  
ENSG00000170290  
ENSG00000170291  
ENSG00000170296  
ENSG00000170312  
ENSG00000170324  
ENSG00000170325  
ENSG00000170340  
ENSG00000170345  
ENSG00000170348  
ENSG00000170364  
ENSG00000170365  
ENSG00000170367  
ENSG00000170370  
ENSG00000170373  
ENSG00000170374  
ENSG00000170379  
ENSG00000170381  
ENSG00000170382  
ENSG00000170390  
ENSG00000170396  
ENSG00000170412  
ENSG00000170417  
ENSG00000170419  
ENSG00000170423  
ENSG00000170425  
ENSG00000170426  
ENSG00000170439  
ENSG00000170442  
ENSG00000170454  
ENSG00000170456



ENSG00000170464  
ENSG00000170465  
ENSG00000170471  
ENSG00000170473  
ENSG00000170476  
ENSG00000170477  
ENSG00000170482  
ENSG00000170484  
ENSG00000170485  
ENSG00000170486  
ENSG00000170500  
ENSG00000170502  
ENSG00000170509  
ENSG00000170515  
ENSG00000170522  
ENSG00000170525  
ENSG00000170537  
ENSG00000170540  
ENSG00000170542  
ENSG00000170545  
ENSG00000170549  
ENSG00000170558  
ENSG00000170561  
ENSG00000170571  
ENSG00000170577  
ENSG00000170579  
ENSG00000170581  
ENSG00000170584  
ENSG00000170604  
ENSG00000170606  
ENSG00000170608  
ENSG00000170613  
ENSG00000170615  
ENSG00000170619  
ENSG00000170624  
ENSG00000170632  
ENSG00000170633  
ENSG00000170638

ENSG00000170653  
ENSG00000170677  
ENSG00000170681  
ENSG00000170689  
ENSG00000170703  
ENSG00000170734  
ENSG00000170743  
ENSG00000170745  
ENSG00000170759  
ENSG00000170776  
ENSG00000170777  
ENSG00000170779  
ENSG00000170786  
ENSG00000170788  
ENSG00000170801  
ENSG00000170802  
ENSG00000170807  
ENSG00000170820  
ENSG00000170832  
ENSG00000170836  
ENSG00000170852  
ENSG00000170854  
ENSG00000170855  
ENSG00000170871  
ENSG00000170873  
ENSG00000170876  
ENSG00000170889  
ENSG00000170891  
ENSG00000170892  
ENSG00000170893  
ENSG00000170899  
ENSG00000170903  
ENSG00000170909  
ENSG00000170915  
ENSG00000170921  
ENSG00000170925  
ENSG00000170927  
ENSG00000170946

ENSG00000170948  
ENSG00000170949  
ENSG00000170954  
ENSG00000170955  
ENSG00000170956  
ENSG00000170959  
ENSG00000170961  
ENSG00000170962  
ENSG00000170965  
ENSG00000170967  
ENSG00000170989  
ENSG00000171004  
ENSG00000171016  
ENSG00000171017  
ENSG00000171033  
ENSG00000171044  
ENSG00000171045  
ENSG00000171049  
ENSG00000171053  
ENSG00000171055  
ENSG00000171056  
ENSG00000171067  
ENSG00000171097  
ENSG00000171100  
ENSG00000171102  
ENSG00000171103  
ENSG00000171105  
ENSG00000171109  
ENSG00000171115  
ENSG00000171121  
ENSG00000171124  
ENSG00000171130  
ENSG00000171132  
ENSG00000171133  
ENSG00000171135  
ENSG00000171148  
ENSG00000171150  
ENSG00000171155

ENSG00000171160  
ENSG00000171161  
ENSG00000171163  
ENSG00000171169  
ENSG00000171189  
ENSG00000171195  
ENSG00000171201  
ENSG00000171204  
ENSG00000171206  
ENSG00000171208  
ENSG00000171209  
ENSG00000171224  
ENSG00000171227  
ENSG00000171234  
ENSG00000171236  
ENSG00000171241  
ENSG00000171243  
ENSG00000171246  
ENSG00000171262  
ENSG00000171291  
ENSG00000171295  
ENSG00000171298  
ENSG00000171302  
ENSG00000171303  
ENSG00000171310  
ENSG00000171314  
ENSG00000171316  
ENSG00000171320  
ENSG00000171345  
ENSG00000171346  
ENSG00000171357  
ENSG00000171360  
ENSG00000171365  
ENSG00000171368  
ENSG00000171385  
ENSG00000171388  
ENSG00000171396  
ENSG00000171401

ENSG00000171403  
ENSG00000171408  
ENSG00000171425  
ENSG00000171431  
ENSG00000171435  
ENSG00000171443  
ENSG00000171444  
ENSG00000171450  
ENSG00000171451  
ENSG00000171456  
ENSG00000171466  
ENSG00000171467  
ENSG00000171469  
ENSG00000171475  
ENSG00000171476  
ENSG00000171487  
ENSG00000171488  
ENSG00000171490  
ENSG00000171492  
ENSG00000171502  
ENSG00000171509  
ENSG00000171522  
ENSG00000171530  
ENSG00000171532  
ENSG00000171533  
ENSG00000171540  
ENSG00000171551  
ENSG00000171552  
ENSG00000171560  
ENSG00000171564  
ENSG00000171566  
ENSG00000171574  
ENSG00000171587  
ENSG00000171595  
ENSG00000171596  
ENSG00000171603  
ENSG00000171604  
ENSG00000171606

ENSG00000171608  
ENSG00000171612  
ENSG00000171617  
ENSG00000171621  
ENSG00000171631  
ENSG00000171634  
ENSG00000171643  
ENSG00000171649  
ENSG00000171657  
ENSG00000171680  
ENSG00000171681  
ENSG00000171700  
ENSG00000171703  
ENSG00000171711  
ENSG00000171714  
ENSG00000171720  
ENSG00000171722  
ENSG00000171724  
ENSG00000171729  
ENSG00000171735  
ENSG00000171766  
ENSG00000171772  
ENSG00000171773  
ENSG00000171777  
ENSG00000171786  
ENSG00000171790  
ENSG00000171791  
ENSG00000171792  
ENSG00000171798  
ENSG00000171812  
ENSG00000171817  
ENSG00000171823  
ENSG00000171827  
ENSG00000171840  
ENSG00000171843  
ENSG00000171847  
ENSG00000171848  
ENSG00000171855

ENSG00000171861  
ENSG00000171862  
ENSG00000171864  
ENSG00000171867  
ENSG00000171872  
ENSG00000171873  
ENSG00000171877  
ENSG00000171885  
ENSG00000171903  
ENSG00000171914  
ENSG00000171916  
ENSG00000171928  
ENSG00000171940  
ENSG00000171943  
ENSG00000171953  
ENSG00000171960  
ENSG00000171962  
ENSG00000171984  
ENSG00000171988  
ENSG00000171989  
ENSG00000171992  
ENSG00000172005  
ENSG00000172006  
ENSG00000172007  
ENSG00000172014  
ENSG00000172016  
ENSG00000172046  
ENSG00000172053  
ENSG00000172057  
ENSG00000172058  
ENSG00000172059  
ENSG00000172061  
ENSG00000172062  
ENSG00000172071  
ENSG00000172081  
ENSG00000172086  
ENSG00000172113  
ENSG00000172115

ENSG00000172116  
ENSG00000172123  
ENSG00000172137  
ENSG00000172139  
ENSG00000172156  
ENSG00000172159  
ENSG00000172164  
ENSG00000172175  
ENSG00000172183  
ENSG00000172197  
ENSG00000172201  
ENSG00000172215  
ENSG00000172232  
ENSG00000172239  
ENSG00000172243  
ENSG00000172260  
ENSG00000172262  
ENSG00000172264  
ENSG00000172269  
ENSG00000172270  
ENSG00000172273  
ENSG00000172292  
ENSG00000172296  
ENSG00000172301  
ENSG00000172315  
ENSG00000172318  
ENSG00000172322  
ENSG00000172336  
ENSG00000172339  
ENSG00000172340  
ENSG00000172345  
ENSG00000172346  
ENSG00000172348  
ENSG00000172349  
ENSG00000172350  
ENSG00000172354  
ENSG00000172361  
ENSG00000172365



ENSG00000172366  
ENSG00000172367  
ENSG00000172375  
ENSG00000172379  
ENSG00000172380  
ENSG00000172382  
ENSG00000172399  
ENSG00000172403  
ENSG00000172404  
ENSG00000172409  
ENSG00000172432  
ENSG00000172458  
ENSG00000172461  
ENSG00000172466  
ENSG00000172468  
ENSG00000172469  
ENSG00000172478  
ENSG00000172482  
ENSG00000172493  
ENSG00000172508  
ENSG00000172530  
ENSG00000172531  
ENSG00000172534  
ENSG00000172548  
ENSG00000172568  
ENSG00000172572  
ENSG00000172575  
ENSG00000172578  
ENSG00000172590  
ENSG00000172602  
ENSG00000172613  
ENSG00000172638  
ENSG00000172663  
ENSG00000172667  
ENSG00000172671  
ENSG00000172673  
ENSG00000172689  
ENSG00000172716

ENSG00000172724  
ENSG00000172725  
ENSG00000172728  
ENSG00000172731  
ENSG00000172752  
ENSG00000172757  
ENSG00000172765  
ENSG00000172766  
ENSG00000172775  
ENSG00000172780  
ENSG00000172782  
ENSG00000172785  
ENSG00000172794  
ENSG00000172795  
ENSG00000172817  
ENSG00000172818  
ENSG00000172819  
ENSG00000172828  
ENSG00000172830  
ENSG00000172831  
ENSG00000172840  
ENSG00000172845  
ENSG00000172867  
ENSG00000172869  
ENSG00000172878  
ENSG00000172888  
ENSG00000172889  
ENSG00000172890  
ENSG00000172893  
ENSG00000172901  
ENSG00000172915  
ENSG00000172922  
ENSG00000172927  
ENSG00000172932  
ENSG00000172935  
ENSG00000172936  
ENSG00000172939  
ENSG00000172940

ENSG00000172943  
ENSG00000172954  
ENSG00000172955  
ENSG00000172967  
ENSG00000172969  
ENSG00000172977  
ENSG00000172985  
ENSG00000172987  
ENSG00000172992  
ENSG00000172995  
ENSG00000173011  
ENSG00000173020  
ENSG00000173039  
ENSG00000173064  
ENSG00000173065  
ENSG00000173068  
ENSG00000173077  
ENSG00000173083  
ENSG00000173110  
ENSG00000173113  
ENSG00000173120  
ENSG00000173145  
ENSG00000173153  
ENSG00000173156  
ENSG00000173166  
ENSG00000173175  
ENSG00000173193  
ENSG00000173200  
ENSG00000173208  
ENSG00000173210  
ENSG00000173212  
ENSG00000173218  
ENSG00000173221  
ENSG00000173226  
ENSG00000173227  
ENSG00000173230  
ENSG00000173237  
ENSG00000173253

ENSG00000173258  
ENSG00000173262  
ENSG00000173264  
ENSG00000173267  
ENSG00000173269  
ENSG00000173273  
ENSG00000173275  
ENSG00000173276  
ENSG00000173281  
ENSG00000173320  
ENSG00000173327  
ENSG00000173334  
ENSG00000173335  
ENSG00000173338  
ENSG00000173349  
ENSG00000173372  
ENSG00000173391  
ENSG00000173402  
ENSG00000173404  
ENSG00000173406  
ENSG00000173418  
ENSG00000173421  
ENSG00000173432  
ENSG00000173436  
ENSG00000173451  
ENSG00000173452  
ENSG00000173456  
ENSG00000173457  
ENSG00000173464  
ENSG00000173467  
ENSG00000173473  
ENSG00000173480  
ENSG00000173482  
ENSG00000173511  
ENSG00000173517  
ENSG00000173530  
ENSG00000173535  
ENSG00000173540

ENSG00000173542  
ENSG00000173546  
ENSG00000173548  
ENSG00000173567  
ENSG00000173572  
ENSG00000173575  
ENSG00000173585  
ENSG00000173598  
ENSG00000173610  
ENSG00000173611  
ENSG00000173614  
ENSG00000173621  
ENSG00000173626  
ENSG00000173627  
ENSG00000173638  
ENSG00000173641  
ENSG00000173653  
ENSG00000173674  
ENSG00000173678  
ENSG00000173681  
ENSG00000173692  
ENSG00000173698  
ENSG00000173699  
ENSG00000173702  
ENSG00000173705  
ENSG00000173706  
ENSG00000173714  
ENSG00000173726  
ENSG00000173744  
ENSG00000173757  
ENSG00000173762  
ENSG00000173786  
ENSG00000173801  
ENSG00000173805  
ENSG00000173809  
ENSG00000173812  
ENSG00000173818  
ENSG00000173821

ENSG00000173825  
ENSG00000173826  
ENSG00000173838  
ENSG00000173846  
ENSG00000173848  
ENSG00000173852  
ENSG00000173868  
ENSG00000173889  
ENSG00000173890  
ENSG00000173894  
ENSG00000173898  
ENSG00000173905  
ENSG00000173915  
ENSG00000173917  
ENSG00000173918  
ENSG00000173926  
ENSG00000173928  
ENSG00000173930  
ENSG00000173933  
ENSG00000173947  
ENSG00000173950  
ENSG00000173960  
ENSG00000173976  
ENSG00000173991  
ENSG00000173992  
ENSG00000174007  
ENSG00000174010  
ENSG00000174013  
ENSG00000174016  
ENSG00000174032  
ENSG00000174038  
ENSG00000174059  
ENSG00000174080  
ENSG00000174099  
ENSG00000174106  
ENSG00000174109  
ENSG00000174123  
ENSG00000174130

ENSG00000174132  
ENSG00000174136  
ENSG00000174137  
ENSG00000174145  
ENSG00000174151  
ENSG00000174156  
ENSG00000174165  
ENSG00000174173  
ENSG00000174175  
ENSG00000174197  
ENSG00000174206  
ENSG00000174226  
ENSG00000174227  
ENSG00000174233  
ENSG00000174236  
ENSG00000174238  
ENSG00000174243  
ENSG00000174255  
ENSG00000174282  
ENSG00000174292  
ENSG00000174306  
ENSG00000174307  
ENSG00000174325  
ENSG00000174348  
ENSG00000174358  
ENSG00000174370  
ENSG00000174371  
ENSG00000174373  
ENSG00000174429  
ENSG00000174437  
ENSG00000174442  
ENSG00000174450  
ENSG00000174456  
ENSG00000174469  
ENSG00000174473  
ENSG00000174483  
ENSG00000174485  
ENSG00000174498

ENSG00000174500  
ENSG00000174501  
ENSG00000174502  
ENSG00000174514  
ENSG00000174516  
ENSG00000174527  
ENSG00000174529  
ENSG00000174547  
ENSG00000174562  
ENSG00000174567  
ENSG00000174574  
ENSG00000174576  
ENSG00000174579  
ENSG00000174586  
ENSG00000174599  
ENSG00000174600  
ENSG00000174606  
ENSG00000174607  
ENSG00000174611  
ENSG00000174628  
ENSG00000174640  
ENSG00000174652  
ENSG00000174667  
ENSG00000174669  
ENSG00000174672  
ENSG00000174684  
ENSG00000174695  
ENSG00000174697  
ENSG00000174705  
ENSG00000174721  
ENSG00000174738  
ENSG00000174744  
ENSG00000174748  
ENSG00000174749  
ENSG00000174775  
ENSG00000174780  
ENSG00000174792  
ENSG00000174796



ENSG00000174799  
ENSG00000174804  
ENSG00000174807  
ENSG00000174808  
ENSG00000174827  
ENSG00000174837  
ENSG00000174839  
ENSG00000174840  
ENSG00000174844  
ENSG00000174886  
ENSG00000174899  
ENSG00000174903  
ENSG00000174915  
ENSG00000174928  
ENSG00000174938  
ENSG00000174939  
ENSG00000174944  
ENSG00000174945  
ENSG00000174946  
ENSG00000174950  
ENSG00000174951  
ENSG00000174953  
ENSG00000174963  
ENSG00000174989  
ENSG00000174990  
ENSG00000174996  
ENSG00000175018  
ENSG00000175029  
ENSG00000175040  
ENSG00000175048  
ENSG00000175066  
ENSG00000175073  
ENSG00000175077  
ENSG00000175084  
ENSG00000175087  
ENSG00000175093  
ENSG00000175104  
ENSG00000175106

ENSG00000175115  
ENSG00000175121  
ENSG00000175130  
ENSG00000175137  
ENSG00000175155  
ENSG00000175161  
ENSG00000175166  
ENSG00000175175  
ENSG00000175182  
ENSG00000175189  
ENSG00000175193  
ENSG00000175197  
ENSG00000175198  
ENSG00000175203  
ENSG00000175206  
ENSG00000175215  
ENSG00000175216  
ENSG00000175220  
ENSG00000175221  
ENSG00000175224  
ENSG00000175229  
ENSG00000175262  
ENSG00000175264  
ENSG00000175265  
ENSG00000175267  
ENSG00000175274  
ENSG00000175279  
ENSG00000175287  
ENSG00000175294  
ENSG00000175305  
ENSG00000175311  
ENSG00000175318  
ENSG00000175322  
ENSG00000175324  
ENSG00000175329  
ENSG00000175334  
ENSG00000175336  
ENSG00000175344

ENSG00000175348  
ENSG00000175352  
ENSG00000175354  
ENSG00000175356  
ENSG00000175376  
ENSG00000175387  
ENSG00000175395  
ENSG00000175414  
ENSG00000175416  
ENSG00000175426  
ENSG00000175445  
ENSG00000175449  
ENSG00000175455  
ENSG00000175463  
ENSG00000175467  
ENSG00000175470  
ENSG00000175471  
ENSG00000175482  
ENSG00000175489  
ENSG00000175497  
ENSG00000175505  
ENSG00000175518  
ENSG00000175536  
ENSG00000175538  
ENSG00000175544  
ENSG00000175548  
ENSG00000175550  
ENSG00000175556  
ENSG00000175564  
ENSG00000175573  
ENSG00000175575  
ENSG00000175581  
ENSG00000175582  
ENSG00000175591  
ENSG00000175592  
ENSG00000175595  
ENSG00000175600  
ENSG00000175606

ENSG00000175634  
ENSG00000175643  
ENSG00000175662  
ENSG00000175697  
ENSG00000175707  
ENSG00000175711  
ENSG00000175727  
ENSG00000175745  
ENSG00000175764  
ENSG00000175766  
ENSG00000175779  
ENSG00000175782  
ENSG00000175785  
ENSG00000175787  
ENSG00000175793  
ENSG00000175806  
ENSG00000175809  
ENSG00000175820  
ENSG00000175826  
ENSG00000175832  
ENSG00000175854  
ENSG00000175857  
ENSG00000175866  
ENSG00000175868  
ENSG00000175874  
ENSG00000175879  
ENSG00000175893  
ENSG00000175894  
ENSG00000175895  
ENSG00000175906  
ENSG00000175928  
ENSG00000175931  
ENSG00000175938  
ENSG00000175970  
ENSG00000175984  
ENSG00000176014  
ENSG00000176018  
ENSG00000176020

ENSG00000176022  
ENSG00000176029  
ENSG00000176046  
ENSG00000176049  
ENSG00000176055  
ENSG00000176058  
ENSG00000176076  
ENSG00000176087  
ENSG00000176095  
ENSG00000176101  
ENSG00000176105  
ENSG00000176108  
ENSG00000176125  
ENSG00000176136  
ENSG00000176142  
ENSG00000176148  
ENSG00000176153  
ENSG00000176155  
ENSG00000176160  
ENSG00000176165  
ENSG00000176170  
ENSG00000176177  
ENSG00000176182  
ENSG00000176204  
ENSG00000176209  
ENSG00000176244  
ENSG00000176261  
ENSG00000176273  
ENSG00000176293  
ENSG00000176358  
ENSG00000176371  
ENSG00000176381  
ENSG00000176383  
ENSG00000176386  
ENSG00000176387  
ENSG00000176390  
ENSG00000176396  
ENSG00000176401

ENSG00000176402  
ENSG00000176406  
ENSG00000176407  
ENSG00000176410  
ENSG00000176422  
ENSG00000176428  
ENSG00000176435  
ENSG00000176438  
ENSG00000176444  
ENSG00000176454  
ENSG00000176463  
ENSG00000176472  
ENSG00000176473  
ENSG00000176485  
ENSG00000176490  
ENSG00000176532  
ENSG00000176533  
ENSG00000176542  
ENSG00000176563  
ENSG00000176566  
ENSG00000176595  
ENSG00000176597  
ENSG00000176601  
ENSG00000176619  
ENSG00000176623  
ENSG00000176624  
ENSG00000176635  
ENSG00000176641  
ENSG00000176658  
ENSG00000176678  
ENSG00000176681  
ENSG00000176697  
ENSG00000176714  
ENSG00000176715  
ENSG00000176720  
ENSG00000176731  
ENSG00000176732  
ENSG00000176749

ENSG00000176771  
ENSG00000176774  
ENSG00000176782  
ENSG00000176783  
ENSG00000176788  
ENSG00000176834  
ENSG00000176842  
ENSG00000176853  
ENSG00000176871  
ENSG00000176884  
ENSG00000176887  
ENSG00000176890  
ENSG00000176896  
ENSG00000176907  
ENSG00000176909  
ENSG00000176915  
ENSG00000176920  
ENSG00000176927  
ENSG00000176928  
ENSG00000176945  
ENSG00000176953  
ENSG00000176956  
ENSG00000176971  
ENSG00000176973  
ENSG00000176974  
ENSG00000176986  
ENSG00000176994  
ENSG00000177000  
ENSG00000177023  
ENSG00000177030  
ENSG00000177034  
ENSG00000177042  
ENSG00000177051  
ENSG00000177058  
ENSG00000177076  
ENSG00000177082  
ENSG00000177084  
ENSG00000177096

ENSG00000177098  
ENSG00000177105  
ENSG00000177106  
ENSG00000177108  
ENSG00000177119  
ENSG00000177125  
ENSG00000177138  
ENSG00000177143  
ENSG00000177150  
ENSG00000177169  
ENSG00000177181  
ENSG00000177182  
ENSG00000177189  
ENSG00000177200  
ENSG00000177202  
ENSG00000177225  
ENSG00000177238  
ENSG00000177239  
ENSG00000177257  
ENSG00000177272  
ENSG00000177283  
ENSG00000177291  
ENSG00000177294  
ENSG00000177300  
ENSG00000177301  
ENSG00000177302  
ENSG00000177303  
ENSG00000177324  
ENSG00000177352  
ENSG00000177354  
ENSG00000177363  
ENSG00000177370  
ENSG00000177380  
ENSG00000177383  
ENSG00000177398  
ENSG00000177409  
ENSG00000177414  
ENSG00000177427



ENSG00000177455  
ENSG00000177463  
ENSG00000177464  
ENSG00000177468  
ENSG00000177469  
ENSG00000177479  
ENSG00000177483  
ENSG00000177485  
ENSG00000177494  
ENSG00000177511  
ENSG00000177519  
ENSG00000177542  
ENSG00000177551  
ENSG00000177565  
ENSG00000177570  
ENSG00000177576  
ENSG00000177599  
ENSG00000177602  
ENSG00000177606  
ENSG00000177613  
ENSG00000177614  
ENSG00000177627  
ENSG00000177628  
ENSG00000177646  
ENSG00000177663  
ENSG00000177669  
ENSG00000177674  
ENSG00000177679  
ENSG00000177683  
ENSG00000177685  
ENSG00000177688  
ENSG00000177689  
ENSG00000177694  
ENSG00000177697  
ENSG00000177700  
ENSG00000177706  
ENSG00000177707  
ENSG00000177721

ENSG00000177728  
ENSG00000177731  
ENSG00000177732  
ENSG00000177733  
ENSG00000177807  
ENSG00000177830  
ENSG00000177839  
ENSG00000177842  
ENSG00000177853  
ENSG00000177854  
ENSG00000177868  
ENSG00000177875  
ENSG00000177879  
ENSG00000177885  
ENSG00000177888  
ENSG00000177889  
ENSG00000177917  
ENSG00000177932  
ENSG00000177946  
ENSG00000177951  
ENSG00000177963  
ENSG00000177971  
ENSG00000177981  
ENSG00000177984  
ENSG00000177990  
ENSG00000177994  
ENSG00000178021  
ENSG00000178026  
ENSG00000178031  
ENSG00000178033  
ENSG00000178038  
ENSG00000178053  
ENSG00000178057  
ENSG00000178074  
ENSG00000178075  
ENSG00000178093  
ENSG00000178096  
ENSG00000178104

ENSG00000178105  
ENSG00000178149  
ENSG00000178150  
ENSG00000178163  
ENSG00000178171  
ENSG00000178172  
ENSG00000178175  
ENSG00000178177  
ENSG00000178184  
ENSG00000178187  
ENSG00000178188  
ENSG00000178199  
ENSG00000178202  
ENSG00000178209  
ENSG00000178217  
ENSG00000178222  
ENSG00000178233  
ENSG00000178234  
ENSG00000178235  
ENSG00000178279  
ENSG00000178295  
ENSG00000178301  
ENSG00000178307  
ENSG00000178338  
ENSG00000178343  
ENSG00000178363  
ENSG00000178372  
ENSG00000178381  
ENSG00000178385  
ENSG00000178397  
ENSG00000178401  
ENSG00000178403  
ENSG00000178409  
ENSG00000178425  
ENSG00000178445  
ENSG00000178449  
ENSG00000178460  
ENSG00000178462

ENSG00000178502  
ENSG00000178522  
ENSG00000178531  
ENSG00000178537  
ENSG00000178538  
ENSG00000178562  
ENSG00000178567  
ENSG00000178568  
ENSG00000178573  
ENSG00000178585  
ENSG00000178597  
ENSG00000178607  
ENSG00000178662  
ENSG00000178665  
ENSG00000178690  
ENSG00000178691  
ENSG00000178695  
ENSG00000178700  
ENSG00000178718  
ENSG00000178719  
ENSG00000178726  
ENSG00000178732  
ENSG00000178734  
ENSG00000178752  
ENSG00000178761  
ENSG00000178764  
ENSG00000178772  
ENSG00000178773  
ENSG00000178789  
ENSG00000178796  
ENSG00000178802  
ENSG00000178821  
ENSG00000178826  
ENSG00000178828  
ENSG00000178852  
ENSG00000178860  
ENSG00000178878  
ENSG00000178882

ENSG00000178904  
ENSG00000178919  
ENSG00000178921  
ENSG00000178927  
ENSG00000178928  
ENSG00000178934  
ENSG00000178935  
ENSG00000178951  
ENSG00000178952  
ENSG00000178965  
ENSG00000178966  
ENSG00000178971  
ENSG00000178974  
ENSG00000178980  
ENSG00000178988  
ENSG00000178996  
ENSG00000179010  
ENSG00000179021  
ENSG00000179023  
ENSG00000179029  
ENSG00000179041  
ENSG00000179051  
ENSG00000179057  
ENSG00000179059  
ENSG00000179083  
ENSG00000179091  
ENSG00000179094  
ENSG00000179097  
ENSG00000179104  
ENSG00000179111  
ENSG00000179115  
ENSG00000179119  
ENSG00000179133  
ENSG00000179134  
ENSG00000179142  
ENSG00000179148  
ENSG00000179151  
ENSG00000179152

ENSG00000179163  
ENSG00000179165  
ENSG00000179178  
ENSG00000179195  
ENSG00000179213  
ENSG00000179240  
ENSG00000179241  
ENSG00000179242  
ENSG00000179256  
ENSG00000179262  
ENSG00000179270  
ENSG00000179284  
ENSG00000179292  
ENSG00000179295  
ENSG00000179299  
ENSG00000179300  
ENSG00000179304  
ENSG00000179314  
ENSG00000179335  
ENSG00000179344  
ENSG00000179348  
ENSG00000179361  
ENSG00000179364  
ENSG00000179387  
ENSG00000179388  
ENSG00000179399  
ENSG00000179403  
ENSG00000179409  
ENSG00000179431  
ENSG00000179454  
ENSG00000179455  
ENSG00000179456  
ENSG00000179476  
ENSG00000179520  
ENSG00000179526  
ENSG00000179528  
ENSG00000179532  
ENSG00000179542

ENSG00000179546  
ENSG00000179562  
ENSG00000179564  
ENSG00000179593  
ENSG00000179598  
ENSG00000179603  
ENSG00000179604  
ENSG00000179627  
ENSG00000179630  
ENSG00000179632  
ENSG00000179709  
ENSG00000179761  
ENSG00000179772  
ENSG00000179776  
ENSG00000179813  
ENSG00000179820  
ENSG00000179826  
ENSG00000179832  
ENSG00000179833  
ENSG00000179841  
ENSG00000179855  
ENSG00000179889  
ENSG00000179909  
ENSG00000179912  
ENSG00000179913  
ENSG00000179915  
ENSG00000179922  
ENSG00000179930  
ENSG00000179933  
ENSG00000179938  
ENSG00000179941  
ENSG00000179943  
ENSG00000179950  
ENSG00000179958  
ENSG00000179981  
ENSG00000180008  
ENSG00000180011  
ENSG00000180035

ENSG00000180043  
ENSG00000180044  
ENSG00000180071  
ENSG00000180089  
ENSG00000180090  
ENSG00000180113  
ENSG00000180116  
ENSG00000180138  
ENSG00000180155  
ENSG00000180182  
ENSG00000180185  
ENSG00000180190  
ENSG00000180198  
ENSG00000180205  
ENSG00000180219  
ENSG00000180228  
ENSG00000180233  
ENSG00000180251  
ENSG00000180263  
ENSG00000180264  
ENSG00000180269  
ENSG00000180287  
ENSG00000180304  
ENSG00000180316  
ENSG00000180329  
ENSG00000180332  
ENSG00000180336  
ENSG00000180340  
ENSG00000180347  
ENSG00000180353  
ENSG00000180354  
ENSG00000180357  
ENSG00000180370  
ENSG00000180398  
ENSG00000180423  
ENSG00000180424  
ENSG00000180425  
ENSG00000180432



ENSG00000180440  
ENSG00000180447  
ENSG00000180448  
ENSG00000180481  
ENSG00000180488  
ENSG00000180509  
ENSG00000180530  
ENSG00000180537  
ENSG00000180543  
ENSG00000180549  
ENSG00000180592  
ENSG00000180611  
ENSG00000180616  
ENSG00000180626  
ENSG00000180628  
ENSG00000180644  
ENSG00000180658  
ENSG00000180660  
ENSG00000180667  
ENSG00000180694  
ENSG00000180697  
ENSG00000180720  
ENSG00000180730  
ENSG00000180739  
ENSG00000180772  
ENSG00000180773  
ENSG00000180776  
ENSG00000180785  
ENSG00000180787  
ENSG00000180801  
ENSG00000180806  
ENSG00000180817  
ENSG00000180818  
ENSG00000180822  
ENSG00000180828  
ENSG00000180834  
ENSG00000180855  
ENSG00000180871

ENSG00000180875  
ENSG00000180881  
ENSG00000180884  
ENSG00000180891  
ENSG00000180901  
ENSG00000180902  
ENSG00000180914  
ENSG00000180917  
ENSG00000180921  
ENSG00000180929  
ENSG00000180938  
ENSG00000180957  
ENSG00000180979  
ENSG00000180998  
ENSG00000180999  
ENSG00000181004  
ENSG00000181007  
ENSG00000181013  
ENSG00000181016  
ENSG00000181019  
ENSG00000181026  
ENSG00000181027  
ENSG00000181029  
ENSG00000181031  
ENSG00000181035  
ENSG00000181036  
ENSG00000181038  
ENSG00000181045  
ENSG00000181061  
ENSG00000181072  
ENSG00000181092  
ENSG00000181104  
ENSG00000181163  
ENSG00000181192  
ENSG00000181195  
ENSG00000181215  
ENSG00000181220  
ENSG00000181234

ENSG00000181240  
ENSG00000181264  
ENSG00000181274  
ENSG00000181284  
ENSG00000181291  
ENSG00000181315  
ENSG00000181322  
ENSG00000181333  
ENSG00000181350  
ENSG00000181374  
ENSG00000181378  
ENSG00000181381  
ENSG00000181396  
ENSG00000181404  
ENSG00000181418  
ENSG00000181433  
ENSG00000181449  
ENSG00000181458  
ENSG00000181467  
ENSG00000181472  
ENSG00000181481  
ENSG00000181513  
ENSG00000181523  
ENSG00000181541  
ENSG00000181544  
ENSG00000181555  
ENSG00000181562  
ENSG00000181577  
ENSG00000181585  
ENSG00000181588  
ENSG00000181610  
ENSG00000181619  
ENSG00000181626  
ENSG00000181631  
ENSG00000181634  
ENSG00000181638  
ENSG00000181649  
ENSG00000181652

ENSG00000181656  
ENSG00000181666  
ENSG00000181690  
ENSG00000181704  
ENSG00000181722  
ENSG00000181744  
ENSG00000181751  
ENSG00000181754  
ENSG00000181773  
ENSG00000181778  
ENSG00000181788  
ENSG00000181789  
ENSG00000181790  
ENSG00000181804  
ENSG00000181826  
ENSG00000181827  
ENSG00000181830  
ENSG00000181847  
ENSG00000181852  
ENSG00000181856  
ENSG00000181873  
ENSG00000181885  
ENSG00000181894  
ENSG00000181896  
ENSG00000181904  
ENSG00000181915  
ENSG00000181924  
ENSG00000181929  
ENSG00000181938  
ENSG00000181965  
ENSG00000181982  
ENSG00000181991  
ENSG00000182004  
ENSG00000182010  
ENSG00000182013  
ENSG00000182022  
ENSG00000182035  
ENSG00000182040

ENSG00000182050  
ENSG00000182054  
ENSG00000182087  
ENSG00000182093  
ENSG00000182095  
ENSG00000182103  
ENSG00000182107  
ENSG00000182108  
ENSG00000182111  
ENSG00000182118  
ENSG00000182132  
ENSG00000182134  
ENSG00000182141  
ENSG00000182149  
ENSG00000182150  
ENSG00000182156  
ENSG00000182158  
ENSG00000182162  
ENSG00000182168  
ENSG00000182173  
ENSG00000182175  
ENSG00000182180  
ENSG00000182185  
ENSG00000182195  
ENSG00000182196  
ENSG00000182197  
ENSG00000182199  
ENSG00000182208  
ENSG00000182218  
ENSG00000182223  
ENSG00000182224  
ENSG00000182230  
ENSG00000182240  
ENSG00000182253  
ENSG00000182256  
ENSG00000182257  
ENSG00000182263  
ENSG00000182271

ENSG00000182287  
ENSG00000182307  
ENSG00000182308  
ENSG00000182318  
ENSG00000182324  
ENSG00000182326  
ENSG00000182330  
ENSG00000182333  
ENSG00000182346  
ENSG00000182359  
ENSG00000182372  
ENSG00000182378  
ENSG00000182379  
ENSG00000182389  
ENSG00000182400  
ENSG00000182405  
ENSG00000182446  
ENSG00000182450  
ENSG00000182459  
ENSG00000182463  
ENSG00000182472  
ENSG00000182473  
ENSG00000182489  
ENSG00000182492  
ENSG00000182504  
ENSG00000182508  
ENSG00000182512  
ENSG00000182518  
ENSG00000182533  
ENSG00000182534  
ENSG00000182541  
ENSG00000182544  
ENSG00000182551  
ENSG00000182552  
ENSG00000182557  
ENSG00000182566  
ENSG00000182568  
ENSG00000182575

ENSG00000182578  
ENSG00000182580  
ENSG00000182584  
ENSG00000182585  
ENSG00000182591  
ENSG00000182601  
ENSG00000182606  
ENSG00000182621  
ENSG00000182628  
ENSG00000182631  
ENSG00000182636  
ENSG00000182667  
ENSG00000182670  
ENSG00000182676  
ENSG00000182687  
ENSG00000182704  
ENSG00000182718  
ENSG00000182732  
ENSG00000182742  
ENSG00000182747  
ENSG00000182749  
ENSG00000182752  
ENSG00000182759  
ENSG00000182771  
ENSG00000182782  
ENSG00000182795  
ENSG00000182798  
ENSG00000182809  
ENSG00000182827  
ENSG00000182831  
ENSG00000182836  
ENSG00000182853  
ENSG00000182858  
ENSG00000182870  
ENSG00000182871  
ENSG00000182872  
ENSG00000182885  
ENSG00000182890

ENSG00000182896  
ENSG00000182901  
ENSG00000182902  
ENSG00000182903  
ENSG00000182916  
ENSG00000182919  
ENSG00000182923  
ENSG00000182931  
ENSG00000182934  
ENSG00000182938  
ENSG00000182952  
ENSG00000182957  
ENSG00000182963  
ENSG00000182968  
ENSG00000182983  
ENSG00000182985  
ENSG00000183010  
ENSG00000183011  
ENSG00000183018  
ENSG00000183020  
ENSG00000183023  
ENSG00000183032  
ENSG00000183034  
ENSG00000183036  
ENSG00000183044  
ENSG00000183048  
ENSG00000183049  
ENSG00000183054  
ENSG00000183060  
ENSG00000183066  
ENSG00000183072  
ENSG00000183077  
ENSG00000183087  
ENSG00000183092  
ENSG00000183098  
ENSG00000183111  
ENSG00000183114  
ENSG00000183117



ENSG00000183128  
ENSG00000183134  
ENSG00000183137  
ENSG00000183145  
ENSG00000183146  
ENSG00000183148  
ENSG00000183153  
ENSG00000183155  
ENSG00000183160  
ENSG00000183161  
ENSG00000183166  
ENSG00000183172  
ENSG00000183186  
ENSG00000183196  
ENSG00000183207  
ENSG00000183230  
ENSG00000183246  
ENSG00000183255  
ENSG00000183273  
ENSG00000183281  
ENSG00000183283  
ENSG00000183287  
ENSG00000183305  
ENSG00000183307  
ENSG00000183309  
ENSG00000183313  
ENSG00000183317  
ENSG00000183323  
ENSG00000183337  
ENSG00000183340  
ENSG00000183347  
ENSG00000183354  
ENSG00000183379  
ENSG00000183401  
ENSG00000183421  
ENSG00000183423  
ENSG00000183431  
ENSG00000183434

ENSG00000183454  
ENSG00000183475  
ENSG00000183476  
ENSG00000183484  
ENSG00000183486  
ENSG00000183495  
ENSG00000183496  
ENSG00000183508  
ENSG00000183513  
ENSG00000183520  
ENSG00000183527  
ENSG00000183530  
ENSG00000183549  
ENSG00000183569  
ENSG00000183570  
ENSG00000183571  
ENSG00000183576  
ENSG00000183578  
ENSG00000183579  
ENSG00000183580  
ENSG00000183597  
ENSG00000183605  
ENSG00000183615  
ENSG00000183624  
ENSG00000183625  
ENSG00000183628  
ENSG00000183632  
ENSG00000183640  
ENSG00000183647  
ENSG00000183655  
ENSG00000183662  
ENSG00000183665  
ENSG00000183668  
ENSG00000183671  
ENSG00000183682  
ENSG00000183684  
ENSG00000183688  
ENSG00000183690

ENSG00000183695  
ENSG00000183706  
ENSG00000183715  
ENSG00000183718  
ENSG00000183722  
ENSG00000183723  
ENSG00000183726  
ENSG00000183734  
ENSG00000183735  
ENSG00000183741  
ENSG00000183742  
ENSG00000183747  
ENSG00000183760  
ENSG00000183762  
ENSG00000183763  
ENSG00000183765  
ENSG00000183770  
ENSG00000183773  
ENSG00000183775  
ENSG00000183778  
ENSG00000183779  
ENSG00000183780  
ENSG00000183784  
ENSG00000183785  
ENSG00000183798  
ENSG00000183801  
ENSG00000183808  
ENSG00000183814  
ENSG00000183826  
ENSG00000183831  
ENSG00000183833  
ENSG00000183837  
ENSG00000183840  
ENSG00000183844  
ENSG00000183853  
ENSG00000183856  
ENSG00000183862  
ENSG00000183864

ENSG00000183873  
ENSG00000183876  
ENSG00000183878  
ENSG00000183908  
ENSG00000183918  
ENSG00000183943  
ENSG00000183955  
ENSG00000183960  
ENSG00000183963  
ENSG00000183978  
ENSG00000184005  
ENSG00000184007  
ENSG00000184009  
ENSG00000184012  
ENSG00000184014  
ENSG00000184047  
ENSG00000184056  
ENSG00000184058  
ENSG00000184060  
ENSG00000184076  
ENSG00000184083  
ENSG00000184113  
ENSG00000184117  
ENSG00000184144  
ENSG00000184148  
ENSG00000184154  
ENSG00000184156  
ENSG00000184164  
ENSG00000184178  
ENSG00000184182  
ENSG00000184185  
ENSG00000184194  
ENSG00000184203  
ENSG00000184205  
ENSG00000184206  
ENSG00000184207  
ENSG00000184208  
ENSG00000184210

ENSG00000184216  
ENSG00000184221  
ENSG00000184226  
ENSG00000184232  
ENSG00000184254  
ENSG00000184271  
ENSG00000184277  
ENSG00000184281  
ENSG00000184292  
ENSG00000184293  
ENSG00000184305  
ENSG00000184307  
ENSG00000184330  
ENSG00000184343  
ENSG00000184347  
ENSG00000184349  
ENSG00000184363  
ENSG00000184368  
ENSG00000184371  
ENSG00000184374  
ENSG00000184378  
ENSG00000184384  
ENSG00000184388  
ENSG00000184402  
ENSG00000184408  
ENSG00000184432  
ENSG00000184434  
ENSG00000184451  
ENSG00000184454  
ENSG00000184459  
ENSG00000184465  
ENSG00000184470  
ENSG00000184471  
ENSG00000184481  
ENSG00000184486  
ENSG00000184489  
ENSG00000184500  
ENSG00000184507

ENSG00000184508  
ENSG00000184517  
ENSG00000184524  
ENSG00000184545  
ENSG00000184557  
ENSG00000184564  
ENSG00000184571  
ENSG00000184574  
ENSG00000184584  
ENSG00000184588  
ENSG00000184601  
ENSG00000184602  
ENSG00000184613  
ENSG00000184635  
ENSG00000184640  
ENSG00000184650  
ENSG00000184675  
ENSG00000184677  
ENSG00000184678  
ENSG00000184697  
ENSG00000184702  
ENSG00000184708  
ENSG00000184716  
ENSG00000184719  
ENSG00000184731  
ENSG00000184743  
ENSG00000184785  
ENSG00000184787  
ENSG00000184788  
ENSG00000184792  
ENSG00000184811  
ENSG00000184828  
ENSG00000184840  
ENSG00000184845  
ENSG00000184857  
ENSG00000184860  
ENSG00000184863  
ENSG00000184887

ENSG00000184898  
ENSG00000184900  
ENSG00000184911  
ENSG00000184916  
ENSG00000184923  
ENSG00000184924  
ENSG00000184937  
ENSG00000184939  
ENSG00000184949  
ENSG00000184956  
ENSG00000184979  
ENSG00000184983  
ENSG00000184984  
ENSG00000184985  
ENSG00000184986  
ENSG00000184988  
ENSG00000184990  
ENSG00000185000  
ENSG00000185002  
ENSG00000185008  
ENSG00000185009  
ENSG00000185010  
ENSG00000185013  
ENSG00000185015  
ENSG00000185019  
ENSG00000185022  
ENSG00000185024  
ENSG00000185033  
ENSG00000185040  
ENSG00000185046  
ENSG00000185049  
ENSG00000185052  
ENSG00000185053  
ENSG00000185056  
ENSG00000185069  
ENSG00000185070  
ENSG00000185085  
ENSG00000185087

ENSG00000185088  
ENSG00000185090  
ENSG00000185100  
ENSG00000185101  
ENSG00000185104  
ENSG00000185105  
ENSG00000185112  
ENSG00000185122  
ENSG00000185127  
ENSG00000185129  
ENSG00000185149  
ENSG00000185155  
ENSG00000185163  
ENSG00000185164  
ENSG00000185189  
ENSG00000185201  
ENSG00000185215  
ENSG00000185219  
ENSG00000185222  
ENSG00000185231  
ENSG00000185236  
ENSG00000185238  
ENSG00000185245  
ENSG00000185247  
ENSG00000185250  
ENSG00000185252  
ENSG00000185262  
ENSG00000185267  
ENSG00000185269  
ENSG00000185274  
ENSG00000185278  
ENSG00000185298  
ENSG00000185303  
ENSG00000185305  
ENSG00000185332  
ENSG00000185338  
ENSG00000185339  
ENSG00000185340



ENSG00000185344  
ENSG00000185345  
ENSG00000185347  
ENSG00000185352  
ENSG00000185359  
ENSG00000185361  
ENSG00000185379  
ENSG00000185386  
ENSG00000185420  
ENSG00000185432  
ENSG00000185436  
ENSG00000185437  
ENSG00000185442  
ENSG00000185453  
ENSG00000185475  
ENSG00000185477  
ENSG00000185480  
ENSG00000185483  
ENSG00000185499  
ENSG00000185504  
ENSG00000185515  
ENSG00000185518  
ENSG00000185519  
ENSG00000185527  
ENSG00000185532  
ENSG00000185551  
ENSG00000185559  
ENSG00000185561  
ENSG00000185565  
ENSG00000185585  
ENSG00000185591  
ENSG00000185594  
ENSG00000185610  
ENSG00000185614  
ENSG00000185619  
ENSG00000185621  
ENSG00000185624  
ENSG00000185627

ENSG00000185630  
ENSG00000185633  
ENSG00000185634  
ENSG00000185640  
ENSG00000185650  
ENSG00000185651  
ENSG00000185652  
ENSG00000185658  
ENSG00000185666  
ENSG00000185668  
ENSG00000185669  
ENSG00000185670  
ENSG00000185686  
ENSG00000185689  
ENSG00000185697  
ENSG00000185716  
ENSG00000185722  
ENSG00000185728  
ENSG00000185730  
ENSG00000185736  
ENSG00000185737  
ENSG00000185739  
ENSG00000185742  
ENSG00000185745  
ENSG00000185753  
ENSG00000185760  
ENSG00000185761  
ENSG00000185774  
ENSG00000185787  
ENSG00000185792  
ENSG00000185800  
ENSG00000185811  
ENSG00000185813  
ENSG00000185818  
ENSG00000185823  
ENSG00000185825  
ENSG00000185829  
ENSG00000185860

ENSG00000185869  
ENSG00000185873  
ENSG00000185875  
ENSG00000185883  
ENSG00000185888  
ENSG00000185896  
ENSG00000185897  
ENSG00000185900  
ENSG00000185905  
ENSG00000185909  
ENSG00000185915  
ENSG00000185917  
ENSG00000185920  
ENSG00000185924  
ENSG00000185933  
ENSG00000185946  
ENSG00000185950  
ENSG00000185958  
ENSG00000185960  
ENSG00000185963  
ENSG00000185966  
ENSG00000185973  
ENSG00000185985  
ENSG00000185988  
ENSG00000185989  
ENSG00000186001  
ENSG00000186007  
ENSG00000186009  
ENSG00000186017  
ENSG00000186020  
ENSG00000186038  
ENSG00000186047  
ENSG00000186049  
ENSG00000186063  
ENSG00000186073  
ENSG00000186074  
ENSG00000186075  
ENSG00000186081

ENSG00000186088  
ENSG00000186094  
ENSG00000186103  
ENSG00000186106  
ENSG00000186111  
ENSG00000186115  
ENSG00000186130  
ENSG00000186132  
ENSG00000186141  
ENSG00000186143  
ENSG00000186150  
ENSG00000186153  
ENSG00000186174  
ENSG00000186184  
ENSG00000186185  
ENSG00000186187  
ENSG00000186188  
ENSG00000186193  
ENSG00000186197  
ENSG00000186198  
ENSG00000186205  
ENSG00000186207  
ENSG00000186212  
ENSG00000186230  
ENSG00000186231  
ENSG00000186260  
ENSG00000186265  
ENSG00000186280  
ENSG00000186283  
ENSG00000186288  
ENSG00000186297  
ENSG00000186298  
ENSG00000186300  
ENSG00000186314  
ENSG00000186318  
ENSG00000186326  
ENSG00000186334  
ENSG00000186335

ENSG00000186340  
ENSG00000186350  
ENSG00000186352  
ENSG00000186354  
ENSG00000186376  
ENSG00000186399  
ENSG00000186407  
ENSG00000186409  
ENSG00000186416  
ENSG00000186417  
ENSG00000186431  
ENSG00000186432  
ENSG00000186439  
ENSG00000186442  
ENSG00000186446  
ENSG00000186448  
ENSG00000186451  
ENSG00000186458  
ENSG00000186468  
ENSG00000186469  
ENSG00000186470  
ENSG00000186472  
ENSG00000186474  
ENSG00000186479  
ENSG00000186480  
ENSG00000186493  
ENSG00000186496  
ENSG00000186501  
ENSG00000186509  
ENSG00000186513  
ENSG00000186517  
ENSG00000186522  
ENSG00000186523  
ENSG00000186526  
ENSG00000186529  
ENSG00000186532  
ENSG00000186564  
ENSG00000186566

ENSG00000186567  
ENSG00000186575  
ENSG00000186577  
ENSG00000186579  
ENSG00000186591  
ENSG00000186603  
ENSG00000186625  
ENSG00000186628  
ENSG00000186635  
ENSG00000186638  
ENSG00000186642  
ENSG00000186648  
ENSG00000186652  
ENSG00000186654  
ENSG00000186660  
ENSG00000186665  
ENSG00000186666  
ENSG00000186675  
ENSG00000186684  
ENSG00000186687  
ENSG00000186710  
ENSG00000186716  
ENSG00000186732  
ENSG00000186766  
ENSG00000186767  
ENSG00000186788  
ENSG00000186790  
ENSG00000186792  
ENSG00000186806  
ENSG00000186810  
ENSG00000186812  
ENSG00000186814  
ENSG00000186815  
ENSG00000186818  
ENSG00000186834  
ENSG00000186838  
ENSG00000186854  
ENSG00000186860

ENSG00000186862  
ENSG00000186866  
ENSG00000186867  
ENSG00000186868  
ENSG00000186871  
ENSG00000186889  
ENSG00000186895  
ENSG00000186897  
ENSG00000186907  
ENSG00000186908  
ENSG00000186912  
ENSG00000186918  
ENSG00000186925  
ENSG00000186951  
ENSG00000186952  
ENSG00000186998  
ENSG00000187010  
ENSG00000187024  
ENSG00000187033  
ENSG00000187037  
ENSG00000187045  
ENSG00000187048  
ENSG00000187049  
ENSG00000187051  
ENSG00000187054  
ENSG00000187066  
ENSG00000187068  
ENSG00000187079  
ENSG00000187082  
ENSG00000187094  
ENSG00000187097  
ENSG00000187098  
ENSG00000187105  
ENSG00000187109  
ENSG00000187116  
ENSG00000187122  
ENSG00000187123  
ENSG00000187134

ENSG00000187140  
ENSG00000187144  
ENSG00000187147  
ENSG00000187151  
ENSG00000187164  
ENSG00000187186  
ENSG00000187187  
ENSG00000187189  
ENSG00000187191  
ENSG00000187210  
ENSG00000187231  
ENSG00000187239  
ENSG00000187243  
ENSG00000187244  
ENSG00000187258  
ENSG00000187260  
ENSG00000187266  
ENSG00000187268  
ENSG00000187272  
ENSG00000187288  
ENSG00000187323  
ENSG00000187325  
ENSG00000187398  
ENSG00000187416  
ENSG00000187446  
ENSG00000187474  
ENSG00000187479  
ENSG00000187486  
ENSG00000187498  
ENSG00000187513  
ENSG00000187522  
ENSG00000187531  
ENSG00000187533  
ENSG00000187535  
ENSG00000187546  
ENSG00000187550  
ENSG00000187554  
ENSG00000187555



ENSG00000187566  
ENSG00000187601  
ENSG00000187605  
ENSG00000187607  
ENSG00000187624  
ENSG00000187626  
ENSG00000187627  
ENSG00000187630  
ENSG00000187642  
ENSG00000187650  
ENSG00000187658  
ENSG00000187664  
ENSG00000187672  
ENSG00000187676  
ENSG00000187678  
ENSG00000187690  
ENSG00000187695  
ENSG00000187713  
ENSG00000187714  
ENSG00000187715  
ENSG00000187720  
ENSG00000187736  
ENSG00000187741  
ENSG00000187742  
ENSG00000187753  
ENSG00000187764  
ENSG00000187772  
ENSG00000187773  
ENSG00000187778  
ENSG00000187783  
ENSG00000187791  
ENSG00000187792  
ENSG00000187800  
ENSG00000187801  
ENSG00000187806  
ENSG00000187808  
ENSG00000187823  
ENSG00000187824

ENSG00000187838  
ENSG00000187840  
ENSG00000187848  
ENSG00000187855  
ENSG00000187860  
ENSG00000187866  
ENSG00000187871  
ENSG00000187902  
ENSG00000187905  
ENSG00000187912  
ENSG00000187922  
ENSG00000187942  
ENSG00000187954  
ENSG00000187955  
ENSG00000187957  
ENSG00000187961  
ENSG00000187987  
ENSG00000187994  
ENSG00000188001  
ENSG00000188015  
ENSG00000188021  
ENSG00000188026  
ENSG00000188033  
ENSG00000188039  
ENSG00000188042  
ENSG00000188051  
ENSG00000188056  
ENSG00000188060  
ENSG00000188064  
ENSG00000188070  
ENSG00000188086  
ENSG00000188089  
ENSG00000188092  
ENSG00000188095  
ENSG00000188107  
ENSG00000188112  
ENSG00000188120  
ENSG00000188133

ENSG00000188152  
ENSG00000188153  
ENSG00000188155  
ENSG00000188158  
ENSG00000188167  
ENSG00000188171  
ENSG00000188175  
ENSG00000188176  
ENSG00000188177  
ENSG00000188186  
ENSG00000188191  
ENSG00000188199  
ENSG00000188211  
ENSG00000188215  
ENSG00000188227  
ENSG00000188229  
ENSG00000188243  
ENSG00000188257  
ENSG00000188263  
ENSG00000188266  
ENSG00000188269  
ENSG00000188277  
ENSG00000188283  
ENSG00000188293  
ENSG00000188305  
ENSG00000188312  
ENSG00000188313  
ENSG00000188315  
ENSG00000188316  
ENSG00000188321  
ENSG00000188322  
ENSG00000188338  
ENSG00000188342  
ENSG00000188352  
ENSG00000188373  
ENSG00000188375  
ENSG00000188385  
ENSG00000188386

ENSG00000188393  
ENSG00000188396  
ENSG00000188404  
ENSG00000188419  
ENSG00000188425  
ENSG00000188428  
ENSG00000188452  
ENSG00000188483  
ENSG00000188486  
ENSG00000188487  
ENSG00000188488  
ENSG00000188493  
ENSG00000188501  
ENSG00000188505  
ENSG00000188508  
ENSG00000188517  
ENSG00000188523  
ENSG00000188529  
ENSG00000188542  
ENSG00000188549  
ENSG00000188554  
ENSG00000188559  
ENSG00000188566  
ENSG00000188580  
ENSG00000188582  
ENSG00000188603  
ENSG00000188610  
ENSG00000188611  
ENSG00000188613  
ENSG00000188624  
ENSG00000188626  
ENSG00000188629  
ENSG00000188636  
ENSG00000188641  
ENSG00000188643  
ENSG00000188647  
ENSG00000188649  
ENSG00000188659

ENSG00000188674  
ENSG00000188690  
ENSG00000188694  
ENSG00000188706  
ENSG00000188707  
ENSG00000188730  
ENSG00000188735  
ENSG00000188739  
ENSG00000188760  
ENSG00000188761  
ENSG00000188763  
ENSG00000188766  
ENSG00000188770  
ENSG00000188771  
ENSG00000188778  
ENSG00000188779  
ENSG00000188783  
ENSG00000188785  
ENSG00000188786  
ENSG00000188800  
ENSG00000188803  
ENSG00000188807  
ENSG00000188811  
ENSG00000188816  
ENSG00000188817  
ENSG00000188818  
ENSG00000188822  
ENSG00000188833  
ENSG00000188846  
ENSG00000188848  
ENSG00000188859  
ENSG00000188868  
ENSG00000188883  
ENSG00000188895  
ENSG00000188897  
ENSG00000188910  
ENSG00000188916  
ENSG00000188917

ENSG00000188921  
ENSG00000188931  
ENSG00000188937  
ENSG00000188938  
ENSG00000188958  
ENSG00000188959  
ENSG00000188976  
ENSG00000188981  
ENSG00000188984  
ENSG00000188991  
ENSG00000188993  
ENSG00000188997  
ENSG00000189001  
ENSG00000189007  
ENSG00000189013  
ENSG00000189037  
ENSG00000189042  
ENSG00000189043  
ENSG00000189050  
ENSG00000189051  
ENSG00000189057  
ENSG00000189060  
ENSG00000189067  
ENSG00000189077  
ENSG00000189079  
ENSG00000189091  
ENSG00000189099  
ENSG00000189114  
ENSG00000189120  
ENSG00000189127  
ENSG00000189139  
ENSG00000189143  
ENSG00000189152  
ENSG00000189159  
ENSG00000189164  
ENSG00000189180  
ENSG00000189182  
ENSG00000189184

ENSG00000189221  
ENSG00000189227  
ENSG00000189233  
ENSG00000189241  
ENSG00000189266  
ENSG00000189269  
ENSG00000189280  
ENSG00000189283  
ENSG00000189292  
ENSG00000189298  
ENSG00000189299  
ENSG00000189306  
ENSG00000189308  
ENSG00000189319  
ENSG00000189320  
ENSG00000189325  
ENSG00000189334  
ENSG00000189337  
ENSG00000189339  
ENSG00000189357  
ENSG00000189367  
ENSG00000189375  
ENSG00000189377  
ENSG00000189401  
ENSG00000189403  
ENSG00000189410  
ENSG00000189430  
ENSG00000189431  
ENSG00000189433  
ENSG00000196072  
ENSG00000196074  
ENSG00000196083  
ENSG00000196090  
ENSG00000196092  
ENSG00000196110  
ENSG00000196118  
ENSG00000196123  
ENSG00000196126

ENSG00000196132  
ENSG00000196141  
ENSG00000196150  
ENSG00000196155  
ENSG00000196156  
ENSG00000196159  
ENSG00000196166  
ENSG00000196169  
ENSG00000196172  
ENSG00000196177  
ENSG00000196182  
ENSG00000196187  
ENSG00000196189  
ENSG00000196196  
ENSG00000196199  
ENSG00000196208  
ENSG00000196209  
ENSG00000196214  
ENSG00000196220  
ENSG00000196227  
ENSG00000196228  
ENSG00000196230  
ENSG00000196233  
ENSG00000196236  
ENSG00000196242  
ENSG00000196247  
ENSG00000196262  
ENSG00000196263  
ENSG00000196268  
ENSG00000196277  
ENSG00000196284  
ENSG00000196290  
ENSG00000196296  
ENSG00000196313  
ENSG00000196323  
ENSG00000196329  
ENSG00000196338  
ENSG00000196344



ENSG00000196345  
ENSG00000196353  
ENSG00000196358  
ENSG00000196361  
ENSG00000196363  
ENSG00000196367  
ENSG00000196368  
ENSG00000196369  
ENSG00000196371  
ENSG00000196372  
ENSG00000196376  
ENSG00000196378  
ENSG00000196381  
ENSG00000196387  
ENSG00000196388  
ENSG00000196396  
ENSG00000196405  
ENSG00000196408  
ENSG00000196411  
ENSG00000196415  
ENSG00000196417  
ENSG00000196418  
ENSG00000196431  
ENSG00000196437  
ENSG00000196440  
ENSG00000196449  
ENSG00000196453  
ENSG00000196456  
ENSG00000196458  
ENSG00000196459  
ENSG00000196470  
ENSG00000196476  
ENSG00000196482  
ENSG00000196498  
ENSG00000196502  
ENSG00000196504  
ENSG00000196505  
ENSG00000196510

ENSG00000196511  
ENSG00000196517  
ENSG00000196526  
ENSG00000196535  
ENSG00000196542  
ENSG00000196544  
ENSG00000196547  
ENSG00000196549  
ENSG00000196550  
ENSG00000196557  
ENSG00000196576  
ENSG00000196581  
ENSG00000196586  
ENSG00000196588  
ENSG00000196591  
ENSG00000196597  
ENSG00000196604  
ENSG00000196611  
ENSG00000196616  
ENSG00000196628  
ENSG00000196632  
ENSG00000196639  
ENSG00000196642  
ENSG00000196646  
ENSG00000196652  
ENSG00000196653  
ENSG00000196660  
ENSG00000196663  
ENSG00000196664  
ENSG00000196666  
ENSG00000196670  
ENSG00000196678  
ENSG00000196683  
ENSG00000196684  
ENSG00000196689  
ENSG00000196693  
ENSG00000196700  
ENSG00000196704

ENSG00000196705  
ENSG00000196712  
ENSG00000196715  
ENSG00000196724  
ENSG00000196730  
ENSG00000196739  
ENSG00000196743  
ENSG00000196747  
ENSG00000196748  
ENSG00000196754  
ENSG00000196757  
ENSG00000196776  
ENSG00000196781  
ENSG00000196782  
ENSG00000196792  
ENSG00000196793  
ENSG00000196800  
ENSG00000196811  
ENSG00000196814  
ENSG00000196821  
ENSG00000196844  
ENSG00000196850  
ENSG00000196859  
ENSG00000196862  
ENSG00000196865  
ENSG00000196866  
ENSG00000196867  
ENSG00000196872  
ENSG00000196876  
ENSG00000196878  
ENSG00000196911  
ENSG00000196912  
ENSG00000196914  
ENSG00000196917  
ENSG00000196924  
ENSG00000196932  
ENSG00000196935  
ENSG00000196937

ENSG00000196943  
ENSG00000196946  
ENSG00000196967  
ENSG00000196968  
ENSG00000196975  
ENSG00000196976  
ENSG00000196981  
ENSG00000196990  
ENSG00000196993  
ENSG00000196998  
ENSG00000197006  
ENSG00000197013  
ENSG00000197016  
ENSG00000197019  
ENSG00000197021  
ENSG00000197024  
ENSG00000197037  
ENSG00000197043  
ENSG00000197044  
ENSG00000197045  
ENSG00000197046  
ENSG00000197050  
ENSG00000197054  
ENSG00000197056  
ENSG00000197057  
ENSG00000197062  
ENSG00000197063  
ENSG00000197070  
ENSG00000197077  
ENSG00000197079  
ENSG00000197081  
ENSG00000197093  
ENSG00000197106  
ENSG00000197111  
ENSG00000197119  
ENSG00000197122  
ENSG00000197128  
ENSG00000197134

ENSG00000197142  
ENSG00000197147  
ENSG00000197150  
ENSG00000197157  
ENSG00000197162  
ENSG00000197165  
ENSG00000197168  
ENSG00000197170  
ENSG00000197172  
ENSG00000197177  
ENSG00000197181  
ENSG00000197183  
ENSG00000197217  
ENSG00000197226  
ENSG00000197245  
ENSG00000197249  
ENSG00000197256  
ENSG00000197261  
ENSG00000197265  
ENSG00000197272  
ENSG00000197275  
ENSG00000197283  
ENSG00000197302  
ENSG00000197312  
ENSG00000197323  
ENSG00000197324  
ENSG00000197343  
ENSG00000197353  
ENSG00000197355  
ENSG00000197361  
ENSG00000197362  
ENSG00000197363  
ENSG00000197364  
ENSG00000197372  
ENSG00000197375  
ENSG00000197380  
ENSG00000197381  
ENSG00000197386

ENSG00000197405  
ENSG00000197406  
ENSG00000197408  
ENSG00000197409  
ENSG00000197415  
ENSG00000197417  
ENSG00000197429  
ENSG00000197430  
ENSG00000197444  
ENSG00000197446  
ENSG00000197448  
ENSG00000197457  
ENSG00000197461  
ENSG00000197465  
ENSG00000197467  
ENSG00000197471  
ENSG00000197472  
ENSG00000197479  
ENSG00000197487  
ENSG00000197496  
ENSG00000197498  
ENSG00000197506  
ENSG00000197520  
ENSG00000197535  
ENSG00000197540  
ENSG00000197548  
ENSG00000197555  
ENSG00000197557  
ENSG00000197562  
ENSG00000197563  
ENSG00000197565  
ENSG00000197566  
ENSG00000197576  
ENSG00000197579  
ENSG00000197580  
ENSG00000197586  
ENSG00000197587  
ENSG00000197594

ENSG00000197601  
ENSG00000197603  
ENSG00000197608  
ENSG00000197614  
ENSG00000197620  
ENSG00000197622  
ENSG00000197629  
ENSG00000197635  
ENSG00000197641  
ENSG00000197646  
ENSG00000197647  
ENSG00000197651  
ENSG00000197658  
ENSG00000197683  
ENSG00000197696  
ENSG00000197702  
ENSG00000197705  
ENSG00000197712  
ENSG00000197713  
ENSG00000197714  
ENSG00000197724  
ENSG00000197728  
ENSG00000197745  
ENSG00000197746  
ENSG00000197747  
ENSG00000197753  
ENSG00000197763  
ENSG00000197766  
ENSG00000197769  
ENSG00000197771  
ENSG00000197776  
ENSG00000197779  
ENSG00000197780  
ENSG00000197782  
ENSG00000197808  
ENSG00000197816  
ENSG00000197818  
ENSG00000197822

ENSG00000197826  
ENSG00000197838  
ENSG00000197841  
ENSG00000197852  
ENSG00000197858  
ENSG00000197859  
ENSG00000197860  
ENSG00000197872  
ENSG00000197879  
ENSG00000197885  
ENSG00000197891  
ENSG00000197892  
ENSG00000197893  
ENSG00000197894  
ENSG00000197901  
ENSG00000197912  
ENSG00000197915  
ENSG00000197921  
ENSG00000197928  
ENSG00000197930  
ENSG00000197933  
ENSG00000197937  
ENSG00000197943  
ENSG00000197948  
ENSG00000197951  
ENSG00000197956  
ENSG00000197959  
ENSG00000197965  
ENSG00000197969  
ENSG00000197971  
ENSG00000197976  
ENSG00000197977  
ENSG00000197978  
ENSG00000197980  
ENSG00000197982  
ENSG00000197991  
ENSG00000198000  
ENSG00000198001



ENSG00000198015  
ENSG00000198018  
ENSG00000198019  
ENSG00000198028  
ENSG00000198039  
ENSG00000198040  
ENSG00000198042  
ENSG00000198046  
ENSG00000198049  
ENSG00000198053  
ENSG00000198055  
ENSG00000198060  
ENSG00000198074  
ENSG00000198077  
ENSG00000198081  
ENSG00000198083  
ENSG00000198087  
ENSG00000198088  
ENSG00000198090  
ENSG00000198092  
ENSG00000198093  
ENSG00000198099  
ENSG00000198105  
ENSG00000198108  
ENSG00000198113  
ENSG00000198121  
ENSG00000198125  
ENSG00000198131  
ENSG00000198133  
ENSG00000198142  
ENSG00000198146  
ENSG00000198157  
ENSG00000198160  
ENSG00000198162  
ENSG00000198168  
ENSG00000198169  
ENSG00000198171  
ENSG00000198178

ENSG00000198182  
ENSG00000198183  
ENSG00000198185  
ENSG00000198189  
ENSG00000198198  
ENSG00000198203  
ENSG00000198205  
ENSG00000198208  
ENSG00000198216  
ENSG00000198218  
ENSG00000198223  
ENSG00000198231  
ENSG00000198242  
ENSG00000198246  
ENSG00000198252  
ENSG00000198265  
ENSG00000198270  
ENSG00000198298  
ENSG00000198301  
ENSG00000198315  
ENSG00000198324  
ENSG00000198326  
ENSG00000198331  
ENSG00000198336  
ENSG00000198346  
ENSG00000198353  
ENSG00000198354  
ENSG00000198355  
ENSG00000198356  
ENSG00000198363  
ENSG00000198369  
ENSG00000198373  
ENSG00000198380  
ENSG00000198382  
ENSG00000198390  
ENSG00000198393  
ENSG00000198398  
ENSG00000198399

ENSG00000198408  
ENSG00000198420  
ENSG00000198429  
ENSG00000198431  
ENSG00000198435  
ENSG00000198453  
ENSG00000198455  
ENSG00000198466  
ENSG00000198467  
ENSG00000198478  
ENSG00000198482  
ENSG00000198483  
ENSG00000198488  
ENSG00000198492  
ENSG00000198498  
ENSG00000198502  
ENSG00000198513  
ENSG00000198515  
ENSG00000198517  
ENSG00000198520  
ENSG00000198521  
ENSG00000198522  
ENSG00000198523  
ENSG00000198535  
ENSG00000198542  
ENSG00000198551  
ENSG00000198553  
ENSG00000198554  
ENSG00000198561  
ENSG00000198570  
ENSG00000198574  
ENSG00000198576  
ENSG00000198585  
ENSG00000198586  
ENSG00000198589  
ENSG00000198590  
ENSG00000198598  
ENSG00000198610

ENSG00000198612  
ENSG00000198624  
ENSG00000198625  
ENSG00000198626  
ENSG00000198633  
ENSG00000198642  
ENSG00000198643  
ENSG00000198648  
ENSG00000198650  
ENSG00000198663  
ENSG00000198668  
ENSG00000198673  
ENSG00000198680  
ENSG00000198681  
ENSG00000198682  
ENSG00000198689  
ENSG00000198690  
ENSG00000198700  
ENSG00000198704  
ENSG00000198715  
ENSG00000198720  
ENSG00000198721  
ENSG00000198722  
ENSG00000198728  
ENSG00000198729  
ENSG00000198730  
ENSG00000198732  
ENSG00000198734  
ENSG00000198736  
ENSG00000198739  
ENSG00000198740  
ENSG00000198742  
ENSG00000198743  
ENSG00000198746  
ENSG00000198754  
ENSG00000198756  
ENSG00000198759  
ENSG00000198765

ENSG00000198768  
ENSG00000198771  
ENSG00000198780  
ENSG00000198783  
ENSG00000198785  
ENSG00000198791  
ENSG00000198792  
ENSG00000198793  
ENSG00000198794  
ENSG00000198795  
ENSG00000198796  
ENSG00000198797  
ENSG00000198798  
ENSG00000198799  
ENSG00000198805  
ENSG00000198807  
ENSG00000198812  
ENSG00000198814  
ENSG00000198815  
ENSG00000198821  
ENSG00000198824  
ENSG00000198825  
ENSG00000198829  
ENSG00000198830  
ENSG00000198833  
ENSG00000198836  
ENSG00000198837  
ENSG00000198839  
ENSG00000198841  
ENSG00000198842  
ENSG00000198843  
ENSG00000198844  
ENSG00000198846  
ENSG00000198851  
ENSG00000198853  
ENSG00000198854  
ENSG00000198858  
ENSG00000198862

ENSG00000198863  
ENSG00000198865  
ENSG00000198870  
ENSG00000198876  
ENSG00000198879  
ENSG00000198883  
ENSG00000198887  
ENSG00000198889  
ENSG00000198890  
ENSG00000198892  
ENSG00000198894  
ENSG00000198898  
ENSG00000198900  
ENSG00000198901  
ENSG00000198908  
ENSG00000198909  
ENSG00000198910  
ENSG00000198911  
ENSG00000198912  
ENSG00000198914  
ENSG00000198915  
ENSG00000198917  
ENSG00000198918  
ENSG00000198920  
ENSG00000198924  
ENSG00000198925  
ENSG00000198929  
ENSG00000198930  
ENSG00000198931  
ENSG00000198933  
ENSG00000198937  
ENSG00000198939  
ENSG00000198944  
ENSG00000198945  
ENSG00000198947  
ENSG00000198948  
ENSG00000198951  
ENSG00000198952

ENSG00000198954  
ENSG00000198959  
ENSG00000198960  
ENSG00000198961  
ENSG00000198963  
ENSG00000198964  
ENSG00000203485  
ENSG00000203618  
ENSG00000203666  
ENSG00000203667  
ENSG00000203668  
ENSG00000203685  
ENSG00000203697  
ENSG00000203705  
ENSG00000203710  
ENSG00000203727  
ENSG00000203730  
ENSG00000203734  
ENSG00000203737  
ENSG00000203747  
ENSG00000203760  
ENSG00000203772  
ENSG00000203778  
ENSG00000203783  
ENSG00000203784  
ENSG00000203785  
ENSG00000203786  
ENSG00000203791  
ENSG00000203797  
ENSG00000203805  
ENSG00000203812  
ENSG00000203837  
ENSG00000203867  
ENSG00000203870  
ENSG00000203879  
ENSG00000203880  
ENSG00000203896  
ENSG00000203923

ENSG00000203933  
ENSG00000203942  
ENSG00000203943  
ENSG00000203950  
ENSG00000203963  
ENSG00000203970  
ENSG00000203972  
ENSG00000203985  
ENSG00000203995  
ENSG00000204001  
ENSG00000204006  
ENSG00000204010  
ENSG00000204025  
ENSG00000204033  
ENSG00000204052  
ENSG00000204065  
ENSG00000204070  
ENSG00000204084  
ENSG00000204099  
ENSG00000204103  
ENSG00000204104  
ENSG00000204116  
ENSG00000204120  
ENSG00000204128  
ENSG00000204130  
ENSG00000204131  
ENSG00000204138  
ENSG00000204147  
ENSG00000204152  
ENSG00000204160  
ENSG00000204161  
ENSG00000204174  
ENSG00000204175  
ENSG00000204176  
ENSG00000204178  
ENSG00000204179  
ENSG00000204186  
ENSG00000204193



ENSG00000204195  
ENSG00000204209  
ENSG00000204217  
ENSG00000204219  
ENSG00000204227  
ENSG00000204231  
ENSG00000204237  
ENSG00000204248  
ENSG00000204252  
ENSG00000204256  
ENSG00000204262  
ENSG00000204267  
ENSG00000204271  
ENSG00000204278  
ENSG00000204287  
ENSG00000204296  
ENSG00000204301  
ENSG00000204304  
ENSG00000204305  
ENSG00000204308  
ENSG00000204310  
ENSG00000204314  
ENSG00000204323  
ENSG00000204335  
ENSG00000204344  
ENSG00000204347  
ENSG00000204348  
ENSG00000204356  
ENSG00000204366  
ENSG00000204370  
ENSG00000204371  
ENSG00000204381  
ENSG00000204386  
ENSG00000204392  
ENSG00000204397  
ENSG00000204406  
ENSG00000204414  
ENSG00000204420

ENSG00000204421  
ENSG00000204428  
ENSG00000204438  
ENSG00000204439  
ENSG00000204442  
ENSG00000204475  
ENSG00000204480  
ENSG00000204481  
ENSG00000204482  
ENSG00000204498  
ENSG00000204511  
ENSG00000204514  
ENSG00000204516  
ENSG00000204519  
ENSG00000204520  
ENSG00000204524  
ENSG00000204531  
ENSG00000204536  
ENSG00000204539  
ENSG00000204540  
ENSG00000204544  
ENSG00000204564  
ENSG00000204568  
ENSG00000204569  
ENSG00000204571  
ENSG00000204572  
ENSG00000204574  
ENSG00000204576  
ENSG00000204577  
ENSG00000204580  
ENSG00000204590  
ENSG00000204592  
ENSG00000204599  
ENSG00000204604  
ENSG00000204611  
ENSG00000204613  
ENSG00000204614  
ENSG00000204616

ENSG00000204618  
ENSG00000204619  
ENSG00000204642  
ENSG00000204644  
ENSG00000204655  
ENSG00000204661  
ENSG00000204669  
ENSG00000204671  
ENSG00000204673  
ENSG00000204681  
ENSG00000204682  
ENSG00000204683  
ENSG00000204688  
ENSG00000204694  
ENSG00000204713  
ENSG00000204764  
ENSG00000204767  
ENSG00000204822  
ENSG00000204842  
ENSG00000204843  
ENSG00000204851  
ENSG00000204869  
ENSG00000204889  
ENSG00000204899  
ENSG00000204909  
ENSG00000204918  
ENSG00000204919  
ENSG00000204920  
ENSG00000204922  
ENSG00000204923  
ENSG00000204930  
ENSG00000204936  
ENSG00000204946  
ENSG00000204947  
ENSG00000204950  
ENSG00000204952  
ENSG00000204954  
ENSG00000204956

ENSG00000204961  
ENSG00000204962  
ENSG00000204963  
ENSG00000204965  
ENSG00000204967  
ENSG00000204969  
ENSG00000204970  
ENSG00000204977  
ENSG00000204978  
ENSG00000204991  
ENSG00000205002  
ENSG00000205022  
ENSG00000205038  
ENSG00000205057  
ENSG00000205060  
ENSG00000205084  
ENSG00000205085  
ENSG00000205086  
ENSG00000205089  
ENSG00000205090  
ENSG00000205097  
ENSG00000205111  
ENSG00000205133  
ENSG00000205138  
ENSG00000205155  
ENSG00000205177  
ENSG00000205189  
ENSG00000205208  
ENSG00000205209  
ENSG00000205212  
ENSG00000205213  
ENSG00000205221  
ENSG00000205238  
ENSG00000205250  
ENSG00000205268  
ENSG00000205269  
ENSG00000205277  
ENSG00000205279

ENSG00000205302  
ENSG00000205309  
ENSG00000205323  
ENSG00000205336  
ENSG00000205339  
ENSG00000205352  
ENSG00000205356  
ENSG00000205363  
ENSG00000205403  
ENSG00000205413  
ENSG00000205420  
ENSG00000205423  
ENSG00000205436  
ENSG00000205456  
ENSG00000205457  
ENSG00000205476  
ENSG00000205502  
ENSG00000205531  
ENSG00000205560  
ENSG00000205571  
ENSG00000205572  
ENSG00000205581  
ENSG00000205639  
ENSG00000205649  
ENSG00000205659  
ENSG00000205678  
ENSG00000205683  
ENSG00000205710  
ENSG00000205726  
ENSG00000205730  
ENSG00000205765  
ENSG00000205777  
ENSG00000205784  
ENSG00000205795  
ENSG00000205808  
ENSG00000205810  
ENSG00000205835  
ENSG00000205838

ENSG00000205857  
ENSG00000205867  
ENSG00000205903  
ENSG00000205916  
ENSG00000205923  
ENSG00000205927  
ENSG00000205929  
ENSG00000205937  
ENSG00000205944  
ENSG00000205978  
ENSG00000205981  
ENSG00000206013  
ENSG00000206026  
ENSG00000206043  
ENSG00000206052  
ENSG00000206053  
ENSG00000206072  
ENSG00000206075  
ENSG00000206102  
ENSG00000206127  
ENSG00000206140  
ENSG00000206150  
ENSG00000206172  
ENSG00000206190  
ENSG00000206199  
ENSG00000206260  
ENSG00000206262  
ENSG00000206384  
ENSG00000206418  
ENSG00000206432  
ENSG00000206503  
ENSG00000206527  
ENSG00000206530  
ENSG00000206531  
ENSG00000206538  
ENSG00000206549  
ENSG00000206557  
ENSG00000206559

ENSG00000206560  
ENSG00000206561  
ENSG00000206562  
ENSG00000206579  
ENSG00000211445  
ENSG00000211448  
ENSG00000211450  
ENSG00000211452  
ENSG00000211455  
ENSG00000211456  
ENSG00000211460  
ENSG00000211584  
ENSG00000212124  
ENSG00000212128  
ENSG00000212710  
ENSG00000212719  
ENSG00000212722  
ENSG00000212724  
ENSG00000212747  
ENSG00000212899  
ENSG00000212916  
ENSG00000212993  
ENSG00000213015  
ENSG00000213020  
ENSG00000213022  
ENSG00000213024  
ENSG00000213047  
ENSG00000213064  
ENSG00000213066  
ENSG00000213096  
ENSG00000213160  
ENSG00000213171  
ENSG00000213185  
ENSG00000213186  
ENSG00000213203  
ENSG00000213213  
ENSG00000213215  
ENSG00000213218

ENSG00000213221  
ENSG00000213231  
ENSG00000213246  
ENSG00000213281  
ENSG00000213316  
ENSG00000213339  
ENSG00000213341  
ENSG00000213347  
ENSG00000213390  
ENSG00000213397  
ENSG00000213416  
ENSG00000213420  
ENSG00000213462  
ENSG00000213463  
ENSG00000213465  
ENSG00000213516  
ENSG00000213533  
ENSG00000213551  
ENSG00000213563  
ENSG00000213578  
ENSG00000213588  
ENSG00000213593  
ENSG00000213614  
ENSG00000213625  
ENSG00000213626  
ENSG00000213638  
ENSG00000213639  
ENSG00000213648  
ENSG00000213654  
ENSG00000213658  
ENSG00000213672  
ENSG00000213676  
ENSG00000213694  
ENSG00000213699  
ENSG00000213741  
ENSG00000213760  
ENSG00000213762  
ENSG00000213780



ENSG00000213782  
ENSG00000213799  
ENSG00000213809  
ENSG00000213853  
ENSG00000213859  
ENSG00000213865  
ENSG00000213889  
ENSG00000213892  
ENSG00000213903  
ENSG00000213906  
ENSG00000213918  
ENSG00000213923  
ENSG00000213937  
ENSG00000213965  
ENSG00000213973  
ENSG00000213977  
ENSG00000213983  
ENSG00000213988  
ENSG00000213995  
ENSG00000213996  
ENSG00000214013  
ENSG00000214021  
ENSG00000214022  
ENSG00000214026  
ENSG00000214046  
ENSG00000214063  
ENSG00000214078  
ENSG00000214097  
ENSG00000214102  
ENSG00000214113  
ENSG00000214114  
ENSG00000214128  
ENSG00000214140  
ENSG00000214212  
ENSG00000214215  
ENSG00000214216  
ENSG00000214253  
ENSG00000214300

ENSG00000214309  
ENSG00000214338  
ENSG00000214357  
ENSG00000214413  
ENSG00000214456  
ENSG00000214517  
ENSG00000214518  
ENSG00000214575  
ENSG00000214595  
ENSG00000214655  
ENSG00000214688  
ENSG00000214694  
ENSG00000214706  
ENSG00000214711  
ENSG00000214717  
ENSG00000214753  
ENSG00000214756  
ENSG00000214819  
ENSG00000214827  
ENSG00000214860  
ENSG00000214872  
ENSG00000214929  
ENSG00000214941  
ENSG00000214944  
ENSG00000214946  
ENSG00000214960  
ENSG00000215012  
ENSG00000215021  
ENSG00000215029  
ENSG00000215041  
ENSG00000215045  
ENSG00000215114  
ENSG00000215131  
ENSG00000215174  
ENSG00000215182  
ENSG00000215183  
ENSG00000215186  
ENSG00000215187

ENSG00000215193  
ENSG00000215217  
ENSG00000215218  
ENSG00000215252  
ENSG00000215271  
ENSG00000215277  
ENSG00000215301  
ENSG00000215343  
ENSG00000215372  
ENSG00000215397  
ENSG00000215421  
ENSG00000215440  
ENSG00000215454  
ENSG00000215472  
ENSG00000215474  
ENSG00000215475  
ENSG00000215529  
ENSG00000215568  
ENSG00000215595  
ENSG00000215612  
ENSG00000215695  
ENSG00000215712  
ENSG00000215717  
ENSG00000215784  
ENSG00000215788  
ENSG00000215790  
ENSG00000215845  
ENSG00000215853  
ENSG00000215883  
ENSG00000215915  
ENSG00000216490  
ENSG00000216588  
ENSG00000217128  
ENSG00000217555  
ENSG00000218336  
ENSG00000218739  
ENSG00000218819  
ENSG00000219200

ENSG00000219607  
ENSG00000219626  
ENSG00000220201  
ENSG00000220205  
ENSG00000221818  
ENSG00000221821  
ENSG00000221823  
ENSG00000221829  
ENSG00000221838  
ENSG00000221843  
ENSG00000221852  
ENSG00000221859  
ENSG00000221864  
ENSG00000221866  
ENSG00000221867  
ENSG00000221874  
ENSG00000221880  
ENSG00000221890  
ENSG00000221900  
ENSG00000221909  
ENSG00000221914  
ENSG00000221916  
ENSG00000221932  
ENSG00000221946  
ENSG00000221947  
ENSG00000221955  
ENSG00000221957  
ENSG00000221963  
ENSG00000221978  
ENSG00000221983  
ENSG00000221986  
ENSG00000221988  
ENSG00000222011  
ENSG00000222014  
ENSG00000222018  
ENSG00000222028  
ENSG00000222036  
ENSG00000222046

ENSG00000222047  
ENSG00000223496  
ENSG00000223547  
ENSG00000223658  
ENSG00000223802  
ENSG00000223865  
ENSG00000223953  
ENSG00000224051  
ENSG00000224089  
ENSG00000224383  
ENSG00000224420  
ENSG00000224470  
ENSG00000224531  
ENSG00000224586  
ENSG00000224940  
ENSG00000224982  
ENSG00000225110  
ENSG00000225190  
ENSG00000225362  
ENSG00000225526  
ENSG00000225663  
ENSG00000225830  
ENSG00000225921  
ENSG00000225968  
ENSG00000225973  
ENSG00000226023  
ENSG00000226174  
ENSG00000226321  
ENSG00000226479  
ENSG00000226600  
ENSG00000226650  
ENSG00000226685  
ENSG00000226742  
ENSG00000226763  
ENSG00000226784  
ENSG00000226807  
ENSG00000226887  
ENSG00000226929

ENSG00000227051  
ENSG00000227057  
ENSG00000227059  
ENSG00000227124  
ENSG00000227151  
ENSG00000227268  
ENSG00000227345  
ENSG00000227471  
ENSG00000227500  
ENSG00000227507  
ENSG00000228049  
ENSG00000228075  
ENSG00000228300  
ENSG00000228408  
ENSG00000228439  
ENSG00000228517  
ENSG00000228716  
ENSG00000228727  
ENSG00000228836  
ENSG00000229117  
ENSG00000229183  
ENSG00000229571  
ENSG00000229665  
ENSG00000229676  
ENSG00000229809  
ENSG00000229859  
ENSG00000230062  
ENSG00000230347  
ENSG00000230510  
ENSG00000230594  
ENSG00000230778  
ENSG00000230797  
ENSG00000230873  
ENSG00000230989  
ENSG00000231256  
ENSG00000231274  
ENSG00000231389  
ENSG00000231824

ENSG00000231852  
ENSG00000231924  
ENSG00000231925  
ENSG00000232070  
ENSG00000232119  
ENSG00000232196  
ENSG00000232237  
ENSG00000232258  
ENSG00000232423  
ENSG00000232653  
ENSG00000232810  
ENSG00000232838  
ENSG00000232859  
ENSG00000232995  
ENSG00000233087  
ENSG00000233198  
ENSG00000233276  
ENSG00000233436  
ENSG00000233608  
ENSG00000233670  
ENSG00000233932  
ENSG00000233954  
ENSG00000234127  
ENSG00000234186  
ENSG00000234278  
ENSG00000234409  
ENSG00000234438  
ENSG00000234444  
ENSG00000234545  
ENSG00000234602  
ENSG00000234616  
ENSG00000234829  
ENSG00000234965  
ENSG00000235034  
ENSG00000235098  
ENSG00000235109  
ENSG00000235173  
ENSG00000235194

ENSG00000235376  
ENSG00000235568  
ENSG00000235711  
ENSG00000235718  
ENSG00000235750  
ENSG00000235961  
ENSG00000236027  
ENSG00000236104  
ENSG00000236126  
ENSG00000236334  
ENSG00000236371  
ENSG00000236446  
ENSG00000236543  
ENSG00000236609  
ENSG00000236699  
ENSG00000237172  
ENSG00000237353  
ENSG00000237440  
ENSG00000237441  
ENSG00000237515  
ENSG00000237649  
ENSG00000237765  
ENSG00000237957  
ENSG00000238205  
ENSG00000238227  
ENSG00000239264  
ENSG00000239282  
ENSG00000239306  
ENSG00000239382  
ENSG00000239388  
ENSG00000239389  
ENSG00000239474  
ENSG00000239521  
ENSG00000239605  
ENSG00000239642  
ENSG00000239672  
ENSG00000239697  
ENSG00000239704



ENSG00000239789  
ENSG00000239810  
ENSG00000239857  
ENSG00000239886  
ENSG00000239887  
ENSG00000239900  
ENSG00000239961  
ENSG00000239998  
ENSG00000240050  
ENSG00000240065  
ENSG00000240184  
ENSG00000240204  
ENSG00000240224  
ENSG00000240230  
ENSG00000240303  
ENSG00000240344  
ENSG00000240505  
ENSG00000240583  
ENSG00000240654  
ENSG00000240682  
ENSG00000240694  
ENSG00000240764  
ENSG00000240771  
ENSG00000240849  
ENSG00000240871  
ENSG00000240891  
ENSG00000241058  
ENSG00000241106  
ENSG00000241119  
ENSG00000241123  
ENSG00000241127  
ENSG00000241186  
ENSG00000241233  
ENSG00000241258  
ENSG00000241322  
ENSG00000241360  
ENSG00000241399  
ENSG00000241468

ENSG00000241476  
ENSG00000241484  
ENSG00000241553  
ENSG00000241595  
ENSG00000241635  
ENSG00000241644  
ENSG00000241685  
ENSG00000241794  
ENSG00000241839  
ENSG00000241852  
ENSG00000241878  
ENSG00000241935  
ENSG00000241962  
ENSG00000241973  
ENSG00000241978  
ENSG00000242019  
ENSG00000242028  
ENSG00000242110  
ENSG00000242114  
ENSG00000242120  
ENSG00000242173  
ENSG00000242220  
ENSG00000242247  
ENSG00000242259  
ENSG00000242265  
ENSG00000242362  
ENSG00000242366  
ENSG00000242372  
ENSG00000242498  
ENSG00000242515  
ENSG00000242550  
ENSG00000242616  
ENSG00000242689  
ENSG00000242715  
ENSG00000242732  
ENSG00000242802  
ENSG00000242852  
ENSG00000242866

ENSG00000242950  
ENSG00000243056  
ENSG00000243073  
ENSG00000243130  
ENSG00000243135  
ENSG00000243147  
ENSG00000243156  
ENSG00000243207  
ENSG00000243232  
ENSG00000243244  
ENSG00000243279  
ENSG00000243284  
ENSG00000243317  
ENSG00000243335  
ENSG00000243364  
ENSG00000243414  
ENSG00000243440  
ENSG00000243477  
ENSG00000243543  
ENSG00000243566  
ENSG00000243627  
ENSG00000243646  
ENSG00000243667  
ENSG00000243678  
ENSG00000243709  
ENSG00000243725  
ENSG00000243749  
ENSG00000243772  
ENSG00000243789  
ENSG00000243811  
ENSG00000243902  
ENSG00000243943  
ENSG00000243978  
ENSG00000244045  
ENSG00000244094  
ENSG00000244115  
ENSG00000244122  
ENSG00000244165

ENSG00000244187  
ENSG00000244242  
ENSG00000244274  
ENSG00000244405  
ENSG00000244462  
ENSG00000244474  
ENSG00000244476  
ENSG00000244486  
ENSG00000244537  
ENSG00000244607  
ENSG00000244617  
ENSG00000244687  
ENSG00000244694  
ENSG00000244754  
ENSG00000245680  
ENSG00000245848  
ENSG00000246705  
ENSG00000247077  
ENSG00000247315  
ENSG00000247596  
ENSG00000247746  
ENSG00000248098  
ENSG00000248099  
ENSG00000248144  
ENSG00000248329  
ENSG00000248383  
ENSG00000248385  
ENSG00000248485  
ENSG00000248592  
ENSG00000248643  
ENSG00000248672  
ENSG00000248713  
ENSG00000248746  
ENSG00000248871  
ENSG00000248905  
ENSG00000248919  
ENSG00000249115  
ENSG00000249139

ENSG00000249158  
ENSG00000249242  
ENSG00000249437  
ENSG00000249459  
ENSG00000249471  
ENSG00000249709  
ENSG00000249853  
ENSG00000249884  
ENSG00000249915  
ENSG00000249931  
ENSG00000249992  
ENSG00000250021  
ENSG00000250120  
ENSG00000250151  
ENSG00000250305  
ENSG00000250312  
ENSG00000250317  
ENSG00000250423  
ENSG00000250486  
ENSG00000250510  
ENSG00000250565  
ENSG00000250709  
ENSG00000250741  
ENSG00000251192  
ENSG00000251201  
ENSG00000251247  
ENSG00000251258  
ENSG00000251287  
ENSG00000251369  
ENSG00000251380  
ENSG00000251493  
ENSG00000251503  
ENSG00000251664  
ENSG00000253148  
ENSG00000253159  
ENSG00000253250  
ENSG00000253276  
ENSG00000253293

ENSG00000253304  
ENSG00000253305  
ENSG00000253313  
ENSG00000253368  
ENSG00000253485  
ENSG00000253537  
ENSG00000253626  
ENSG00000253710  
ENSG00000253719  
ENSG00000253729  
ENSG00000253731  
ENSG00000253767  
ENSG00000253797  
ENSG00000253831  
ENSG00000253846  
ENSG00000253873  
ENSG00000253910  
ENSG00000253953  
ENSG00000253958  
ENSG00000254004  
ENSG00000254087  
ENSG00000254093  
ENSG00000254122  
ENSG00000254221  
ENSG00000254245  
ENSG00000254415  
ENSG00000254440  
ENSG00000254470  
ENSG00000254505  
ENSG00000254535  
ENSG00000254585  
ENSG00000254636  
ENSG00000254685  
ENSG00000254726  
ENSG00000254827  
ENSG00000254858  
ENSG00000254901  
ENSG00000254986

ENSG00000254996  
ENSG00000254997  
ENSG00000254999  
ENSG00000255072  
ENSG00000255112  
ENSG00000255245  
ENSG00000255251  
ENSG00000255302  
ENSG00000255346  
ENSG00000255378  
ENSG00000255398  
ENSG00000255408  
ENSG00000255423  
ENSG00000255501  
ENSG00000255529  
ENSG00000255582  
ENSG00000255587  
ENSG00000255690  
ENSG00000255823  
ENSG00000255833  
ENSG00000255837  
ENSG00000255974  
ENSG00000256043  
ENSG00000256045  
ENSG00000256053  
ENSG00000256087  
ENSG00000256162  
ENSG00000256222  
ENSG00000256229  
ENSG00000256235  
ENSG00000256294  
ENSG00000256374  
ENSG00000256537  
ENSG00000256574  
ENSG00000256646  
ENSG00000256660  
ENSG00000256671  
ENSG00000256683

ENSG00000256713  
ENSG00000256771  
ENSG00000256870  
ENSG00000256892  
ENSG00000256977  
ENSG00000257017  
ENSG00000257093  
ENSG00000257103  
ENSG00000257108  
ENSG00000257218  
ENSG00000257335  
ENSG00000257365  
ENSG00000257594  
ENSG00000257704  
ENSG00000257923  
ENSG00000257949  
ENSG00000258102  
ENSG00000258227  
ENSG00000258289  
ENSG00000258315  
ENSG00000258366  
ENSG00000258405  
ENSG00000258429  
ENSG00000258436  
ENSG00000258555  
ENSG00000258588  
ENSG00000258643  
ENSG00000258644  
ENSG00000258659  
ENSG00000258818  
ENSG00000258839  
ENSG00000258873  
ENSG00000258986  
ENSG00000259024  
ENSG00000259075  
ENSG00000259112  
ENSG00000259120  
ENSG00000259224



ENSG00000259288  
ENSG00000259305  
ENSG00000259316  
ENSG00000259332  
ENSG00000259399  
ENSG00000259431  
ENSG00000259753  
ENSG00000259803  
ENSG00000259823  
ENSG00000259916  
ENSG00000259956  
ENSG00000260027  
ENSG00000260097  
ENSG00000260220  
ENSG00000260238  
ENSG00000260286  
ENSG00000260314  
ENSG00000260428  
ENSG00000260458  
ENSG00000260596  
ENSG00000260691  
ENSG00000260807  
ENSG00000260903  
ENSG00000260916  
ENSG00000261052  
ENSG00000261115  
ENSG00000261221  
ENSG00000261272  
ENSG00000261371  
ENSG00000261456  
ENSG00000261459  
ENSG00000261509  
ENSG00000261594  
ENSG00000261609  
ENSG00000261667  
ENSG00000261678  
ENSG00000261701  
ENSG00000261740

ENSG00000261787  
ENSG00000261794  
ENSG00000261796  
ENSG00000261934  
ENSG00000262179  
ENSG00000262209  
ENSG00000262246  
ENSG00000262484  
ENSG00000262576  
ENSG00000262633  
ENSG00000262655  
ENSG00000262664  
ENSG00000262814  
ENSG00000262874  
ENSG00000262919  
ENSG00000263001  
ENSG00000263002  
ENSG00000263155  
ENSG00000263201  
ENSG00000263353  
ENSG00000263464  
ENSG00000263465  
ENSG00000263513  
ENSG00000263528  
ENSG00000263715  
ENSG00000263761  
ENSG00000263956  
ENSG00000263961  
ENSG00000264058  
ENSG00000264230  
ENSG00000264343  
ENSG00000264364  
ENSG00000264522  
ENSG00000264717  
ENSG00000264813  
ENSG00000265107  
ENSG00000265190  
ENSG00000265241

ENSG00000265354  
ENSG00000265763  
ENSG00000265808  
ENSG00000265817  
ENSG00000265972  
ENSG00000266028  
ENSG00000266074  
ENSG00000266094  
ENSG00000266173  
ENSG00000266265  
ENSG00000266302  
ENSG00000266338  
ENSG00000266412  
ENSG00000266472  
ENSG00000266524  
ENSG00000266964  
ENSG00000267041  
ENSG00000267059  
ENSG00000267060  
ENSG00000267221  
ENSG00000267368  
ENSG00000267467  
ENSG00000267508  
ENSG00000267534  
ENSG00000267680  
ENSG00000267855  
ENSG00000267909  
ENSG00000267978  
ENSG00000268009  
ENSG00000268043  
ENSG00000268104  
ENSG00000268182  
ENSG00000268221  
ENSG00000268223  
ENSG00000268350  
ENSG00000268447  
ENSG00000268500  
ENSG00000268606

ENSG00000268916  
ENSG00000268940  
ENSG00000269096  
ENSG00000269113  
ENSG00000269190  
ENSG00000269313  
ENSG00000269335  
ENSG00000269343  
ENSG00000269404  
ENSG00000269433  
ENSG00000269502  
ENSG00000269526  
ENSG00000269556  
ENSG00000269586  
ENSG00000269713  
ENSG00000269743  
ENSG00000269791  
ENSG00000269858  
ENSG00000269897  
ENSG00000269955  
ENSG00000269964  
ENSG00000270024  
ENSG00000270136  
ENSG00000270181  
ENSG00000270339  
ENSG00000270379  
ENSG00000270601  
ENSG00000270617  
ENSG00000270629  
ENSG00000270647  
ENSG00000270672  
ENSG00000270757  
ENSG00000270885  
ENSG00000270946  
ENSG00000271092  
ENSG00000271254  
ENSG00000271303  
ENSG00000271383

ENSG00000271447  
ENSG00000271503  
ENSG00000271567  
ENSG00000271601  
ENSG00000271605  
ENSG00000272031  
ENSG00000272047  
ENSG00000272196  
ENSG00000272325  
ENSG00000272391  
ENSG00000272410  
ENSG00000272414  
ENSG00000272573  
ENSG00000272636  
ENSG00000272674  
ENSG00000272886  
ENSG00000272899  
ENSG00000272916  
ENSG00000272968  
ENSG00000273045  
ENSG00000273046  
ENSG00000273079  
ENSG00000273136  
ENSG00000273173  
ENSG00000273217  
ENSG00000273259  
ENSG00000273274  
ENSG00000273559  
ENSG00000273590  
ENSG00000273604  
ENSG00000273611  
ENSG00000273706  
ENSG00000273749  
ENSG00000273820  
ENSG00000273899  
ENSG00000273976  
ENSG00000274070  
ENSG00000274180

ENSG00000274211  
ENSG00000274286  
ENSG00000274523  
ENSG00000274588  
ENSG00000274600  
ENSG00000274749  
ENSG00000274997  
ENSG00000275004  
ENSG00000275023  
ENSG00000275034  
ENSG00000275052  
ENSG00000275066  
ENSG00000275074  
ENSG00000275111  
ENSG00000275152  
ENSG00000275183  
ENSG00000275302  
ENSG00000275356  
ENSG00000275410  
ENSG00000275553  
ENSG00000275591  
ENSG00000275700  
ENSG00000275722  
ENSG00000275793  
ENSG00000275832  
ENSG00000275896  
ENSG00000275993  
ENSG00000276043  
ENSG00000276070  
ENSG00000276076  
ENSG00000276085  
ENSG00000276203  
ENSG00000276231  
ENSG00000276256  
ENSG00000276289  
ENSG00000276293  
ENSG00000276345  
ENSG00000276409

ENSG00000276547  
ENSG00000276600  
ENSG00000276644  
ENSG00000276760  
ENSG00000277117  
ENSG00000277196  
ENSG00000277203  
ENSG00000277258  
ENSG00000277288  
ENSG00000277322  
ENSG00000277363  
ENSG00000277399  
ENSG00000277443  
ENSG00000277494  
ENSG00000277586  
ENSG00000277632  
ENSG00000277758  
ENSG00000277893  
ENSG00000277957  
ENSG00000277972  
ENSG00000278023  
ENSG00000278053  
ENSG00000278057  
ENSG00000278129  
ENSG00000278195  
ENSG00000278259  
ENSG00000278318  
ENSG00000278463  
ENSG00000278505  
ENSG00000278522  
ENSG00000278535  
ENSG00000278540  
ENSG00000278558  
ENSG00000278570  
ENSG00000278615  
ENSG00000278619  
ENSG00000278662  
ENSG00000278685

ENSG00000278817  
ENSG00000278845  
ENSG00000278848  
ENSG00000278961  
ENSG00000279362  
ENSG00000279782  
ENSG00000279804  
ENSG00000280071  
ENSG00000280267  
ENSG00000280433  
ENSG00000280755  
ENSG00000280789  
ENSG00000280987  
ENSG00000281028  
ENSG00000281766  
ENSG00000281887  
ENSG00000281938  
ENSG00000281991  
ENSG00000282301  
ENSG00000282608  
ENSG00000282960  
ENSG00000283088



## Overlap Results

Collection(s): H  
 # overlaps shown: 10  
 # genesets in collections: 50  
 # genes in comparison (n): 277  
 # genes in universe (N): 45956

| Gene Set Name                              | # Genes in Gen | Description                                                                                    | # Genes in Overlap | k/K    | p-value  | FDR q-value |
|--------------------------------------------|----------------|------------------------------------------------------------------------------------------------|--------------------|--------|----------|-------------|
| HALLMARK_HEDGEHOG_SIGNALING                | 36             | Genes up-regulated by activation of hedgehog signaling.                                        | 7                  | 0.1944 | 1.93E-09 | 9.63E-08    |
| HALLMARK_EPITHELIAL_MESENCHYMAL_TRANSITION | 200            | Genes defining epithelial-mesenchymal transition as in wound healing, fibrosis and metastasis. | 11                 | 0.055  | 4.44E-08 | 1.11E-06    |
| HALLMARK_UV_RESPONSE_DN                    | 144            | Genes down-regulated in response to ultraviolet (UV) radiation.                                | 8                  | 0.0556 | 2.92E-06 | 3.32E-05    |
| HALLMARK_HYPOXIA                           | 200            | Genes up-regulated in response to low oxygen levels (hypoxia).                                 | 9                  | 0.045  | 3.98E-06 | 3.32E-05    |
| HALLMARK_P53_PATHWAY                       | 200            | Genes involved in p53 pathways and networks.                                                   | 9                  | 0.045  | 3.98E-06 | 3.32E-05    |
| HALLMARK_TNFA_SIGNALING_VIA_NFKB           | 200            | Genes regulated by NF-kB in response to TNF [GeneID=7124].                                     | 9                  | 0.045  | 3.98E-06 | 3.32E-05    |
| HALLMARK_ESTROGEN_RESPONSE_LATE            | 200            | Genes defining late response to estrogen.                                                      | 6                  | 0.03   | 1.41E-03 | 8.83E-03    |
| HALLMARK_KRAS_SIGNALING_UP                 | 200            | Genes up-regulated by KRAS activation.                                                         | 6                  | 0.03   | 1.41E-03 | 8.83E-03    |
| HALLMARK_ANDROGEN_RESPONSE                 | 101            | Genes defining response to androgens.                                                          | 4                  | 0.0396 | 3.34E-03 | 1.85E-02    |
| HALLMARK_MYOGENESIS                        | 200            | Genes involved in development of skeletal muscle (myogenesis).                                 | 5                  | 0.025  | 7.51E-03 | 3.76E-02    |

## Gene/Gene Set Overlap Matrix

| Entrez Gene Id | Gene Symbol | Gene Description                      | HALLMARK_HEDGEHOG_SIGNALING | HALLMARK_EPITHELIAL_MESENCHYMAL_TRANSITION | HALLMARK_UV_RESPONSE_DN | HALLMARK_HYPOXIA |
|----------------|-------------|---------------------------------------|-----------------------------|--------------------------------------------|-------------------------|------------------|
| 7857           | SCG2        | secretogranin II                      |                             |                                            |                         |                  |
| 7436           | VLDLR       | very low density lipoprotein receptor |                             |                                            |                         |                  |

|       |          |                                                                                   |                                            |                         |
|-------|----------|-----------------------------------------------------------------------------------|--------------------------------------------|-------------------------|
| 8829  | NRP1     | neuropilin 1                                                                      | HALLMARK_HEDGEHOG_SIGNALING                | HALLMARK_UV_RESPONSE_DN |
| 43    | ACHE     | acetylcholinesterase                                                              | HALLMARK_HEDGEHOG_SIGNALING                |                         |
| 23493 | HEY2     | hairy/enhancer-of-split related with YRPW motif 2                                 | HALLMARK_HEDGEHOG_SIGNALING                |                         |
| 7088  | TLE1     | transducin-like enhancer of split 1 (E(sp1) homolog)                              | HALLMARK_HEDGEHOG_SIGNALING                |                         |
| 8633  | UNC5C    | unc-5 homolog C (C. elegans)                                                      | HALLMARK_HEDGEHOG_SIGNALING                |                         |
| 1281  | COL3A1   | collagen, type III, alpha 1                                                       | HALLMARK_EPITHELIAL_MESENCHYMAL_TRANSITION | HALLMARK_UV_RESPONSE_DN |
| 3725  | JUN      | jun proto-oncogene                                                                | HALLMARK_EPITHELIAL_MESENCHYMAL_TRANSITION | HALLMARK_HYPERPLASIA    |
| 1647  | GADD45A  | growth arrest and DNA-damage-inducible, alpha                                     | HALLMARK_EPITHELIAL_MESENCHYMAL_TRANSITION |                         |
| 3624  | INHBA    | inhibin, beta A                                                                   | HALLMARK_EPITHELIAL_MESENCHYMAL_TRANSITION |                         |
| 2669  | GEM      | GTP binding protein overexpressed in skeletal muscle                              | HALLMARK_EPITHELIAL_MESENCHYMAL_TRANSITION |                         |
| 6387  | CXCL12   | chemokine (C-X-C motif) ligand 12                                                 | HALLMARK_EPITHELIAL_MESENCHYMAL_TRANSITION |                         |
| 10409 | BASP1    | brain abundant, membrane attached signal protein 1                                | HALLMARK_EPITHELIAL_MESENCHYMAL_TRANSITION |                         |
| 50509 | COL5A3   | collagen, type V, alpha 3                                                         | HALLMARK_EPITHELIAL_MESENCHYMAL_TRANSITION |                         |
| 6424  | SFRP4    | secreted frizzled-related protein 4                                               | HALLMARK_EPITHELIAL_MESENCHYMAL_TRANSITION |                         |
| 7431  | VIM      | vimentin                                                                          | HALLMARK_EPITHELIAL_MESENCHYMAL_TRANSITION |                         |
| 10370 | CITED2   | Cbp/p300-interacting transactivator, with Glu/Asp-rich carboxy-terminal domain, 2 | HALLMARK_UV_RESPONSE_DN                    | HALLMARK_HYPERPLASIA    |
| 2908  | NR3C1    | nuclear receptor subfamily 3, group C, member 1 (glucocorticoid receptor)         | HALLMARK_UV_RESPONSE_DN                    | HALLMARK_HYPERPLASIA    |
| 3488  | IGFBP5   | insulin-like growth factor binding protein 5                                      | HALLMARK_UV_RESPONSE_DN                    |                         |
| 4781  | NFIB     | nuclear factor I/B                                                                | HALLMARK_UV_RESPONSE_DN                    |                         |
| 9975  | NR1D2    | nuclear receptor subfamily 1, group D, member 2                                   | HALLMARK_UV_RESPONSE_DN                    |                         |
| 694   | BTG1     | B-cell translocation gene 1, anti-proliferative                                   |                                            | HALLMARK_HYPERPLASIA    |
| 5224  | PGAM2    | phosphoglycerate mutase 2 (muscle)                                                |                                            | HALLMARK_HYPERPLASIA    |
| 1028  | CDKN1C   | cyclin-dependent kinase inhibitor 1C (p57, Kip2)                                  |                                            | HALLMARK_HYPERPLASIA    |
| 10891 | PPARGC1A | peroxisome proliferator-activated receptor gamma, coactivator 1 alpha             |                                            | HALLMARK_HYPERPLASIA    |
| 9957  | HS3ST1   | heparan sulfate (glucosamine) 3-O-sulfotransferase 1                              |                                            | HALLMARK_HYPERPLASIA    |
| 10769 | PLK2     | polo-like kinase 2                                                                |                                            |                         |
| 10628 | TXNIP    | thioredoxin interacting protein                                                   |                                            |                         |
| 26471 | NUPR1    | nuclear protein, transcriptional regulator, 1                                     |                                            |                         |
| 8493  | PPM1D    | protein phosphatase, Mg <sup>2+</sup> /Mn <sup>2+</sup> dependent, 1D             |                                            |                         |
| 3006  | HIST1H1C | histone cluster 1, H1c                                                            |                                            |                         |
| 4193  | MDM2     | Mdm2 p53 binding protein homolog (mouse)                                          |                                            |                         |
| 65986 | ZBTB10   | zinc finger and BTB domain containing 10                                          |                                            |                         |
| 604   | BCL6     | B-cell CLL/lymphoma 6                                                             |                                            |                         |
| 4082  | MARCKS   | myristoylated alanine-rich protein kinase C substrate                             |                                            |                         |
| 11098 | PRSS23   | protease, serine, 23                                                              |                                            |                         |
| 2296  | FOXC1    | forkhead box C1                                                                   |                                            |                         |
| 8204  | NRIP1    | nuclear receptor interacting protein 1                                            |                                            |                         |
| 5733  | PTGER3   | prostaglandin E receptor 3 (subtype EP3)                                          |                                            |                         |

|           |              |                                                                                                               |
|-----------|--------------|---------------------------------------------------------------------------------------------------------------|
| 10610     | ST6GALNAC2   | ST6 (alpha-N-acetyl-neuraminyl-2,3-beta-galactosyl-1,3)-N-acetylgalactosaminide alpha-2,6-sialyltransferase 2 |
| 6662      | SOX9         | SRY (sex determining region Y)-box 9                                                                          |
| 10912     | GADD45G      | growth arrest and DNA-damage-inducible, gamma                                                                 |
| 2254      | FGF9         | fibroblast growth factor 9 (glia-activating factor)                                                           |
| 6616      | SNAP25       | synaptosomal-associated protein, 25kDa                                                                        |
| 84159     | ARID5B       | AT rich interactive domain 5B (MRF1-like)                                                                     |
| 4094      | MAF          | v-maf musculoaponeurotic fibrosarcoma oncogene homolog (avian)                                                |
| 54407     | SLC38A2      | solute carrier family 38, member 2                                                                            |
| 88        | ACTN2        | actinin, alpha 2                                                                                              |
| 10468     | FST          | follistatin                                                                                                   |
| 90427     | BMF          | Bcl2 modifying factor                                                                                         |
| 1006      | CDH8         | cadherin 8, type 2                                                                                            |
| 11096     | ADAMTS5      | ADAM metallopeptidase with thrombospondin type 1 motif, 5                                                     |
| 147       | ADRA1B       | adrenergic, alpha-1B-, receptor                                                                               |
| 1233      | CCR4         | chemokine (C-C motif) receptor 4                                                                              |
| 6335      | SCN9A        | sodium channel, voltage-gated, type IX, alpha subunit                                                         |
| 3759      | KCNJ2        | potassium inwardly-rectifying channel, subfamily J, member 2                                                  |
| 5099      | PCDH7        | protocadherin 7                                                                                               |
| 7439      | BEST1        | bestrophin 1                                                                                                  |
| 5334      | PLCL1        | phospholipase C-like 1                                                                                        |
| 83729     | INHBE        | inhibin, beta E                                                                                               |
| 1946      | EFNA5        | ephrin-A5                                                                                                     |
| 4211      | MEIS1        | Meis homeobox 1                                                                                               |
| 4306      | NR3C2        | nuclear receptor subfamily 3, group C, member 2                                                               |
| 6579      | SLCO1A2      | solute carrier organic anion transporter family, member 1A2                                                   |
| 51384     | WNT16        | wingless-type MMTV integration site family, member 16                                                         |
| 727       | C5           | complement component 5                                                                                        |
| 552900    | BOLA2        | bolA homolog 2 (E. coli)                                                                                      |
| 10512     | SEMA3C       | sema domain, immunoglobulin domain (Ig), short basic domain, secreted, (semaphorin) 3C                        |
| 100048912 | CDKN2B-AS    | CDKN2B antisense RNA (non-protein coding)                                                                     |
| 100133941 | CD24         | CD24 molecule                                                                                                 |
| 100287082 | LOC100287082 | uncharacterized LOC100287082                                                                                  |
| 100421577 | LOC100421577 | family with sequence similarity 21, member A pseudogene                                                       |
| 100506421 | LOC100506421 | uncharacterized LOC100506421                                                                                  |
| 10082     | GPC6         | glypican 6                                                                                                    |
| 10154     | PLXNC1       | plexin C1                                                                                                     |
| 101927282 |              | &nbsp;                                                                                                        |
| 101927345 |              | &nbsp;                                                                                                        |

|           |           |                                                                   |
|-----------|-----------|-------------------------------------------------------------------|
| 101927501 | &nbsp;    |                                                                   |
| 101927631 | &nbsp;    |                                                                   |
| 101928371 | &nbsp;    |                                                                   |
| 101928978 | &nbsp;    |                                                                   |
| 101929333 | &nbsp;    |                                                                   |
| 10194     | TSHZ1     | teashirt zinc finger homeobox 1                                   |
| 102723166 |           | &nbsp;                                                            |
| 105       | ADARB2    | adenosine deaminase, RNA-specific, B2                             |
| 105371083 |           | &nbsp;                                                            |
| 105378763 |           | &nbsp;                                                            |
| 10568     | SLC34A2   | solute carrier family 34 (sodium phosphate), member 2             |
| 10900     | RUNDC3A   | RUN domain containing 3A                                          |
| 11228     | RASSF8    | Ras association (RalGDS/AF-6) domain family (N-terminal) member 8 |
| 11278     | KLF12     | Kruppel-like factor 12                                            |
| 11281     | POU6F2    | POU class 6 homeobox 2                                            |
| 112885    | PHF21B    | PHD finger protein 21B                                            |
| 114795    | TMEM132B  | transmembrane protein 132B                                        |
| 115111    | SLC26A7   | solute carrier family 26, member 7                                |
| 116372    | LYPD1     | LY6/PLAUR domain containing 1                                     |
| 117583    | PARD3B    | par-3 partitioning defective 3 homolog B (C. elegans)             |
| 120114    | FAT3      | FAT tumor suppressor homolog 3 (Drosophila)                       |
| 120146    | TRIM64    | tripartite motif containing 64                                    |
| 122945    | NOXRED1   | NADP-dependent oxidoreductase domain containing 1                 |
| 1270      | CNTF      | ciliary neurotrophic factor                                       |
| 128153    | SPATA17   | spermatogenesis associated 17                                     |
| 128312    | HIST3H2BB | histone cluster 3, H2bb                                           |
| 128346    | C1orf162  | chromosome 1 open reading frame 162                               |
| 129530    | LYG1      | lysozyme G-like 1                                                 |
| 129868    | TRIM43    | tripartite motif containing 43                                    |
| 136288    | C7orf57   | chromosome 7 open reading frame 57                                |
| 143686    | SESN3     | sestrin 3                                                         |
| 147660    | ZNF578    | zinc finger protein 578                                           |
| 147686    | ZNF418    | zinc finger protein 418                                           |
| 148523    | C1orf51   | chromosome 1 open reading frame 51                                |
| 148709    | LOC148709 | actin pseudogene                                                  |
| 149281    | METTL11B  | methyltransferase like 11B                                        |
| 153020    | RASGEF1B  | RasGEF domain family, member 1B                                   |
| 153222    | C5orf41   | chromosome 5 open reading frame 41                                |

|        |           |                                                                               |
|--------|-----------|-------------------------------------------------------------------------------|
| 154215 | NKAIN2    | Na <sup>+</sup> /K <sup>+</sup> transporting ATPase interacting 2             |
| 157489 | SDAD1P1   | SDA1 domain containing 1 pseudogene 1                                         |
| 157773 | C8orf48   | chromosome 8 open reading frame 48                                            |
| 158160 | HSD17B7P2 | hydroxysteroid (17-beta) dehydrogenase 7 pseudogene 2                         |
| 1602   | DACH1     | dachshund homolog 1 (Drosophila)                                              |
| 170690 | ADAMTS16  | ADAM metallopeptidase with thrombospondin type 1 motif, 16                    |
| 1951   | CELSR3    | cadherin, EGF LAG seven-pass G-type receptor 3 (flamingo homolog, Drosophila) |
| 195828 | ZNF367    | zinc finger protein 367                                                       |
| 1993   | ELAVL2    | ELAV (embryonic lethal, abnormal vision, Drosophila)-like 2 (Hu antigen B)    |
| 201456 | FBXO15    | F-box protein 15                                                              |
| 201516 | ZSCAN4    | zinc finger and SCAN domain containing 4                                      |
| 201625 | DNAH12    | dynein, axonemal, heavy chain 12                                              |
| 202333 | CMYA5     | cardiomyopathy associated 5                                                   |
| 2042   | EPHA3     | EPH receptor A3                                                               |
| 2043   | EPHA4     | EPH receptor A4                                                               |
| 2066   | ERBB4     | v-erb-a erythroblastic leukemia viral oncogene homolog 4 (avian)              |
| 219539 | YPEL4     | yippee-like 4 (Drosophila)                                                    |
| 220965 | FAM13C    | family with sequence similarity 13, member C                                  |
| 23213  | SULF1     | sulfatase 1                                                                   |
| 23635  | SSBP2     | single-stranded DNA binding protein 2                                         |
| 23768  | FLRT2     | fibronectin leucine rich transmembrane protein 2                              |
| 254158 | CXorf58   | chromosome X open reading frame 58                                            |
| 255743 | NPNT      | nephronectin                                                                  |
| 255928 | SYT14     | synaptotagmin XIV                                                             |
| 257106 | ARHGAP30  | Rho GTPase activating protein 30                                              |
| 25788  | RAD54B    | RAD54 homolog B (S. cerevisiae)                                               |
| 25849  | PARM1     | prostate androgen-regulated mucin-like protein 1                              |
| 26040  | SETBP1    | SET binding protein 1                                                         |
| 27086  | FOXP1     | forkhead box P1                                                               |
| 27113  | BBC3      | BCL2 binding component 3                                                      |
| 27145  | FILIP1    | filamin A interacting protein 1                                               |
| 27233  | SULT1C4   | sulfotransferase family, cytosolic, 1C, member 4                              |
| 2737   | GLI3      | GLI family zinc finger 3                                                      |
| 283116 | LOC283116 | tripartite motif-containing protein LOC642612-like                            |
| 283131 | NEAT1     | nuclear paraspeckle assembly transcript 1 (non-protein coding)                |
| 285429 | DCAF4L1   | DDB1 and CUL4 associated factor 4-like 1                                      |
| 286006 | C7orf53   | chromosome 7 open reading frame 53                                            |
| 3017   | HIST1H2BD | histone cluster 1, H2bd                                                       |

|        |           |                                                                                          |
|--------|-----------|------------------------------------------------------------------------------------------|
| 338651 | LOC338651 | uncharacterized LOC338651                                                                |
| 339977 | LRRC66    | leucine rich repeat containing 66                                                        |
| 340267 | COL28A1   | collagen, type XXVIII, alpha 1                                                           |
| 342931 | RFPL4A    | ret finger protein-like 4A                                                               |
| 343472 | BARHL2    | BarH-like homeobox 2                                                                     |
| 344148 | NCKAP5    | NCK-associated protein 5                                                                 |
| 345611 | IRGM      | immunity-related GTPase family, M                                                        |
| 376940 | ZC3H6     | zinc finger CCCH-type containing 6                                                       |
| 378938 | MALAT1    | metastasis associated lung adenocarcinoma transcript 1 (non-protein coding)              |
| 3791   | KDR       | kinase insert domain receptor (a type III receptor tyrosine kinase)                      |
| 387640 | C10orf140 | chromosome 10 open reading frame 140                                                     |
| 387758 | FIBIN     | fin bud initiation factor homolog (zebrafish)                                            |
| 389384 | C6orf222  | chromosome 6 open reading frame 222                                                      |
| 390245 | KDM4DL    | lysine (K)-specific demethylase 4D-like                                                  |
| 390999 | PRAMEF12  | PRAME family member 12                                                                   |
| 391002 | PRAMEF8   | PRAME family member 8                                                                    |
| 399726 | C10orf114 | chromosome 10 open reading frame 114                                                     |
| 399939 | LOC399939 | ring finger protein 18-like                                                              |
| 400456 | LOC400456 | uncharacterized LOC400456                                                                |
| 400617 | FLJ36644  | uncharacterized LOC400617                                                                |
| 401024 | FSIP2     | fibrous sheath interacting protein 2                                                     |
| 401093 | LOC401093 | uncharacterized LOC401093                                                                |
| 401190 | RGS7BP    | regulator of G-protein signaling 7 binding protein                                       |
| 401546 | C9orf152  | chromosome 9 open reading frame 152                                                      |
| 4133   | MAP2      | microtubule-associated protein 2                                                         |
| 4254   | KITLG     | KIT ligand                                                                               |
| 4330   | MN1       | meningioma (disrupted in balanced translocation) 1                                       |
| 440689 | HIST2H2BF | histone cluster 2, H2bf                                                                  |
| 441094 | FLJ42709  | uncharacterized LOC441094                                                                |
| 441307 | FLJ44511  | uncharacterized LOC441307                                                                |
| 441871 | PRAMEF7   | PRAME family member 7                                                                    |
| 442247 | RFPL4B    | ret finger protein-like 4B                                                               |
| 4640   | MYO1A     | myosin IA                                                                                |
| 4774   | NFIA      | nuclear factor I/A                                                                       |
| 4883   | NPR3      | natriuretic peptide receptor C/guanylate cyclase C (atrionatriuretic peptide receptor C) |
| 4919   | ROR1      | receptor tyrosine kinase-like orphan receptor 1                                          |
| 5087   | PBX1      | pre-B-cell leukemia homeobox 1                                                           |
| 51339  | DACT1     | dapper, antagonist of beta-catenin, homolog 1 (Xenopus laevis)                           |

|        |           |                                                                                 |
|--------|-----------|---------------------------------------------------------------------------------|
| 51513  | ETV7      | ets variant 7                                                                   |
| 53335  | BCL11A    | B-cell CLL/lymphoma 11A (zinc finger protein)                                   |
| 54055  | CYP4F29P  | cytochrome P450, family 4, subfamily F, polypeptide 29, pseudogene              |
| 54510  | PCDH18    | protocadherin 18                                                                |
| 55089  | SLC38A4   | solute carrier family 38, member 4                                              |
| 554313 | HIST2H4B  | histone cluster 2, H4b                                                          |
| 55534  | MAML3     | mastermind-like 3 (Drosophila)                                                  |
| 55567  | DNAH3     | dynein, axonemal, heavy chain 3                                                 |
| 55714  | ODZ3      | odz, odd Oz/ten-m homolog 3 (Drosophila)                                        |
| 55799  | CACNA2D3  | calcium channel, voltage-dependent, alpha 2/delta subunit 3                     |
| 56100  | PCDHGB6   | protocadherin gamma subfamily B, 6                                              |
| 56106  | PCDHGA10  | protocadherin gamma subfamily A, 10                                             |
| 56139  | PCDHA10   | protocadherin alpha 10                                                          |
| 57091  | CASS4     | Cas scaffolding protein family member 4                                         |
| 57093  | TRIM49    | tripartite motif containing 49                                                  |
| 57161  | PELI2     | pellino homolog 2 (Drosophila)                                                  |
| 57507  | ZNF608    | zinc finger protein 608                                                         |
| 57554  | LRRC7     | leucine rich repeat containing 7                                                |
| 57556  | SEMA6A    | sema domain, transmembrane domain (TM), and cytoplasmic domain, (semaphorin) 6A |
| 57561  | ARRDC3    | arrestin domain containing 3                                                    |
| 57568  | SIPA1L2   | signal-induced proliferation-associated 1 like 2                                |
| 57687  | VAT1L     | vesicle amine transport protein 1 homolog (T. californica)-like                 |
| 58480  | RHOU      | ras homolog gene family, member U                                               |
| 5915   | RARB      | retinoic acid receptor, beta                                                    |
| 5973   | RENBP     | renin binding protein                                                           |
| 64093  | SMOC1     | SPARC related modular calcium binding 1                                         |
| 642446 | TRIM64B   | tripartite motif containing 64B                                                 |
| 642612 | TRIM49L2  | tripartite motif containing 49-like 2                                           |
| 64288  | ZNF323    | zinc finger protein 323                                                         |
| 643180 | CCT6P3    | chaperonin containing TCP1, subunit 6 (zeta) pseudogene 3                       |
| 643401 | LOC643401 | uncharacterized LOC643401                                                       |
| 644192 | LOC644192 | uncharacterized LOC644192                                                       |
| 64800  | EFCAB6    | EF-hand calcium binding domain 6                                                |
| 653    | BMP5      | bone morphogenetic protein 5                                                    |
| 653192 | TRIM43B   | tripartite motif containing 43B                                                 |
| 6657   | SOX2      | SRY (sex determining region Y)-box 2                                            |
| 6659   | SOX4      | SRY (sex determining region Y)-box 4                                            |
| 6660   | SOX5      | SRY (sex determining region Y)-box 5                                            |

|        |            |                                                                            |
|--------|------------|----------------------------------------------------------------------------|
| 6664   | SOX11      | SRY (sex determining region Y)-box 11                                      |
| 7025   | NR2F1      | nuclear receptor subfamily 2, group F, member 1                            |
| 729384 | TRIM49L1   | tripartite motif containing 49-like 1                                      |
| 729974 | LOC729974  | ret finger protein-like 4A-like                                            |
| 7738   | ZNF184     | zinc finger protein 184                                                    |
| 79097  | TRIM48     | tripartite motif containing 48                                             |
| 79365  | BHLHE41    | basic helix-loop-helix family, member e41                                  |
| 79633  | FAT4       | FAT tumor suppressor homolog 4 (Drosophila)                                |
| 79667  | FLJ13197   | uncharacterized FLJ13197                                                   |
| 79718  | TBL1XR1    | transducin (beta)-like 1 X-linked receptor 1                               |
| 79819  | WDR78      | WD repeat domain 78                                                        |
| 79960  | PHF17      | PHD finger protein 17                                                      |
| 79992  | AGPAT4-IT1 | AGPAT4 intronic transcript 1 (non-protein coding)                          |
| 80319  | CXXC4      | CXXC finger protein 4                                                      |
| 80345  | ZSCAN16    | zinc finger and SCAN domain containing 16                                  |
| 80726  | KIAA1683   | KIAA1683                                                                   |
| 80816  | ASXL3      | additional sex combs like 3 (Drosophila)                                   |
| 81575  | APOLD1     | apolipoprotein L domain containing 1                                       |
| 8334   | HIST1H2AC  | histone cluster 1, H2ac                                                    |
| 8339   | HIST1H2BG  | histone cluster 1, H2bg                                                    |
| 8341   | HIST1H2BN  | histone cluster 1, H2bn                                                    |
| 8344   | HIST1H2BE  | histone cluster 1, H2be                                                    |
| 8347   | HIST1H2BC  | histone cluster 1, H2bc                                                    |
| 83478  | ARHGAP24   | Rho GTPase activating protein 24                                           |
| 8365   | HIST1H4H   | histone cluster 1, H4h                                                     |
| 8367   | HIST1H4E   | histone cluster 1, H4e                                                     |
| 8370   | HIST2H4A   | histone cluster 2, H4a                                                     |
| 83992  | CTTNBP2    | cortactin binding protein 2                                                |
| 84206  | MEX3B      | mex-3 homolog B (C. elegans)                                               |
| 8462   | KLF11      | Kruppel-like factor 11                                                     |
| 84665  | MYPN       | myopalladin                                                                |
| 84858  | ZNF503     | zinc finger protein 503                                                    |
| 84989  | LOC84989   | uncharacterized LOC84989                                                   |
| 860    | RUNX2      | runt-related transcription factor 2                                        |
| 862    | RUNX1T1    | runt-related transcription factor 1; translocated to, 1 (cyclin D-related) |
| 8632   | DNAH17     | dynein, axonemal, heavy chain 17                                           |
| 8739   | HRK        | harakiri, BCL2 interacting protein (contains only BH3 domain)              |
| 8863   | PER3       | period homolog 3 (Drosophila)                                              |



|       |           |                                                 |
|-------|-----------|-------------------------------------------------|
| 8969  | HIST1H2AG | histone cluster 1, H2ag                         |
| 8970  | HIST1H2BJ | histone cluster 1, H2bj                         |
| 92344 | GORAB     | golgin, RAB6-interacting                        |
| 9315  | C5orf13   | chromosome 5 open reading frame 13              |
| 93166 | PRDM6     | PR domain containing 6                          |
| 93986 | FOXP2     | forkhead box P2                                 |
| 9515  | STXBP5L   | syntaxin binding protein 5-like                 |
| 9572  | NR1D1     | nuclear receptor subfamily 1, group D, member 1 |
| 9839  | ZEB2      | zinc finger E-box binding homeobox 2            |

HALLMARK\_P5: HALLMARK\_TN HALLMARK\_ES1 HALLMARK\_KR, HALLMARK\_AN HALLMARK\_MYOGENESIS  
SITION  
POXIA

HALLMARK\_KRAS\_SIGNALING\_UP

HALLMARK\_MYOGENESIS

HALLMARK\_MYOGENESIS

HALLMARK\_P53: HALLMARK\_TNFA\_SIGNALING\_VIA\_NFKB

HALLMARK\_P53: HALLMARK\_TNFA\_SIGNALING\_VIA\_NFKB

SITION HALLMARK\_TNFA\_SIGNALING\_ HALLMARK\_KRAS\_SIGNALING\_UP

SITION HALLMARK\_TNFA\_SIGNALING\_VIA\_NFKB

SITION HALLMARK\_ESTROGEN\_RESPONSE\_LATE

SITION

SITION

SITION

SITION

POXIA

POXIA

HALLMARK\_P53: HALLMARK\_TNFA\_SIGNALING\_VIA\_NFKB

POXIA

POXIA

POXIA

POXIA

HALLMARK\_MYOGENESIS

HALLMARK\_P53: HALLMARK\_TNFA\_SIGNALING\_VIA\_NFKB

HALLMARK\_P53\_PATHWAY

HALLMARK\_P53\_PATHWAY

HALLMARK\_P53\_PATHWAY

HALLMARK\_P53\_PATHWAY

HALLMARK\_P53\_PATHWAY

HALLMARK\_TNFA\_SIGNALING\_VIA\_NFKB HALLMARK\_ANDROGEN\_RESPONSE

HALLMARK\_TNFA\_SIGNALING\_VIA\_NFKB

HALLMARK\_TNFA\_SIGNALING\_VIA\_NFKB

HALLMARK\_ESTROGEN\_RESPONSE\_LATE

HALLMARK\_ESTROGEN\_RESPONSE\_LATE

HALLMARK\_ESTROGEN\_RESPONSE\_LATE

HALLMARK\_ESTROGEN\_RESPONSE\_LATE

HALLMARK\_ESTROGEN\_RESPONSE\_LATE

HALLMARK\_KRAS\_SIGNALING\_UP

HALLMARK\_KRAS\_SIGNALING\_UP

HALLMARK\_KRAS\_SIGNALING\_UP

HALLMARK\_KRAS\_SIGNALING\_UP

HALLMARK\_ANDROGEN\_RESPONSE

HALLMARK\_ANDROGEN\_RESPONSE

HALLMARK\_ANDROGEN\_RESPONSE

HALLMARK\_MYOGENESIS

HALLMARK\_MYOGENESIS
