# Supplementary material for: Chromosome 19 microRNA cluster enhances cell reprogramming by inhibiting epithelial-to-mesenchymal transition
Source: PubMed Central journal article supplement (PMC7033247; doi:10.1038/s41598-020-59812-8), 2020-02-20
Supplement: 41598_2020_59812_MOESM4_ESM.pdf [file 41598_2020_59812_MOESM4_ESM.pdf]

**Sheet "miRNAs Hypoxia-Normoxia":** small miRNA sequencing data analysis of miRNAs differentially expressed in iPSCs cultured in hypoxia compared to normoxia.

**Sheet "Cistrons Hypoxia-Normoxia":** small miRNA sequencing data analysis of miRNA cistrons differentially expressed in iPSCs cultured in hypoxia compared to normoxia.

| miRNA      | Normalized frequency (%) |          | Linear fold chan | P value     | FDR         |
|------------|--------------------------|----------|------------------|-------------|-------------|
|            | Hypoxia                  | Normoxia |                  |             |             |
| 210(1)     | 0.004146                 | 0.000298 | 13.9             | 4.19569E-09 | 2.45867E-06 |
| 9STAR(3)   | 0.000173                 | 0.000029 | 5.9              | 0.001021447 | 0.099761302 |
| 598(1)     | 0.000326                 | 0.000104 | 3.1              | 0.001931411 | 0.141475871 |
| 9(3)       | 0.003652                 | 0.001202 | 3                | 0.000457373 | 0.072964065 |
| 503(1)     | 0.000532                 | 0.000191 | 2.8              | 0.000396417 | 0.072964065 |
| 21STAR(1)  | 0.000622                 | 0.000219 | 2.8              | 0.000814109 | 0.095413552 |
| 30d(1)     | 0.006211                 | 0.003261 | 1.9              | 0.002748052 | 0.178928731 |
| 498(1)     | 0.000073                 | 0.000219 | -3               | 0.001257955 | 0.105308777 |
| 518c-3p(1) | 0.000048                 | 0.000194 | -4               | 0.000498048 | 0.072964065 |

| miRNA cistron | Normalized frequency (%) |          | Linear fold chan | P value     | FDR         |
|---------------|--------------------------|----------|------------------|-------------|-------------|
|               | Hypoxia                  | Normoxia |                  |             |             |
| 210(1)        | 0.412455                 | 0.029741 | 13.9             | 4.96E-11    | 1.33956E-08 |
| 489(2)        | 0.012991                 | 0.003859 | 3.4              | 0.004330817 | 0.167045789 |
| 9-1(3)        | 0.381634                 | 0.123784 | 3.1              | 0.000201806 | 0.013621888 |
| 424(2)        | 0.108522                 | 0.036140 | 3                | 6.03454E-05 | 0.008146628 |
| 598(1)        | 0.033100                 | 0.010923 | 3                | 0.00191234  | 0.103266344 |
| 30b(2)        | 0.683601                 | 0.385398 | 1.8              | 0.002823007 | 0.127035326 |
| 498(46)       | 0.342795                 | 0.653611 | -1.9             | 0.000119826 | 0.010784374 |
