# Supplementary material for: Chromosome 19 microRNA cluster enhances cell reprogramming by inhibiting epithelial-to-mesenchymal transition
Source: PubMed Central journal article supplement (PMC7033247; doi:10.1038/s41598-020-59812-8), 2020-02-20
Supplement: 41598_2020_59812_MOESM5_ESM.pdf [file 41598_2020_59812_MOESM5_ESM.pdf]

**Sheet "mRNAs Hypoxia-Normoxia "**: RNA sequencing data analysis of differentially expressed mRNAs in iPSC cultured in hypoxia for 24 h compared to normoxia control.

**Sheet "GSEA upregulated genes "**: Gene set expression analysis of significantly upregulated mRNAs in iPSCs cultured in cultured in hypoxia for 24 h compared to normoxia control.





1  
2  
3  
4  
5  
6  
7  
8  
9  
10  
11  
12  
13  
14  
15  
16  
17  
18  
19  
20  
21  
22  
23  
24  
25  
26  
27  
28  
29  
30  
31  
32  
33  
34  
35  
36  
37  
38  
39  
40  
41  
42  
43  
44  
45  
46  
47  
48  
49  
50  
51  
52  
53  
54  
55  
56  
57  
58  
59  
60  
61  
62  
63  
64  
65  
66  
67  
68  
69  
70  
71  
72  
73  
74  
75  
76  
77  
78  
79  
80  
81  
82  
83  
84  
85  
86  
87  
88  
89  
90  
91  
92  
93  
94  
95  
96  
97  
98  
99  
100  
101  
102  
103  
104  
105  
106  
107  
108  
109  
110  
111  
112  
113  
114  
115  
116  
117  
118  
119  
120  
121  
122  
123  
124  
125  
126  
127  
128  
129  
130  
131  
132  
133  
134  
135  
136  
137  
138  
139  
140  
141  
142  
143  
144  
145  
146  
147  
148  
149  
150  
151  
152  
153  
154  
155  
156  
157  
158  
159  
160  
161  
162  
163  
164  
165  
166  
167  
168  
169  
170  
171  
172  
173  
174  
175  
176  
177  
178  
179  
180  
181  
182  
183  
184  
185  
186  
187  
188  
189  
190  
191  
192  
193  
194  
195  
196  
197  
198  
199  
200  
201  
202  
203  
204  
205  
206  
207  
208  
209  
210  
211  
212  
213  
214  
215  
216  
217  
218  
219  
220  
221  
222  
223  
224  
225  
226  
227  
228  
229  
230  
231  
232  
233  
234  
235  
236  
237  
238  
239  
240  
241  
242  
243  
244  
245  
246  
247  
248  
249  
250  
251  
252  
253  
254  
255  
256  
257  
258  
259  
260  
261  
262  
263  
264  
265  
266  
267  
268  
269  
270  
271  
272  
273  
274  
275  
276  
277  
278  
279  
280  
281  
282  
283  
284  
285  
286  
287  
288  
289  
290  
291  
292  
293  
294  
295  
296  
297  
298  
299  
300  
301  
302  
303  
304  
305  
306  
307  
308  
309  
310  
311  
312  
313  
314  
315  
316  
317  
318  
319  
320  
321  
322  
323  
324  
325  
326  
327  
328  
329  
330  
331  
332  
333  
334  
335  
336  
337  
338  
339  
340  
341  
342  
343  
344  
345  
346  
347  
348  
349  
350  
351  
352  
353  
354  
355  
356  
357  
358  
359  
360  
361  
362  
363  
364  
365  
366  
367  
368  
369  
370  
371  
372  
373  
374  
375  
376  
377  
378  
379  
380  
381  
382  
383  
384  
385  
386  
387  
388  
389  
390  
391  
392  
393  
394  
395  
396  
397  
398  
399  
400  
401  
402  
403  
404  
405  
406  
407  
408  
409  
410  
411  
412  
413  
414  
415  
416  
417  
418  
419  
420  
421  
422  
423  
424  
425  
426  
427  
428  
429  
430  
431  
432  
433  
434  
435  
436  
437  
438  
439  
440  
441  
442  
443  
444  
445  
446  
447  
448  
449  
450  
451  
452  
453  
454  
455  
456  
457  
458  
459  
460  
461  
462  
463  
464  
465  
466  
467  
468  
469  
470  
471  
472  
473  
474  
475  
476  
477  
478  
479  
480  
481  
482  
483  
484  
485  
486  
487  
488  
489  
490  
491  
492  
493  
494  
495  
496  
497  
498  
499  
500  
501  
502  
503  
504  
505  
506  
507  
508  
509  
510  
511  
512  
513  
514  
515  
516  
517  
518  
519  
520  
521  
522  
523  
524  
525  
526  
527  
528  
529  
530  
531  
532  
533  
534  
535  
536  
537  
538  
539  
540  
541  
542  
543  
544  
545  
546  
547  
548  
549  
550  
551  
552  
553  
554  
555  
556  
557  
558  
559  
560  
561  
562  
563  
564  
565  
566  
567  
568  
569  
570  
571  
572  
573  
574  
575  
576  
577  
578  
579  
580  
581  
582  
583  
584  
585  
586  
587  
588  
589  
590  
591  
592  
593  
594  
595  
596  
597  
598  
599  
600  
601  
602  
603  
604  
605  
606  
607  
608  
609  
610  
611  
612  
613  
614  
615  
616  
617  
618  
619  
620  
621  
622  
623  
624  
625  
626  
627  
628  
629  
630  
631  
632  
633  
634  
635  
636  
637  
638  
639  
640  
641  
642  
643  
644  
645  
646  
647  
648  
649  
650  
651  
652  
653  
654  
655  
656  
657  
658  
659  
660  
661  
662  
663  
664  
665  
666  
667  
668  
669  
670  
671  
672  
673  
674  
675  
676  
677  
678  
679  
680  
681  
682  
683  
684  
685  
686  
687  
688  
689  
690  
691  
692  
693  
694  
695  
696  
697  
698  
699  
700  
701  
702  
703  
704  
705  
706  
707  
708  
709  
710  
711  
712  
713  
714  
715  
716  
717  
718  
719  
720  
721  
722  
723  
724  
725  
726  
727  
728  
729  
730  
731  
732  
733  
734  
735  
736  
737  
738  
739  
740  
741  
742  
743  
744  
745  
746  
747  
748  
749  
750  
751  
752  
753  
754  
755  
756  
757  
758  
759  
760  
761  
762  
763  
764  
765  
766  
767  
768  
769  
770  
771  
772  
773  
774  
775  
776  
777  
778  
779  
780  
781  
782  
783  
784  
785  
786  
787  
788  
789  
790  
791  
792  
793  
794  
795  
796  
797  
798  
799  
800  
801  
802  
803  
804  
805  
806  
807  
808  
809  
810  
811  
812  
813  
814  
815  
816  
817  
818  
819  
820  
821  
822  
823  
824  
825  
826  
827  
828  
829  
830  
831  
832  
833  
834  
835  
836  
837  
838  
839  
840  
841  
842  
843  
844  
845  
846  
847  
848  
849  
850  
851  
852  
853  
854  
855  
856  
857  
858  
859  
860  
861  
862  
863  
864  
865  
866  
867  
868  
869  
870  
871  
872  
873  
874  
875  
876  
877  
878  
879  
880  
881  
882  
883  
884  
885  
886  
887  
888  
889  
890  
891  
892  
893  
894  
895  
896  
897  
898  
899  
900  
901  
902  
903  
904  
905  
906  
907  
908  
909  
910  
911  
912  
913  
914  
915  
916  
917  
918  
919  
920  
921  
922  
923  
924  
925  
926  
927  
928  
929  
930  
931  
932  
933  
934  
935  
936  
937  
938  
939  
940  
941  
942  
943  
944  
945  
946  
947  
948  
949  
950  
951  
952  
953  
954  
955  
956  
957  
958  
959  
960  
961  
962  
963  
964  
965  
966  
967  
968  
969  
970  
971  
972  
973  
974  
975  
976  
977  
978  
979  
980  
981  
982  
983  
984  
985  
986  
987  
988  
989  
990  
991  
992  
993  
994  
995  
996  
997  
998  
999  
1000



Illegible text, possibly a barcode or a very faint scan of a document page.







1  
2  
3  
4  
5  
6  
7  
8  
9  
10  
11  
12  
13  
14  
15  
16  
17  
18  
19  
20  
21  
22  
23  
24  
25  
26  
27  
28  
29  
30  
31  
32  
33  
34  
35  
36  
37  
38  
39  
40  
41  
42  
43  
44  
45  
46  
47  
48  
49  
50  
51  
52  
53  
54  
55  
56  
57  
58  
59  
60  
61  
62  
63  
64  
65  
66  
67  
68  
69  
70  
71  
72  
73  
74  
75  
76  
77  
78  
79  
80  
81  
82  
83  
84  
85  
86  
87  
88  
89  
90  
91  
92  
93  
94  
95  
96  
97  
98  
99  
100  
101  
102  
103  
104  
105  
106  
107  
108  
109  
110  
111  
112  
113  
114  
115  
116  
117  
118  
119  
120  
121  
122  
123  
124  
125  
126  
127  
128  
129  
130  
131  
132  
133  
134  
135  
136  
137  
138  
139  
140  
141  
142  
143  
144  
145  
146  
147  
148  
149  
150  
151  
152  
153  
154  
155  
156  
157  
158  
159  
160  
161  
162  
163  
164  
165  
166  
167  
168  
169  
170  
171  
172  
173  
174  
175  
176  
177  
178  
179  
180  
181  
182  
183  
184  
185  
186  
187  
188  
189  
190  
191  
192  
193  
194  
195  
196  
197  
198  
199  
200  
201  
202  
203  
204  
205  
206  
207  
208  
209  
210  
211  
212  
213  
214  
215  
216  
217  
218  
219  
220  
221  
222  
223  
224  
225  
226  
227  
228  
229  
230  
231  
232  
233  
234  
235  
236  
237  
238  
239  
240  
241  
242  
243  
244  
245  
246  
247  
248  
249  
250  
251  
252  
253  
254  
255  
256  
257  
258  
259  
260  
261  
262  
263  
264  
265  
266  
267  
268  
269  
270  
271  
272  
273  
274  
275  
276  
277  
278  
279  
280  
281  
282  
283  
284  
285  
286  
287  
288  
289  
290  
291  
292  
293  
294  
295  
296  
297  
298  
299  
300  
301  
302  
303  
304  
305  
306  
307  
308  
309  
310  
311  
312  
313  
314  
315  
316  
317  
318  
319  
320  
321  
322  
323  
324  
325  
326  
327  
328  
329  
330  
331  
332  
333  
334  
335  
336  
337  
338  
339  
340  
341  
342  
343  
344  
345  
346  
347  
348  
349  
350  
351  
352  
353  
354  
355  
356  
357  
358  
359  
360  
361  
362  
363  
364  
365  
366  
367  
368  
369  
370  
371  
372  
373  
374  
375  
376  
377  
378  
379  
380  
381  
382  
383  
384  
385  
386  
387  
388  
389  
390  
391  
392  
393  
394  
395  
396  
397  
398  
399  
400  
401  
402  
403  
404  
405  
406  
407  
408  
409  
410  
411  
412  
413  
414  
415  
416  
417  
418  
419  
420  
421  
422  
423  
424  
425  
426  
427  
428  
429  
430  
431  
432  
433  
434  
435  
436  
437  
438  
439  
440  
441  
442  
443  
444  
445  
446  
447  
448  
449  
450  
451  
452  
453  
454  
455  
456  
457  
458  
459  
460  
461  
462  
463  
464  
465  
466  
467  
468  
469  
470  
471  
472  
473  
474  
475  
476  
477  
478  
479  
480  
481  
482  
483  
484  
485  
486  
487  
488  
489  
490  
491  
492  
493  
494  
495  
496  
497  
498  
499  
500  
501  
502  
503  
504  
505  
506  
507  
508  
509  
510  
511  
512  
513  
514  
515  
516  
517  
518  
519  
520  
521  
522  
523  
524  
525  
526  
527  
528  
529  
530  
531  
532  
533  
534  
535  
536  
537  
538  
539  
540  
541  
542  
543  
544  
545  
546  
547  
548  
549  
550  
551  
552  
553  
554  
555  
556  
557  
558  
559  
560  
561  
562  
563  
564  
565  
566  
567  
568  
569  
570  
571  
572  
573  
574  
575  
576  
577  
578  
579  
580  
581  
582  
583  
584  
585  
586  
587  
588  
589  
590  
591  
592  
593  
594  
595  
596  
597  
598  
599  
600  
601  
602  
603  
604  
605  
606  
607  
608  
609  
610  
611  
612  
613  
614  
615  
616  
617  
618  
619  
620  
621  
622  
623  
624  
625  
626  
627  
628  
629  
630  
631  
632  
633  
634  
635  
636  
637  
638  
639  
640  
641  
642  
643  
644  
645  
646  
647  
648  
649  
650  
651  
652  
653  
654  
655  
656  
657  
658  
659  
660  
661  
662  
663  
664  
665  
666  
667  
668  
669  
670  
671  
672  
673  
674  
675  
676  
677  
678  
679  
680  
681  
682  
683  
684  
685  
686  
687  
688  
689  
690  
691  
692  
693  
694  
695  
696  
697  
698  
699  
700  
701  
702  
703  
704  
705  
706  
707  
708  
709  
710  
711  
712  
713  
714  
715  
716  
717  
718  
719  
720  
721  
722  
723  
724  
725  
726  
727  
728  
729  
730  
731  
732  
733  
734  
735  
736  
737  
738  
739  
740  
741  
742  
743  
744  
745  
746  
747  
748  
749  
750  
751  
752  
753  
754  
755  
756  
757  
758  
759  
760  
761  
762  
763  
764  
765  
766  
767  
768  
769  
770  
771  
772  
773  
774  
775  
776  
777  
778  
779  
780  
781  
782  
783  
784  
785  
786  
787  
788  
789  
790  
791  
792  
793  
794  
795  
796  
797  
798  
799  
800  
801  
802  
803  
804  
805  
806  
807  
808  
809  
810  
811  
812  
813  
814  
815  
816  
817  
818  
819  
820  
821  
822  
823  
824  
825  
826  
827  
828  
829  
830  
831  
832  
833  
834  
835  
836  
837  
838  
839  
840  
841  
842  
843  
844  
845  
846  
847  
848  
849  
850  
851  
852  
853  
854  
855  
856  
857  
858  
859  
860  
861  
862  
863  
864  
865  
866  
867  
868  
869  
870  
871  
872  
873  
874  
875  
876  
877  
878  
879  
880  
881  
882  
883  
884  
885  
886  
887  
888  
889  
890  
891  
892  
893  
894  
895  
896  
897  
898  
899  
900  
901  
902  
903  
904  
905  
906  
907  
908  
909  
910  
911  
912  
913  
914  
915  
916  
917  
918  
919  
920  
921  
922  
923  
924  
925  
926  
927  
928  
929  
930  
931  
932  
933  
934  
935  
936  
937  
938  
939  
940  
941  
942  
943  
944  
945  
946  
947  
948  
949  
950  
951  
952  
953  
954  
955  
956  
957  
958  
959  
960  
961  
962  
963  
964  
965  
966  
967  
968  
969  
970  
971  
972  
973  
974  
975  
976  
977  
978  
979  
980  
981  
982  
983  
984  
985  
986  
987  
988  
989  
990  
991  
992  
993  
994  
995  
996  
997  
998  
999  
1000



































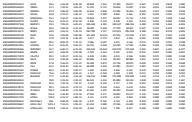

## Overlap Results

|                            |       |
|----------------------------|-------|
| Collection(s):             | H     |
| # overlaps shown:          | 10    |
| # genesets in collections: | 50    |
| # genes in comparison (n): | 1704  |
| # genes in universe (N):   | 45956 |

| Gene Set Name                             | # Genes in G | Description    | # Genes in Overlap | k/K    |
|-------------------------------------------|--------------|----------------|--------------------|--------|
| HALLMARK_HYPOXIA                          | 200          | Genes up-regul | 102                | 0.51   |
| HALLMARK_TNFA_SIGNALING_VIA_NFKB          | 200          | Genes regulate | 81                 | 0.405  |
| HALLMARK_MTORC1_SIGNALING                 | 200          | Genes up-regul | 64                 | 0.32   |
| HALLMARK_CHOLESTEROL_HOMEOSTASIS          | 74           | Genes involved | 41                 | 0.5541 |
| HALLMARK_EPITHELIAL_MESENCHYMAL_TRANSITIC | 200          | Genes defining | 56                 | 0.28   |
| HALLMARK_GLYCOLYSIS                       | 200          | Genes encoding | 54                 | 0.27   |
| HALLMARK_P53_PATHWAY                      | 200          | Genes involved | 53                 | 0.265  |
| HALLMARK_MYOGENESIS                       | 200          | Genes involved | 43                 | 0.215  |
| HALLMARK_APOPTOSIS                        | 161          | Genes mediatir | 38                 | 0.236  |
| HALLMARK_ESTROGEN_RESPONSE_EARLY          | 200          | Genes defining | 42                 | 0.21   |

## Gene/Gene Set Overlap Matrix

| Entrez Gene Id | Gene Symbol | Gene Description           | HALLMARK_HY      | HALLMARK_TN  |
|----------------|-------------|----------------------------|------------------|--------------|
| 4783           | NFIL3       | nuclear factor, $\kappa$ B | HALLMARK_HY      | HALLMARK_TN  |
| 1026           | CDKN1A      | cyclin-depende             | HALLMARK_HY      | HALLMARK_TN  |
| 23645          | PPP1R15A    | protein phosph             | HALLMARK_HY      | HALLMARK_TN  |
| 8553           | BHLHE40     | basic helix-loop           | HALLMARK_HY      | HALLMARK_TN  |
| 6515           | SLC2A3      | solute carrier f           | HALLMARK_HY      | HALLMARK_TN  |
| 467            | ATF3        | activating trans           | HALLMARK_HY      | HALLMARK_TNI |
| 10957          | PNRC1       | proline-rich nuc           | HALLMARK_HY      | HALLMARK_TNI |
| 7422           | VEGFA       | vascular endotf            | HALLMARK_HY      | HALLMARK_TNI |
| 3725           | JUN         | jun proto-oncof            | HALLMARK_HY      | HALLMARK_TNI |
| 5054           | SERPINE1    | serpin peptidas            | HALLMARK_HY      | HALLMARK_TNI |
| 3491           | CYR61       | cysteine-rich, a           | HALLMARK_HY      | HALLMARK_TNI |
| 7128           | TNFAIP3     | tumor necrosis             | HALLMARK_HY      | HALLMARK_TNI |
| 8870           | IER3        | immediate earl             | HALLMARK_HY      | HALLMARK_TNI |
| 2353           | FOS         | FBJ murine oste            | HALLMARK_HY      | HALLMARK_TNI |
| 694            | BTG1        | B-cell transloca           | HALLMARK_HY      | HALLMARK_TNI |
| 25976          | TIPARP      | TCDD-inducible             | HALLMARK_HY      | HALLMARK_TNI |
| 1843           | DUSP1       | dual specificity           | HALLMARK_HY      | HALLMARK_TNI |
| 1316           | KLF6        | Kruppel-like fac           | HALLMARK_HY      | HALLMARK_TNI |
| 23764          | MAFF        | v-maf musculo              | HALLMARK_HY      | HALLMARK_TNI |
| 7538           | ZFP36       | zinc finger prot           | HALLMARK_HY      | HALLMARK_TNI |
| 5209           | PFKFB3      | 6-phosphofruct             | HALLMARK_HY      | HALLMARK_TNI |
| 1942           | EFNA1       | ephrin-A1                  | HALLMARK_HY      | HALLMARK_TNI |
| 2355           | FOSL2       | FOS-like antigen           | HALLMARK_HY      | HALLMARK_TNI |
| 57007          | CXCR7       | chemokine (C-X)            | HALLMARK_HY      | HALLMARK_TNI |
| 54541          | DDIT4       | DNA-damage-ir              | HALLMARK_HYPOXIA |              |
| 7436           | VLDLR       | very low densit            | HALLMARK_HYPOXIA |              |
| 3099           | HK2         | hexokinase 2               | HALLMARK_HYPOXIA |              |
| 5033           | P4HA1       | prolyl 4-hydrox            | HALLMARK_HYPOXIA |              |

|       |         |                       |                  |
|-------|---------|-----------------------|------------------|
| 30001 | ERO1L   | ERO1-like (S. ce      | HALLMARK_HYPOXIA |
| 7852  | CXCR4   | chemokine (C-x        | HALLMARK_HYPOXIA |
| 226   | ALDOA   | aldolase A, fruc      | HALLMARK_HYPOXIA |
| 3939  | LDHA    | lactate dehydr        | HALLMARK_HYPOXIA |
| 6781  | STC1    | stanniocalcin 1       | HALLMARK_HYPOXIA |
| 5230  | PGK1    | phosphoglycer         | HALLMARK_HYPOXIA |
| 2023  | ENO1    | enolase 1, (alp       | HALLMARK_HYPOXIA |
| 7167  | TPI1    | triosephosphat        | HALLMARK_HYPOXIA |
| 1649  | DDIT3   | DNA-damage-ir         | HALLMARK_HYPOXIA |
| 6513  | SLC2A1  | solute carrier f      | HALLMARK_HYPOXIA |
| 2632  | GBE1    | glucan (1,4- $\alpha$ | HALLMARK_HYPOXIA |
| 5211  | PFKL    | phosphofructo         | HALLMARK_HYPOXIA |
| 5236  | PGM1    | phosphoglucon         | HALLMARK_HYPOXIA |
| 5163  | PDK1    | pyruvate dehyd        | HALLMARK_HYPOXIA |
| 2821  | GPI     | glucose-6-phos        | HALLMARK_HYPOXIA |
| 2597  | GAPDH   | glyceraldehyde        | HALLMARK_HYPOXIA |
| 26136 | TES     | testis derived t      | HALLMARK_HYPOXIA |
| 5165  | PDK3    | pyruvate dehyd        | HALLMARK_HYPOXIA |
| 230   | ALDOC   | aldolase C, fruc      | HALLMARK_HYPOXIA |
| 54206 | ERRF1   | ERBB receptor i       | HALLMARK_HYPOXIA |
| 2026  | ENO2    | enolase 2 (gam        | HALLMARK_HYPOXIA |
| 7045  | TGFBI   | transforming gr       | HALLMARK_HYPOXIA |
| 1490  | CTGF    | connective tiss       | HALLMARK_HYPOXIA |
| 4015  | LOX     | lysyl oxidase         | HALLMARK_HYPOXIA |
| 26355 | FAM162A | family with seq       | HALLMARK_HYPOXIA |
| 8614  | STC2    | stanniocalcin 2       | HALLMARK_HYPOXIA |
| 8497  | PPFIA4  | protein tyrosin       | HALLMARK_HYPOXIA |
| 3669  | ISG20   | interferon stim       | HALLMARK_HYPOXIA |
| 136   | ADORA2B | adenosine A2b         | HALLMARK_HYPOXIA |
| 10370 | CITED2  | Cbp/p300-inter        | HALLMARK_HYPOXIA |
| 51129 | ANGPTL4 | angiopoietin-lik      | HALLMARK_HYPOXIA |
| 4601  | MXI1    | MAX interactor        | HALLMARK_HYPOXIA |
| 8974  | P4HA2   | prolyl 4-hydrox       | HALLMARK_HYPOXIA |
| 4282  | MIF     | macrophage mi         | HALLMARK_HYPOXIA |
| 5214  | PFKP    | phosphofructo         | HALLMARK_HYPOXIA |
| 8819  | SAP30   | Sin3A-associate       | HALLMARK_HYPOXIA |
| 5066  | PAM     | peptidylglycine       | HALLMARK_HYPOXIA |
| 10570 | DPYSL4  | dihydropyrimid        | HALLMARK_HYPOXIA |
| 1944  | EFNA3   | ephrin-A3             | HALLMARK_HYPOXIA |
| 2131  | EXT1    | exostosin 1           | HALLMARK_HYPOXIA |
| 23036 | ZNF292  | zinc finger prot      | HALLMARK_HYPOXIA |
| 55139 | ANKZF1  | ankyrin repeat        | HALLMARK_HYPOXIA |
| 55276 | PGM2    | phosphoglucon         | HALLMARK_HYPOXIA |
| 10397 | NDRG1   | N-myc downstr         | HALLMARK_HYPOXIA |
| 2309  | FOXO3   | forkhead box O        | HALLMARK_HYPOXIA |
| 4627  | MYH9    | myosin, heavy         | HALLMARK_HYPOXIA |
| 1837  | DTNA    | dystrobrevin, al      | HALLMARK_HYPOXIA |
| 5507  | PPP1R3C | protein phosph        | HALLMARK_HYPOXIA |
| 5837  | PYGM    | phosphorylase,        | HALLMARK_HYPOXIA |
| 857   | CAV1    | caveolin 1, cav       | HALLMARK_HYPOXIA |
| 665   | BNIP3L  | BCL2/adenovir         | HALLMARK_HYPOXIA |
| 6478  | SIAH2   | seven in absent       | HALLMARK_HYPOXIA |

|        |         |                                    |                  |
|--------|---------|------------------------------------|------------------|
| 302    | ANXA2   | annexin A2                         | HALLMARK_HYPOXIA |
| 6095   | RORA    | RAR-related or                     | HALLMARK_HYPOXIA |
| 133    | ADM     | adrenomedullin                     | HALLMARK_HYPOXIA |
| 7163   | TPD52   | tumor protein 1                    | HALLMARK_HYPOXIA |
| 4214   | MAP3K1  | mitogen-activa                     | HALLMARK_HYPOXIA |
| 284119 | PTRF    | polymerase I ar                    | HALLMARK_HYPOXIA |
| 6576   | SLC25A1 | solute carrier f                   | HALLMARK_HYPOXIA |
| 901    | CCNG2   | cyclin G2                          | HALLMARK_HYPOXIA |
| 5155   | PDGFB   | platelet-deriv                     | HALLMARK_HYPOXIA |
| 7511   | XPNPEP1 | X-prolyl amino                     | HALLMARK_HYPOXIA |
| 8609   | KLF7    | Kruppel-like fac                   | HALLMARK_HYPOXIA |
| 1466   | CSRP2   | cysteine and gl                    | HALLMARK_HYPOXIA |
| 23210  | JMJD6   | jumonji domai                      | HALLMARK_HYPOXIA |
| 23327  | NEDD4L  | neural precurs                     | HALLMARK_HYPOXIA |
| 25819  | CCRN4L  | CCR4 carbon ca                     | HALLMARK_HYPOXIA |
| 26118  | WSB1    | WD repeat and                      | HALLMARK_HYPOXIA |
| 3423   | IDS     | iduronate 2-sul                    | HALLMARK_HYPOXIA |
| 54800  | KLHL24  | kelch-like 24 (D                   | HALLMARK_HYPOXIA |
| 55076  | TMEM45A | transmembran                       | HALLMARK_HYPOXIA |
| 55818  | KDM3A   | lysine (K)-speci                   | HALLMARK_HYPOXIA |
| 63827  | BCAN    | brevican                           | HALLMARK_HYPOXIA |
| 8987   | STBD1   | starch binding                     | HALLMARK_HYPOXIA |
| 3949   | LDLR    | low density lipoprotein receptor   | HALLMARK_TN      |
| 7832   | BTG2    | BTG family, member 2               | HALLMARK_TN      |
| 10135  | NAMPT   | nicotinamide phosphoribosyltr      | HALLMARK_TN      |
| 182    | JAG1    | jagged 1                           | HALLMARK_TNI     |
| 960    | CD44    | CD44 molecule (Indian blood gr     | HALLMARK_TNI     |
| 1647   | GADD45A | growth arrest and DNA-damag        | HALLMARK_TNI     |
| 4616   | GADD45B | growth arrest and DNA-damag        | HALLMARK_TNI     |
| 388    | RHOB    | ras homolog gene family, mem       | HALLMARK_TNI     |
| 3624   | INHBA   | inhibin, beta A                    | HALLMARK_TNI     |
| 3398   | ID2     | inhibitor of DNA binding 2, dor    | HALLMARK_TNI     |
| 2669   | GEM     | GTP binding protein overexpres     | HALLMARK_TNI     |
| 3371   | TNC     | tenascin C                         | HALLMARK_TNI     |
| 5806   | PTX3    | pentraxin 3, long                  | HALLMARK_TNI     |
| 1839   | HBEGF   | heparin-binding EGF-like growt     | HALLMARK_TNI     |
| 8877   | SPHK1   | sphingosine kinase 1               | HALLMARK_TNI     |
| 650    | BMP2    | bone morphogenetic protein 2       | HALLMARK_TNI     |
| 3552   | IL1A    | interleukin 1, alpha               | HALLMARK_TNI     |
| 9314   | KLF4    | Kruppel-like factor 4 (gut)        | HALLMARK_TNI     |
| 3976   | LIF     | leukemia inhibitory factor (chol   | HALLMARK_TNI     |
| 4084   | MXD1    | MAX dimerization protein 1         | HALLMARK_TNI     |
| 5791   | PTPRE   | protein tyrosine phosphatase, r    | HALLMARK_TNI     |
| 10769  | PLK2    | polo-like kinase 2                 | HALLMARK_TNI     |
| 51278  | IER5    | immediate early response 5         | HALLMARK_TNI     |
| 1960   | EGR3    | early growth response 3            | HALLMARK_TNI     |
| 4170   | MCL1    | myeloid cell leukemia sequenc      | HALLMARK_TNI     |
| 4609   | MYC     | v-myc myelocytomatosis viral o     | HALLMARK_TNI     |
| 7071   | KLF10   | Kruppel-like factor 10             | HALLMARK_TNI     |
| 3280   | HES1    | hairly and enhancer of split 1, (E | HALLMARK_TNI     |
| 22822  | PHLDA1  | pleckstrin homology-like domai     | HALLMARK_TNI     |
| 23258  | DENND5A | DENN/MADD domain containin         | HALLMARK_TNI     |

|        |          |                                                   |              |
|--------|----------|---------------------------------------------------|--------------|
| 3383   | ICAM1    | intercellular adhesion molecule                   | HALLMARK_TNI |
| 1906   | EDN1     | endothelin 1                                      | HALLMARK_TNI |
| 5734   | PTGER4   | prostaglandin E receptor 4 (sub                   | HALLMARK_TNI |
| 25816  | TNFAIP8  | tumor necrosis factor, alpha-in                   | HALLMARK_TNI |
| 5328   | PLAU     | plasminogen activator, urokina                    | HALLMARK_TNI |
| 604    | BCL6     | B-cell CLL/lymphoma 6                             | HALLMARK_TNI |
| 3726   | JUNB     | jun B proto-oncogene                              | HALLMARK_TNI |
| 2354   | FOSB     | FBJ murine osteosarcoma viral                     | HALLMARK_TNI |
| 3164   | NR4A1    | nuclear receptor subfamily 4, g                   | HALLMARK_TNI |
| 1847   | DUSP5    | dual specificity phosphatase 5                    | HALLMARK_TNI |
| 7280   | TUBB2A   | tubulin, beta 2A class IIa                        | HALLMARK_TNI |
| 602    | BCL3     | B-cell CLL/lymphoma 3                             | HALLMARK_TNI |
| 4929   | NR4A2    | nuclear receptor subfamily 4, g                   | HALLMARK_TNI |
| 10318  | TNIP1    | TNFAIP3 interacting protein 1                     | HALLMARK_TNI |
| 10725  | NFAT5    | nuclear factor of activated T-ce                  | HALLMARK_TNI |
| 11182  | SLC2A6   | solute carrier family 2 (facilitate               | HALLMARK_TNI |
| 1958   | EGR1     | early growth response 1                           | HALLMARK_TNI |
| 1959   | EGR2     | early growth response 2                           | HALLMARK_TNI |
| 23135  | KDM6B    | lysine (K)-specific demethylase                   | HALLMARK_TNI |
| 23529  | CLCF1    | cardiotrophin-like cytokine fact                  | HALLMARK_TNI |
| 24147  | FJX1     | four jointed box 1 (Drosophila)                   | HALLMARK_TNI |
| 4791   | NFKB2    | nuclear factor of kappa light po                  | HALLMARK_TNI |
| 5187   | PER1     | period homolog 1 (Drosophila)                     | HALLMARK_TNI |
| 5271   | SERPINB8 | serpin peptidase inhibitor, clad                  | HALLMARK_TNI |
| 687    | KLF9     | Kruppel-like factor 9                             | HALLMARK_TNI |
| 7262   | PHLDA2   | pleckstrin homology-like domai                    | HALLMARK_TNI |
| 8061   | FOSL1    | FOS-like antigen 1                                | HALLMARK_TNI |
| 57761  | TRIB3    | tribbles homolog 3 (Drosophila)                   |              |
| 6319   | SCD      | stearoyl-CoA desaturase (delta-9-desaturase)      |              |
| 10682  | EBP      | emopamil binding protein (sterol isomerase)       |              |
| 6309   | SC5DL    | sterol-C5-desaturase (ERG3 delta-5-desaturase)    |              |
| 1717   | DHCR7    | 7-dehydrocholesterol reductase                    |              |
| 928    | CD9      | CD9 molecule                                      |              |
| 3422   | IDI1     | isopentenyl-diphosphate delta isomerase 1         |              |
| 3157   | HMGCS1   | 3-hydroxy-3-methylglutaryl-CoA synthase 1 (sol    |              |
| 3156   | HMGCR    | 3-hydroxy-3-methylglutaryl-CoA reductase          |              |
| 9415   | FADS2    | fatty acid desaturase 2                           |              |
| 27346  | TMEM97   | transmembrane protein 97                          |              |
| 6713   | SQLE     | squalene epoxidase                                |              |
| 134429 | STARD4   | StAR-related lipid transfer (START) domain cont   |              |
| 1595   | CYP51A1  | cytochrome P450, family 51, subfamily A, polyp    |              |
| 5352   | PLOD2    | procollagen-lysine, 2-oxoglutarate 5-dioxygenase  |              |
| 112399 | EGLN3    | egl nine homolog 3 (C. elegans)                   |              |
| 23657  | SLC7A11  | solute carrier family 7 (anionic amino acid trans |              |
| 120    | ADD3     | adducin 3 (gamma)                                 |              |
| 60481  | ELOVL5   | ELOVL fatty acid elongase 5                       |              |
| 3638   | INSIG1   | insulin induced gene 1                            |              |
| 3488   | IGFBP5   | insulin-like growth factor binding protein 5      |              |
| 1718   | DHCR24   | 24-dehydrocholesterol reductase                   |              |
| 2181   | ACSL3    | acyl-CoA synthetase long-chain family member      |              |
| 440    | ASNS     | asparagine synthetase (glutamine-hydrolyzing)     |              |
| 7037   | TFRC     | transferrin receptor (p90, CD71)                  |              |

|        |           |                                                   |
|--------|-----------|---------------------------------------------------|
| 51109  | RDH11     | retinol dehydrogenase 11 (all-trans/9-cis/11-cis  |
| 8935   | SKAP2     | src kinase associated phosphoprotein 2            |
| 47     | ACLY      | ATP citrate lyase                                 |
| 79071  | ELOVL6    | ELOVL fatty acid elongase 6                       |
| 80777  | CYB5B     | cytochrome b5 type B (outer mitochondrial me      |
| 10797  | MTHFD2    | methylenetetrahydrofolate dehydrogenase (NA       |
| 9695   | EDEM1     | ER degradation enhancer, mannosidase alpha-li     |
| 586    | BCAT1     | branched chain amino-acid transaminase 1, cyt     |
| 23062  | GGA2      | golgi-associated, gamma adaptin ear containing    |
| 54843  | SYTL2     | synaptotagmin-like 2                              |
| 51330  | TNFRSF12A | tumor necrosis factor receptor superfamily, me    |
| 50814  | NSDHL     | NAD(P) dependent steroid dehydrogenase-like       |
| 2224   | FDPS      | farnesyl diphosphate synthase                     |
| 3958   | LGALS3    | lectin, galactoside-binding, soluble, 3           |
| 552    | AVPR1A    | arginine vasopressin receptor 1A                  |
| 7869   | SEMA3B    | sema domain, immunoglobulin domain (Ig), sho      |
| 2222   | FDFT1     | farnesyl-diphosphate farnesyltransferase 1        |
| 2194   | FASN      | fatty acid synthase                               |
| 214    | ALCAM     | activated leukocyte cell adhesion molecule        |
| 39     | ACAT2     | acetyl-CoA acetyltransferase 2                    |
| 51478  | HSD17B7   | hydroxysteroid (17-beta) dehydrogenase 7          |
| 4597   | MVD       | mevalonate (diphospho) decarboxylase              |
| 308    | ANXA5     | annexin A5                                        |
| 132864 | CPEB2     | cytoplasmic polyadenylation element binding p     |
| 4047   | LSS       | lanosterol synthase (2,3-oxidosqualene-lanoste    |
| 4598   | MVK       | mevalonate kinase                                 |
| 55902  | ACSS2     | acyl-CoA synthetase short-chain family member     |
| 5833   | PCYT2     | phosphate cytidyltransferase 2, ethanolamine      |
| 6721   | SREBF2    | sterol regulatory element binding transcription   |
| 4907   | NT5E      | 5'-nucleotidase, ecto (CD73)                      |
| 7040   | TGFB1     | transforming growth factor, beta 1                |
| 1292   | COL6A2    | collagen, type VI, alpha 2                        |
| 6876   | TAGLN     | transgelin                                        |
| 8038   | ADAM12    | ADAM metallopeptidase domain 12                   |
| 7078   | TIMP3     | TIMP metallopeptidase inhibitor 3                 |
| 1301   | COL11A1   | collagen, type XI, alpha 1                        |
| 5376   | PMP22     | peripheral myelin protein 22                      |
| 627    | BDNF      | brain-derived neurotrophic factor                 |
| 6591   | SNAI2     | snail homolog 2 (Drosophila)                      |
| 6696   | SPP1      | secreted phosphoprotein 1                         |
| 2014   | EMP3      | epithelial membrane protein 3                     |
| 3678   | ITGA5     | integrin, alpha 5 (fibronectin receptor, alpha po |
| 7980   | TFPI2     | tissue factor pathway inhibitor                   |
| 3956   | LGALS1    | lectin, galactoside-binding, soluble, 1           |
| 1004   | CDH6      | cadherin 6, type 2, K-cadherin (fetal kidney)     |
| 9353   | SLIT2     | slit homolog 2 (Drosophila)                       |
| 3485   | IGFBP2    | insulin-like growth factor binding protein 2, 36k |
| 7057   | THBS1     | thrombospondin 1                                  |
| 7857   | SCG2      | secretogranin II                                  |
| 23705  | CADM1     | cell adhesion molecule 1                          |
| 667    | DST       | dystonin                                          |
| 1000   | CDH2      | cadherin 2, type 1, N-cadherin (neuronal)         |

|       |          |                                                    |
|-------|----------|----------------------------------------------------|
| 10272 | FSTL3    | follistatin-like 3 (secreted glycoprotein)         |
| 11010 | GLIPR1   | GLI pathogenesis-related 1                         |
| 1294  | COL7A1   | collagen, type VII, alpha 1                        |
| 1303  | COL12A1  | collagen, type XII, alpha 1                        |
| 26585 | GREM1    | gremlin 1                                          |
| 30008 | EFEMP2   | EGF containing fibulin-like extracellular matrix p |
| 4017  | LOXL2    | lysyl oxidase-like 2                               |
| 50863 | NTM      | neurotrimin                                        |
| 5270  | SERPINE2 | serpin peptidase inhibitor, clade E (nexin, plasm  |
| 59    | ACTA2    | actin, alpha 2, smooth muscle, aorta               |
| 7431  | VIM      | vimentin                                           |
| 800   | CALD1    | caldesmon 1                                        |
| 9235  | IL32     | interleukin 32                                     |
| 1999  | ELF3     | E74-like factor 3 (ets domain transcription facto  |
| 283   | ANG      | angiogenin, ribonuclease, RNase A family, 5        |
| 3161  | HMMR     | hyaluronan-mediated motility receptor (RHAMF       |
| 4351  | MPI      | mannose phosphate isomerase                        |
| 5223  | PGAM1    | phosphoglycerate mutase 1 (brain)                  |
| 5315  | PKM2     | pyruvate kinase, muscle                            |
| 5318  | PKP2     | plakophilin 2                                      |
| 5836  | PYGL     | phosphorylase, glycogen, liver                     |
| 6676  | SPAG4    | sperm associated antigen 4                         |
| 8996  | NOL3     | nucleolar protein 3 (apoptosis repressor with C/   |
| 90161 | HS6ST2   | heparan sulfate 6-O-sulfotransferase 2             |
| 9048  | ARTN     | artemin                                            |
| 9123  | SLC16A3  | solute carrier family 16, member 3 (monocarbo      |
| 351   | APP      | amyloid beta (A4) precursor protein                |
| 3691  | ITGB4    | integrin, beta 4                                   |
| 1012  | CDH13    | cadherin 13, H-cadherin (heart)                    |
| 894   | CCND2    | cyclin D2                                          |
| 54884 | RETSAT   | retinol saturase (all-trans-retinol 13,14-reducta: |
| 10628 | TXNIP    | thioredoxin interacting protein                    |
| 2810  | SFN      | stratifin                                          |
| 6004  | RGS16    | regulator of G-protein signaling 16                |
| 3732  | CD82     | CD82 molecule                                      |
| 22824 | HSPA4L   | heat shock 70kDa protein 4-like                    |
| 6281  | S100A10  | S100 calcium binding protein A10                   |
| 1030  | CDKN2B   | cyclin-dependent kinase inhibitor 2B (p15, inhib   |
| 7378  | UPP1     | uridine phosphorylase 1                            |
| 1969  | EPHA2    | EPH receptor A2                                    |
| 1643  | DDB2     | damage-specific DNA binding protein 2, 48kDa       |
| 5429  | POLH     | polymerase (DNA directed), eta                     |
| 1263  | PLK3     | polo-like kinase 3                                 |
| 27165 | GLS2     | glutaminase 2 (liver, mitochondrial)               |
| 27244 | SESN1    | sestrin 1                                          |
| 4808  | NHLH2    | nescient helix loop helix 2                        |
| 55270 | NUDT15   | nudix (nucleoside diphosphate linked moiety X)     |
| 57763 | ANKRA2   | ankyrin repeat, family A (RFXANK-like), 2          |
| 5784  | PTPN14   | protein tyrosine phosphatase, non-receptor typ     |
| 5900  | RALGDS   | ral guanine nucleotide dissociation stimulator     |
| 64393 | ZMAT3    | zinc finger, matrin-type 3                         |
| 64787 | EPS8L2   | EPS8-like 2                                        |

|        |         |                                                    |
|--------|---------|----------------------------------------------------|
| 26353  | HSPB8   | heat shock 22kDa protein 8                         |
| 29970  | SCHIP1  | schwannomin interacting protein 1                  |
| 5621   | PRNP    | prion protein                                      |
| 2180   | ACSL1   | acyl-CoA synthetase long-chain family member       |
| 88     | ACTN2   | actinin, alpha 2                                   |
| 58     | ACTA1   | actin, alpha 1, skeletal muscle                    |
| 89     | ACTN3   | actinin, alpha 3                                   |
| 8082   | SSPN    | sarcospan (Kras oncogene-associated gene)          |
| 25937  | WWTR1   | WW domain containing transcription regulator       |
| 43     | ACHE    | acetylcholinesterase                               |
| 23175  | LPIN1   | lipin 1                                            |
| 11155  | LDB3    | LIM domain binding 3                               |
| 11156  | PTP4A3  | protein tyrosine phosphatase type IVA, member      |
| 1266   | CNN3    | calponin 3, acidic                                 |
| 1489   | CTF1    | cardiotrophin 1                                    |
| 2049   | EPHB3   | EPH receptor B3                                    |
| 2170   | FABP3   | fatty acid binding protein 3, muscle and heart (r  |
| 3490   | IGFBP7  | insulin-like growth factor binding protein 7       |
| 4620   | MYH2    | myosin, heavy chain 2, skeletal muscle, adult      |
| 58498  | MYL7    | myosin, light chain 7, regulatory                  |
| 58529  | MYOZ1   | myozenin 1                                         |
| 688    | KLF5    | Kruppel-like factor 5 (intestinal)                 |
| 8736   | MYOM1   | myomesin 1, 185kDa                                 |
| 2012   | EMP1    | epithelial membrane protein 1                      |
| 836    | CASP3   | caspase 3, apoptosis-related cysteine peptidase    |
| 8900   | CCNA1   | cyclin A1                                          |
| 3005   | H1F0    | H1 histone family, member 0                        |
| 5526   | PPP2R5B | protein phosphatase 2, regulatory subunit B', beta |
| 301    | ANXA1   | annexin A1                                         |
| 7465   | WEE1    | WEE1 homolog ( <i>S. pombe</i> )                   |
| 4000   | LMNA    | lamin A/C                                          |
| 8682   | PEA15   | phosphoprotein enriched in astrocytes 15           |
| 9890   | LPPR4   | lipid phosphate phosphatase-related protein tyrosi |
| 3480   | IGF1R   | insulin-like growth factor 1 receptor              |
| 3880   | KRT19   | keratin 19                                         |
| 27295  | PDLIM3  | PDZ and LIM domain 3                               |
| 11098  | PRSS23  | protease, serine, 23                               |
| 2317   | FLNB    | filamin B, beta                                    |
| 10202  | DHRS2   | dehydrogenase/reductase (SDR family) member        |
| 11145  | PLA2G16 | phospholipase A2, group XVI                        |
| 26509  | MYOF    | myoferlin                                          |
| 4277   | MICB    | MHC class I polypeptide-related sequence B         |
| 56603  | CYP26B1 | cytochrome P450, family 26, subfamily B, polyp     |
| 6658   | SOX3    | SRY (sex determining region Y)-box 3               |
| 799    | CALCR   | calcitonin receptor                                |
| 3856   | KRT8    | keratin 8                                          |
| 23030  | KDM4B   | lysine (K)-specific demethylase 4B                 |
| 2674   | GFRA1   | GDNF family receptor alpha 1                       |
| 347733 | TUBB2B  | tubulin, beta 2B class IIb                         |
| 375449 | MAST4   | microtubule associated serine/threonine kinase     |
| 55191  | NADSYN1 | NAD synthetase 1                                   |
| 56944  | OLFML3  | olfactomedin-like 3                                |



|        |          |                                                   |
|--------|----------|---------------------------------------------------|
| 64284  | RAB17    | RAB17, member RAS oncogene family                 |
| 6505   | SLC1A1   | solute carrier family 1 (neuronal/epithelial high |
| 8829   | NRP1     | neuropilin 1                                      |
| 3037   | HAS2     | hyaluronan synthase 2                             |
| 11099  | PTPN21   | protein tyrosine phosphatase, non-receptor typ    |
| 7035   | TFPI     | tissue factor pathway inhibitor (lipoprotein-assc |
| 5002   | SLC22A18 | solute carrier family 22, member 18               |
| 2650   | GCNT1    | glucosaminyl (N-acetyl) transferase 1, core 2     |
| 5737   | PTGFR    | prostaglandin F receptor (FP)                     |
| 11044  | PAPD7    | PAP associated domain containing 7                |
| 10659  | CELF2    | CUGBP, Elav-like family member 2                  |
| 23229  | ARHGEF9  | Cdc42 guanine nucleotide exchange factor (GEF     |
| 23576  | DDAH1    | dimethylarginine dimethylaminohydrolase 1         |
| 2869   | GRK5     | G protein-coupled receptor kinase 5               |
| 4131   | MAP1B    | microtubule-associated protein 1B                 |
| 5797   | PTPRM    | protein tyrosine phosphatase, receptor type, M    |
| 773    | CACNA1A  | calcium channel, voltage-dependent, P/Q type,     |
| 5732   | PTGER2   | prostaglandin E receptor 2 (subtype EP2), 53kDa   |
| 3662   | IRF4     | interferon regulatory factor 4                    |
| 9446   | GSTO1    | glutathione S-transferase omega 1                 |
| 4643   | MYO1E    | myosin IE                                         |
| 126669 | SHE      | Src homology 2 domain containing E                |
| 3177   | SLC29A2  | solute carrier family 29 (nucleoside transporter: |
| 23208  | SYT11    | synaptotagmin XI                                  |
| 3664   | IRF6     | interferon regulatory factor 6                    |
| 64116  | SLC39A8  | solute carrier family 39 (zinc transporter), mem  |
| 79026  | AHNAK    | AHNAK nucleoprotein                               |
| 4067   | LYN      | v-yes-1 Yamaguchi sarcoma viral related oncoge    |
| 3249   | HPN      | hepsin                                            |
| 7855   | FZD5     | frizzled family receptor 5                        |
| 10148  | EBI3     | Epstein-Barr virus induced 3                      |
| 166929 | SGMS2    | sphingomyelin synthase 2                          |
| 3656   | IRAK2    | interleukin-1 receptor-associated kinase 2        |
| 3696   | ITGB8    | integrin, beta 8                                  |
| 5027   | P2RX7    | purinergic receptor P2X, ligand-gated ion chann   |
| 558    | AXL      | AXL receptor tyrosine kinase                      |
| 5724   | PTAFR    | platelet-activating factor receptor               |
| 60675  | PROK2    | prokineticin 2                                    |
| 7439   | BEST1    | bestrophin 1                                      |
| 9966   | TNFSF15  | tumor necrosis factor (ligand) superfamily, mem   |
| 2707   | GJB3     | gap junction protein, beta 3, 31kDa               |
| 4665   | NAB2     | NGFI-A binding protein 2 (EGR1 binding protein    |
| 56521  | DNAJC12  | DnaJ (Hsp40) homolog, subfamily C, member 12      |
| 57834  | CYP4F11  | cytochrome P450, family 4, subfamily F, polypep   |
| 9547   | CXCL14   | chemokine (C-X-C motif) ligand 14                 |
| 22936  | ELL2     | elongation factor, RNA polymerase II, 2           |
| 6611   | SMS      | spermine synthase                                 |
| 84159  | ARID5B   | AT rich interactive domain 5B (MRF1-like)         |
| 6197   | RPS6KA3  | ribosomal protein S6 kinase, 90kDa, polypeptid    |
| 10627  | MYL12A   | myosin, light chain 12A, regulatory, non-sarcom   |
| 2005   | ELK4     | ELK4, ETS-domain protein (SRF accessory protei    |
| 55768  | NGLY1    | N-glycanase 1                                     |

|        |          |                                                        |
|--------|----------|--------------------------------------------------------|
| 8916   | HERC3    | hect domain and RLD 3                                  |
| 9510   | ADAMTS1  | ADAM metallopeptidase with thrombospondin              |
| 4319   | MMP10    | matrix metallopeptidase 10 (stromelysin 2)             |
| 11184  | MAP4K1   | mitogen-activated protein kinase kinase kinase         |
| 9734   | HDAC9    | histone deacetylase 9                                  |
| 9892   | SNAP91   | synaptosomal-associated protein, 91kDa homolog         |
| 9935   | MAFB     | v-maf musculoaponeurotic fibrosarcoma oncogene         |
| 28951  | TRIB2    | tribbles homolog 2 (Drosophila)                        |
| 3800   | KIF5C    | kinesin family member 5C                               |
| 3936   | LCP1     | lymphocyte cytosolic protein 1 (L-plastin)             |
| 54462  | FAM190B  | family with sequence similarity 190, member B          |
| 5593   | PRKG2    | protein kinase, cGMP-dependent, type II                |
| 5801   | PTPRR    | protein tyrosine phosphatase, receptor type, R         |
| 639    | PRDM1    | PR domain containing 1, with ZNF domain                |
| 64123  | ELTD1    | EGF, latrophilin and seven transmembrane domain        |
| 8780   | RIOK3    | RIO kinase 3 (yeast)                                   |
| 10133  | OPTN     | optineurin                                             |
| 54498  | SMOX     | spermine oxidase                                       |
| 81689  | ISCA1    | iron-sulfur cluster assembly 1 homolog (S. cerevisiae) |
| 23002  | DAAM1    | dishevelled associated activator of morphogenesis      |
| 23762  | OSBP2    | oxysterol binding protein 2                            |
| 25897  | RNF19A   | ring finger protein 19A                                |
| 26502  | NARF     | nuclear prelamin A recognition factor                  |
| 286    | ANK1     | ankyrin 1, erythrocytic                                |
| 51312  | SLC25A37 | solute carrier family 25, member 37                    |
| 55532  | SLC30A10 | solute carrier family 30, member 10                    |
| 56180  | MOSPD1   | motile sperm domain containing 1                       |
| 6622   | SNCA     | synuclein, alpha (non A4 component of amyloid)         |
| 6710   | SPTB     | spectrin, beta, erythrocytic                           |
| 80853  | JHDM1D   | jumonji C domain containing histone demethylase        |
| 8301   | PICALM   | phosphatidylinositol binding clathrin assembly protein |
| 831    | CAST     | calpastatin                                            |
| 9429   | ABCG2    | ATP-binding cassette, sub-family G (WHITE), member 2   |
| 2182   | ACSL4    | acyl-CoA synthetase long-chain family member 4         |
| 3155   | HMGCL    | 3-hydroxymethyl-3-methylglutaryl-CoA lyase             |
| 387893 | SETD8    | SET domain containing (lysine methyltransferase)       |
| 131076 | CCDC58   | coiled-coil domain containing 58                       |
| 2954   | GSTZ1    | glutathione transferase zeta 1                         |
| 5793   | PTPRG    | protein tyrosine phosphatase, receptor type, G         |
| 58476  | TP53INP2 | tumor protein p53 inducible nuclear protein 2          |
| 8608   | RDH16    | retinol dehydrogenase 16 (all-trans)                   |
| 8754   | ADAM9    | ADAM metallopeptidase domain 9                         |
| 7414   | VCL      | vinculin                                               |
| 11096  | ADAMTS5  | ADAM metallopeptidase with thrombospondin              |
| 1308   | COL17A1  | collagen, type XVII, alpha 1                           |
| 2318   | FLNC     | filamin C, gamma                                       |
| 257194 | NEGR1    | neuronal growth regulator 1                            |
| 2886   | GRB7     | growth factor receptor-bound protein 7                 |
| 3675   | ITGA3    | integrin, alpha 3 (antigen CD49C, alpha 3 subunit)     |
| 5010   | CLDN11   | claudin 11                                             |
| 51474  | LIMA1    | LIM domain and actin binding 1                         |
| 57863  | CADM3    | cell adhesion molecule 3                               |

|        |         |                                                              |
|--------|---------|--------------------------------------------------------------|
| 6237   | RRAS    | related RAS viral (r-ras) oncogene homolog                   |
| 65266  | WNK4    | WNK lysine deficient protein kinase 4                        |
| 7087   | ICAM5   | intercellular adhesion molecule 5, telencephalic             |
| 7791   | ZYX     | zyxin                                                        |
| 81607  | PVRL4   | poliovirus receptor-related 4                                |
| 80273  | GRPEL1  | GrpE-like 1, mitochondrial (E. coli)                         |
| 64859  | OBFC2A  | oligonucleotide/oligosaccharide-binding fold co              |
| 204    | AK2     | adenylate kinase 2                                           |
| 593    | BCKDHA  | branched chain keto acid dehydrogenase E1, alpha             |
| 23788  | MTCH2   | mitochondrial carrier 2                                      |
| 284    | ANGPT1  | angiopoietin 1                                               |
| 65124  | ANKRD57 | ankyrin repeat domain 57                                     |
| 7316   | UBC     | ubiquitin C                                                  |
| 7423   | VEGFB   | vascular endothelial growth factor B                         |
| 3175   | ONECUT1 | one cut homeobox 1                                           |
| 6782   | HSPA13  | heat shock protein 70kDa family, member 13                   |
| 255738 | PCSK9   | proprotein convertase subtilisin/kexin type 9                |
| 54704  | PDP1    | pyruvate dehydrogenase phosphatase catalytic subunit         |
| 10019  | SH2B3   | SH2B adaptor protein 3                                       |
| 1368   | CPM     | carboxypeptidase M                                           |
| 23348  | DOCK9   | dedicator of cytokinesis 9                                   |
| 30819  | KCNIP2  | Kv channel interacting protein 2                             |
| 3988   | LIPA    | lipase A, lysosomal acid, cholesterol esterase               |
| 4179   | CD46    | CD46 molecule, complement regulatory protein                 |
| 51440  | HPCAL4  | hippocalcin like 4                                           |
| 9806   | SPOCK2  | sparc/osteonectin, cwcv and kazal-like domains               |
| 2161   | F12     | coagulation factor XII (Hageman factor)                      |
| 5028   | P2RY1   | purinergic receptor P2Y, G-protein coupled, 1                |
| 9615   | GDA     | guanine deaminase                                            |
| 4864   | NPC1    | Niemann-Pick disease, type C1                                |
| 10998  | SLC27A5 | solute carrier family 27 (fatty acid transporter),           |
| 1734   | DIO2    | deiodinase, iodothyronine, type II                           |
| 23461  | ABCA5   | ATP-binding cassette, sub-family A (ABC1), member 5          |
| 4734   | NEDD4   | neural precursor cell expressed, developmental               |
| 50640  | PNPLA8  | patatin-like phospholipase domain containing 8               |
| 51268  | PIPOX   | pipecolic acid oxidase                                       |
| 9023   | CH25H   | cholesterol 25-hydroxylase                                   |
| 9241   | NOG     | noggin                                                       |
| 2081   | ERN1    | endoplasmic reticulum to nucleus signaling 1                 |
| 55062  | WIPI1   | WD repeat domain, phosphoinositide interacting               |
| 79094  | CHAC1   | ChaC, cation transport regulator homolog 1 (E. coli)         |
| 9451   | EIF2AK3 | eukaryotic translation initiation factor 2-alpha kinase 3    |
| 3135   | HLA-G   | major histocompatibility complex, class I, G                 |
| 7903   | ST8SIA4 | ST8 alpha-N-acetyl-neuraminide alpha-2,8-sialyltransferase 4 |
| 1615   | DARS    | aspartyl-tRNA synthetase                                     |
| 3589   | IL11    | interleukin 11                                               |
| 9437   | NCR1    | natural cytotoxicity triggering receptor 1                   |
| 51735  | RAPGEF6 | Rap guanine nucleotide exchange factor (GEF) 6               |
| 55024  | BANK1   | B-cell scaffold protein with ankyrin repeats 1               |
| 57162  | PELL1   | pellino homolog 1 (Drosophila)                               |
| 3897   | L1CAM   | L1 cell adhesion molecule                                    |
| 1382   | CRABP2  | cellular retinoic acid binding protein 2                     |

|        |          |                                                  |
|--------|----------|--------------------------------------------------|
| 774    | CACNA1B  | calcium channel, voltage-dependent, N type, al   |
| 1592   | CYP26A1  | cytochrome P450, family 26, subfamily A, polyp   |
| 316    | AOX1     | aldehyde oxidase 1                               |
| 3931   | LCAT     | lecithin-cholesterol acyltransferase             |
| 55502  | HES6     | hairy and enhancer of split 6 (Drosophila)       |
| 6560   | SLC12A4  | solute carrier family 12 (potassium/chloride tra |
| 9361   | LONP1    | lon peptidase 1, mitochondrial                   |
| 5071   | PARK2    | parkinson protein 2, E3 ubiquitin protein ligase |
| 50832  | TAS2R4   | taste receptor, type 2, member 4                 |
| 51168  | MYO15A   | myosin XVA                                       |
| 55220  | KLHDC8A  | kelch domain containing 8A                       |
| 55890  | GPRC5C   | G protein-coupled receptor, family C, group 5, r |
| 5625   | PRODH    | proline dehydrogenase (oxidase) 1                |
| 57451  | ODZ2     | odz, odd Oz/ten-m homolog 2 (Drosophila)         |
| 6262   | RYR2     | ryanodine receptor 2 (cardiac)                   |
| 6620   | SNCB     | synuclein, beta                                  |
| 778    | CACNA1F  | calcium channel, voltage-dependent, L type, alp  |
| 1845   | DUSP3    | dual specificity phosphatase 3                   |
| 5563   | PRKAA2   | protein kinase, AMP-activated, alpha 2 catalytic |
| 84441  | MAML2    | mastermind-like 2 (Drosophila)                   |
| 11104  | KATNA1   | katanin p60 (ATPase containing) subunit A 1      |
| 11133  | KPTN     | kaptin (actin binding protein)                   |
| 11135  | CDC42EP1 | CDC42 effector protein (Rho GTPase binding) 1    |
| 11190  | CEP250   | centrosomal protein 250kDa                       |
| 23022  | PALLD    | palladin, cytoskeletal associated protein        |
| 5829   | PXN      | paxillin                                         |
| 8470   | SORBS2   | sorbin and SH3 domain containing 2               |
| 8874   | ARHGEF7  | Rho guanine nucleotide exchange factor (GEF) 7   |
| 9411   | ARHGAP29 | Rho GTPase activating protein 29                 |
| 1032   | CDKN2D   | cyclin-dependent kinase inhibitor 2D (p19, inhi  |
| 10587  | TXNRD2   | thioredoxin reductase 2                          |
| 3087   | HHEX     | hematopoietically expressed homeobox             |
| 2581   | GALC     | galactosylceramidase                             |
| 664    | BNIP3    | BCL2/adenovirus E1B 19kDa interacting protein    |
| 858    | CAV2     | caveolin 2                                       |
| 9805   | SCRN1    | secernin 1                                       |
| 3953   | LEPR     | leptin receptor                                  |
| 83729  | INHBE    | inhibin, beta E                                  |
| 246    | ALOX15   | arachidonate 15-lipoxygenase                     |
| 3361   | HTR5A    | 5-hydroxytryptamine (serotonin) receptor 5A      |
| 5443   | POMC     | proopiomelanocortin                              |
| 54760  | PCSK4    | proprotein convertase subtilisin/kexin type 4    |
| 22854  | NTNG1    | netrin G1                                        |
| 3930   | LBR      | lamin B receptor                                 |
| 81624  | DIAPH3   | diaphanous homolog 3 (Drosophila)                |
| 9924   | PAN2     | PAN2 poly(A) specific ribonuclease subunit hom   |
| 5126   | PCSK2    | proprotein convertase subtilisin/kexin type 2    |
| 2987   | GUK1     | guanylate kinase 1                               |
| 404672 | GTF2H5   | general transcription factor IIH, polypeptide 5  |
| 84265  | POLR3GL  | polymerase (RNA) III (DNA directed) polypeptid   |
| 8731   | RNMT     | RNA (guanine-7-) methyltransferase               |
| 10161  | LPAR6    | lysophosphatidic acid receptor                   |

|           |            |                                                                                        |
|-----------|------------|----------------------------------------------------------------------------------------|
| 135112    | NCOA7      | nuclear receptor coactivator 7                                                         |
| 100037417 | DDTL       | D-dopachrome tautomerase-like                                                          |
| 100113407 | TMEM170B   | transmembrane protein 170B                                                             |
| 100128071 | LOC1001280 | uncharacterized LOC100128071                                                           |
| 100128264 | LOC1001282 | uncharacterized LOC100128264                                                           |
| 100129550 | LOC1001295 | uncharacterized LOC100129550                                                           |
| 100129654 | TCF24      | transcription factor 24                                                                |
| 100129662 | LOC1001296 | uncharacterized LOC100129662                                                           |
| 100129716 | LOC1001297 | uncharacterized LOC100129716                                                           |
| 100129845 | LOC1001298 | uncharacterized LOC100129845                                                           |
| 100129924 | LOC1001299 | uncharacterized LOC100129924                                                           |
| 100129995 | LOC1001299 | uncharacterized LOC100129995                                                           |
| 100130522 | LOC1001305 | uncharacterized LOC100130522                                                           |
| 100130691 | LOC1001306 | uncharacterized LOC100130691                                                           |
| 100130742 | LRRRC69    | leucine rich repeat containing 6                                                       |
| 100130950 | LOC1001309 | uncharacterized LOC100130950                                                           |
| 100131089 | LOC1001310 | uncharacterized LOC100131089                                                           |
| 100131138 | LOC1001311 | uncharacterized LOC100131138                                                           |
| 100131347 | LOC1001313 | RAD52 motif 1 pseudogene                                                               |
| 100132594 | PGAM1P5    | phosphoglycerate mutase 1 pseudogene 5                                                 |
| 100132916 | FAM159B    | family with sequence similarity 159, member B                                          |
| 100133036 | FAM95B1    | family with sequence similarity 95, member B1                                          |
| 100133091 | LOC1001330 | uncharacterized LOC100133091                                                           |
| 100134229 | LOC1001342 | uncharacterized LOC100134229                                                           |
| 100268168 | LOC1002681 | uncharacterized LOC100268168                                                           |
| 100271846 | ERVV-2     | endogenous retrovirus group V, member 2                                                |
| 100288175 | LOC1002881 | uncharacterized LOC100288175                                                           |
| 100288198 | LOC1002881 | uncharacterized LOC100288198                                                           |
| 100289098 | LOC1002890 | uncharacterized LOC100289098                                                           |
| 100289211 | LOC1002892 | uncharacterized LOC100289211                                                           |
| 100289279 | ATP5A1P9   | ATP synthase, H <sup>+</sup> transporting, mitochondrial F <sub>1</sub> F <sub>0</sub> |
| 1003      | CDH5       | cadherin 5, type 2 (vascular endothelium)                                              |
| 100302640 | LOC1003026 | uncharacterized LOC100302640                                                           |
| 100381270 | ZBED6      | zinc finger, BED-type containing 6                                                     |
| 10044     | SH2D3C     | SH2 domain containing 3C                                                               |
| 10045     | SH2D3A     | SH2 domain containing 3A                                                               |
| 100500802 | MIR3685    | microRNA 3685                                                                          |
| 100505538 | RBM26-AS1  | RBM26 antisense RNA 1 (non-protein coding)                                             |
| 100505783 | LOC1005057 | uncharacterized LOC100505783                                                           |
| 100505817 | LOC1005058 | uncharacterized LOC100505817                                                           |
| 100505881 | MAGI2-AS3  | MAGI2 antisense RNA 3 (non-protein coding)                                             |
| 100506100 | LOC1005061 | uncharacterized LOC100506100                                                           |
| 100506658 | OCLN       | occludin                                                                               |
| 100506696 | LOC1005066 | uncharacterized LOC100506696                                                           |
| 100507062 | LOC1005070 | uncharacterized LOC100507062                                                           |
| 100507103 | LOC1005071 | uncharacterized LOC100507103                                                           |
| 100507250 | LOC1005072 | uncharacterized LOC100507250                                                           |
| 100507291 | LOC1005072 | uncharacterized LOC100507291                                                           |
| 100507347 | LOC1005073 | uncharacterized LOC100507347                                                           |
| 100507401 | LOC1005074 | uncharacterized LOC100507401                                                           |
| 100507428 | LINC00458  | long intergenic non-protein coding RNA 458                                             |
| 100507436 | MICA       | MHC class I polypeptide-related sequence A                                             |

|           |            |                                                  |
|-----------|------------|--------------------------------------------------|
| 100507475 | LOC1005074 | uncharacterized LOC100507475                     |
| 100507487 | LOC1005074 | uncharacterized LOC100507487                     |
| 100507495 | LOC1005074 | uncharacterized LOC100507495                     |
| 100507501 | LOC1005075 | uncharacterized LOC100507501                     |
| 100507582 | LOC1005075 | uncharacterized LOC100507582                     |
| 10062     | NR1H3      | nuclear receptor subfamily 1, group H, member    |
| 100642175 | SPRY4-IT1  | SPRY4 intronic transcript 1 (non-protein coding) |
| 10076     | PTPRU      | protein tyrosine phosphatase, receptor type, U   |
| 10082     | GPC6       | glypican 6                                       |
| 100862728 |            | &nbsp;                                           |
| 100874002 |            | &nbsp;                                           |
| 100885848 |            | &nbsp;                                           |
| 100996419 |            | &nbsp;                                           |
| 10144     | FAM13A     | family with sequence similarity 13, member A     |
| 10150     | MBNL2      | muscleblind-like 2 (Drosophila)                  |
| 10178     | ODZ1       | odz, odd Oz/ten-m homolog 1 (Drosophila)         |
| 101926941 |            | &nbsp;                                           |
| 101926975 |            | &nbsp;                                           |
| 101926987 |            | &nbsp;                                           |
| 101927043 |            | &nbsp;                                           |
| 101927221 |            | &nbsp;                                           |
| 101927288 |            | &nbsp;                                           |
| 101927359 |            | &nbsp;                                           |
| 101927599 |            | &nbsp;                                           |
| 101927931 |            | &nbsp;                                           |
| 101928000 |            | &nbsp;                                           |
| 101928069 |            | &nbsp;                                           |
| 101928136 |            | &nbsp;                                           |
| 101928550 |            | &nbsp;                                           |
| 101928674 |            | &nbsp;                                           |
| 101928837 |            | &nbsp;                                           |
| 101929027 |            | &nbsp;                                           |
| 101929140 |            | &nbsp;                                           |
| 101929147 |            | &nbsp;                                           |
| 101929243 |            | &nbsp;                                           |
| 101929302 |            | &nbsp;                                           |
| 101929333 |            | &nbsp;                                           |
| 101929563 |            | &nbsp;                                           |
| 101929705 |            | &nbsp;                                           |
| 10223     | GPA33      | glycoprotein A33 (transmembrane)                 |
| 10233     | LRRC23     | leucine rich repeat containing 2                 |
| 10234     | LRRC17     | leucine rich repeat containing 1                 |
| 10251     | SPRY3      | sprouty homolog 3 (Drosophila)                   |
| 10252     | SPRY1      | sprouty homolog 1, antagonist of FGF signaling   |
| 102723465 |            | &nbsp;                                           |
| 102723548 |            | &nbsp;                                           |
| 102724571 |            | &nbsp;                                           |
| 102724788 |            | &nbsp;                                           |
| 102724826 |            | &nbsp;                                           |
| 10295     | BCKDK      | branched chain ketoacid dehydrogenase kinase     |
| 10344     | CCL26      | chemokine (C-C motif) ligand 26                  |
| 10345     | TRDN       | triadin                                          |

|                  |                                                   |
|------------------|---------------------------------------------------|
| 104326191        | &nbsp;                                            |
| 104355426        | &nbsp;                                            |
| 10485 C1orf61    | chromosome 1 open reading frame 61                |
| 10529 NEBL       | nebulette                                         |
| 105369758        | &nbsp;                                            |
| 105370526        | &nbsp;                                            |
| 105372482        | &nbsp;                                            |
| 105379252        | &nbsp;                                            |
| 105416157        | &nbsp;                                            |
| 10566 AKAP3      | A kinase (PRKA) anchor protein 3                  |
| 10602 CDC42EP3   | CDC42 effector protein (Rho GTPase binding) 3     |
| 10637 LEFTY1     | left-right determination factor 1                 |
| 10650 SLMO1      | slowmo homolog 1 (Drosophila)                     |
| 106614088        | &nbsp;                                            |
| 10669 CGREF1     | cell growth regulator with EF-hand domain 1       |
| 10670 RRAGA      | Ras-related GTP binding A                         |
| 10675 CSPG5      | chondroitin sulfate proteoglycan 5 (neuroglycar   |
| 10687 PNMA2      | paraneoplastic antigen MA2                        |
| 10690 FUT9       | fucosyltransferase 9 (alpha (1,3) fucosyltransfer |
| 10718 NRG3       | neuregulin 3                                      |
| 10763 NES        | nestin                                            |
| 10765 KDM5B      | lysine (K)-specific demethylase 5B                |
| 107985075        | &nbsp;                                            |
| 107986266        | &nbsp;                                            |
| 10814 CPLX2      | complexin 2                                       |
| 10826 C5orf4     | chromosome 5 open reading frame 4                 |
| 10842 PPP1R17    | protein phosphatase 1, regulatory subunit 17      |
| 10848 PPP1R13L   | protein phosphatase 1, regulatory subunit 13 lil  |
| 108570035        | &nbsp;                                            |
| 10882 C1QL1      | complement component 1, q subcomponent-lik        |
| 10955 SERINC3    | serine incorporator 3                             |
| 109616976        | &nbsp;                                            |
| 109729141        | &nbsp;                                            |
| 10981 RAB32      | RAB32, member RAS oncogene family                 |
| 11033 ADAP1      | ArfGAP with dual PH domains 1                     |
| 11043 MID2       | midline 2                                         |
| 11045 UPK1A      | uroplakin 1A                                      |
| 1106 CHD2        | chromodomain helicase DNA binding protein 2       |
| 11161 C14orf1    | chromosome 14 open reading frame 1                |
| 11186 RASSF1     | Ras association (RalGDS/AF-6) domain family m     |
| 11211 FZD10      | frizzled family receptor 10                       |
| 11221 DUSP10     | dual specificity phosphatase 10                   |
| 11240 PADI2      | peptidyl arginine deiminase, type II              |
| 11247 NXPH4      | neurexophilin 4                                   |
| 112597 LINC00152 | long intergenic non-protein coding RNA 152        |
| 112942 CCDC104   | coiled-coil domain containing 104                 |
| 1131 CHR3        | cholinergic receptor, muscarinic 3                |
| 11314 CD300A     | CD300a molecule                                   |
| 113230 LOC113230 | uncharacterized LOC113230                         |
| 113402 SFT2D1    | SFT2 domain containing 1                          |
| 113791 PIK3IP1   | phosphoinositide-3-kinase interacting protein 1   |
| 114 ADCY8        | adenylate cyclase 8 (brain)                       |

|        |           |                                                     |
|--------|-----------|-----------------------------------------------------|
| 114044 | MCM3AP-AS | MCM3AP antisense RNA 1 (non-protein coding)         |
| 114088 | TRIM9     | tripartite motif containing 9                       |
| 114134 | SLC2A13   | solute carrier family 2 (facilitated glucose transp |
| 114757 | CYGB      | cytoglobin                                          |
| 114780 | PKD1L2    | polycystic kidney disease 1-like 2                  |
| 114786 | XKR4      | XK, Kell blood group complex subunit-related fa     |
| 114805 | GALNT13   | UDP-N-acetyl-alpha-D-galactosamine:polypepti        |
| 114814 | GNRHR2    | gonadotropin-releasing hormone (type 2) recep       |
| 115111 | SLC26A7   | solute carrier family 26, member 7                  |
| 115207 | KCTD12    | potassium channel tetramerisation domain con        |
| 115265 | DDIT4L    | DNA-damage-inducible transcript 4-like              |
| 115330 | GPR146    | G protein-coupled receptor 146                      |
| 115650 | TNFRSF13C | tumor necrosis factor receptor superfamily, me      |
| 115701 | ALPK2     | alpha-kinase 2                                      |
| 115727 | RASGRP4   | RAS guanyl releasing protein 4                      |
| 115948 | CCDC151   | coiled-coil domain containing 151                   |
| 116228 | FAM36A    | family with sequence similarity 36, member A        |
| 116328 | C8orf34   | chromosome 8 open reading frame 34                  |
| 116441 | TM4SF18   | transmembrane 4 L six family member 18              |
| 116442 | RAB39B    | RAB39B, member RAS oncogene family                  |
| 116828 | CG030     | uncharacterized CG030                               |
| 116966 | WDR17     | WD repeat domain 17                                 |
| 116984 | ARAP2     | ArfGAP with RhoGAP domain, ankyrin repeat ar        |
| 117531 | TMC1      | transmembrane channel-like 1                        |
| 118472 | ZNF511    | zinc finger protein 511                             |
| 1185   | CLCN6     | chloride channel 6                                  |
| 1195   | CLK1      | CDC-like kinase 1                                   |
| 119504 | ANAPC16   | anaphase promoting complex subunit 16               |
| 1198   | CLK3      | CDC-like kinase 3                                   |
| 120227 | CYP2R1    | cytochrome P450, family 2, subfamily R, polype      |
| 120863 | DEPDC4    | DEP domain containing 4                             |
| 121457 | IKBIP     | IKBKB interacting protein                           |
| 121504 | HIST4H4   | histone cluster 4, H4                               |
| 122481 | AK7       | adenylate kinase 7                                  |
| 122525 | C14orf28  | chromosome 14 open reading frame 28                 |
| 122616 | C14orf79  | chromosome 14 open reading frame 79                 |
| 122786 | FRMD6     | FERM domain containing 6                            |
| 123606 | NIPA1     | non imprinted in Prader-Willi/Angelman syndro       |
| 124056 | NOXO1     | NADPH oxidase organizer 1                           |
| 124637 | CYB5D1    | cytochrome b5 domain containing 1                   |
| 124923 | SGK494    | uncharacterized serine/threonine-protein kinas      |
| 124944 | C17orf49  | chromosome 17 open reading frame 49                 |
| 124976 | SPNS2     | spinster homolog 2 (Drosophila)                     |
| 125228 | C18orf19  | chromosome 18 open reading frame 19                 |
| 126014 | OSCAR     | osteoclast associated, immunoglobulin-like rece     |
| 126068 | ZNF441    | zinc finger protein 441                             |
| 126353 | C19orf21  | chromosome 19 open reading frame 21                 |
| 1264   | CNN1      | calponin 1, basic, smooth muscle                    |
| 126731 | C1orf96   | chromosome 1 open reading frame 96                  |
| 1268   | CNR1      | cannabinoid receptor 1 (brain)                      |
| 126917 | IFFO2     | intermediate filament family orphan 2               |
| 127495 | LRRC39    | leucine rich repeat containing 3                    |



|        |           |                                                     |
|--------|-----------|-----------------------------------------------------|
| 127579 | DCST2     | DC-STAMP domain containing 2                        |
| 127707 | KLHDC7A   | kelch domain containing 7A                          |
| 127845 | GOLT1A    | golgi transport 1A                                  |
| 128077 | LIX1L     | Lix1 homolog (mouse)-like                           |
| 1295   | COL8A1    | collagen, type VIII, alpha 1                        |
| 1299   | COL9A3    | collagen, type IX, alpha 3                          |
| 130132 | RFTN2     | raftlin family member 2                             |
| 130162 | C2orf63   | chromosome 2 open reading frame 63                  |
| 1305   | COL13A1   | collagen, type XIII, alpha 1                        |
| 131034 | CPNE4     | copine IV                                           |
| 131096 | KCNH8     | potassium voltage-gated channel, subfamily H (      |
| 132204 | SYNPR     | synaptoporin                                        |
| 134265 | AFAP1L1   | actin filament associated protein 1-like 1          |
| 134492 | NUDCD2    | NudC domain containing 2                            |
| 135293 | PM20D2    | peptidase M20 domain containing 2                   |
| 1375   | CPT1B     | carnitine palmitoyltransferase 1B (muscle)          |
| 137994 | LETM2     | leucine zipper-EF-hand containing transmembr        |
| 138255 | C9orf135  | chromosome 9 open reading frame 135                 |
| 138429 | PIP5KL1   | phosphatidylinositol-4-phosphate 5-kinase-like      |
| 139221 | MUM1L1    | melanoma associated antigen (mutated) 1-like        |
| 139596 | UPRT      | uracil phosphoribosyltransferase (FUR1) homol       |
| 140606 | SELM      | selenoprotein M                                     |
| 140612 | ZFP28     | zinc finger protein 28 homolog (mouse)              |
| 140679 | SLC32A1   | solute carrier family 32 (GABA vesicular transpo    |
| 140691 | TRIM69    | tripartite motif containing 69                      |
| 140733 | MACROD2   | MACRO domain containing 2                           |
| 140825 | NEURL2    | neuralized homolog 2 (Drosophila)                   |
| 1416   | CRYBB2P1  | crystallin, beta B2 pseudogene                      |
| 1428   | CRYM      | crystallin, mu                                      |
| 143282 | FGFBP3    | fibroblast growth factor binding protein 3          |
| 144132 | DNHD1     | dynein heavy chain domain 1                         |
| 144195 | SLC2A14   | solute carrier family 2 (facilitated glucose transp |
| 144406 | WDR66     | WD repeat domain 66                                 |
| 144568 | A2ML1     | alpha-2-macroglobulin-like 1                        |
| 145482 | PTGR2     | prostaglandin reductase 2                           |
| 146691 | TOM1L2    | target of myb1-like 2 (chicken)                     |
| 146857 | SLFN13    | schlafen family member 13                           |
| 146923 | RUNDC1    | RUN domain containing 1                             |
| 147040 | KCTD11    | potassium channel tetramerisation domain con        |
| 147650 | LINC00085 | long intergenic non-protein coding RNA 85           |
| 147660 | ZNF578    | zinc finger protein 578                             |
| 147664 | ERVV-1    | endogenous retrovirus group V, member 1             |
| 147700 | KLC3      | kinesin light chain 3                               |
| 147837 | ZNF563    | zinc finger protein 563                             |
| 147906 | DACT3     | dapper, antagonist of beta-catenin, homolog 3 (     |
| 147965 | FAM98C    | family with sequence similarity 98, member C        |
| 148229 | ATP8B3    | ATPase, aminophospholipid transporter, class I,     |
| 148523 | C1orf51   | chromosome 1 open reading frame 51                  |
| 148534 | TMEM56    | transmembrane protein 56                            |
| 1486   | CTBS      | chitobiase, di-N-acetyl-                            |
| 148641 | SLC35F3   | solute carrier family 35, member F3                 |
| 148808 | MFSD4     | major facilitator superfamily domain containing     |

|        |           |                                                     |
|--------|-----------|-----------------------------------------------------|
| 149483 | CCDC17    | coiled-coil domain containing 1                     |
| 150    | ADRA2A    | adrenergic, alpha-2A-, receptor                     |
| 150082 | LCA5L     | Leber congenital amaurosis 5-like                   |
| 150159 | SLC9B1    | solute carrier family 9, subfamily B (cation prot   |
| 150290 | DUSP18    | dual specificity phosphatase 18                     |
| 150786 | WTH3DI    | RAB6C-like                                          |
| 151011 | 10-Sep    | septin 10                                           |
| 151176 | FAM132B   | family with sequence similarity 132, member B       |
| 151354 | FAM84A    | family with sequence similarity 84, member A        |
| 151477 | LINC00471 | long intergenic non-protein coding RNA 471          |
| 151556 | GPR155    | G protein-coupled receptor 155                      |
| 151835 | CPNE9     | copine family member IX                             |
| 153163 | MGC32805  | uncharacterized protein MGC32805                    |
| 153222 | C5orf41   | chromosome 5 open reading frame 41                  |
| 153469 | LOC153469 | uncharacterized LOC153469                           |
| 153768 | PRELID2   | PRELI domain containing 2                           |
| 154    | ADRB2     | adrenergic, beta-2-, receptor, surface              |
| 154091 | SLC2A12   | solute carrier family 2 (facilitated glucose transp |
| 1545   | CYP1B1    | cytochrome P450, family 1, subfamily B, polype      |
| 154661 | RUNDC3B   | RUN domain containing 3B                            |
| 154860 | LOC154860 | uncharacterized LOC154860                           |
| 157489 | SDAD1P1   | SDA1 domain containing 1 pseudogene 1               |
| 158035 | LINC00032 | long intergenic non-protein coding RNA 32           |
| 158038 | LINGO2    | leucine rich repeat and Ig domain containing 2      |
| 158046 | NXNL2     | nucleoredoxin-like 2                                |
| 158056 | MAMDC4    | MAM domain containing 4                             |
| 158158 | RASEF     | RAS and EF-hand domain containing                   |
| 158160 | HSD17B7P2 | hydroxysteroid (17-beta) dehydrogenase 7 pseu       |
| 158471 | PRUNE2    | prune homolog 2 (Drosophila)                        |
| 158747 | MOSPD2    | motile sperm domain containing 2                    |
| 158787 | RIBC1     | RIB43A domain with coiled-coils 1                   |
| 158880 | USP51     | ubiquitin specific peptidase 51                     |
| 161253 | REM2      | RAS (RAD and GEM)-like GTP binding 2                |
| 1613   | DAPK3     | death-associated protein kinase 3                   |
| 161357 | MDGA2     | MAM domain containing glycosylphosphatidylir        |
| 162387 | MFSD6L    | major facilitator superfamily domain containing     |
| 162417 | NAGS      | N-acetylglutamate synthase                          |
| 162967 | ZNF320    | zinc finger protein 320                             |
| 162979 | ZNF296    | zinc finger protein 296                             |
| 163404 | LPPR5     | lipid phosphate phosphatase-related protein ty      |
| 164832 | LONRF2    | LON peptidase N-terminal domain and ring fing       |
| 169044 | COL22A1   | collagen, type XXII, alpha 1                        |
| 170261 | ZCCHC12   | zinc finger, CCHC domain containing 12              |
| 170384 | FUT11     | fucosyltransferase 11 (alpha (1,3) fucosyltransfe   |
| 171546 | SPTSSA    | serine palmitoyltransferase, small subunit A        |
| 1767   | DNAH5     | dynein, axonemal, heavy chain 5                     |
| 1815   | DRD4      | dopamine receptor D4                                |
| 1850   | DUSP8     | dual specificity phosphatase 8                      |
| 1852   | DUSP9     | dual specificity phosphatase 9                      |
| 1910   | EDNRB     | endothelin receptor type B                          |
| 1912   | PHC2      | polyhomeotic homolog 2 (Drosophila)                 |
| 1948   | EFNB2     | ephrin-B2                                           |

|        |          |                                                       |
|--------|----------|-------------------------------------------------------|
| 1961   | EGR4     | early growth response 4                               |
| 196394 | AMN1     | antagonist of mitotic exit network 1 homolog (S       |
| 196996 | GRAMD2   | GRAM domain containing 2                              |
| 197187 | MGC23284 | uncharacterized LOC197187                             |
| 1995   | ELAVL3   | ELAV (embryonic lethal, abnormal vision, Drosophila)  |
| 200162 | SPAG17   | sperm associated antigen 17                           |
| 200205 | IBA57    | IBA57, iron-sulfur cluster assembly homolog (S.       |
| 200407 | CREG2    | cellular repressor of E1A-stimulated genes 2          |
| 201232 | SLC16A13 | solute carrier family 16, member 13 (monocarboxylate) |
| 201299 | RDM1     | RAD52 motif 1                                         |
| 201799 | TMEM154  | transmembrane protein 154                             |
| 201895 | C4orf34  | chromosome 4 open reading frame 34                    |
| 202051 | SPATA24  | spermatogenesis associated 24                         |
| 2021   | ENDOG    | endonuclease G                                        |
| 202134 | FAM153B  | family with sequence similarity 153, member B         |
| 202333 | CMYA5    | cardiomyopathy associated 5                           |
| 203111 | C8orf47  | chromosome 8 open reading frame 47                    |
| 203238 | C9orf93  | chromosome 9 open reading frame 93                    |
| 203259 | C9orf25  | chromosome 9 open reading frame 25                    |
| 2034   | EPAS1    | endothelial PAS domain protein 1                      |
| 2042   | EPHA3    | EPH receptor A3                                       |
| 2047   | EPHB1    | EPH receptor B1                                       |
| 205428 | C3orf58  | chromosome 3 open reading frame 58                    |
| 205860 | TRIML2   | tripartite motif family-like 2                        |
| 2103   | ESRRB    | estrogen-related receptor beta                        |
| 2173   | FABP7    | fatty acid binding protein 7, brain                   |
| 219749 | ZNF25    | zinc finger protein 25                                |
| 220004 | PPP1R32  | protein phosphatase 1, regulatory subunit 32          |
| 220441 | RNF152   | ring finger protein 152                               |
| 220965 | FAM13C   | family with sequence similarity 13, member C          |
| 221002 | RASGEF1A | RasGEF domain family, member 1A                       |
| 221178 | SPATA13  | spermatogenesis associated 13                         |
| 221416 | C6orf223 | chromosome 6 open reading frame 223                   |
| 221421 | RSPH9    | radial spoke head 9 homolog (Chlamydomonas)           |
| 221491 | C6orf1   | chromosome 6 open reading frame 1                     |
| 221662 | RBM24    | RNA binding motif protein 24                          |
| 222171 | PRR15    | proline rich 15                                       |
| 222950 | C7orf51  | chromosome 7 open reading frame 51                    |
| 223075 | CCDC129  | coiled-coil domain containing 129                     |
| 2246   | FGF1     | fibroblast growth factor 1 (acidic)                   |
| 2256   | FGF11    | fibroblast growth factor 11                           |
| 2275   | FHL3     | four and a half LIM domains 3                         |
| 22898  | DENND3   | DENN/MADD domain containing 3                         |
| 22901  | ARSG     | arylsulfatase G                                       |
| 22927  | HABP4    | hyaluronan binding protein 4                          |
| 22929  | SEPHS1   | selenophosphate synthetase 1                          |
| 2297   | FOXD1    | forkhead box D1                                       |
| 22986  | SORCS3   | sortilin-related VPS10 domain containing receptor 3   |
| 22998  | LIMCH1   | LIM and calponin homology domains 1                   |
| 22999  | RIMS1    | regulating synaptic membrane exocytosis 1             |
| 23015  | GOLGA8A  | golgin A8 family, member A                            |
| 23023  | TMCC1    | transmembrane and coiled-coil domain family 1         |

|        |           |                                                            |
|--------|-----------|------------------------------------------------------------|
| 23034  | SAMD4A    | sterile alpha motif domain containing 4A                   |
| 23037  | PDZD2     | PDZ domain containing 2                                    |
| 23061  | TBC1D9B   | TBC1 domain family, member 9B (with GRAM d                 |
| 23072  | HECW1     | HECT, C2 and WW domain containing E3 ubiqui                |
| 23081  | KDM4C     | lysine (K)-specific demethylase 4C                         |
| 23089  | PEG10     | paternally expressed 10                                    |
| 23097  | CDK19     | cyclin-dependent kinase 19                                 |
| 23120  | ATP10B    | ATPase, class V, type 10B                                  |
| 23148  | NACAD     | NAC alpha domain containing                                |
| 23237  | ARC       | activity-regulated cytoskeleton-associated prote           |
| 23253  | ANKRD12   | ankyrin repeat domain 12                                   |
| 23284  | LPHN3     | latrophilin 3                                              |
| 23336  | SYNM      | synemin, intermediate filament protein                     |
| 23349  | KIAA1045  | KIAA1045                                                   |
| 23353  | SUN1      | Sad1 and UNC84 domain containing 1                         |
| 23363  | OBSL1     | obscurin-like 1                                            |
| 23376  | UFL1      | UFM1-specific ligase 1                                     |
| 23409  | SIRT4     | sirtuin 4                                                  |
| 23433  | RHOQ      | ras homolog gene family, member Q                          |
| 23480  | SEC61G    | Sec61 gamma subunit                                        |
| 23492  | CBX7      | chromobox homolog 7                                        |
| 23523  | CABIN1    | calcineurin binding protein 1                              |
| 23671  | TMEFF2    | transmembrane protein with EGF-like and two f              |
| 23682  | RAB38     | RAB38, member RAS oncogene family                          |
| 23767  | FLRT3     | fibronectin leucine rich transmembrane protein             |
| 24139  | EML2      | echinoderm microtubule associated protein like             |
| 24141  | C20orf103 | chromosome 20 open reading frame 103                       |
| 24142  | NAT6      | N-acetyltransferase 6 (GCN5-related)                       |
| 245973 | ATP6V1C2  | ATPase, H <sup>+</sup> transporting, lysosomal 42kDa, V1 s |
| 2491   | CENPI     | centromere protein I                                       |
| 252884 | ZNF396    | zinc finger protein 396                                    |
| 252969 | NEIL2     | nei endonuclease VIII-like 2 (E. coli)                     |
| 253018 | HCG27     | HLA complex group 27 (non-protein coding)                  |
| 253152 | EPHX4     | epoxide hydrolase 4                                        |
| 253769 | WDR27     | WD repeat domain 27                                        |
| 254122 | SNX32     | sorting nexin 32                                           |
| 254187 | TSGA10IP  | testis specific, 10 interacting protein                    |
| 254528 | C16orf73  | chromosome 16 open reading frame 73                        |
| 255022 | CALHM1    | calcium homeostasis modulator 1                            |
| 255394 | TCP11L2   | t-complex 11 (mouse)-like 2                                |
| 2554   | GABRA1    | gamma-aminobutyric acid (GABA) A receptor, a               |
| 2555   | GABRA2    | gamma-aminobutyric acid (GABA) A receptor, a               |
| 255783 | PRR24     | proline rich 24                                            |
| 256329 | C11orf35  | chromosome 11 open reading frame 35                        |
| 256472 | TMEM151A  | transmembrane protein 151A                                 |
| 2565   | GABRG1    | gamma-aminobutyric acid (GABA) A receptor, g               |
| 256710 | GLIPR1L1  | GLI pathogenesis-related 1 like 1                          |
| 256714 | MAP7D2    | MAP7 domain containing 2                                   |
| 256987 | SERINC5   | serine incorporator 5                                      |
| 257407 | C2orf72   | chromosome 2 open reading frame 72                         |
| 25764  | C15orf63  | chromosome 15 open reading frame 63                        |
| 25797  | QPCT      | glutaminyl-peptide cyclotransferase                        |

|        |           |                                                  |
|--------|-----------|--------------------------------------------------|
| 25805  | BAMBI     | BMP and activin membrane-bound inhibitor ho      |
| 25827  | FBXL2     | F-box and leucine-rich repeat protein 2          |
| 25833  | POU2F3    | POU class 2 homeobox 3                           |
| 25834  | MGAT4C    | mannosyl (alpha-1,3-)-glycoprotein beta-1,4-N-   |
| 2587   | GALR1     | galanin receptor 1                               |
| 25870  | SUMF2     | sulfatase modifying factor 2                     |
| 2590   | GALNT2    | UDP-N-acetyl-alpha-D-galactosamine:polypepti     |
| 25911  | DPCD      | deleted in primary ciliary dyskinesia homolog (n |
| 25956  | SEC31B    | SEC31 homolog B ( <i>S. cerevisiae</i> )         |
| 25957  | PNISR     | PNN-interacting serine/arginine-rich protein     |
| 25961  | NUDT13    | nudix (nucleoside diphosphate linked moiety X)   |
| 26002  | MOXD1     | monooxygenase, DBH-like 1                        |
| 26025  | PCDHGA12  | protocadherin gamma subfamily A, 12              |
| 26030  | PLEKHG3   | pleckstrin homology domain containing, family    |
| 26038  | CHD5      | chromodomain helicase DNA binding protein 5      |
| 260434 | PYDC1     | PYD (pyrin domain) containing :                  |
| 26091  | HERC4     | hect domain and RLD 4                            |
| 26140  | TTLL3     | tubulin tyrosine ligase-like family, member 3    |
| 26256  | CABYR     | calcium binding tyrosine-(Y)-phosphorylation re  |
| 2628   | GATM      | glycine amidinotransferase (L-arginine:glycine a |
| 26297  | SERGEF    | secretion regulating guanine nucleotide exchan   |
| 2644   | GCHFR     | GTP cyclohydrolase I feedback regulator          |
| 26468  | LHX6      | LIM homeobox 6                                   |
| 26503  | SLC17A5   | solute carrier family 17 (anion/sugar transporte |
| 26507  | CNNM1     | cyclin M1                                        |
| 26608  | TBL2      | transducin (beta)-like 2                         |
| 2670   | GFAP      | glial fibrillary acidic protein                  |
| 2686   | GGT7      | gamma-glutamyltransferase 7                      |
| 2696   | GIPR      | gastric inhibitory polypeptide receptor          |
| 26996  | GPR160    | G protein-coupled receptor 160                   |
| 2700   | GJA3      | gap junction protein, alpha 3, 46kDa             |
| 27063  | ANKRD1    | ankyrin repeat domain 1 (cardiac muscle)         |
| 27106  | ARRDC2    | arrestin domain containing 2                     |
| 27113  | BBC3      | BCL2 binding component 3                         |
| 27120  | DKKL1     | dickkopf-like 1                                  |
| 27145  | FILIP1    | filamin A interacting protein 1                  |
| 27147  | DENND2A   | DENN/MADD domain containing 2A                   |
| 27189  | IL17C     | interleukin 17C                                  |
| 27243  | CHMP2A    | charged multivesicular body protein 2A           |
| 27253  | PCDH17    | protocadherin 17                                 |
| 27254  | CSDC2     | cold shock domain containing C2, RNA binding     |
| 27314  | RAB30     | RAB30, member RAS oncogene family                |
| 27328  | PCDH11X   | protocadherin 11 X-linked                        |
| 2734   | GLG1      | golgi glycoprotein 1                             |
| 27345  | KCNMB4    | potassium large conductance calcium-activated    |
| 27350  | APOBEC3C  | apolipoprotein B mRNA editing enzyme, catalyt    |
| 27440  | CECR5     | cat eye syndrome chromosome region, candida      |
| 2796   | GNRH1     | gonadotropin-releasing hormone 1 (luteinizing-   |
| 282996 | RBM20     | RNA binding motif protein 20                     |
| 283130 | SLC25A45  | solute carrier family 25, member 45              |
| 283131 | NEAT1     | nuclear paraspeckle assembly transcript 1 (non-  |
| 283299 | LOC283299 | uncharacterized LOC283299                        |

283335 LOC283335 uncharacterized LOC283335  
283417 DPY19L2 dpy-19-like 2 (C. elegans)  
283870 C16orf79 chromosome 16 open reading frame 79  
283927 NUDT7 nudix (nucleoside diphosphate linked moiety X)  
283932 FBXL19-AS1 FBXL19 antisense RNA 1 (non-protein coding)  
283985 FADS6 fatty acid desaturase domain family, member 6  
284207 METRNL meteorin, glial cell differentiation regulator-like  
284254 C18orf26 chromosome 18 open reading frame 26  
2843 GPR20 G protein-coupled receptor 20  
284339 TMEM145 transmembrane protein 145  
284371 ZNF841 zinc finger protein 841  
284415 VSTM1 V-set and transmembrane domain containing 1  
284422 C19orf77 chromosome 19 open reading frame 77  
284439 SLC25A42 solute carrier family 25, member 42  
284454 LOC284454 uncharacterized LOC284454  
284656 EPHA10 EPH receptor A10  
284716 RIMKLA ribosomal modification protein rimK-like family  
284729 ESPNP espin pseudogene  
285016 FAM150B family with sequence similarity 150, member B  
285141 LOC285141 uncharacterized LOC285141  
285220 EPHA6 EPH receptor A6  
285286 LOC285286 uncharacterized LOC285286  
285512 FAM13A-AS1 FAM13A antisense RNA 1 (non-protein coding)  
285550 FAM200B family with sequence similarity 200, member B  
285596 FAM153A family with sequence similarity 153, member A  
285600 KIAA0825 KIAA0825  
285605 DTWD2 DTW domain containing 2  
285613 RELL2 RELT-like 2  
285761 DCBLD1 discoidin, CUB and LCCL domain containing 1  
285830 HLA-F-AS1 HLA-F antisense RNA 1 (non-protein coding)  
285966 FAM115C family with sequence similarity 115, member C  
285973 ATG9B ATG9 autophagy related 9 homolog B (S. cerevisiae)  
286006 C7orf53 chromosome 7 open reading frame 53  
286042 FLJ10661 family with sequence similarity 86, member A p  
286046 XKR6 XK, Kell blood group complex subunit-related fa  
286059 LOC286059 tumor necrosis factor receptor superfamily, me  
2861 GPR37 G protein-coupled receptor 37 (endothelin rece  
286411 RP1-177G6.2 uncharacterized LOC286411  
28983 TMPRSS11E transmembrane protease, serine 11E  
2903 GRIN2A glutamate receptor, ionotropic, N-methyl D-asp  
29085 PHPT1 phosphohistidine phosphatase  
2925 GRPR gastrin-releasing peptide receptor  
2978 GUCA1A guanylate cyclase activator 1A (retina)  
29902 C12orf24 chromosome 12 open reading frame 24  
29923 C7orf68 chromosome 7 open reading frame 68  
3039 HBA1 hemoglobin, alpha 1  
306 ANXA3 annexin A3  
30817 EMR2 egf-like module containing, mucin-like, hormon  
3084 NRG1 neuregulin 1  
3097 HIVEP2 human immunodeficiency virus type I enhancer  
3139 HLA-L major histocompatibility complex, class I, L, pse  
317671 RFESD Rieske (Fe-S) domain containinç

|        |           |                                                    |
|--------|-----------|----------------------------------------------------|
| 3241   | HPCAL1    | hippocalcin-like 1                                 |
| 3263   | HPX       | hemopexin                                          |
| 326624 | RAB37     | RAB37, member RAS oncogene family                  |
| 326625 | MMAB      | methylmalonic aciduria (cobalamin deficiency) c    |
| 3292   | HSD17B1   | hydroxysteroid (17-beta) dehydrogenase 1           |
| 3300   | DNAJB2    | DnaJ (Hsp40) homolog, subfamily B, member 2        |
| 3338   | DNAJC4    | DnaJ (Hsp40) homolog, subfamily C, member 4        |
| 3358   | HTR2C     | 5-hydroxytryptamine (serotonin) receptor 2C        |
| 3373   | HYAL1     | hyaluronoglucosaminidase 1                         |
| 338382 | RAB7B     | RAB7B, member RAS oncogene family                  |
| 338596 | ST8SIA6   | ST8 alpha-N-acetyl-neuraminide alpha-2,8-sialyl    |
| 338657 | CCDC84    | coiled-coil domain containing 8                    |
| 338739 | LOC338739 | uncharacterized LOC338739                          |
| 339105 | PRSS53    | protease, serine, 53                               |
| 339210 | C17orf67  | chromosome 17 open reading frame 67                |
| 3400   | ID4       | inhibitor of DNA binding 4, dominant negative b    |
| 340526 | RGAG4     | retrotransposon gag domain containing 4            |
| 340527 | NHSL2     | NHS-like 2                                         |
| 340533 | KIAA2022  | KIAA2022                                           |
| 341405 | ANKRD33   | ankyrin repeat domain 33                           |
| 341880 | SLC35F4   | solute carrier family 35, member F4                |
| 342667 | STAC2     | SH3 and cysteine rich domain 2                     |
| 3428   | IFI16     | interferon, gamma-inducible protein 16             |
| 342908 | ZNF404    | zinc finger protein 404                            |
| 343578 | ARHGAP40  | Rho GTPase activating protein 40                   |
| 343990 | C2orf55   | chromosome 2 open reading frame 55                 |
| 345757 | FAM174A   | family with sequence similarity 174, member A      |
| 346171 | ZFP57     | zinc finger protein 57 homolog (mouse)             |
| 346389 | MACC1     | metastasis associated in colon cancer 1            |
| 353149 | TBC1D26   | TBC1 domain family, member 26                      |
| 353189 | SLCO4C1   | solute carrier organic anion transporter family, l |
| 353322 | ANKRD37   | ankyrin repeat domain 37                           |
| 353324 | SPATA12   | spermatogenesis associated 12                      |
| 353497 | POLN      | polymerase (DNA directed) nu                       |
| 3556   | IL1RAP    | interleukin 1 receptor accessory protein           |
| 3570   | IL6R      | interleukin 6 receptor                             |
| 3579   | CXCR2     | chemokine (C-X-C motif) receptor 2                 |
| 3621   | ING1      | inhibitor of growth family, member 1               |
| 3635   | INPP5D    | inositol polyphosphate-5-phosphatase, 145kDa       |
| 3727   | JUND      | jun D proto-oncogene                               |
| 374378 | GALNTL4   | UDP-N-acetyl-alpha-D-galactosamine:polypepti       |
| 374383 | B7H6      | B7 homolog 6                                       |
| 374875 | HSD11B1L  | hydroxysteroid (11-beta) dehydrogenase 1-like      |
| 374879 | ZNF699    | zinc finger protein 699                            |
| 374887 | YJEFN3    | YjeF N-terminal domain containing 3                |
| 375033 | PEAR1     | platelet endothelial aggregation receptor 1        |
| 3754   | KCNF1     | potassium voltage-gated channel, subfamily F, r    |
| 375607 | C7orf52   | chromosome 7 open reading frame 52                 |
| 375791 | C9orf169  | chromosome 9 open reading frame 169                |
| 3763   | KCNJ6     | potassium inwardly-rectifying channel, subfamil    |
| 376940 | ZC3H6     | zinc finger CCCH-type containing 6                 |
| 3775   | KCNK1     | potassium channel, subfamily K, member 1           |

|        |              |                                                 |
|--------|--------------|-------------------------------------------------|
| 377677 | CA13         | carbonic anhydrase XIII                         |
| 3787   | KCNS1        | potassium voltage-gated channel, delayed-recti  |
| 378805 | FLJ43663     | uncharacterized LOC378805                       |
| 387597 | ILDR2        | immunoglobulin-like domain containing receptc   |
| 387841 | RPL13AP20    | ribosomal protein L13a pseudogene 20            |
| 387856 | C12orf68     | chromosome 12 open reading frame 68             |
| 387914 | SHISA2       | shisa homolog 2 ( <i>Xenopus laevis</i> )       |
| 388284 | C16orf86     | chromosome 16 open reading frame 86             |
| 388403 | YPEL2        | yippee-like 2 ( <i>Drosophila</i> )             |
| 388555 | IGFL3        | IGF-like family member 3                        |
| 388558 | ZNF808       | zinc finger protein 808                         |
| 388566 | ZNF470       | zinc finger protein 470                         |
| 388611 | CD164L2      | CD164 sialomucin-like 2                         |
| 388650 | FAM69A       | family with sequence similarity 69, member A    |
| 389058 | SP5          | Sp5 transcription factor                        |
| 389337 | ARHGEF37     | Rho guanine nucleotide exchange factor (GEF) 3  |
| 389524 | GTF2IRD2B    | GTF2I repeat domain containing 2B               |
| 389549 | FEZF1        | FEZ family zinc finger 1                        |
| 389641 | LOC389641    | uncharacterized LOC389641                       |
| 389792 | IER5L        | immediate early response 5-like                 |
| 389840 | MAP3K15      | mitogen-activated protein kinase kinase kinase  |
| 389941 | C1QL3        | complement component 1, q subcomponent-lik      |
| 3965   | LGALS9       | lectin, galactoside-binding, soluble, 9         |
| 397    | ARHGDI3      | Rho GDP dissociation inhibitor (GDI) beta       |
| 399715 | LOC399715    | uncharacterized LOC399715                       |
| 399726 | C10orf114    | chromosome 10 open reading frame 114            |
| 399947 | C11orf87     | chromosome 11 open reading frame 87             |
| 399959 | MIR100HG     | mir-100-let-7a-2 cluster host gene (non-protein |
| 40     | ACCN1        | amiloride-sensitive cation channel 1, neuronal  |
| 400073 | C12orf76     | chromosome 12 open reading frame 76             |
| 400242 | DICER1-AS    | DICER1 antisense RNA (non-protein coding)       |
| 400464 | LOC400464    | uncharacterized LOC400464                       |
| 400499 | LOC400499    | uncharacterized LOC400499                       |
| 400604 | LOC400604    | uncharacterized LOC400604                       |
| 4007   | PRICKLE3     | prickle homolog 3 ( <i>Drosophila</i> )         |
| 400745 | SH2D5        | SH2 domain containing 5                         |
| 400960 | PCBP1-AS1    | PCBP1 antisense RNA 1 (non-protein coding)      |
| 401074 | LOC401074    | uncharacterized LOC401074                       |
| 401089 | C3orf72      | chromosome 3 open reading frame 72              |
| 401152 | C4orf3       | chromosome 4 open reading frame 3               |
| 401232 | DKFZP686I15E | uncharacterized LOC401232                       |
| 401237 | LINC00340    | long intergenic non-protein coding RNA 340      |
| 401251 | C6orf26      | chromosome 6 open reading frame 26              |
| 401265 | KLHL31       | kelch-like 31 ( <i>Drosophila</i> )             |
| 401491 | FLJ35024     | uncharacterized LOC401491                       |
| 4070   | TACSTD2      | tumor-associated calcium signal transducer 2    |
| 4093   | SMAD9        | SMAD family member 9                            |
| 414241 | FAM35B       | family with sequence similarity 35, member A p  |
| 4162   | MCAM         | melanoma cell adhesion molecule                 |
| 4168   | MCF2         | MCF.2 cell line derived transforming sequence   |
| 4293   | MAP3K9       | mitogen-activated protein kinase kinase kinase  |
| 4311   | MME          | membrane metallo-endopeptidase                  |



|        |           |                                                          |
|--------|-----------|----------------------------------------------------------|
| 432    | ASGR1     | asialoglycoprotein receptor 1                            |
| 4327   | MMP19     | matrix metalloproteinase 19                              |
| 439921 | MXRA7     | matrix-remodelling associated                            |
| 439965 | FAM35B2   | family with sequence similarity 35, member A             |
| 439990 | LOC439990 | uncharacterized LOC439990                                |
| 440026 | TMEM41B   | transmembrane protein 41B                                |
| 440104 | LOC440104 | 1110012D08Rik pseudogene                                 |
| 440270 | GOLGA8B   | golgin A8 family, member B                               |
| 440584 | FLJ32224  | uncharacterized LOC440584                                |
| 440823 | MIAT      | myocardial infarction associated transcript (non         |
| 440952 | FLJ33065  | uncharacterized LOC440952                                |
| 441054 | C4orf47   | chromosome 4 open reading frame 47                       |
| 441150 | C6orf226  | chromosome 6 open reading frame 226                      |
| 441168 | FAM26F    | family with sequence similarity 26, member F             |
| 441282 | AKR1B15   | aldo-keto reductase family 1, member B15                 |
| 441531 | PGAM4     | phosphoglycerate mutase family member 4                  |
| 4501   | MT1X      | metallothionein 1X                                       |
| 4549   | RNR1      | s-rRNA                                                   |
| 4584   | MUC3A     | mucin 3A, cell surface associated                        |
| 4741   | NEFM      | neurofilament, medium polypeptide                        |
| 4747   | NEFL      | neurofilament, light polypeptide                         |
| 4758   | NEU1      | sialidase 1 (lysosomal sialidase)                        |
| 4776   | NFATC4    | nuclear factor of activated T-cells, cytoplasmic,        |
| 4804   | NGFR      | nerve growth factor receptor                             |
| 4861   | NPAS1     | neuronal PAS domain protein 1                            |
| 4862   | NPAS2     | neuronal PAS domain protein 2                            |
| 4879   | NPPB      | natriuretic peptide B                                    |
| 4901   | NRL       | neural retina leucine zipper                             |
| 491    | ATP2B2    | ATPase, Ca <sup>++</sup> transporting, plasma membrane 2 |
| 494513 | DFNB59    | deafness, autosomal recessive 59                         |
| 49854  | ZNF295    | zinc finger protein 295                                  |
| 49855  | SCAPER    | S-phase cyclin A-associated protein in the ER            |
| 5016   | OVGP1     | oviductal glycoprotein 1, 120kDa                         |
| 5017   | OVOL1     | ovo-like 1(Drosophila)                                   |
| 5032   | P2RY11    | purinergic receptor P2Y, G-protein coupled, 11           |
| 50487  | PLA2G3    | phospholipase A2, group III                              |
| 50506  | DUOX2     | dual oxidase 2                                           |
| 50615  | IL21R     | interleukin 21 receptor                                  |
| 5069   | PAPPA     | pregnancy-associated plasma protein A, pappal            |
| 50840  | TAS2R14   | taste receptor, type 2, member 14                        |
| 51003  | MED31     | mediator complex subunit 31                              |
| 51008  | ASCC1     | activating signal cointegrator 1 complex subunit         |
| 51019  | CCDC53    | coiled-coil domain containing 5                          |
| 51085  | MLXIPL    | MLX interacting protein-like                             |
| 51131  | PHF11     | PHD finger protein 11                                    |
| 51141  | INSIG2    | insulin induced gene 2                                   |
| 51144  | HSD17B12  | hydroxysteroid (17-beta) dehydrogenase 12                |
| 51202  | DDX47     | DEAD (Asp-Glu-Ala-Asp) box polypeptide 47                |
| 51228  | GLTP      | glycolipid transfer protein                              |
| 51232  | CRIM1     | cysteine rich transmembrane BMP regulator 1 (            |
| 51265  | CDKL3     | cyclin-dependent kinase-like 3                           |
| 51276  | ZNF571    | zinc finger protein 571                                  |

|        |         |                                                       |
|--------|---------|-------------------------------------------------------|
| 51299  | NRN1    | neuritin 1                                            |
| 51301  | GCNT4   | glucosaminyl (N-acetyl) transferase 4, core 2         |
| 51339  | DACT1   | dapper, antagonist of beta-catenin, homolog 1 (       |
| 51400  | PPME1   | protein phosphatase methylesterase 1                  |
| 51421  | AMOTL2  | angiomin like 2                                       |
| 51422  | PRKAG2  | protein kinase, AMP-activated, gamma 2 non-ca         |
| 51428  | DDX41   | DEAD (Asp-Glu-Ala-Asp) box polypeptide 41             |
|        | 5143    | PDE4C phosphodiesterase 4C, cAMP-specific             |
|        | 5144    | PDE4D phosphodiesterase 4D, cAMP-specific             |
| 51454  | GULP1   | GULP, engulfment adaptor PTB domain containi          |
| 51517  | NCKIPSD | NCK interacting protein with SH3 domain               |
| 51537  | MTFP1   | mitochondrial fission process 1                       |
| 51545  | ZNF581  | zinc finger protein 581                               |
| 51560  | RAB6B   | RAB6B, member RAS oncogene family                     |
| 51655  | RASD1   | RAS, dexamethasone-induced 1                          |
| 51760  | SYT17   | synaptotagmin XVII                                    |
|        | 5210    | PFKFB4 6-phosphofructo-2-kinase/fructose-2,6-biphosp  |
|        | 5277    | PIGA phosphatidylinositol glycan anchor biosynthesis  |
|        | 5283    | PIGH phosphatidylinositol glycan anchor biosynthesis  |
|        | 5333    | PLCD1 phospholipase C, delta 1                        |
| 53345  | TM6SF2  | transmembrane 6 superfamily member 2                  |
| 53358  | SHC3    | SHC (Src homology 2 domain containing) transfr        |
|        | 5336    | PLCG2 phospholipase C, gamma 2 (phosphatidylinositc   |
|        | 5355    | PLP2 proteolipid protein 2 (colonic epithelium-enrich |
| 53616  | ADAM22  | ADAM metallopeptidase domain 22                       |
|        | 5387    | PMS2P3 postmeiotic segregation increased 2 pseudogen  |
| 53916  | RAB4B   | RAB4B, member RAS oncogene family                     |
| 54101  | RIPK4   | receptor-interacting serine-threonine kinase 4        |
|        | 5413    | 5-Sep septin 5                                        |
| 541565 | C8orf58 | chromosome 8 open reading frame 58                    |
| 54187  | NANS    | N-acetylneuraminic acid synthase                      |
| 54329  | GPR85   | G protein-coupled receptor 85                         |
| 54361  | WNT4    | wingless-type MMTV integration site family, me        |
| 54429  | TAS2R5  | taste receptor, type 2, member 5                      |
| 54438  | GFOD1   | glucose-fructose oxidoreductase domain contai         |
| 54455  | FBXO42  | F-box protein 42                                      |
| 54511  | HMGCLL1 | 3-hydroxymethyl-3-methylglutaryl-CoA lyase-lik        |
|        | 5453    | POU3F1 POU class 3 homeobox 1                         |
| 54532  | USP53   | ubiquitin specific peptidase 53                       |
| 54551  | MAGEL2  | MAGE-like 2                                           |
| 54583  | EGLN1   | egl nine homolog 1 (C. elegans)                       |
| 54585  | LZTFL1  | leucine zipper transcription factor-like 1            |
| 54626  | HES2    | hairy and enhancer of split 2 (Drosophila)            |
| 54665  | RSBN1   | round spermatid basic protein 1                       |
| 54715  | RBFOX1  | RNA binding protein, fox-1 homolog (C. elegans)       |
| 54762  | GRAMD1C | GRAM domain containing 1C                             |
| 54798  | DCHS2   | dachsous 2 (Drosophila)                               |
| 54805  | CNNM2   | cyclin M2                                             |
| 54814  | QPCTL   | glutaminyl-peptide cyclotransferase-like              |
| 54836  | BSPRY   | B-box and SPRY domain containing                      |
| 54858  | PGPEP1  | pyroglutamyl-peptidase I                              |
| 54890  | ALKBH5  | alkB, alkylation repair homolog 5 (E. coli)           |

|        |           |                                                          |
|--------|-----------|----------------------------------------------------------|
| 54894  | RNF43     | ring finger protein 43                                   |
| 54928  | IMPAD1    | inositol monophosphatase domain containing 1             |
| 5493   | PPL       | periplakin                                               |
| 54932  | EXD3      | exonuclease 3'-5' domain containing 3                    |
| 54985  | HCFC1R1   | host cell factor C1 regulator 1 (XPO1 dependent          |
| 550112 | LOC550112 | uncharacterized LOC550112                                |
| 55106  | SLFN12    | schlafen family member 12                                |
| 55112  | WDR60     | WD repeat domain 60                                      |
| 55118  | CRTAC1    | cartilage acidic protein 1                               |
| 55150  | C19orf73  | chromosome 19 open reading frame 73                      |
| 55186  | SLC25A36  | solute carrier family 25, member 36                      |
| 55214  | LEPREL1   | leprecan-like 1                                          |
| 55236  | UBA6      | ubiquitin-like modifier activating enzyme 6              |
| 55279  | ZNF654    | zinc finger protein 654                                  |
| 55314  | TMEM144   | transmembrane protein 144                                |
| 55321  | C20orf46  | chromosome 20 open reading frame 46                      |
| 5533   | PPP3CC    | protein phosphatase 3, catalytic subunit, gamma          |
| 55351  | STK32B    | serine/threonine kinase 32B                              |
| 55357  | TBC1D2    | TBC1 domain family, member 2                             |
| 554251 | FBXO48    | F-box protein 48                                         |
| 554279 | C1orf98   | chromosome 1 open reading frame 98                       |
| 55534  | MAML3     | mastermind-like 3 (Drosophila)                           |
| 55556  | ENOSF1    | enolase superfamily member 1                             |
| 55640  | FLVCR2    | feline leukemia virus subgroup C cellular receptor       |
| 55647  | RAB20     | RAB20, member RAS oncogene family                        |
| 55650  | PIGV      | phosphatidylinositol glycan anchor biosynthesis          |
| 55689  | YEATS2    | YEATS domain containing 2                                |
| 55691  | FRMD4A    | FERM domain containing 4A                                |
| 5570   | PKIB      | protein kinase (cAMP-dependent, catalytic) inhibitor     |
| 55726  | C12orf11  | chromosome 12 open reading frame 11                      |
| 55760  | DHX32     | DEAH (Asp-Glu-Ala-His) box polypeptide 32                |
| 55784  | MCTP2     | multiple C2 domains, transmembrane 2                     |
| 55799  | CACNA2D3  | calcium channel, voltage-dependent, alpha 2/delta        |
| 55800  | SCN3B     | sodium channel, voltage-gated, type III, beta            |
| 55805  | LRP2BP    | LRP2 binding protein                                     |
| 55824  | PAG1      | phosphoprotein associated with glycosphingolipid         |
| 55893  | ZNF395    | zinc finger protein 395                                  |
| 55917  | CTTNBP2NL | CTTNBP2 N-terminal like                                  |
| 55974  | SLC50A1   | solute carrier family 50 (sugar transporter), member     |
| 5598   | MAPK7     | mitogen-activated protein kinase 7                       |
| 56033  | BARX1     | BARX homeobox 1                                          |
| 5604   | MAP2K1    | mitogen-activated protein kinase kinase 1                |
| 56109  | PCDHGA6   | protocadherin gamma subfamily A, 6                       |
| 56135  | PCDHAC1   | protocadherin alpha subfamily C, 1                       |
| 56204  | KIAA1370  | KIAA1370                                                 |
| 56256  | SERTAD4   | SERTA domain containing 4                                |
| 56270  | WDR45L    | WDR45-like                                               |
| 56301  | SLC7A10   | solute carrier family 7 (neutral amino acid transporter) |
| 56341  | PRMT8     | protein arginine methyltransferase 8                     |
| 56477  | CCL28     | chemokine (C-C motif) ligand 28                          |
| 56849  | TCEAL7    | transcription elongation factor A (SII)-like 7           |
| 56899  | ANKS1B    | ankyrin repeat and sterile alpha motif domain containing |

|       |          |                                                   |
|-------|----------|---------------------------------------------------|
| 56901 | NDUFA4L2 | NADH dehydrogenase (ubiquinone) 1 alpha sub       |
| 56913 | C1GALT1  | core 1 synthase, glycoprotein-N-acetylgalactosa   |
| 56917 | MEIS3    | Meis homeobox 3                                   |
| 56929 | FEM1C    | fem-1 homolog c (C. elegans)                      |
| 56950 | SMYD2    | SET and MYND domain containing 2                  |
| 56985 | C17orf48 | chromosome 17 open reading frame 48               |
| 57035 | C1orf63  | chromosome 1 open reading frame 63                |
| 57110 | HRASLS   | HRAS-like suppressor                              |
| 57111 | RAB25    | RAB25, member RAS oncogene family                 |
| 57125 | PLXDC1   | plexin domain containing 1                        |
| 57168 | ASPHD2   | aspartate beta-hydroxylase domain containing :    |
| 57188 | ADAMTSL3 | ADAMTS-like 3                                     |
| 57221 | KIAA1244 | KIAA1244                                          |
| 57393 | TMEM27   | transmembrane protein 27                          |
| 57396 | CLK4     | CDC-like kinase 4                                 |
| 5742  | PTGS1    | prostaglandin-endoperoxide synthase 1 (prosta;    |
| 57469 | PNMAL2   | PNMA-like 2                                       |
| 57475 | PLEKHH1  | pleckstrin homology domain containing, family     |
| 57488 | ESYT2    | extended synaptotagmin-like protein 2             |
| 57493 | HEG1     | HEG homolog 1 (zebrafish)                         |
| 57497 | LRFN2    | leucine rich repeat and fibronectin type III doma |
| 57501 | KIAA1257 | KIAA1257                                          |
| 57519 | STARD9   | StAR-related lipid transfer (START) domain cont   |
| 57524 | CASKIN1  | CASK interacting protein 1                        |
| 57526 | PCDH19   | protocadherin 19                                  |
| 57528 | KCTD16   | potassium channel tetramerisation domain con      |
| 57529 | RGAG1    | retrotransposon gag domain containing 1           |
| 57535 | KIAA1324 | KIAA1324                                          |
| 57546 | PDP2     | pyruvate dehydrogenase phosphatase catalytic s    |
| 57559 | STAMBPL1 | STAM binding protein-like 1                       |
| 57561 | ARRDC3   | arrestin domain containing 3                      |
| 57574 | 4-Mar    | membrane-associated ring finger (C3HC4) 4         |
| 57575 | PCDH10   | protocadherin 10                                  |
| 57616 | TSHZ3    | teashirt zinc finger homeobox 3                   |
| 57643 | ZSWIM5   | zinc finger, SWIM-type containing 5               |
| 57644 | MYH7B    | myosin, heavy chain 7B, cardiac muscle, beta      |
| 57683 | ZDBF2    | zinc finger, DBF-type containing 2                |
| 57690 | TNRC6C   | trinucleotide repeat containing 6C                |
| 577   | BAI3     | brain-specific angiogenesis inhibitor 3           |
| 57709 | SLC7A14  | solute carrier family 7 (orphan transporter), me  |
| 57711 | ZNF529   | zinc finger protein 529                           |
| 57715 | SEMA4G   | sema domain, immunoglobulin domain (Ig), tra      |
| 57732 | ZFYVE28  | zinc finger, FYVE domain containing 28            |
| 57801 | HES4     | hairy and enhancer of split 4 (Drosophila)        |
| 5787  | PTPRB    | protein tyrosine phosphatase, receptor type, B    |
| 5794  | PTPRH    | protein tyrosine phosphatase, receptor type, H    |
| 5798  | PTPRN    | protein tyrosine phosphatase, receptor type, N    |
| 5800  | PTPRO    | protein tyrosine phosphatase, receptor type, O    |
| 583   | BBS2     | Bardet-Biedl syndrome 2                           |
| 5870  | RAB6A    | RAB6A, member RAS oncogene family                 |
| 5872  | RAB13    | RAB13, member RAS oncogene family                 |
| 5923  | RASGRF1  | Ras protein-specific guanine nucleotide-releasir  |

|        |            |                                                  |
|--------|------------|--------------------------------------------------|
| 59269  | HIVEP3     | human immunodeficiency virus type I enhancer     |
| 5939   | RBMS2      | RNA binding motif, single stranded interacting p |
| 5997   | RGS2       | regulator of G-protein signaling 2, 24kDa        |
| 5998   | RGS3       | regulator of G-protein signaling 3               |
| 6000   | RGS7       | regulator of G-protein signaling 7               |
| 6001   | RGS10      | regulator of G-protein signaling 10              |
| 6018   | RLF        | rearranged L-myc fusion                          |
| 6019   | RLN2       | relaxin 2                                        |
| 60401  | EDA2R      | ectodysplasin A2 receptor                        |
| 60468  | BACH2      | BTB and CNC homology 1, basic leucine zipper t   |
| 60676  | PAPPA2     | pappalysin 2                                     |
| 60682  | SMAP1      | small ArfGAP 1                                   |
| 6092   | ROBO2      | roundabout, axon guidance receptor, homolog      |
| 6307   | MSMO1      | methylsterol monooxygenase 1                     |
| 6322   | SCML1      | sex comb on midleg-like 1 (Drosophila)           |
| 6330   | SCN4B      | sodium channel, voltage-gated, type IV, beta     |
| 63875  | MRPL17     | mitochondrial ribosomal protein L17              |
| 63917  | GALNT11    | UDP-N-acetyl-alpha-D-galactosamine:polypepti     |
| 6405   | SEMA3F     | sema domain, immunoglobulin domain (Ig), sho     |
| 6406   | SEMG1      | semenogelin I                                    |
| 64063  | PRSS22     | protease, serine, 22                             |
| 64102  | TNMD       | tenomodulin                                      |
| 641371 | ACOT1      | acyl-CoA thioesterase 1                          |
| 641649 | TMEM91     | transmembrane protein 91                         |
| 64218  | SEMA4A     | sema domain, immunoglobulin domain (Ig), tra     |
| 642273 | FAM110C    | family with sequence similarity 110, member C    |
| 64236  | PDLIM2     | PDZ and LIM domain 2 (mystique)                  |
| 64285  | RHBDF1     | rhomboid 5 homolog 1 (Drosophila)                |
| 642946 | FLVCR1-AS1 | FLVCR1 antisense RNA 1 (non-protein coding)      |
| 642987 | TMEM232    | transmembrane protein 232                        |
| 64343  | AZI2       | 5-azacytidine induced 2                          |
| 643641 | ZNF862     | zinc finger protein 862                          |
| 644242 | LOC644242  | uncharacterized LOC644242                        |
| 64430  | C14orf135  | chromosome 14 open reading frame 135             |
| 64478  | CSMD1      | CUB and Sushi multiple domains 1                 |
| 64506  | CPEB1      | cytoplasmic polyadenylation element binding p    |
| 645166 | LOC645166  | lymphocyte-specific protein 1 pseudogene         |
| 645426 | TMEM191C   | transmembrane protein 191C                       |
| 645591 | LOC645591  | uncharacterized LOC645591                        |
| 6457   | SH3GL3     | SH3-domain GRB2-like 3                           |
| 645784 | ANKRD36BP  | ankyrin repeat domain 36B pseudogene 2           |
| 6461   | SHB        | Src homology 2 domain containing adaptor prot    |
| 64651  | CSRNP1     | cysteine-serine-rich nuclear protein 1           |
| 646658 | SYNDIG1L   | synapse differentiation inducing 1-like          |
| 64778  | FNDC3B     | fibronectin type III domain containing 3B        |
| 64799  | IQCH       | IQ motif containing H                            |
| 64900  | LPIN3      | lipin 3                                          |
| 64926  | RASAL3     | RAS protein activator like 3                     |
| 65009  | NDRG4      | NDRG family member 4                             |
| 65010  | SLC26A6    | solute carrier family 26, member 6               |
| 65084  | TMEM135    | transmembrane protein 135                        |
| 651746 | ANKRD33B   | ankyrin repeat domain 33B                        |

|        |             |                                                  |
|--------|-------------|--------------------------------------------------|
| 653319 | KIAA0895L   | KIAA0895-like                                    |
| 653583 | PHLDB3      | pleckstrin homology-like domain, family B, men   |
| 6543   | SLC8A2      | solute carrier family 8 (sodium/calcium exchang  |
| 6546   | SLC8A1      | solute carrier family 8 (sodium/calcium exchang  |
| 6547   | SLC8A3      | solute carrier family 8 (sodium/calcium exchang  |
| 6553   | SLC9A5      | solute carrier family 9 (sodium/hydrogen excha   |
| 65981  | CAPRIN2     | caprin family member 2                           |
| 65985  | AACS        | acetoacetyl-CoA synthetase                       |
| 65996  | MGC2752     | CENPB DNA-binding domains containing 1 pseu      |
| 661    | POLR3D      | polymerase (RNA) III (DNA directed) polypeptid   |
| 6615   | SNAI1       | snail homolog 1 (Drosophila)                     |
| 6617   | SNAPC1      | small nuclear RNA activating complex, polypept   |
| 6619   | SNAPC3      | small nuclear RNA activating complex, polypept   |
| 6640   | SNTA1       | syntrophin, alpha 1 (dystrophin-associated prot  |
| 6674   | SPAG1       | sperm associated antigen 1                       |
| 6690   | SPINK1      | serine peptidase inhibitor, Kazal type 1         |
| 6751   | SSTR1       | somatostatin receptor 1                          |
| 677768 | SCARNA13    | small Cajal body-specific RNA 1.                 |
| 6804   | STX1A       | syntaxin 1A (brain)                              |
| 6855   | SYP         | synaptophysin                                    |
| 6863   | TAC1        | tachykinin, precursor 1                          |
| 6900   | CNTN2       | contactin 2 (axonal)                             |
| 6911   | TBX6        | T-box 6                                          |
| 692233 | SNORD117    | small nucleolar RNA, C/D box 117                 |
| 6928   | HNF1B       | HNF1 homeobox B                                  |
| 7003   | TEAD1       | TEA domain family member 1 (SV40 transcriptic    |
| 7005   | TEAD3       | TEA domain family member 3                       |
| 7006   | TEC         | tec protein tyrosine kinase                      |
| 7089   | TLE2        | transducin-like enhancer of split 2 (E(sp1) homc |
| 7126   | TNFAIP1     | tumor necrosis factor, alpha-induced protein 1 ( |
| 7188   | TRAF5       | TNF receptor-associated factor 5                 |
| 723790 | HIST2H2AAA4 | histone cluster 2, H2aa4                         |
| 728229 | TMEM191B    | transmembrane protein 191B                       |
| 728537 | LOC728537   | uncharacterized LOC728537                        |
| 728577 | CNTNAP3B    | contactin associated protein-like 3B             |
| 7286   | TUFT1       | tuftelin 1                                       |
| 728752 | LOC728752   | uncharacterized LOC728752                        |
| 7291   | TWIST1      | twist homolog 1 (Drosophila)                     |
| 729603 | LOC729603   | calcium binding protein P22 pseudogene           |
| 729956 | SHISA7      | shisa homolog 7 (Xenopus laevis)                 |
| 729970 | LOC729970   | hCG2028352-like                                  |
| 729993 | SHISA9      | shisa homolog 9 (Xenopus laevis)                 |
| 7403   | KDM6A       | lysine (K)-specific demethylase 6A               |
| 7425   | VGf         | VGf nerve growth factor inducible                |
| 7434   | VIPR2       | vasoactive intestinal peptide receptor 2         |
| 7447   | VSNL1       | visinin-like 1                                   |
| 7464   | CORO2A      | coronin, actin binding protein, 2A               |
| 7473   | WNT3        | wingless-type MMTV integration site family, me   |
| 7525   | YES1        | v-yes-1 Yamaguchi sarcoma viral oncogene horr    |
| 7593   | MZF1        | myeloid zinc finger 1                            |
| 7597   | ZBTB25      | zinc finger and BTB domain containing 25         |
| 761    | CA3         | carbonic anhydrase III, muscle specific          |

|        |            |                                                  |
|--------|------------|--------------------------------------------------|
| 768    | CA9        | carbonic anhydrase IX                            |
| 770    | CA11       | carbonic anhydrase XI                            |
| 7718   | ZNF165     | zinc finger protein 165                          |
| 7737   | RNF113A    | ring finger protein 113A                         |
| 777    | CACNA1E    | calcium channel, voltage-dependent, R type, alj  |
| 7804   | LRP8       | low density lipoprotein receptor-related proteir |
| 784    | CACNB3     | calcium channel, voltage-dependent, beta 3 sut   |
| 7846   | TUBA1A     | tubulin, alpha 1a                                |
| 785    | CACNB4     | calcium channel, voltage-dependent, beta 4 sut   |
| 79001  | VKORC1     | vitamin K epoxide reductase complex, subunit 1   |
| 79036  | C19orf50   | chromosome 19 open reading frame 50              |
| 79081  | C11orf48   | chromosome 11 open reading frame 48              |
| 79090  | TRAPPC6A   | trafficking protein particle complex 6A          |
| 790952 | ESRG       | embryonic stem cell related (non-protein codin,  |
| 79098  | C1orf116   | chromosome 1 open reading frame 116              |
| 7919   | DDX39B     | DEAD (Asp-Glu-Ala-Asp) box polypeptide 39B       |
| 79228  | THOC6      | THO complex 6 homolog (Drosophila)               |
| 7923   | HSD17B8    | hydroxysteroid (17-beta) dehydrogenase 8         |
| 79365  | BHLHE41    | basic helix-loop-helix family, member e41        |
| 79369  | B3GNT4     | UDP-GlcNAc:betaGal beta-1,3-N-acetylglucosan     |
| 79567  | FAM65A     | family with sequence similarity 65, member A     |
| 79583  | TMEM231    | transmembrane protein 231                        |
| 79589  | RNF128     | ring finger protein 128                          |
| 796    | CALCA      | calcitonin-related polypeptide alpha             |
| 79628  | SH3TC2     | SH3 domain and tetratricopeptide repeats 2       |
| 79635  | CCDC121    | coiled-coil domain containing 121                |
| 79639  | TMEM53     | transmembrane protein 53                         |
| 79646  | PANK3      | pantothenate kinase 3                            |
| 79656  | BEND5      | BEN domain containing 5                          |
| 79661  | NEIL1      | nei endonuclease VIII-like 1 (E. coli)           |
| 79667  | FLJ13197   | uncharacterized FLJ13197                         |
| 79690  | GAL3ST4    | galactose-3-O-sulfotransferase 4                 |
| 79729  | SH3D21     | SH3 domain containing 21                         |
| 79739  | TTLL7      | tubulin tyrosine ligase-like family, member 7    |
| 79772  | MCTP1      | multiple C2 domains, transmembrane 1             |
| 79783  | C7orf10    | chromosome 7 open reading frame 10               |
| 79816  | TLE6       | transducin-like enhancer of split 6 (E(sp1) homc |
| 79841  | AGBL2      | ATP/GTP binding protein-like 2                   |
| 79854  | LINC00115  | long intergenic non-protein coding RNA 115       |
| 79873  | NUDT18     | nudix (nucleoside diphosphate linked moiety X)   |
| 79896  | THNSL1     | threonine synthase-like 1 (S. cerevisiae)        |
| 79899  | PRR5L      | proline rich 5 like                              |
| 79919  | C2orf54    | chromosome 2 open reading frame 54               |
| 79930  | DOK3       | docking protein 3                                |
| 79937  | CNTNAP3    | contactin associated protein-like 3              |
| 79939  | SLC35E1    | solute carrier family 35, member E1              |
| 79958  | DENND1C    | DENN/MADD domain containing 1C                   |
| 79960  | PHF17      | PHD finger protein 17                            |
| 79963  | ABCA11P    | ATP-binding cassette, sub-family A (ABC1), mer   |
| 79987  | SVEP1      | sushi, von Willebrand factor type A, EGF and pe  |
| 79991  | OBFC1      | oligonucleotide/oligosaccharide-binding fold co  |
| 79992  | AGPAT4-IT1 | AGPAT4 intronic transcript 1 (non-protein codir  |

|       |            |                                                   |
|-------|------------|---------------------------------------------------|
| 80070 | ADAMTS20   | ADAM metallopeptidase with thrombospondin         |
| 80108 | ZFP2       | zinc finger protein 2 homolog (mouse)             |
| 80115 | BAIAP2L2   | BAI1-associated protein 2-like 2                  |
| 80173 | IFT74      | intraflagellar transport 74 homolog (Chlamydon    |
| 80312 | TET1       | tet methylcytosine dioxygenase 1                  |
| 80329 | ULBP1      | UL16 binding protein 1                            |
| 80339 | PNPLA3     | patatin-like phospholipase domain containing 3    |
| 80705 | TSGA10     | testis specific, 10                               |
| 80736 | SLC44A4    | solute carrier family 44, member 4                |
| 80758 | PRR7       | proline rich 7 (synaptic)                         |
| 80856 | KIAA1715   | KIAA1715                                          |
| 80864 | EGFL8      | EGF-like-domain, multiple 8                       |
| 81544 | GDPD5      | glycerophosphodiester phosphodiesterase dom       |
| 81551 | STMN4      | stathmin-like 4                                   |
| 81575 | APOLD1     | apolipoprotein L domain containing 1              |
| 81603 | TRIM8      | tripartite motif containing 8                     |
| 81671 | VMP1       | vacuole membrane protein 1                        |
| 817   | CAMK2D     | calcium/calmodulin-dependent protein kinase I     |
| 81788 | NUAK2      | NUAK family, SNF1-like kinase, 2                  |
| 81855 | SFXN3      | sideroflexin 3                                    |
| 83259 | PCDH11Y    | protocadherin 11 Y-linked                         |
| 8337  | HIST2H2AA3 | histone cluster 2, H2aa3                          |
| 8353  | HIST1H3E   | histone cluster 1, H3e                            |
| 83591 | THAP2      | THAP domain containing, apoptosis associated      |
| 83592 | AKR1E2     | aldo-keto reductase family 1, member E2           |
| 83715 | ESPN       | espin                                             |
| 83723 | FAM57B     | family with sequence similarity 57, member B      |
| 83851 | SYT16      | synaptotagmin XVI                                 |
| 83856 | FSD1L      | fibronectin type III and SPRY domain containing   |
| 83886 | PRSS27     | protease, serine 27                               |
| 83891 | SNX25      | sorting nexin 25                                  |
| 8398  | PLA2G6     | phospholipase A2, group VI (cytosolic, calcium-i  |
| 84000 | TMPRSS13   | transmembrane protease, serine 13                 |
| 8403  | SOX14      | SRY (sex determining region Y)-box 14             |
| 84033 | OBSCN      | obscurin, cytoskeletal calmodulin and titin-inter |
| 84034 | EMILIN2    | elastin microfibril interfacier 2                 |
| 84058 | WDR54      | WD repeat domain 54                               |
| 84084 | RAB6C      | RAB6C, member RAS oncogene family                 |
| 84129 | ACAD11     | acyl-CoA dehydrogenase family, member 11          |
| 84163 | GTF2IRD2   | GTF2I repeat domain containing 2                  |
| 84222 | TMEM191A   | transmembrane protein 191A                        |
| 84249 | PSD2       | pleckstrin and Sec7 domain containing 2           |
| 84251 | SGIP1      | SH3-domain GRB2-like (endophilin) interacting     |
| 84261 | FBXW9      | F-box and WD repeat domain containing 9           |
| 84293 | C10orf58   | chromosome 10 open reading frame 58               |
| 84314 | TMEM107    | transmembrane protein 107                         |
| 84324 | SARNP      | SAP domain containing ribonucleoprotein           |
| 8433  | UTF1       | undifferentiated embryonic cell transcription fa  |
| 84336 | TMEM101    | transmembrane protein 101                         |
| 84449 | ZNF333     | zinc finger protein 333                           |
| 84460 | ZMAT1      | zinc finger, matrin-type 1                        |
| 84557 | MAP1LC3A   | microtubule-associated protein 1 light chain 3 a  |



|       |           |                                                            |
|-------|-----------|------------------------------------------------------------|
| 84617 | TUBB6     | tubulin, beta 6 class V                                    |
| 8462  | KLF11     | Kruppel-like factor 11                                     |
| 84634 | KISS1R    | KISS1 receptor                                             |
| 84678 | KDM2B     | lysine (K)-specific demethylase 2B                         |
| 84695 | LOXL3     | lysyl oxidase-like 3                                       |
| 84698 | CAPS2     | calcyphosine 2                                             |
| 84700 | MYO18B    | myosin XVIIIIB                                             |
| 84706 | GPT2      | glutamic pyruvate transaminase (alanine amino              |
| 84708 | LNX1      | ligand of numb-protein X 1                                 |
| 84709 | C4orf49   | chromosome 4 open reading frame 49                         |
| 84848 | MGC16121  | uncharacterized protein MGC16121                           |
| 84910 | TMEM87B   | transmembrane protein 87B                                  |
| 84929 | FIBCD1    | fibrinogen C domain containing 1                           |
| 84941 | HSH2D     | hematopoietic SH2 domain containing                        |
| 84951 | TNS4      | tensin 4                                                   |
| 84957 | RELT      | RELT tumor necrosis factor receptor                        |
| 84962 | JUB       | jub, ajuba homolog (Xenopus laevis)                        |
| 84966 | IGSF21    | immunoglobulin superfamily, member 21                      |
| 84969 | TOX2      | TOX high mobility group box family member 2                |
| 8504  | PEX3      | peroxisomal biogenesis factor 3                            |
| 8525  | DGKZ      | diacylglycerol kinase, zeta                                |
| 85301 | COL27A1   | collagen, type XXVII, alpha 1                              |
| 85360 | SYDE1     | synapse defective 1, Rho GTPase, homolog 1 (C.             |
| 85443 | DCLK3     | doublecortin-like kinase 3                                 |
| 85465 | EPT1      | ethanolaminephosphotransferase 1 (CDP-ethan                |
| 85480 | TSLP      | thymic stromal lymphopietin                                |
| 860   | RUNX2     | runt-related transcription factor 2                        |
| 8622  | PDE8B     | phosphodiesterase 8B                                       |
| 8637  | EIF4EBP3  | eukaryotic translation initiation factor 4E bindin         |
| 8701  | DNAH11    | dynein, axonemal, heavy chain 11                           |
| 8715  | NOL4      | nucleolar protein 4                                        |
| 8793  | TNFRSF10D | tumor necrosis factor receptor superfamily, me             |
| 8795  | TNFRSF10B | tumor necrosis factor receptor superfamily, me             |
| 8797  | TNFRSF10A | tumor necrosis factor receptor superfamily, me             |
| 883   | CCBL1     | cysteine conjugate-beta lyase, cytoplasmic                 |
| 8862  | APLN      | apelin                                                     |
| 8911  | CACNA1I   | calcium channel, voltage-dependent, T type, alç            |
| 89782 | LMLN      | leishmanolysin-like (metallopeptidase M8 famil             |
| 89795 | NAV3      | neuron navigator 3                                         |
| 8989  | TRPA1     | transient receptor potential cation channel, sub           |
| 8999  | CDKL2     | cyclin-dependent kinase-like 2 (CDC2-related kii           |
| 9001  | HAP1      | huntingtin-associated protein 1                            |
| 9020  | MAP3K14   | mitogen-activated protein kinase kinase kinase             |
| 90332 | EXOC3L2   | exocyst complex component 3-like 2                         |
| 90338 | ZNF160    | zinc finger protein 160                                    |
| 90423 | ATP6V1E2  | ATPase, H <sup>+</sup> transporting, lysosomal 31kDa, V1 s |
| 9044  | BTA1      | BTA1 RNA polymerase II, B-TFIID transcription              |
| 9052  | GPRC5A    | G protein-coupled receptor, family C, group 5, r           |
| 90557 | CCDC74A   | coiled-coil domain containing 74A                          |
| 90594 | ZNF439    | zinc finger protein 439                                    |
| 90627 | STARD13   | StAR-related lipid transfer (START) domain cont            |
| 90673 | PPP1R3E   | protein phosphatase 1, regulatory subunit 3E               |

|       |          |                                                            |
|-------|----------|------------------------------------------------------------|
| 9076  | CLDN1    | claudin 1                                                  |
| 90853 | SPOCD1   | SPOC domain containing 1                                   |
| 90874 | ZNF697   | zinc finger protein 697                                    |
| 9098  | USP6     | ubiquitin specific peptidase 6 (Tre-2 oncogene)            |
| 90993 | CREB3L1  | cAMP responsive element binding protein 3-like             |
| 9118  | INA      | internexin neuronal intermediate filament prot             |
| 91319 | DERL3    | Der1-like domain family, member 3                          |
| 91373 | UAP1L1   | UDP-N-acteylglucosamine pyrophosphorylase 1                |
| 91409 | CCDC74B  | coiled-coil domain containing 74B                          |
| 9143  | SYNGR3   | synaptogyrin 3                                             |
| 91452 | ACBD5    | acyl-CoA binding domain containing 5                       |
| 91523 | FAM113B  | family with sequence similarity 113, member B              |
| 91607 | SLFN11   | schlafen family member 11                                  |
| 91662 | NLRP12   | NLR family, pyrin domain containing 12                     |
| 91663 | MYADM    | myeloid-associated differentiation marker                  |
| 91947 | ARRDC4   | arrestin domain containing 4                               |
| 9196  | KCNAB3   | potassium voltage-gated channel, shaker-relate             |
| 9201  | DCLK1    | doublecortin-like kinase 1                                 |
| 92092 | ZC3HAV1L | zinc finger CCCH-type, antiviral 1-like                    |
| 92162 | TMEM88   | transmembrane protein 88                                   |
| 92211 | CDHR1    | cadherin-related family member 1                           |
| 92270 | ATP6AP1L | ATPase, H <sup>+</sup> transporting, lysosomal accessory p |
| 92421 | CHMP4C   | charged multivesicular body protein 4C                     |
| 92565 | FANK1    | fibronectin type III and ankyrin repeat domains            |
| 9278  | ZBTB22   | zinc finger and BTB domain containing 22                   |
| 92949 | ADAMTSL1 | ADAMTS-like 1                                              |
| 930   | CD19     | CD19 molecule                                              |
| 9311  | ACCN3    | amiloride-sensitive cation channel 3                       |
| 93129 | ORAI3    | ORAI calcium release-activated calcium modula              |
| 9350  | CER1     | cerberus 1, cysteine knot superfamily, homolog             |
| 9363  | RAB33A   | RAB33A, member RAS oncogene family                         |
| 93649 | MYOCD    | myocardin                                                  |
| 9369  | NRXN3    | neurexin 3                                                 |
| 9378  | NRXN1    | neurexin 1                                                 |
| 9388  | LIPG     | lipase, endothelial                                        |
| 93953 | ACRC     | acidic repeat containing                                   |
| 94122 | SYTL5    | synaptotagmin-like 5                                       |
| 9413  | FAM189A2 | family with sequence similarity 189, member A2             |
| 9424  | KCNK6    | potassium channel, subfamily K, member 6                   |
| 9468  | PCYT1B   | phosphate cytidyltransferase 1, choline, beta              |
| 9478  | CABP1    | calcium binding protein 1                                  |
| 9497  | SLC4A7   | solute carrier family 4, sodium bicarbonate cotr           |
| 9518  | GDF15    | growth differentiation factor 15                           |
| 953   | ENTPD1   | ectonucleoside triphosphate diphosphohydrola               |
| 954   | ENTPD2   | ectonucleoside triphosphate diphosphohydrola               |
| 9568  | GABBR2   | gamma-aminobutyric acid (GABA) B receptor, 2               |
| 9586  | CREB5    | cAMP responsive element binding protein 5                  |
| 9628  | RGS6     | regulator of G-protein signaling 6                         |
| 9645  | MICAL2   | microtubule associated monooxygenase, calponi              |
| 9708  | PCDHGA8  | protocadherin gamma subfamily A, 8                         |
| 9718  | ECE2     | endothelin converting enzyme :                             |
| 9725  | TMEM63A  | transmembrane protein 63A                                  |

|      |        |                                                  |
|------|--------|--------------------------------------------------|
| 9744 | ACAP1  | ArfGAP with coiled-coil, ankyrin repeat and PH c |
| 9780 | PIEZO1 | piezo-type mechanosensitive ion channel comp     |
| 9796 | PHYHIP | phytanoyl-CoA 2-hydroxylase interacting protei   |
| 98   | ACYP2  | acylphosphatase 2, muscle type                   |
| 9820 | CUL7   | cullin 7                                         |
| 9829 | DNAJC6 | DnaJ (Hsp40) homolog, subfamily C, member 6      |
| 9853 | RUSC2  | RUN and SH3 domain containing 2                  |
| 9899 | SV2B   | synaptic vesicle glycoprotein 2B                 |
| 9931 | HELZ   | helicase with zinc finger                        |
| 9956 | HS3ST2 | heparan sulfate (glucosamine) 3-O-sulfotransfer  |
| 9982 | FGFBP1 | fibroblast growth factor binding protein 1       |
| 9985 | REC8   | REC8 homolog (yeast)                             |

| p-value  | FDR q-value |
|----------|-------------|
| 1.58E-90 | 7.92E-89    |
| 6.89E-62 | 1.72E-60    |
| 1.09E-41 | 1.81E-40    |
| 4.70E-39 | 5.87E-38    |
| 3.48E-33 | 3.48E-32    |
| 3.64E-31 | 3.04E-30    |
| 3.59E-30 | 2.56E-29    |
| 6.93E-21 | 4.33E-20    |
| 4.06E-20 | 2.25E-19    |
| 5.03E-20 | 2.52E-19    |

|                           |                                            |                      |                     |                      |              |              |
|---------------------------|--------------------------------------------|----------------------|---------------------|----------------------|--------------|--------------|
| HALLMARK_MT               | HALLMARK_CH                                | HALLMARK_EPI         | HALLMARK_GL'        | HALLMARK_P5:         | HALLMARK_MY  | HALLMARK_API |
| HALLMARK_MT               | HALLMARK_CHOLESTEROL_HOMEOSTASIS           |                      |                     |                      |              |              |
| HALLMARK_MTORC1_SIGNALING |                                            |                      |                     | HALLMARK_P5:         | HALLMARK_MY  | HALLMARK_API |
| HALLMARK_MTORC1_SIGNALING |                                            |                      |                     | HALLMARK_P53_PATHWAY |              |              |
| HALLMARK_MTORC1_SIGNALING |                                            |                      |                     | HALLMARK_MYOGENESIS  |              |              |
| HALLMARK_MTORC1_SIGNALING |                                            |                      |                     |                      |              |              |
| FA_SIGNALING_             | HALLMARK_CHOLESTEROL_HOMEOSTASIS           |                      |                     | HALLMARK_P53_PATHWAY | HALLMARK_API |              |
| FA_SIGNALING_             | HALLMARK_CHOLESTEROL_HOMEOSTASIS           |                      |                     |                      |              |              |
| FA_SIGNALING_VIA_NFKB     | HALLMARK_EPI                               | HALLMARK_GLYCOLYSIS  |                     |                      |              |              |
| FA_SIGNALING_VIA_NFKB     | HALLMARK_EPITHELIAL_MESEN                  | HALLMARK_P53_PATHWAY |                     | HALLMARK_API         |              |              |
| FA_SIGNALING_VIA_NFKB     | HALLMARK_EPITHELIAL_MESENCHYMAL_TRANSITION |                      |                     |                      |              |              |
| FA_SIGNALING_VIA_NFKB     | HALLMARK_EPITHELIAL_MESENCHYMAL_TRANSITION |                      |                     |                      |              |              |
| FA_SIGNALING_VIA_NFKB     | HALLMARK_EPITHELIAL_MESENCHYMAL_TRANSITION |                      |                     |                      |              |              |
| FA_SIGNALING_VIA_NFKB     |                                            |                      | HALLMARK_GL'        | HALLMARK_P53_PATHWAY | HALLMARK_API |              |
| FA_SIGNALING_VIA_NFKB     |                                            |                      |                     | HALLMARK_P53_PATHWAY |              |              |
| FA_SIGNALING_VIA_NFKB     |                                            |                      |                     | HALLMARK_P53_PATHWAY |              |              |
| FA_SIGNALING_VIA_NFKB     |                                            |                      |                     |                      |              |              |
| FA_SIGNALING_VIA_NFKB     |                                            |                      |                     |                      |              |              |
| FA_SIGNALING_VIA_NFKB     |                                            |                      |                     |                      |              |              |
| FA_SIGNALING_VIA_NFKB     |                                            |                      |                     |                      |              |              |
| FA_SIGNALING_VIA_NFKB     |                                            |                      |                     |                      |              |              |
| FA_SIGNALING_VIA_NFKB     |                                            |                      |                     |                      |              |              |
| FA_SIGNALING_VIA_NFKB     |                                            |                      |                     |                      |              |              |
| FA_SIGNALING_VIA_NFKB     |                                            |                      |                     |                      |              |              |
| FA_SIGNALING_VIA_NFKB     |                                            |                      |                     |                      |              |              |
| FA_SIGNALING_VIA_NFKB     |                                            |                      |                     |                      |              |              |
| FA_SIGNALING_VIA_NFKB     |                                            |                      |                     |                      |              |              |
| HALLMARK_MTORC1_SIGNALING |                                            |                      | HALLMARK_GL'        | HALLMARK_P53_PATHWAY |              |              |
| HALLMARK_MTORC1_SIGNALING |                                            |                      | HALLMARK_GLYCOLYSIS |                      |              |              |
| HALLMARK_MTORC1_SIGNALING |                                            |                      | HALLMARK_GLYCOLYSIS |                      |              |              |
| HALLMARK_MTORC1_SIGNALING |                                            |                      | HALLMARK_GLYCOLYSIS |                      |              |              |



|                           |                                            |                      |                     |
|---------------------------|--------------------------------------------|----------------------|---------------------|
| HALLMARK_MT               | HALLMARK_CHOLESTEROL_HOMEOSTASIS           |                      |                     |
| HALLMARK_MTORC1_SIGNALING |                                            | HALLMARK_P53_PATHWAY | HALLMARK_APO        |
| HALLMARK_MTORC1_SIGNALING |                                            |                      |                     |
| FA_SIGNALING_VIA_NFKB     | HALLMARK_EPI                               | HALLMARK_GLYCOLYSIS  | HALLMARK_APO        |
| FA_SIGNALING_VIA_NFKB     | HALLMARK_EPITHELIAL_MESEN                  | HALLMARK_P53_PATHWAY | HALLMARK_APO        |
| FA_SIGNALING_VIA_NFKB     | HALLMARK_EPITHELIAL_MESENCHYMAL_TRAN       | HALLMARK_MY          | HALLMARK_APO        |
| FA_SIGNALING_VIA_NFKB     | HALLMARK_EPITHELIAL_MESENCHYMAL_TRANSITION |                      | HALLMARK_APO        |
| FA_SIGNALING_VIA_NFKB     | HALLMARK_EPITHELIAL_MESENCHYMAL_TRANSITION |                      |                     |
| FA_SIGNALING_VIA_NFKB     | HALLMARK_EPITHELIAL_MESENCHYMAL_TRANSITION |                      |                     |
| FA_SIGNALING_VIA_NFKB     | HALLMARK_EPITHELIAL_MESENCHYMAL_TRANSITION |                      |                     |
| FA_SIGNALING_VIA_NFKB     | HALLMARK_EPITHELIAL_MESENCHYMAL_TRANSITION |                      |                     |
| FA_SIGNALING_VIA_NFKB     | HALLMARK_EPITHELIAL_MESENCHYMAL_TRANSITION |                      |                     |
| FA_SIGNALING_VIA_NFKB     |                                            | HALLMARK_P53         | HALLMARK_MYOGENESIS |
| FA_SIGNALING_VIA_NFKB     |                                            | HALLMARK_P53         | HALLMARK_MYOGENESIS |
| FA_SIGNALING_VIA_NFKB     |                                            | HALLMARK_P53_PATHWAY | HALLMARK_APO        |
| FA_SIGNALING_VIA_NFKB     |                                            | HALLMARK_P53_PATHWAY | HALLMARK_APO        |
| FA_SIGNALING_VIA_NFKB     |                                            | HALLMARK_P53_PATHWAY |                     |
| FA_SIGNALING_VIA_NFKB     |                                            | HALLMARK_P53_PATHWAY |                     |
| FA_SIGNALING_VIA_NFKB     |                                            | HALLMARK_P53_PATHWAY |                     |
| FA_SIGNALING_VIA_NFKB     |                                            | HALLMARK_P53_PATHWAY |                     |
| FA_SIGNALING_VIA_NFKB     |                                            | HALLMARK_P53_PATHWAY |                     |
| FA_SIGNALING_VIA_NFKB     |                                            | HALLMARK_P53_PATHWAY |                     |
| FA_SIGNALING_VIA_NFKB     |                                            |                      | HALLMARK_APO        |
| FA_SIGNALING_VIA_NFKB     |                                            |                      | HALLMARK_APO        |
| FA_SIGNALING_VIA_NFKB     |                                            |                      |                     |
| FA_SIGNALING_VIA_NFKB     |                                            |                      |                     |
| FA_SIGNALING_VIA_NFKB     |                                            |                      |                     |
| FA_SIGNALING_VIA_NFKB     |                                            |                      |                     |
| FA_SIGNALING_VIA_NFKB     |                                            |                      |                     |











affinity glutamate transporter, system Xag), member 1

e 21

ociated coagulation inhibitor)

) 9

alpha 1A subunit

s), member 2

ber 8

ene homolog

el, 7

ber 15

2)

ptide 11

e 3

eric

n 1)

type 1 motif, 1

kinase 1

og (mouse)

ene homolog B (avian)

ain containing 1

risiae)

sis 1

precursor)

se 1 homolog D (*S. cerevisiae*)

rotein

umber 2

4

e) 8

type 1 motif, 5

it of VLA-3 receptor)

ntaining 2A

cha polypeptide

ubunit 1

proteoglycan (testican) 2

member 5

ber 5

ly down-regulated 4

g 1

coli)

inase 3

ltransferase 4

aha 1B subunit  
eptide 1

nsporters), member 4

(parkin)

member C

aha 1F subunit

: subunit

its CDK4)

3

olog (*S. cerevisiae*)

e G (32kD)-like

1 complex, alpha subunit 1 pseudogene 9

(Drosophila)



1 C)

ase)

e 1

ember 1

porter), member 13

family, member 4  
of N-acetylgalactosaminyltransferase 13 (GalNAc-T13)  
factor 2

containing 12

member 13C

acid PH domain 2

peptide 1

name 1

entry SgK494

receptor

eag-related), member 8

ane protein 2

og (*S. cerevisiae*)

orter), member 1

orter), member 14

taining 11

(*Xenopus laevis*)

type 8B, member 3

:4

on antiporter 2), member 1

porter), member 12  
ptide 1

idogene 2

ositol anchor 2  
;6-like

pe 5  
er 2

erase)

. cerevisiae)

phila)-like 3 (Hu antigen C)

cerevisiae)

oxylic acid transporter 13)

tor 3

omain)  
tin protein ligas

ein

ollistatin-like domains 2

: 2

ubunit C2

lpha 1  
lpha 2

amma 1

molog (*Xenopus laevis*)

acetylglucosaminyltransferase, isozyme C (putative)

de N-acetylgalactosaminyltransferase 2 (GalNAc-T2  
nouse)

-type motif 13

G (with RhoGef domain) member 3

gulated  
midinotransferase)  
ge factor

r), member 5

channel, subfamily M, beta member 4  
ic polypeptide-like 3C  
te 5  
releasing hormone)

:protein coding)

-type motif 7

member A

siae)

pseudogene  
family, member 6  
member 10d, decoy with truncated death domain pseudogene  
(protein type B-like)

artate 2A

receptor-like 2

binding protein  
pseudogene



cbfB type

ltransferase 6

elix-loop-helix protein

member 4C1

de N-acetylgalactosaminyltransferase-like 4

number 1

ly J, member 6

fier, subfamily S, member 1

or 2

7

15  
e 3

coding)

seudogene

9

seudogene

i-protein coding)

calcineurin-dependent 4

ysin 1

: 1

chordin-like)

(Xenopus laevis)

atalytic subunit

ing 1

hatase 4  
, class A  
, class H

orming protein 3  
(l-specific)  
ed)

ie 3

ember 4

ning 1

ie 1

) 1

a isozyme

or family, member 2

, class V

bitor beta

elta subunit 3

oid microdomains 1

nber 1

porter light chain, asc system), member 10

ontaining 1B

complex, 4-like 2  
amine 3-beta-galactosyltransferase, 1

glandin G/H synthase and cyclooxygenase)

H (with MyTH4 domain) member 1

ain containing 2

aining 9

taining 16

ubunit 2

mber 14

asmembrane domain (TM) and short cytoplasmic domain, (semaphorin) 4G

ig factor 1

binding protein  
protein 2

transcription factor 2

2 (Drosophila)

de N-acetylgalactosaminyltransferase 11 (GalNAc-T11)  
part basic domain, secreted, (semaphorin) 3F

transmembrane domain (TM) and short cytoplasmic domain, (semaphorin) 4A

protein 1

protein B

umber 3  
ger), member 2  
ger), member 1  
ger), member 3  
nger), member 5

dogene  
e D, 44kDa

ide 1, 43kDa  
ide 3, 50kDa  
ein A1, 59kDa, acidic component)

onal enhancer factor)

olog, Drosophila)  
(endothelial)

umber 3  
olog 1



gha 1E subunit  
18, apolipoprotein e receptor  
unit  
unit

vinyltransferase

log, Drosophila)

-type motif 18

ber 11, pseudogene  
ntraxin domain containing 1  
ntaining 1

type 1 motif, 20

nonas)

ain containing 5

I delta

protein 2

1-like

ndependent)

acting RhoGEF

protein 1

ctor 1

Ipha

transferase) 2

. elegans)

olamine-specific)

ig protein 3

mber 10d, decoy with truncated death domain

mber 10b

mber 10a

pha 1l subunit

y)

family A, member 1

nase)

14

ubunit E2

factor-associated, 170kDa (Mot1 homolog, *S. cerevisiae*)

number A

aining 13

1

ein, alpha

-like 1

d subfamily, beta member 3

rotein 1-like

1

tor 3

(*Xenopus laevis*)

ansporter, member 7

se 1

se 2

n and LIM domain containing 2

domains 1  
onent 1

rase 2

HALLMARK\_ESTROGEN\_RESPONSE\_EARLY

OPTOSIS

HALLMARK\_ESTROGEN\_RESPONSE\_EARLY

OPTOSIS

OPTOSIS

OPTOSIS

HALLMARK\_ESTROGEN\_RESPONSE\_EARLY

HALLMARK\_ESTROGEN\_RESPONSE\_EARLY

OPTOSIS

HALLMARK\_ESTROGEN\_RESPONSE\_EARLY

OPTOSIS

HALLMARK\_ESTROGEN\_RESPONSE\_EARLY

OPTOSIS

OPTOSIS

OPTOSIS

HALLMARK\_ESTROGEN\_RESPONSE\_EARLY

OPTOSIS

HALLMARK\_ESTROGEN\_RESPONSE\_EARLY

OPTOSIS

OPTOSIS

OPTOSIS

OPTOSIS

OPTOSIS

HALLMARK\_ESTROGEN\_RESPONSE\_EARLY

HALLMARK\_ESTROGEN\_RESPONSE\_EARLY

OPTOSIS

HALLMARK\_ESTROGEN\_RESPONSE\_EARLY

HALLMARK\_ESTROGEN\_RESPONSE\_EARLY

HALLMARK\_ESTROGEN\_RESPONSE\_EARLY



OPTOSIS

OPTOSIS

HALLMARK\_ESTROGEN\_RESPONSE\_EARLY

HALLMARK\_ESTROGEN\_RESPONSE\_EARLY

HALLMARK\_ESTROGEN\_RESPONSE\_EARLY

OPTOSIS

OPTOSIS

OPTOSIS

HALLMARK\_ESTROGEN\_RESPONSE\_EARLY

HALLMARK\_ESTROGEN\_RESPONSE\_EARLY

HALLMARK\_ESTROGEN\_RESPONSE\_EARLY

OPTOSIS

HALLMARK\_ESTROGEN\_RESPONSE\_EARLY

OPTOSIS

OPTOSIS

OPTOSIS

OPTOSIS

HALLMARK\_ESTROGEN\_RESPONSE\_EARLY



HALLMARK\_ESTROGEN\_RESPONSE\_EARLY  
HALLMARK\_ESTROGEN\_RESPONSE\_EARLY
